# Supplementary material for: Effects of IFIH1 rs1990760 variants on systemic inflammation and outcome in critically ill COVID-19 patients in an observational translational study
Source: eLife. 2022 Jan 21;11:e73012. doi: 10.7554/eLife.73012 (PMC8782569; doi:10.7554/eLife.73012)
Supplement: Figure 3—source data 1. [file elife-73012-fig3-data1.csv]

	CD14_positive_monocyte	CD4_positive_alpha_beta_T_cell	CD56dim_natural_killer_cell	CD8_positive_alpha_beta_T_cell	MAST_cell	basophil	hematopoietic_progenitor	macrophage_m1	macrophage_m2	memory_B_cell	myeloid_dendritic_cell	naive_B_cell	neutrophil	plasma_cell	plasmacytoid_dendritic_cell
1	0.230445192303874	0.152983172859031	0.0452900593635467	0.0171649994621976	0	0.0170152631822541	0.00504232814396265	0	0.0495849539448885	0.0282321002454176	0	0	0.425304869089512	0.0289370614053155	0
2	0.289025871458802	0.129963963049721	0.0173110625537088	0.00921125330358897	0	0.015852982849314	0	0.0045988915669491	0.0464105144635523	0	0	0.0194324104572755	0.414775746791934	0.0106115175958153	0.0203632097787505
3	0.187921738672153	0.18022820166066	0.0704611415963513	0.0220475537622028	0.00900817857288603	0.00725921931796298	0.0108610766759781	0.0361737910802309	0.0537513219716038	0.0402259721981766	0	0	0.333662359363875	0.0175502029680995	0.030849242159821
4	0.333273942862819	0.194396637752908	0.044598882080118	0.0166524577117825	0.0153179781764333	0.00826869192902189	0	0.0464569412602527	0	0.0218949950445629	0	0.0075371558427935	0.289169620710259	0.0203812072861323	0.00205148934291726
5	0.21588567473665	0.179340791682909	0.12472776469345	0.0218758875111606	0.0289217969483651	0	0.00957970873745729	0	0.0594790338274633	0	0.00354309038883338	0.0790662167562563	0.272532625218623	0.00311652072527499	0.00193088877355746
6	0.191116938779698	0.202614779076348	0.121150526616052	0.025606684462787	0	0.0116878372808846	0.00620922834350405	0	0.0672902415354728	0	0.0138951152761779	0.0389879870527944	0.31330665385142	0.00786892030577939	0.000265087419081168
7	0.21863345913359	0.174530654065537	0.0761653856058213	0.0233979597989556	0.000497844623258392	0.00574152412360244	0.00215463439855538	0	0.0343386075876075	0	0	0.0640427163652137	0.380269084062209	0.0125547599263839	0.00767337030926655
8	0.166181072787432	0.223663989987598	0.0950993933220878	0.0206014414766166	0.0701035628415186	0	0	0.0112767950486379	0	0	0	0.248992919775465	0.095144582533923	0.0689362422267206	0
9	0.164617683669441	0.292816300001201	0.113571355493021	0.0587574383594897	0.0418259557847925	0	0	0.0137118592963398	0	0	0	0.219798108042773	0.0374225550395582	0.0574787443133835	0
10	0.215710070285326	0.191040607111126	0.0306591321540683	0.0389133511297708	0.0349505024963062	0.00290941215523972	0	0.0703180556778447	0.0268948283310872	0.0326667313384662	0	0	0.349400026789685	3.88755550103482e-05	0.00649840697606906
11	0.199553604953677	0.277496413586838	0.110469670350799	0.0389395554516793	0.0356659741026244	0	0.00260940378151009	0	0.0298054787783711	0	0	0.203404778924322	0.0855070240115817	0.0139990743613824	0.00254902169721469
12	0.464674943743099	0.296097338376263	0.0443310258641773	0.0442075454942385	0.0288195960513434	0	0	0	0.00377189811142427	0	0	0.0912797660877456	0	9.47436589030077e-05	0.0267231426128057
13	0.231410830725294	0.325865985068048	0.0179897130600245	0.0427747100848843	0.0438569506356574	0	0	0	0	0	0	0.0879073952578246	0.110938379303026	0.0380428628006618	0.0316708717333976
14	0.288071775143038	0.261452545423281	0.0444170931032494	0.0402895637719029	0.0588746088636231	0	0	0	0.0177186242483193	0	0	0.129960091259033	0.0666337966044895	0.00948384597359277	0.0410100555686793
15	0.337674383763608	0.105069419310302	0.0270396242982612	0.0157338342013472	0.0137768996942044	5.92954304868382e-05	0	0	0.102401665018939	0	0	0.04155833083653	0.272581195171396	0.0460682474467352	0.0380371048281906
16	0.325848177510176	0.204097329458684	0.0333524882352638	0.0234565713094559	0.0125411909587227	0.00389276945028024	0	0.0246041328766841	0.0168953856678577	0	0	0.0543465634473612	0.261993017568578	0.0174250245594851	0.0215473489574505
17	0.305919631937849	0.219681960469168	0.0445558053168899	0.0295075373781888	0.015038422680986	0.00129762843058986	0	0	0.0415725694303763	0	0	0.0769418437591127	0.237624063877917	0.0264012116262561	0.00145932509266634
18	0.379387213716692	0.166876410715937	0.0416347813664799	0.0342232491381951	0.00427721672636174	0.00644172150231508	0	0	0.0566777044934649	0	0	0.014092496337609	0.233942182223486	0.0127747730535067	0.0496722507259525
19	0.220110702304257	0.144290641728529	0.0397705567423219	0.0187645355903211	0	0.0139353753707772	0.00491132446698993	0	0.0629559901331664	0.0325824804804411	0	0	0.439957021492848	0.0132098726637671	0.00951149902658195
20	0.237495023363176	0.162261683454795	0.0759896378945576	0.0200318943728226	0.0173934722181822	0	0	0	0.0828498163667107	0	0	0.133336779648831	0.23058815265883	0.0400535400220955	0
21	0.361024813284411	0.184160264305303	0.0370364184197819	0.0196433475450121	0.00355877606920372	0.00666054082913661	0	0	0.017775349374158	0.00547307081718818	0	0.0129216228476645	0.326867207553057	0.0224550062285068	0.00242358272657753
22	0.285882684226801	0.16224319528208	0.037329706587595	0.0165323460316784	0.0137834078298359	0.00300824588916155	0.00094051082571451	0.024893496062798	0.0262475267786516	0.0312489617221654	0	0	0.381866341598912	0.00882304078444581	0.00720053638016108
23	0.301733777788049	0.188240392816836	0.0913045563866974	0.0303857925624562	0	0.0155354856081053	0.0038199409729769	0	0.0412641846950946	0.00082902939045641	0	0.0116532720541213	0.275751619587201	0.0135882169390478	0.0258937311989582
24	0.316385543928771	0.16543701224846	0.0283099127796697	0.0401597550787441	0.0182147417730001	0.00475936265159384	0	0.0399651374642565	0.0686480075098068	0	0	0.0172465759884065	0.270558781416925	0.00335810813944946	0.0269570610209169
25	0.254932534018796	0.205604397372922	0.0664172235066785	0.0183705776893673	0.007531109291194	0.00255781547504557	0	0	0	0	0.0163089587375097	0.0379651046655187	0.365906167790844	0.0244061114521232	0
26	0.255945547570648	0.17966230826646	0.0859809006537225	0.0426062693379394	0	0.00699672336847595	0.00523046832052527	0	0.038482134210538	0	0	0.0928726976374074	0.267024101610187	0.0036218502218148	0.0116361048246975
27	0.364046746073059	0.265487744172294	0.0383434659839976	0.0401660173237042	0	0.0171558277455108	0	0.000521868066754179	0	0	0	0.0153962761471456	0.225147312552231	0.0146535331079277	0
28	0.221226898205073	0.135511808663511	0.0633808455911849	0.00425723427450866	0	0.00667418172587977	0.0125266525937687	0	0.00887085004874962	0	0	0.0701054683817761	0.401042961864783	0.000162359728870273	0
29	0.169370469965875	0.214726579590708	0.137652607620671	0.0367825600015042	0.0240446692102157	0	0.00883441201957665	0	0.0454198104496605	0	0.0071004086417216	0.187358655220907	0.16870982727916	0	0
30	0.128594816708719	0.214485843935923	0.158697917331823	0.0324936013835454	0.0453086866997143	0	0.0240467110059079	0	0.018624242718247	0	0	0.188855194075395	0.171267312295539	0	0
31	0.221134497497455	0.179103396754535	0.0994360650566559	0.0188842066870224	0.0233821323909007	0	0.0132927867213719	0	0.0430570152201434	0	0.0022582357047452	0.0870463572057161	0.308849724373693	0.00355558238776177	0
32	0.296655032077774	0.158268408942195	0.15557036744609	0.00435425272010409	0	0.00221323492985421	0.0457014737116699	0	0.0984154499669701	0	0.0172545654313513	0.179769081861345	0.0417981329126461	0	0
33	0.312048562231492	0.238728467016551	0.0833804198437569	0.0353688971240357	0	0.0182846617582937	0	0.00385919715404094	0.00583311823129304	0.0369133599695347	0	0	0.223319996238156	0.0236053608085973	0.0186579596242482
34	0.198447651489496	0.164463995554226	0.0593557188570126	0.0193969181282018	0	0.0125117023980152	0.0098779647020185	0	0.05847782171538	0	0	0.0248288368974194	0.423004237596493	0.0296351526617379	0
35	0.229498626815028	0.166522388047994	0.0849880560285187	0.0117914771169136	0.0168744202589071	0	0.00116396760970195	0	0.0488787516986991	0	0	0.102108147097813	0.323211272006536	0.0149628933198889	0
36	0.259276890519766	0.194124266598015	0.0830406434394894	0.012524958628098	0.0130523161365692	0.00262908524710225	0.000925810723471815	0	0.037884649961999	0	0	0.0620095878323143	0.322844997097337	0.0116867938158374	0
37	0.240842719165089	0.154446906063123	0.0628248072518318	0.00193422979890681	0	0.00596360839455057	0.0055836271062692	0	0.0813558954018975	0	0.00457975889316059	0.0294081642102589	0.397618943896427	0.0154413398184862	0
38	0.337884778183235	0.225493692056238	0.0193394978274424	0.0127990460722594	0.000372788329435327	0.00882283232585598	0	0.00975480262500346	0	0.00721035550073044	0	0	0.35516872464092	0.0166987269984743	0
39	0.210196498388317	0.237024974770066	0.109261698295192	0.0330032609752342	0	0.0180616630992501	0.026600491917187	0	0.0321240440907045	0	0	0.0281893036575217	0.26346864616	0.00641148457732379	0.0356579340692034
40	0.108554508239185	0.290582350814043	0.179957624711404	0.0570851263330365	0	0.0272168238394929	0.00688891298157553	0	0.0340912438645983	0.044321005754592	0.0011861167529283	0	0.194375381179753	0.00213733815316212	0.0298387550066674
41	0.236160407423676	0.170022275827084	0.0400446095935778	0.0161725042991517	0	0.013561142381761	0	0	0.0137145384187584	0.036767913004594	0	0	0.450601912223606	0.0229546968277912	0
42	0.175270524041537	0.235930968140494	0.139138269581826	0.0401134505280844	0.0316524238664421	0	0.00198379032985993	0.00475770146787739	0	0	0	0.189151996486932	0.151109021620526	0.0308918539364202	0
