# Supplementary material for: Effects of IFIH1 rs1990760 variants on systemic inflammation and outcome in critically ill COVID-19 patients in an observational translational study
Source: eLife. 2022 Jan 21;11:e73012. doi: 10.7554/eLife.73012 (PMC8782569; doi:10.7554/eLife.73012)
Supplement: Figure 4—source data 1. [file elife-73012-fig4-data1.csv]

	MDA5	steroids	CCL2	CCL3	CCL4	CCL7	CXCL9	CXCL10	CXCL16	IFN-b	IFN-g	IL-1b	IL-6	IL-8_CXCL8	IL-28B	TNFa
1	CC	0	3218.158	947.541	1693.67	528.015	8472.466	523.4	2895.766	1.41	20.298	43.647	243.072	294.577	15.554	72.137
2	CC	1	4233.644	1700.242	1974.606	639.754	5555.616	784.41	3994.846	1.41	4.94	1.77	202.015	123.002	15.74459	78.128
3	CC	1	2174.16	969.762	1602.049	639.754	10308.159	882.477	2495.62	1.41	4.94	11.84	587.061	117.062	15.74459	28.417
4	CC	0	6493.567	1005.161	1860.573	639.754	6793.32	648.883	2715.765	1.833	4.94	29.235	1900.816	681.759	15.93418	83.911
5	CC	0	3347.898	900.538	1648.649	528.015	3873.904	520.176	3536.107	1.41	4.94	3.953	1297.372	305.048	15.36238	52.505
6	CC	1	2588.765	924.495	1553.697	6.17	3051.398	196.032	2529.203	1.41	4.94	1.77	540.422	126.773	15.36238	0.823
7	CC	0	3167.974	1909.278	11306.035	877.851	9663.65	890.892	2981.339	469.216	258.837	108.58	1725.215	226.523	17.7796	176.994
8	CC	0	3565.817	1662.478	1602.049	674.392	3051.398	196.804	1976.974	1.833	4.94	1.77	706.467	524.584	16.1228	18.027
9	CC	0	5315.948	991.232	2081.141	547.592	5399.162	596.501	3034.277	1.41	4.94	18.213	2536.52	323.492	15.554	105.431
10	CC	0	5390.917	962.442	1974.606	6.17	5844.887	619.245	3250.237	1.41	4.94	3.953	1910.166	230.328	15.16972	105.431
11	CT	0	1738.133	849.458	1423.714	203.008	154.25	179.092	3204.338	1.41	4.94	1.77	1028.076	124.263	15.36238	0.823
12	CT	0	1851.916	849.458	1477.43	422.373	9491.48	420.973	2852.216	52.031	4.94	1.77	1160.661	107.967	15.554	0.823
13	CT	0	3341.92	849.458	1450.884	466.383	3873.904	423.937	2461.427	1.41	4.94	1.77	631.605	196.749	15.74459	2.34
14	CT	0	4059.007	916.615	1648.649	920.727	4864.805	597.464	2400.723	114.163	4.94	1.77	178.569	195.66	16.49718	23.494
15	CT	0	8597.358	939.955	1956.162	833.653	6108.773	730.948	1953.041	1.41	4.94	11.84	879.6	379.91	15.93418	92.254
16	CT	0	3092.359	976.999	1553.697	1441.79	5399.162	727.549	2513.551	1.41	4.94	1.77	389.555	526.443	15.74459	52.505
17	CT	0	7946.701	991.232	1693.67	674.392	5233.128	739.429	2638.709	1.41	4.94	3.953	1987.253	355.823	15.554	72.137
18	CT	0	4702.373	900.538	1553.697	375.351	4864.805	539.636	3199.818	1.41	4.94	1.77	447.911	265.719	15.16972	59.382
19	CT	0	3504.328	831.349	1625.557	487.454	5555.616	415.646	2494.723	1.41	4.94	1.77	103.955	220.253	15.554	0.823
20	CT	1	1255.946	752.028	1307.829	203.008	154.25	230.533	2170.119	1.41	4.94	1.77	58.973	93.613	15.74459	0.823
21	TT	0	4325.969	916.615	1648.649	399.286	6579.787	447.86	2250.704	1.41	313.225	18.213	575.116	215.689	15.16972	52.505
22	TT	0	7793.1	1058.138	2853.5	507.983	3873.904	564.983	2446.979	1.41	4.94	3.953	255.036	166.993	15.554	41.3
23	TT	0	1382.391	884.01	1450.884	95.079	154.25	153.841	1967.706	1.41	4.94	1.77	23.372	313.218	15.16972	0.823
24	TT	1	344.937	730.087	1367.321	6.17	154.25	36.282	1250.251	1.41	536.992	1.77	99.854	21.859	15.36238	0.823
25	TT	0	2286.309	752.028	1477.43	236.858	610.773	250.04	2022.119	1.41	4.94	1.77	44.637	108.843	15.26618	0.823
26	TT	0	686.025	1212.559	3186.982	165.263	4427.971	96.038	1508.303	1.41	4.94	29.235	156.133	1939.012	15.74459	2.34
27	TT	1	1220.41	831.349	1450.884	121.223	5233.128	343.676	2093.239	1.41	4.94	1.77	191.5	88.051	15.36238	0.823
28	TT	0	1435.085	812.617	1337.993	13.158	3873.904	306.99	2469.54	1.41	4.94	1.77	34.671	90.381	15.74459	0.823
