# Supplementary material for: Effects of IFIH1 rs1990760 variants on systemic inflammation and outcome in critically ill COVID-19 patients in an observational translational study
Source: eLife. 2022 Jan 21;11:e73012. doi: 10.7554/eLife.73012 (PMC8782569; doi:10.7554/eLife.73012)
Supplement: Figure 5—source data 1. [file elife-73012-fig5-data1.csv]

	group	genotype	IL6	FOXO3	STAT1	STAT3	patient
1	control	TT	0.195476665595973	1.40411907428019	0.572559119999522	0.429110726101923	EV1
2	poly I:C	TT	1.63225277495263	0.844198559220483	3.83596742080013	1.0481332943699	EV1
3	poly I:C + DEXA	TT	2.90327917533528	1.5185128980588	1.16097390182679	0.698489357471725	EV1
4	control	CC	2.30639456228119	1.43351146151461	0.966038804382766	1.08596811231119	EV10
5	poly I:C	CC	0.974246622348528	1.6029324070116	4.56844898655295	1.57509009463723	EV10
6	poly I:C + DEXA	CC	0.503228906043475	1.69715989905079	1.82262569133651	0.886678008470484	EV10
7	control	CT	0.774520905798858	1.28568792525567	1.69233117310218	0.549761490386044	EV11
8	poly I:C	CT	5.51125858044793	1.89088163263861	4.54111931696917	0.713028799053108	EV11
9	poly I:C + DEXA	CT	3.00898801074204	1.31681270357295	2.35589468883305	0.234221671892332	EV11
10	control	CT	0.723055383691085	1.27269410411905	0.805141737114018	0.527653650153867	EV12
11	poly I:C	CT	2.23749497913676	1.36379489233543	3.46749276848386	0.359128551880175	EV12
12	poly I:C + DEXA	CT	0.945510738400732	0.592561588955258	0.955621276447593	1.11682285154565	EV12
13	control	CT	0.104723699892319	0.7668767512333	1.55739825750632	1.25373297608747	EV13
14	poly I:C	CT	1.05325098556549	1.03500841687697	4.1604956119261	0.471546131158337	EV13
15	poly I:C + DEXA	CT	1.99522088517942	1.86683118116759	2.89155667148804	0.166610969416066	EV13
16	control	TT	0.449049293216304	0.854598038006578	0.64302377279832	0.757309315767377	EV14
17	poly I:C	TT	2.0323649405465	1.34797971431825	3.73208578447203	1.27113820498579	EV14
18	poly I:C + DEXA	TT	16.3273471013656	1.37098415218518	0.517349064543125	0.794599820623854	EV14
19	control	CC	0.388810943035432	0.553423701873591	0.258576514659596	0.401032937945185	EV15
20	poly I:C	CC	7.43212192615539	1.92102464915892	0.294914764343048	1.38753093495773	EV15
21	poly I:C + DEXA	CC	27.9207976403865	2.08164666330447	2.72825292590163	2.0239850373564	EV15
22	control	TT	2.7972266672444	0.824953137156881	0.481966457144347	1.27522004918874	EV16
23	poly I:C	TT	31.2358788021469	1.08043355377232	0.567981352214775	1.20939088451359	EV16
24	poly I:C + DEXA	TT	60.2909018828889	5.0155978401415	4.28407040153829	0.967156371718253	EV16
25	control	TT	NA	4.7126104337768	3.20894423775661	0.771923144587425	EV17
26	poly I:C	TT	20.2397701608267	1.15544633462012	6.99343246756102	2.60646894436183	EV17
27	poly I:C + DEXA	TT	74.7791770632139	12.935619979459	8.22322699676185	2.45081986662625	EV17
28	control	TT	NA	3.46366606084204	2.22220883256544	1.58600262955659	EV18
29	poly I:C	TT	NA	2.49817597332969	12.2724054031177	1.68968312055769	EV18
30	poly I:C + DEXA	TT	NA	9.34087517844638	0.175195390019886	NA	EV18
31	control	CC	0.260389463719848	0.957242912622536	0.948655963704586	1.64139087093134	EV2
32	poly I:C	CC	3.61471278554803	1.00923515629242	6.07068144330923	4.11927535633473	EV2
33	poly I:C + DEXA	CC	2.20229641455039	1.13551618927435	1.06540296881699	0.502748758484534	EV2
34	control	CC	0.480305862100806	0.634755068499927	0.2084037519468	0.710964033788063	EV3
35	poly I:C	CC	2.1197917251232	1.11296439378641	2.37737576613605	0.136167185243347	EV3
36	poly I:C + DEXA	CC	0.461351715555155	0.746863493687851	1.07636673765165	0.458900874685292	EV3
37	control	CC	0.161161481176198	NA	2.66877103833778	2.07179892438658	EV4
38	poly I:C	CC	4.16619194524996	1.24580330278979	5.68569217854473	1.44770734237904	EV4
39	poly I:C + DEXA	CC	14.6729680998524	1.12051498080014	3.24019406082629	1.02165471277328	EV4
40	control	TT	3.27948583226812	1.30344802529875	0.371955964164361	0.487103643834931	EV5
41	poly I:C	TT	4.08048427992208	1.4222635449507	1.86593105618984	0.590334553851759	EV5
42	poly I:C + DEXA	TT	13.0415055741748	2.17913280186232	1.99282656401475	1.30699740801839	EV5
43	control	CT	0.407800906358989	1.01134017835019	0.512725893997755	1.01046308557295	EV6
44	poly I:C	CT	6.80998235099467	1.77819918218916	6.49585956201934	1.82973115189952	EV6
45	poly I:C + DEXA	CT	14.9343652242038	2.90841197734635	1.93730234250238	1.13145820971051	EV6
46	control	CT	4.96672906819792	1.18336755237114	0.489737005262781	0.678262987472361	EV7
47	poly I:C	CT	NA	3.73395443080401	0.522705324827796	2.06953403927901	EV7
48	poly I:C + DEXA	CT	NA	1.24205670862734	3.18347793657907	0.373080591598664	EV7
49	control	TT	0.566888248774031	0.828047278378893	NA	NA	EV8
50	poly I:C	TT	7.01244517833525	0.823672619982131	1.46985185204058	0.900983878835479	EV8
51	poly I:C + DEXA	TT	22.1478057786136	1.56244882495998	1.2421908855051	1.025964187732	EV8
52	control	CT	0.42610772374735	0.901100344159984	0.892219859985429	1.06897093096495	EV9
53	poly I:C	CT	3.87709706683269	1.45646483481228	4.94667937988027	0.860207271437828	EV9
54	poly I:C + DEXA	CT	2.63799330387148	2.39193945662322	2.85418156621619	0.999140624157638	EV9
