# Supplementary material for: Effects of IFIH1 rs1990760 variants on systemic inflammation and outcome in critically ill COVID-19 patients in an observational translational study
Source: eLife. 2022 Jan 21;11:e73012. doi: 10.7554/eLife.73012 (PMC8782569; doi:10.7554/eLife.73012)
Supplement: Supplementary file 2. [file elife-73012-supp2.csv]

genename	baseMean	log2FoldChange	lfcSE	stat	pvalue	padj
TSPAN6	1,363762332	-0,149726141	0,771601249	-0,194046007	0,846139858
DPM1	697,6338646	-0,034851136	0,12506959	-0,278653954	0,780510403	0,986293275
SCYL3	143,622398	-0,295195496	0,160936553	-1,834235232	0,066619084	0,378600264
C1orf112	52,4921762	0,106642147	0,206925666	0,515364522	0,606298319	0,932596931
FGR	4948,346501	-0,119103801	0,191331321	-0,622500281	0,533612959	0,899250505
CFH	31,50456658	-0,232543532	0,431118237	-0,539396186	0,589613512	0,924378625
FUCA2	213,6608581	-0,065484961	0,242811631	-0,269694496	0,787395295	0,986771394
GCLC	272,8730627	1,171838301	0,285530827	4,104069293	4,05946E-05	0,014744853
NFYA	511,3038547	-0,177470934	0,170047931	-1,043652415	0,296646233	0,717951253
STPG1	32,22953182	0,01372854	0,219860657	0,062442004	0,950210846	0,999189109
NIPAL3	194,0250419	-0,466688147	0,277069953	-1,684369385	0,092110304	0,434252304
ENPP4	135,4036574	-0,304564448	0,256316686	-1,188234964	0,234740852	0,653149898
SEMA3F	21,14728475	0,43022208	0,606717892	0,7090974	0,478264036	0,867327823
ANKIB1	567,9914128	0,278959	0,173567492	1,607207644	0,108008826	0,464100413
CYP51A1	177,9234416	-0,019042461	0,230418181	-0,082643051	0,934135369	0,999189109
KRIT1	11,31665154	0,357399029	0,481194691	0,742732693	0,457643532	0,852831323
RAD52	32,65881434	0,307428686	0,277053168	1,109637866	0,267155107	0,688005912
BAD	115,3645358	0,166518337	0,195392016	0,852226929	0,394088153	0,805509929
LAP3	1288,102427	-0,787758119	0,427389964	-1,843183475	0,065302227	0,378311844
CD99	1940,786028	-0,058386446	0,173209487	-0,337085728	0,736052276	0,975111879
HS3ST1	5,597749903	0,160196316	0,391769001	0,408905031	0,682609357	0,960974704
AOC1	27,59443707	0,459048663	0,618785825	0,741853877	0,458175874	0,853531417
WNT16	6,009788477	0,23596115	0,621992391	0,379363403	0,704418023	0,966923372
HECW1	11,39151622	-0,416670878	0,640356218	-0,650686081	0,51524915	0,891765725
MAD1L1	91,66466114	-0,055943679	0,186753642	-0,299558703	0,764513789	0,982760189
LASP1	3525,804693	-0,167705374	0,206366539	-0,812657784	0,416414292	0,822810879
SNX11	326,3833116	0,07517591	0,185047975	0,406250917	0,684558245	0,961518784
TMEM176A	13,96662069	0,464868108	0,713220336	0,651787511	0,514538259	0,891469986
M6PR	652,2498048	-0,327479572	0,237073863	-1,381339839	0,167174494	0,565611076
CYP26B1	10,49968785	-0,722216075	0,71019684	-1,016923808	0,309189677	0,730620972
ICA1	37,63367406	-0,232787152	0,27264587	-0,85380773	0,393211531	0,805334896
DBNDD1	6,127830611	-0,731211457	0,564846807	-1,294530568	0,195482218	0,601081564
ALS2	88,99917915	0,328542921	0,128280434	2,561130404	0,010433219	0,183320188
CASP10	569,5390914	-0,351336102	0,205549976	-1,709249055	0,087404826	0,42507628
CFLAR	4861,138476	0,132321732	0,278991407	0,474286049	0,635295939	0,946857675
TFPI	169,062642	0,603492601	0,299051591	2,018021703	0,043589001	0,316790673
NDUFAF7	132,4310963	-0,061540795	0,160409614	-0,383647798	0,701239509	0,965997791
RBM5	955,6252769	-0,101561013	0,160205591	-0,633941752	0,526118837	0,896007733
ARF5	1041,738792	0,083363107	0,142978534	0,583046313	0,559862124	0,912914044
SARM1	29,63856992	-0,700701515	0,404784063	-1,731050154	0,08344282	0,414803189
PLXND1	115,2289531	0,009468728	0,276725752	0,034217012	0,972704101	0,999884338
AK2	648,0932538	0,037472691	0,247076674	0,151664222	0,879451778	0,99845712
CD38	921,4290939	-1,38679431	0,435456599	-3,184690076	0,001449091	0,081402142
FKBP4	191,4635311	-0,29952007	0,299326286	-1,0006474	0,316997305	0,737554585
KDM1A	43,46839431	-0,549642724	0,317158413	-1,733022683	0,083091637	0,414206393
RBM6	456,9914181	0,213942715	0,173475129	1,233276007	0,217472806	0,63143814
CAMKK1	62,73211169	0,70530585	0,280847982	2,511343846	0,012027248	0,196388986
RECQL	94,29487962	-0,396112395	0,272206528	-1,455190652	0,145616488	0,531933571
CCDC132	66,76985775	0,31253198	0,268224734	1,165187025	0,243943296	0,663474015
HSPB6	264,458502	0,000990374	0,536314192	0,001846631	0,998526603	0,999884338
ARHGAP33	24,43806969	-0,186774887	0,261868225	-0,713239978	0,475697272	0,865072531
NDUFAB1	369,0460408	-0,130880174	0,220832361	-0,592667547	0,553403664	0,910627217
PDK4	530,9915976	-0,101624757	0,373194356	-0,272310542	0,785383251	0,98651097
SLC22A16	1,433242196	-3,102622908	3,018343455	-1,02792242	0,303986322
ZMYND10	51,23215304	0,047889676	0,524210879	0,091355745	0,927209925	0,999189109
ABCB5	23,0663658	1,273235659	0,310961839	4,094507744	4,23066E-05	0,015032648
SLC25A13	93,69119181	0,777475727	0,289177495	2,688576188	0,007175746	0,156592211
ST7	140,9871154	0,130093814	0,201777415	0,644739228	0,51909619	0,893606784
CDC27	5044,390964	0,219563266	0,378639231	0,579874582	0,561999198	0,913326051
SLC4A1	1828,840738	1,205312546	0,461376376	2,612427962	0,008990164	0,170468939
HCCS	95,97171824	-0,110826835	0,169819756	-0,6526145	0,514004835	0,890738149
DVL2	41,55831751	0,117766752	0,268499212	0,438611164	0,660943306	0,956028171
UPF1	441,3461708	-0,100888589	0,208119161	-0,484763579	0,627844061	0,942299979
SKAP2	2241,416696	0,087383216	0,232933138	0,375142913	0,707554184	0,968061979
SLC25A5	1104,21524	-0,283512749	0,199729904	-1,419480726	0,155758912	0,54974723
CCDC109B	169,1887781	-0,289205005	0,296101664	-0,976708478	0,328713497	0,748985661
POLR2J	303,9101073	0,264527771	0,121961869	2,168938313	0,030087367	0,27815499
DHX33	51,76810802	-0,304608458	0,280413898	-1,086281601	0,277354424	0,697869161
MEOX1	8,12809423	-0,530988461	0,528493192	-1,004721478	0,315030983	0,735872527
THSD7A	1,291361986	0,495856728	0,684202617	0,724722058	0,46862256
LIG3	82,42085839	-0,612087349	0,341671192	-1,791451437	0,073220881	0,39420135
RPAP3	233,1284345	-0,05765846	0,139346233	-0,413778394	0,679036408	0,959739456
ACSM3	19,89403098	-0,197324301	0,257393947	-0,766623702	0,443305279	0,842537765
AC004381.6	15,74125591	0,121905834	0,272968496	0,446593052	0,655168913	0,953823878
CIAPIN1	100,1632608	-0,443080056	0,25638589	-1,728176441	0,083956596	0,416091741
COPZ2	1,540436843	-0,770531907	0,670303003	-1,149527757	0,250338428
PRKAR2B	1604,704579	0,287657369	0,325314338	0,88424436	0,376564317	0,790638241
MSL3	1150,045936	0,162555543	0,205238858	0,792031027	0,428342585	0,831108684
CREBBP	2417,186767	-0,044038464	0,243450347	-0,180893003	0,856451561	0,997196408
BZRAP1	61,46017647	-0,432334526	0,244414231	-1,768859876	0,076917262	0,402888469
MPO	519,5635741	0,631448014	0,548439642	1,151353705	0,249586751	0,669387055
GCFC2	37,49953575	0,182370504	0,267660983	0,681348852	0,495650779	0,878582798
WDR54	32,62758456	-0,038213797	0,257009579	-0,148686275	0,881801192	0,998784579
CROT	29,28133121	-0,197915257	0,269808236	-0,733540458	0,463228861	0,857520636
ABCB4	5,320197482	0,106047051	0,396720725	0,267309076	0,789231199	0,987206421
KMT2E	1494,718624	-0,253090822	0,177644511	-1,424703865	0,154242821	0,54711348
RHBDD2	256,9100939	-0,322315364	0,183514196	-1,756351126	0,079028473	0,406093013
SOX8	2,277534975	-0,197212451	0,489318769	-0,403034717	0,686922685	0,962238135
IBTK	138,3273085	-0,501084176	0,362266534	-1,383192012	0,166605998	0,564928714
ZNF195	47,29741319	0,287155898	0,295482574	0,971820078	0,331140066	0,750691314
FBXL3	868,4280177	0,124163099	0,157692667	0,78737396	0,431062986	0,832870871
ITGAL	1920,969868	-0,13715387	0,174244218	-0,787135848	0,431202346	0,832870871
PDK2	121,1957614	0,111597857	0,200192073	0,557453926	0,57721733	0,919194979
ITGA3	93,21385913	0,0527017	0,40080117	0,131490883	0,895386998	0,999189109
ZFX	106,723472	1,132734374	0,562303273	2,014454528	0,043961834	0,317350922
LAMP2	34,9871707	0,877682272	0,386382158	2,271539343	0,023114348	0,253081837
ITGA2B	1624,196651	-0,170370516	0,424073144	-0,40174795	0,687869532	0,962452868
GDE1	560,4023378	0,46340005	0,244664476	1,894022618	0,058222008	0,358247735
C19orf60	81,71210101	-0,049157757	0,24786366	-0,198325793	0,842790173	0,994764366
CRLF1	14,59068049	-0,166326919	0,680651117	-0,244364425	0,806948591	0,990017231
OSBPL7	19,56849787	-0,315663082	0,333138203	-0,947543931	0,343361682	0,763259444
TMEM98	9,771458484	0,397856395	0,442775738	0,898550577	0,368892094	0,784892122
YBX2	9,875684842	0,070314248	0,525771652	0,133735336	0,893611862	0,999189109
KRT33A	35,99234559	0,169213612	0,700797165	0,241458756	0,809199578	0,990017231
CACNG3	1,220390335	0,769979406	0,721034306	1,067881791	0,285573837
ZNF263	10,07603012	-0,115690567	0,457976476	-0,252612466	0,800567696	0,988461079
CX3CL1	2,644397202	0,414397927	0,60257873	0,687707524	0,491636981	0,876314771
SPATA20	209,6594248	0,009357791	0,393395754	0,023787218	0,981022336	0,999884338
TNFRSF12A	61,55604321	0,261003962	0,265816591	0,981894927	0,326151615	0,74677353
MAP3K9	26,25874378	-0,622400212	0,306080152	-2,033454987	0,042006577	0,312373748
RALA	5,178171953	-0,313698099	0,677951436	-0,462714706	0,643568876	0,950016488
BAIAP2L1	5,421810663	0,330476637	0,732414804	0,451215125	0,65183451	0,953320415
ETV1	1,330977263	1,259872161	0,969341385	1,29971977	0,193697032
AGK	2,648827918	0,950875726	0,516271119	1,841814681	0,065502262	0,378462752
TTC22	29,11601001	-0,372032441	0,247887439	-1,500811988	0,133404197	0,512092908
PHTF2	196,5440828	0,195485976	0,222945053	0,87683478	0,380576385	0,794548603
CCL26	40,76691781	-0,191187822	0,593020039	-0,3223969	0,747152033	0,978422651
FARP2	27,6532266	-0,201080151	0,344694071	-0,58335831	0,559652116	0,912914044
GGCT	54,24978814	-0,112983295	0,251756523	-0,448780013	0,653590358	0,953816733
DBF4	58,7799032	-0,596482112	0,308628184	-1,9326884	0,053274595	0,345523014
TBXA2R	220,9833953	0,574041436	0,291956971	1,966185062	0,049277237	0,333652214
IFRD1	98,70133354	0,379964729	0,311498768	1,219795288	0,222542488	0,63609433
COX10	130,3666337	-0,188172618	0,219388038	-0,857715945	0,391049333	0,803987591
GTF2IRD1	33,27040861	0,784660139	0,308206709	2,545889227	0,010899977	0,18685034
PAF1	388,9296889	-0,455013365	0,208279256	-2,184631221	0,028915897	0,272667023
VPS41	292,9361797	-0,039873639	0,143685615	-0,277506133	0,781391497	0,986293275
ARHGAP44	3,600160892	-0,60692467	0,828826378	-0,732269973	0,464003803	0,857675871
ELAC2	185,4476961	-0,501192229	0,317509676	-1,578510095	0,114448471	0,477981836
SCIN	8,222207336	-1,736027457	0,870948064	-1,993261744	0,046232793	0,326047798
ARSD	73,06728621	-0,058876886	0,207321271	-0,283988643	0,776419084	0,9849868
PNPLA4	14,18690045	-0,03037258	0,389652662	-0,077947832	0,937869551	0,999189109
ADIPOR2	307,6446818	0,006546116	0,201635711	0,032465061	0,974101178	0,999884338
PRSS21	6,591040621	-0,678585968	0,579004871	-1,171986631	0,241202424	0,660667571
MARK4	255,3520008	-0,005717625	0,160772741	-0,035563396	0,971630496	0,999879873
PROM1	7,475256665	0,293385912	0,432116994	0,678950183	0,497169427	0,879438952
CCDC124	358,2590321	0,379180198	0,25317917	1,497675333	0,134217624	0,513028319
CEACAM21	107,5780624	-0,046777662	0,221470513	-0,211213952	0,832720324	0,99220967
PAFAH1B1	743,7945092	-0,101050024	0,146833368	-0,688195232	0,491329846	0,875862835
DNAH9	2,865076012	1,060034859	0,497461313	2,130889039	0,033098285	0,285493819
KIAA0100	384,7586399	-0,336317698	0,253324262	-1,327617396	0,184304535	0,58846885
GAS7	2114,122959	0,159295013	0,261616882	0,608886596	0,54259961	0,905058385
TRAPPC6A	169,1248248	-0,134323925	0,221397097	-0,606710417	0,544043107	0,905538146
MATK	92,04722571	-0,334280771	0,27233699	-1,227452689	0,219652493	0,633621677
CD79B	307,5309516	-0,493898668	0,2855014	-1,72993431	0,083642012	0,415336973
ST7L	3,973668797	0,673413738	0,567749122	1,186111457	0,235578287	0,65413034
TKTL1	28,02931579	-0,495310173	0,457103434	-1,08358445	0,278549089	0,69902666
RPUSD1	46,93081881	-0,32351451	0,26702322	-1,211559468	0,225681058	0,641188405
RHBDF1	213,4106514	0,344975689	0,62227329	0,554379715	0,579319006	0,920439207
LUC7L	174,5662324	0,158493111	0,243333245	0,651341791	0,514825877	0,891765725
CACNA2D2	33,69489717	-0,225524067	0,32840943	-0,686716175	0,492261602	0,876957225
BAIAP3	80,66203852	0,079527438	0,446795749	0,177995065	0,858726851	0,997717542
TSR3	233,6146996	0,096761121	0,165270009	0,585472961	0,558229742	0,912914044
PIGQ	76,98554499	0,384948145	0,172798452	2,227729136	0,025898583	0,262462133
CRAMP1L	44,00840914	-0,136033748	0,351830737	-0,386645433	0,699018718	0,965470855
TEAD3	32,94534109	0,105810211	0,466111667	0,227006141	0,820418967	0,990943318
DNAJC11	191,323269	-0,561725099	0,330944774	-1,697337878	0,0896328	0,429758908
FMO3	2,247771414	1,17001704	0,541852737	2,159289711	0,030827698	0,279903405
MYLIP	239,8951252	0,021328284	0,197522466	0,10797903	0,914012327	0,999189109
E2F2	257,2310065	0,360309341	0,354865258	1,015341268	0,309943179	0,731232777
PSMB1	914,3807295	-0,14764805	0,21993858	-0,671314919	0,502019932	0,881943427
CDK11A	818,6075049	-0,0186799	0,132718148	-0,140748652	0,888068509	0,999189109
NADK	2221,56035	-0,060780844	0,222385651	-0,273312795	0,784612781	0,98651097
DLEC1	3,282595391	0,448247659	0,536183919	0,835996089	0,403157103	0,813029346
CYTH3	30,46465417	-0,188525161	0,296355669	-0,636144947	0,524681952	0,895461083
ADAM22	5,75686786	0,092583162	0,337084206	0,274658855	0,783578345	0,98651097
SYPL1	248,9490865	-0,022146744	0,121287144	-0,182597619	0,855113753	0,996822752
CYB561	29,93750782	0,885243099	0,373585817	2,369584329	0,017808094	0,226774995
SPAG9	1560,366022	-0,053076049	0,254628616	-0,208444949	0,834881563	0,992798467
CELSR3	45,77086587	0,034618052	0,440185682	0,078644202	0,937315628	0,999189109
AASS	111,7750125	0,973670154	0,397307127	2,450673766	0,014258912	0,206309554
PLEKHG6	31,92606055	0,702909862	0,398626549	1,763329273	0,077844971	0,404699762
SS18L2	57,62592903	-0,04834938	0,169430796	-0,28536359	0,775365599	0,984851532
MPND	31,71614992	-0,238395991	0,232995592	-1,023178114	0,306223639	0,726658736
MGST1	428,9625776	0,542855455	0,280505504	1,93527559	0,052956486	0,344857247
CRY1	74,34186804	-0,322856626	0,200065611	-1,613753727	0,106580855	0,460619798
PGLYRP1	831,9019881	0,366304812	0,2991376	1,224536173	0,220750029	0,634345856
NFIX	11,3762387	-0,117156331	0,448105687	-0,261447989	0,793747053	0,987737147
ST3GAL1	314,3708988	-0,033588522	0,154365967	-0,217590205	0,827748417	0,991303244
MMP25	7073,484253	-0,126487481	0,315997512	-0,400279991	0,688950304	0,962452868
IL32	2471,150755	-0,593354204	0,401883726	-1,476432526	0,139827816	0,522277344
PKD1	65,42252589	-0,277394539	0,346868661	-0,799710583	0,4238785	0,828189574
MED24	233,2811852	-0,494113044	0,232093271	-2,128941708	0,033259083	0,285654502
RHOBTB2	71,40187074	-0,43623721	0,274089444	-1,591587051	0,111477521	0,471314043
SEC62	1755,260908	0,268498481	0,169912778	1,580213589	0,114057961	0,477652413
RPS20	2929,604071	0,312570938	0,239301443	1,306180748	0,191491098	0,595950539
CSDE1	27,13961999	0,600776996	0,370475732	1,621636573	0,104881187	0,456949499
UBE3C	229,7630139	-0,067006179	0,157615328	-0,425124767	0,670745724	0,957469923
REV3L	731,6282061	0,78531917	0,420076139	1,869468647	0,061557642	0,368923258
TENM1	138,8233631	0,349946667	0,491058637	0,71263723	0,476070268	0,865270145
IYD	20,63489279	0,689778569	0,347780016	1,983376092	0,047325436	0,328087192
FAM76A	88,20360312	0,141776467	0,160933381	0,880963698	0,378337469	0,792100157
POMT2	27,70187627	0,661022065	0,235582636	2,805903167	0,005017577	0,132064884
VTA1	167,5524268	0,030122643	0,127862223	0,235586733	0,81375337	0,990774567
MLXIPL	33,82874092	0,552505858	0,372634812	1,482700597	0,138153976	0,519412134
BAZ1B	172,6158654	-0,238720716	0,222440675	-1,073188239	0,283186666	0,702806873
RANBP9	397,1677489	0,173926463	0,111136352	1,564982645	0,117586979	0,483205008
ETV7	74,69990653	-0,635914345	0,604434491	-1,052081499	0,292762159	0,713348332
SPRTN	109,1629738	-0,173158014	0,161863381	-1,069778805	0,284718885	0,70409451
DYRK4	8,613386687	0,217111666	0,374305391	0,580038844	0,561888423	0,913326051
ZNF207	1023,622932	-0,178795754	0,130184943	-1,373398106	0,169628618	0,56850108
UQCRC1	133,2330099	-0,493146815	0,3611762	-1,365391226	0,17213012	0,571042778
STARD3NL	298,8941094	0,133200172	0,180022136	0,739909962	0,459354629	0,854190811
CD9	589,5417579	0,621382302	0,289698516	2,144927457	0,031958648	0,282516884
HHATL	8,92766656	0,346098254	0,634660954	0,545327788	0,585528096	0,922509944
NCAPD2	592,8639119	-0,779254783	0,269051761	-2,896300627	0,003775905	0,12129167
IFFO1	142,8308069	-0,031880484	0,244900557	-0,130177263	0,896426183	0,999189109
GIPR	15,6697061	-0,196145243	0,370574318	-0,529300693	0,596596875	0,928367233
PHF7	15,6464036	1,061716773	0,322361071	3,293563859	0,000989259	0,072184969
SEMA3G	41,65130704	0,220619128	0,467282638	0,472132088	0,63683251	0,947040237
NISCH	176,3462316	-0,480675549	0,238181015	-2,018110251	0,04357978	0,316790673
STAB1	391,6717969	0,096266454	0,40180156	0,239587058	0,810650399	0,990017231
FUZ	61,73881192	-0,117601009	0,170034856	-0,691628835	0,489170449	0,874238786
SLC6A13	1,547601807	0,139686479	0,66799858	0,20911194	0,834360854
IDS	2651,006215	-0,040335087	0,194065431	-0,20784272	0,835351775	0,992798467
ZNF200	137,9377214	-0,249005639	0,208277745	-1,195546067	0,231873749	0,649747373
CD4	433,2029022	-0,291090134	0,452389896	-0,643449681	0,519932355	0,893606784
LRRC23	11,64484548	0,281062436	0,279715444	1,004815578	0,314985661	0,735872527
BTK	396,8140247	0,032573349	0,124647016	0,261324741	0,793842089	0,987737147
HFE	201,5732307	0,290086462	0,23433102	1,237934536	0,215740335	0,629984348
SCMH1	72,48067189	-0,091564274	0,256736294	-0,356647175	0,721355956	0,971732498
FYN	818,5777893	-0,517534814	0,296516953	-1,745380187	0,080918712	0,410589868
HIVEP2	155,417491	-0,584223128	0,252660201	-2,312287913	0,020761822	0,242394276
TCEB3	238,4862014	-0,365200966	0,223140808	-1,636639075	0,101705906	0,452842014
LYPLA2	317,9451544	-0,099747122	0,172072403	-0,579681116	0,56212968	0,913411833
CLCN6	109,1373153	0,233878333	0,257317671	0,908908943	0,363398193	0,781259819
MRC2	63,53580034	0,035036447	0,487378793	0,071887509	0,942691431	0,999189109
TSPAN9	140,7306289	-0,030039232	0,349448063	-0,085961936	0,931496676	0,999189109
BTBD7	259,300396	-0,14818944	0,155647737	-0,952082207	0,341055292	0,761351458
APBA3	135,3256823	-0,397480138	0,175732229	-2,261851111	0,023706604	0,255280819
MKS1	25,07702413	-0,359755578	0,325785233	-1,104272207	0,269475075	0,689841321
ABHD5	1220,503913	-0,152635728	0,294138625	-0,518924463	0,603813418	0,931712372
KAL1	5,747297627	-0,898437391	0,607348955	-1,479277084	0,139066275	0,52074187
AKAP8L	349,3852828	-0,261184385	0,129673006	-2,014176985	0,043990955	0,317350922
MBTD1	359,5377878	0,108938698	0,192883296	0,564790732	0,572216111	0,916315433
UTP18	172,08525	-0,195264209	0,207834493	-0,939517814	0,34746495	0,766937297
RNF216	719,196748	-0,17573612	0,111898577	-1,570494684	0,11630007	0,480274039
TTC19	121,5676759	-0,071367541	0,222215938	-0,321163016	0,748086858	0,978422651
PTBP1	948,4375878	-0,414967036	0,254487981	-1,63059581	0,102975634	0,454165336
DPF1	16,59978774	0,454342642	0,568230505	0,799574536	0,423957346	0,828189574
LARS2	45,40785731	-0,455416764	0,311195026	-1,46344487	0,143345688	0,528294313
PIK3C2A	6,661790351	0,865714006	0,444253094	1,948695504	0,051331799	0,341341845
PLAUR	983,3037236	-0,208738408	0,212204284	-0,983667271	0,325279137	0,746033914
ANLN	135,100753	0,296075578	0,208716313	1,41855504	0,156028781	0,550225357
WIZ	109,202967	-0,220389725	0,27364795	-0,805376853	0,420602245	0,826244563
RABGAP1	406,0110484	-0,026539879	0,126232059	-0,210246739	0,833475102	0,992434657
DCN	19,5526392	0,841366835	0,430327021	1,955180114	0,050561815	0,338979846
QPCTL	151,9327442	0,310213711	0,227785735	1,361866276	0,173240091	0,572736506
PPP5C	184,6934092	-0,630673546	0,263015668	-2,39785543	0,016491373	0,219819486
CEP68	120,9277962	0,183452182	0,152748384	1,201008983	0,229747717	0,646458429
ZBTB32	1,662531277	0,842955319	1,020814675	0,825767242	0,40893614
TYROBP	13253,84221	0,057934422	0,185025707	0,313115527	0,754192893	0,979900782
TMEM159	65,58438001	0,212969852	0,249526797	0,853494916	0,393384906	0,805334896
BRCA1	66,48328206	-0,194843061	0,129022969	-1,510142434	0,131007084	0,507780598
ERCC1	35,58930795	0,267219541	0,233691446	1,143471641	0,252842823	0,672711312
CD22	141,3708412	-0,325197067	0,255125563	-1,274654969	0,202431392	0,611638723
MBTPS2	228,1246016	-0,09962723	0,327227288	-0,304458807	0,760778371	0,981318293
PRICKLE3	30,81031959	-0,355729003	0,341293689	-1,042295872	0,297274526	0,718473173
LTF	1982,235793	-0,493204596	0,565737241	-0,87179093	0,383322443	0,797774495
EXTL3	140,1539481	0,309891035	0,151583747	2,044355292	0,040918461	0,309952416
ALOX5	2056,326863	-0,174297625	0,256283535	-0,680096852	0,496443138	0,879128897
KDM5D	374,5707003	-0,022446487	0,729440122	-0,030772213	0,975451201	0,999884338
CALCOCO1	602,3092344	0,049388761	0,13789158	0,35817097	0,720215371	0,971589065
UBR7	165,2484957	-0,109972122	0,272199864	-0,404012407	0,686203595	0,962003411
MAP4K5	186,6891369	0,639424578	0,243712154	2,623687684	0,008698351	0,167711352
EHD3	181,6914948	0,276875383	0,309879598	0,893493425	0,371592992	0,786645181
PSMC4	313,0785525	-0,507191917	0,223204096	-2,272323516	0,023066977	0,253081837
MAN2B2	400,5538881	-0,406884365	0,189403547	-2,148240471	0,031694657	0,282516884
SLC7A14	37,5747612	1,563234802	0,502855637	3,108714885	0,001879029	0,092370901
CLDN11	1,752013573	-0,979401142	0,71441144	-1,370920294	0,170399804	0,568826931
SLC25A39	5297,672212	1,56504165	0,44611016	3,508195488	0,000451157	0,048217147
MVP	573,8705299	-0,375910273	0,286353715	-1,312748024	0,189267869	0,594523376
NUB1	1041,343147	-0,53358675	0,298196639	-1,789378819	0,073553828	0,394792155
PGM3	39,94063076	0,061405702	0,486801586	0,126141129	0,899620211	0,999189109
RWDD2A	19,31616601	-0,355127452	0,266652969	-1,331796352	0,182927117	0,587375854
CLK1	5512,039335	0,612041157	0,297114938	2,059947445	0,039403565	0,305552354
POLR3B	26,69772841	-0,51473269	0,306618117	-1,678741933	0,09320235	0,435087938
ANGEL1	49,47979583	-0,127627882	0,373098244	-0,342075803	0,732293846	0,974469398
RNF14	365,773958	0,998591918	0,282921437	3,529573181	0,000416231	0,045968167
DNASE1L1	271,5886972	-0,119680904	0,159816679	-0,748863661	0,453939385	0,850339411
DDX11	41,52451923	-0,454664454	0,317329228	-1,432784673	0,151919383	0,543115117
HEBP1	199,4695222	0,640218608	0,220212721	2,907273499	0,003645943	0,120135785
GPRC5A	4,918945937	0,685439742	0,496576714	1,380330011	0,167485059	0,566075948
MAMLD1	3,312951837	1,339462894	0,554436831	2,415898114	0,015696453	0,215776721
CD6	190,5999317	-0,420528721	0,349128199	-1,2045109	0,228392172	0,644202529
TACC3	377,0567058	-0,070866226	0,155031438	-0,457108743	0,647592886	0,951289696
UFL1	238,2394245	-0,292396247	0,307920606	-0,94958324	0,342324058	0,76200378
POLA2	200,3125544	-0,496357757	0,223575672	-2,220088403	0,026412767	0,263563298
ZC3H3	110,4244561	-0,181677765	0,223442358	-0,813085606	0,416168979	0,822761726
CAPN1	467,2458022	-0,289550671	0,271722334	-1,065612337	0,28659892	0,706128934
ACPP	259,1325019	0,229355705	0,249956668	0,917581864	0,358837816	0,777878529
MDH1	579,0692422	-0,323391484	0,2399493	-1,347749225	0,177739054	0,579060162
SLC30A9	215,1070866	-0,070449629	0,152671866	-0,461444739	0,64447956	0,950037735
MTMR11	58,99090535	-0,237451738	0,567328839	-0,418543395	0,675549866	0,95832573
COX15	374,148569	-0,306349324	0,135460257	-2,261543942	0,023725595	0,255280819
CCDC88C	278,1186714	-0,555583273	0,362542149	-1,532465325	0,125407648	0,498277683
YAF2	37,61464317	-0,165027855	0,230283447	-0,716629256	0,473602888	0,863354411
ZMYND11	382,3418169	0,208097674	0,175356859	1,186709631	0,235342175	0,653750484
WAS	3990,043565	-0,059963035	0,203641777	-0,294453504	0,768411388	0,983887033
BID	224,7532025	0,114670504	0,222642055	0,515044219	0,60652212	0,932596931
MATR3	1566,04614	-0,412462365	0,196231574	-2,101916404	0,035560599	0,293851363
NPC1L1	9,489638844	-0,085425865	0,589963569	-0,144798543	0,884869933	0,998826063
XYLT2	226,7024046	-0,20895835	0,151446171	-1,37975327	0,167662625	0,566324779
RGPD5	131,3450879	0,019441464	0,405647648	0,047926972	0,961774443	0,999866967
NUDCD3	297,3121195	-0,397649319	0,250247885	-1,589021699	0,112055494	0,472978368
CHDH	71,80868948	0,848505748	0,278689804	3,04462429	0,002329711	0,097163209
GLT8D1	169,0708016	-0,074121374	0,170247122	-0,435375194	0,663290113	0,956626579
ATP2C1	7,940979252	-0,149095503	0,700677641	-0,212787585	0,831492648	0,99220967
IGF1	11,8946633	0,388240753	0,620325947	0,625865732	0,531403013	0,898565269
RALBP1	449,5792997	0,481835588	0,271200757	1,776674939	0,075621738	0,400645397
RUFY3	78,88496241	0,017965882	0,257710472	0,069713433	0,94442175	0,999189109
CNTN1	1,145188019	0,788855618	0,780582199	1,010599036	0,312208377
SLC11A1	1827,015263	0,027484319	0,309187223	0,088892158	0,929167616	0,999189109
WWTR1	7,340398661	-0,560958155	0,528722671	-1,060968606	0,288704169	0,708213352
AGPS	428,0099461	0,056768657	0,143412759	0,395841049	0,692222292	0,963244455
CXorf56	73,24948917	-0,04221276	0,136375438	-0,309533453	0,756915769	0,979950684
ATP1A2	5,679164471	-1,312181473	0,783575292	-1,674608026	0,094011163	0,436537632
TTC27	11,58560705	-0,427720574	0,295194419	-1,448945327	0,147352852	0,535037392
ZNF582	28,33022359	0,064221431	0,206492955	0,311010275	0,75579281	0,979950684
PHLDB1	11,76431745	0,536250456	0,40015553	1,340105073	0,180211187	0,582625903
MARCO	19,19298437	0,131137164	0,547555336	0,239495729	0,810721208	0,990017231
CYP24A1	21,16027	0,437790608	0,605024403	0,723591652	0,469316468	0,860071496
SYT13	2,214135354	0,616348549	0,598254339	1,030245013	0,302895004	0,724015625
CD74	809,4050158	-0,431765201	0,345327619	-1,250306021	0,21118778	0,623305211
HGF	99,23967676	0,353968581	0,303001355	1,168207916	0,242722908	0,662764105
ZRANB1	530,1655134	0,523087609	0,197627795	2,646832182	0,008124966	0,162947943
NCDN	33,34681653	-0,313118758	0,359909901	-0,869992066	0,38430474	0,798890189
GPR124	11,5236472	-0,566838553	0,41469567	-1,366878395	0,171663425	0,570322279
ZFP64	79,92464736	-0,893366005	0,323522651	-2,761370811	0,005755928	0,140426098
MNAT1	41,79775178	-0,238780432	0,290518339	-0,821911736	0,411127133	0,817861229
SAMD4A	6,469000345	0,215544091	0,359966822	0,598788771	0,549313751	0,90855652
RUNX3	328,0323197	-0,779425273	0,445930435	-1,747862922	0,080487767	0,409453018
MRE11A	161,5343829	-0,188838715	0,17605585	-1,072606877	0,283447538	0,703134012
PLEKHB1	68,66209483	-0,688761298	0,441588907	-1,55973415	0,118822718	0,485660748
SERPINB1	3241,268946	-0,07820961	0,23086853	-0,338762541	0,734788622	0,974995577
CYP3A43	9,296191719	1,072030573	0,430194481	2,491967286	0,012703774	0,198132807
SLC7A9	7,068582831	0,11858507	0,646596696	0,183398819	0,854485103	0,996822752
SPAST	1163,970517	0,73308351	0,23059279	3,17912589	0,001477199	0,081650916
OSBPL5	149,0612343	-0,4878035	0,334312602	-1,459123876	0,144531016	0,53030549
AQR	507,1402109	-0,338012367	0,174079372	-1,941714079	0,052171723	0,34391025
CPS1	20,32206903	0,941037651	0,298699889	3,150445267	0,001630218	0,086930338
RTFDC1	433,8152497	0,10500501	0,158205896	0,663723751	0,506867135	0,885918953
GABRA1	104,8484754	0,297958905	0,635306929	0,468999929	0,639069687	0,948137252
NLRP2	30,09196032	-0,736230124	0,408106973	-1,804012607	0,071229331	0,389509338
SLC45A4	220,6582817	-0,115417418	0,274703029	-0,420153424	0,674373377	0,958142435
RNF10	2868,387655	0,644036221	0,281295078	2,289539599	0,02204802	0,248236269
ZNF839	129,0691398	-0,149748305	0,187445915	-0,798888068	0,424355318	0,828189574
ZDHHC6	297,8149958	-0,168721816	0,111873066	-1,508154041	0,131515107	0,508904929
GRAMD1B	118,6062307	-0,971303899	0,364170504	-2,667167956	0,007649343	0,15982193
RNH1	570,4964381	-0,379250314	0,341213124	-1,11147634	0,266363369	0,686905279
NDUFS1	338,3276202	-0,242694304	0,17804628	-1,363096743	0,172852023	0,571970071
ERP44	2254,229445	-0,093274743	0,149572317	-0,623609668	0,53288396	0,899213135
ALAS1	156,2900122	-0,135732403	0,211581464	-0,641513676	0,521188999	0,893896556
BIRC3	387,4122607	-0,279308167	0,244150855	-1,143998317	0,252624335	0,672514984
AKAP11	244,2874317	-0,359813639	0,28760609	-1,251064045	0,210911112	0,622703769
GLRX2	83,33299186	-0,032547754	0,179406892	-0,181418637	0,856038992	0,996964609
SNAPC1	63,59001726	0,293480399	0,177399639	1,654346091	0,098057213	0,444712861
DERA	244,2905558	0,440938253	0,154191165	2,859685593	0,004240612	0,125381303
STRAP	14,8511576	0,550974612	1,308889568	0,420948127	0,673792961	0,958142435
ABCC2	23,53192481	0,038728679	0,377940318	0,102473003	0,918381241	0,999189109
DEF6	1693,83875	-0,047820903	0,171994847	-0,278036833	0,780984084	0,986293275
PLEKHO1	270,1308365	0,018969743	0,229224431	0,082756201	0,934045396	0,999189109
GCLM	285,9420002	-0,021012347	0,164537687	-0,127705375	0,898382136	0,999189109
UBR2	4,710906035	0,879061695	0,500959706	1,754755292	0,079301174	0,406580203
EHD2	17,86657987	0,423332655	0,469907935	0,900884244	0,367649869	0,783444235
DEPDC1	17,52624851	-0,07088384	0,418062265	-0,169553308	0,865361445	0,997948431
CCDC28A	405,8176733	-0,076820955	0,176914103	-0,434227421	0,664123302	0,956717066
RRAGD	445,6275687	0,099525883	0,20280852	0,490738175	0,623611642	0,940549933
HSF2	35,59608982	-0,425587096	0,276954189	-1,536669646	0,124374228	0,495828476
PHF20	413,8840598	0,042077863	0,127788566	0,329277215	0,741946165	0,977587881
HSD17B6	1,418600421	0,72447463	0,747933574	0,968634989	0,332727339
NR1H3	6,14944668	0,657109045	0,400874525	1,639188832	0,101173939	0,451368576
TYMP	3814,326552	-0,437060954	0,278153025	-1,571296783	0,116113728	0,480274039
NCAPH2	78,86799846	-0,462274397	0,276943719	-1,669199786	0,095077793	0,438568755
TOMM34	84,02858438	-0,470929146	0,2528646	-1,862376725	0,062550008	0,371504315
SEC63	340,5252723	-0,381101587	0,248857802	-1,531403012	0,12566982	0,498803597
KPNA6	1054,917118	-0,244689901	0,214111792	-1,142813753	0,253115927	0,672711312
VIM	6678,046123	-0,36533638	0,266475762	-1,370992912	0,170377166	0,568826931
RTEL1-TNFRSF6B	3,13811742	-0,349110692	0,84115117	-0,415039181	0,678113221	0,959716045
FAS	714,3220044	-0,263068928	0,273496215	-0,961874111	0,336112845	0,756508462
RNASET2	2451,518457	-0,30038104	0,230796371	-1,301498107	0,193088012	0,598184905
CD44	11,70060785	-0,011750595	0,295679129	-0,039741037	0,968299585	0,999866967
KCNG1	5,386240138	0,297227741	0,416084843	0,714344072	0,475014446	0,864586627
SLAMF7	975,8753388	-0,757756823	0,338627687	-2,237728491	0,025238766	0,261508636
BTN3A1	390,5728822	-0,032458061	0,296488864	-0,109474806	0,912825904	0,999189109
MIPEP	22,46419941	-0,125729639	0,198737812	-0,632640754	0,526968267	0,896175756
PRKCH	131,0086029	-0,604552182	0,389850218	-1,550729367	0,120966554	0,488800574
INSRR	1,213232446	-0,442965649	0,769636591	-0,575551701	0,564918235
IFNGR1	1577,627622	0,337558683	0,198775915	1,698187042	0,089472465	0,429758908
B4GALT7	18,52698132	-0,76923313	0,418184823	-1,839457309	0,065847952	0,378517268
SH2D2A	33,67130545	-0,893708169	0,524414288	-1,704202555	0,088343252	0,426591489
VRK2	476,8684569	-0,034922064	0,142964183	-0,244271419	0,807020618	0,990017231
TNFRSF1B	4250,231805	-0,179019501	0,214667392	-0,833938957	0,404315383	0,813765247
VEZT	132,9958911	-0,00926436	0,216052322	-0,042880171	0,965797056	0,999866967
POU2F2	160,7719188	-0,139051923	0,322807518	-0,430758007	0,666644336	0,957327506
BRD9	107,8701288	0,031508958	0,186201054	0,169220085	0,865623532	0,997948431
SNX1	775,1483049	-0,346749756	0,173900975	-1,993949467	0,046157577	0,326033475
TBPL1	263,3076495	0,296337451	0,211238745	1,402855575	0,160659911	0,558364073
ARNTL2	41,22006195	0,093974146	0,268457291	0,350052502	0,726299297	0,972669449
BCLAF1	704,0250106	-0,291873193	0,121025043	-2,411676006	0,015879385	0,216159207
SLC39A9	311,6435546	-0,30545298	0,137182103	-2,226624127	0,025972405	0,262694056
ANK1	405,4523163	0,670837755	0,31118788	2,15573227	0,031104577	0,280646058
TFB1M	27,98919975	-0,372679535	0,211618224	-1,76109377	0,078222533	0,405373275
RABEP1	178,8577674	0,317360179	0,213774292	1,484557267	0,137661142	0,518530403
HMGB3	67,14194427	-0,702957432	0,353602943	-1,987985245	0,046813322	0,326915665
NUP160	117,4125491	-0,231754192	0,255661801	-0,906487364	0,36467795	0,78182858
BAK1	524,9664763	-0,426227411	0,254746444	-1,673143714	0,094299008	0,437253129
GRN	3784,662498	-0,3481327	0,315359119	-1,103924635	0,269625831	0,689930068
FAM13B	896,5225591	0,428059311	0,247278789	1,731079777	0,083437537	0,414803189
ARHGAP31	123,4012345	-0,250680441	0,310694364	-0,806839357	0,419759041	0,825486315
CENPQ	45,84963497	0,285930341	0,301575286	0,948122587	0,343067051	0,762811991
SARS	171,0059274	-0,190675686	0,283490787	-0,672599233	0,50120229	0,881943427
RANBP3	636,0306234	-0,185058704	0,175098534	-1,056883228	0,290564884	0,710438748
ARID4A	2631,457031	0,67059922	0,310493148	2,159787502	0,030789124	0,279903405
TSSC1	80,32950637	-0,493272505	0,276564442	-1,783571679	0,074493291	0,397516435
PNPLA6	623,1551784	0,080735663	0,289558839	0,278822997	0,780380665	0,986293275
IFT88	9,996847748	0,034480193	0,329524501	0,104636205	0,916664485	0,999189109
ALG1	94,15158294	-0,730122518	0,255449248	-2,85819012	0,00426065	0,125593678
ZCCHC8	152,5246261	-0,362560641	0,127845308	-2,835932315	0,004569213	0,128339684
ABCF2	207,309546	-0,52800494	0,285365627	-1,850275188	0,064273897	0,37587007
CHPF2	224,5057156	-0,189098839	0,256767319	-0,73645992	0,461450851	0,856216841
LRRC7	3,707347222	-1,207488646	0,648104078	-1,863109161	0,06244691	0,371161722
FUT8	1875,948735	0,939802596	0,367446032	2,55766157	0,010537859	0,184018492
UBA6	145,992358	-0,189777892	0,180623817	-1,050680336	0,29340543	0,714349413
GAB2	570,7542409	0,058713633	0,223609983	0,262571609	0,792880785	0,987737147
ATP6V0A1	352,3214273	-0,15479765	0,220516696	-0,701977007	0,482693503	0,870116615
PIAS1	2053,022219	0,108843927	0,178664798	0,609207454	0,54238694	0,904993317
SLC4A7	91,10593489	-0,515251735	0,319168827	-1,614354822	0,106450485	0,460421587
APBA2	30,67744626	-0,513623632	0,373083455	-1,376699031	0,168605318	0,567866048
MAP2K3	1505,938168	0,9253971	0,270251421	3,424208086	0,000616594	0,057377851
TMSB10	9920,409079	-0,086563994	0,199713897	-0,433440014	0,664695136	0,956966617
ASTE1	67,59637463	-0,245680717	0,185329206	-1,325644901	0,184957346	0,589303669
RNF19A	20,6642037	-0,232558897	0,369548251	-0,629305907	0,529148805	0,897937833
PEX3	98,37052673	-0,432641457	0,193937878	-2,230824949	0,025692727	0,262444945
GABARAPL2	2579,342536	1,284704497	0,338834867	3,791535703	0,000149719	0,030216526
SH3YL1	59,25918945	-0,224217124	0,339674769	-0,660093551	0,509193797	0,88616472
FAM136A	77,81417636	-0,488831289	0,276993029	-1,764778312	0,077601031	0,404672073
VCL	154,7680985	0,731300449	0,462483687	1,581245933	0,113821817	0,477030152
DEPDC1B	29,46544406	-0,620389516	0,325924246	-1,903477644	0,056978248	0,356005148
DAPK2	164,3090728	0,605243311	0,276848548	2,186189219	0,028801765	0,272591108
NSMAF	822,6008275	0,1529312	0,256138974	0,597063372	0,550465071	0,909050875
ADSS	279,0911187	0,067709814	0,166724725	0,406117415	0,68465633	0,961518784
STAP1	177,541235	-0,277078923	0,361153651	-0,7672051	0,442959581	0,842272493
TIMP2	1611,71394	-0,067102436	0,202168784	-0,331912941	0,739954998	0,97654941
RFC1	354,7725415	-0,315072191	0,18150978	-1,735841402	0,082591881	0,413403819
TBC1D23	562,2038633	0,112510422	0,135448093	0,830653426	0,406169444	0,814770682
CUL3	645,64588	-0,143486633	0,145859782	-0,983729925	0,325248322	0,746033914
CYP46A1	108,585749	0,725313233	0,402406401	1,802439602	0,071476269	0,390064775
ZZZ3	129,4235732	0,394719517	0,176870833	2,231682348	0,025635965	0,262153128
TUBG2	45,00737371	0,320542084	0,259827233	1,23367393	0,217324432	0,63133243
RPL26L1	355,2142045	0,039241732	0,266195836	0,147416775	0,882803066	0,998784579
FLT4	9,210627402	-0,0076349	0,472877224	-0,016145628	0,987118213	0,999884338
NSUN2	417,9551259	-0,305608489	0,232411963	-1,314943024	0,188529052	0,594229415
FBXO42	339,1346099	0,003110142	0,127281447	0,024435154	0,980505508	0,999884338
MFAP3	208,3408206	-0,272714354	0,171772967	-1,587644192	0,112366819	0,473725989
MRI1	428,772454	0,142486869	0,365847006	0,389471192	0,696927618	0,964708834
METTL1	52,87257661	-0,333612328	0,306568458	-1,088214784	0,2765003	0,69716937
AGA	99,86036304	-0,357710462	0,228350792	-1,566495389	0,117232687	0,482662034
BOD1L1	616,4544635	-0,119965607	0,172226902	-0,696555561	0,486080975	0,872695684
MAT2B	1067,750076	-0,04780122	0,136970651	-0,348988778	0,727097735	0,973102977
EDC4	112,2513477	-0,385131921	0,270455774	-1,424010719	0,154443369	0,547349711
TRIO	122,0308682	0,055513367	0,304070862	0,182567202	0,855137621	0,996822752
VCAN	1807,153375	-0,391196014	0,503475323	-0,776991435	0,437163824	0,837782002
CLEC16A	1054,67344	0,442956358	0,252891521	1,751566665	0,079848349	0,407655777
MSR1	7,624165276	1,007547742	0,444643739	2,265966333	0,023453445	0,254715318
CDH1	40,66000206	1,109608406	0,389526393	2,848609047	0,00439108	0,126137445
SKIV2L2	242,9364462	0,478876504	0,182319705	2,626575679	0,008624881	0,16683276
ZFYVE16	687,4590256	-0,202073125	0,212298182	-0,951836341	0,341179988	0,76141274
FAM65A	1,906739328	1,475791758	0,77606259	1,901640122	0,057218219	0,356773436
PNKP	341,3551706	0,024239581	0,244568393	0,099111665	0,92104961	0,999189109
BEST2	5,951652116	-0,024689709	0,446848758	-0,055252943	0,955936951	0,999189109
PHLPP2	3,58306024	0,950109854	0,481258277	1,97422029	0,0483567	0,331122857
SPDL1	108,856588	0,171105866	0,234776975	0,728801733	0,466122951	0,858260633
STAU2	699,904015	0,183796032	0,337464388	0,544638305	0,586002304	0,922509944
PQLC2	127,1091298	0,395353555	0,200543896	1,971406571	0,04867739	0,332205403
CTNS	74,50559721	0,331215361	0,231887279	1,4283464	0,153192179	0,545092958
RTN4R	2,074188647	0,264165705	0,652823813	0,404650841	0,685734181	0,962003411
PHF23	481,6974051	-0,025737358	0,183417803	-0,140320939	0,888406421	0,999189109
INPP4A	315,9474899	-0,367722618	0,155182735	-2,369610367	0,01780684	0,226774995
RAB27B	531,764948	0,485282896	0,365981248	1,325977487	0,184847155	0,589195073
PSMA4	590,7207809	0,013724202	0,234013011	0,058647175	0,953233135	0,999189109
LSG1	43,85470003	-0,497977969	0,349088941	-1,42650743	0,153721924	0,545919162
PARP3	58,78120466	-0,066884272	0,251102901	-0,266362005	0,789960424	0,987357979
THAP3	37,39086534	-0,135227244	0,171280301	-0,789508444	0,429814897	0,832483053
FAM65C	43,10707547	0,39278788	0,256668304	1,530332627	0,125934416	0,499489937
TDP1	57,23676333	-0,306095564	0,284000142	-1,077800744	0,281122688	0,701675894
AIFM2	13,97809547	0,093558777	0,299457599	0,312427459	0,754715685	0,979900782
C2orf83	4,781390001	0,305003807	0,448774948	0,679636437	0,496734692	0,879359747
SPATA7	83,91837047	1,208015179	0,372291954	3,244806035	0,001175307	0,076247326
MED17	248,206987	-0,010799798	0,136882172	-0,078898501	0,937113356	0,999189109
CAPG	883,4603754	-0,293632438	0,24949805	-1,176892718	0,239238329	0,658195478
AP2S1	586,7678727	0,080520977	0,217289613	0,370569842	0,710957948	0,968437088
TG	18,96913184	0,182904587	0,461082775	0,396684927	0,691599817	0,963179254
ADAM28	32,2951938	0,501731494	0,434049006	1,155932827	0,247708634	0,667015083
BARX2	4,588481778	0,342972337	0,377253082	0,909130642	0,36328117	0,781259819
DCUN1D1	1981,338871	0,90129727	0,32552843	2,768720596	0,005627687	0,139590536
JADE2	22,58727678	-0,086589503	0,344956887	-0,251015434	0,801802176	0,989165716
ZIC2	34,49403691	0,023151563	0,596846056	0,03878984	0,969057946	0,999866967
LCP2	1700,806594	-0,354392182	0,231180936	-1,532964564	0,125284586	0,498277683
TRIT1	37,66658797	0,031156176	0,30406124	0,102466781	0,918386179	0,999189109
ADRB1	127,6667391	-0,039364259	0,564741641	-0,069703129	0,944429951	0,999189109
CUL7	40,70474916	-0,137843125	0,251561125	-0,547950822	0,583725671	0,922003032
CTNNA1	1038,360824	-0,365809974	0,231543622	-1,579874972	0,114135502	0,477754331
PHKA2	121,0949586	-0,192172742	0,264725213	-0,725932904	0,467879904	0,859172793
CNTLN	32,23584984	0,510468577	0,480447643	1,06248534	0,28801541	0,70716311
HSPA5	2703,361973	-1,06992336	0,364873856	-2,932310279	0,003364504	0,115634616
DSG2	16,22479979	0,799109064	0,31698928	2,520934035	0,011704379	0,194211445
GEMIN8	56,29729742	-0,068718596	0,232647922	-0,295375927	0,767706721	0,983887033
OFD1	170,7921012	0,104105451	0,167227739	0,622536974	0,53358884	0,899250505
PREX2	2,591382117	0,50768537	0,547288467	0,927637618	0,353595577	0,772869713
WDR37	55,88963481	-0,66227912	0,35879898	-1,845822192	0,064918027	0,377610375
YTHDC2	52,10388824	-0,013671229	0,229093018	-0,059675451	0,952414124	0,999189109
CTPS2	77,21814823	0,0285187	0,211928087	0,134567819	0,892953587	0,999189109
ATP6V1H	284,0278557	-0,199017737	0,192114196	-1,035934566	0,30023267	0,721637863
POLR2B	691,2240401	-0,3140648	0,147343777	-2,131510449	0,033047113	0,285493819
FAM214A	402,1719232	-0,210226068	0,207963567	-1,010879313	0,312074196	0,733291323
ARAP2	422,296526	-0,063960678	0,20335754	-0,314523268	0,753123647	0,979387563
TPR	1418,246596	-0,0997186	0,181217917	-0,550268991	0,582134889	0,92154913
KIAA0556	196,7212598	-0,169623639	0,181780601	-0,933122886	0,350756524	0,769933289
DTNBP1	652,2770851	-0,120402241	0,246980351	-0,487497246	0,625905994	0,941843628
XK	85,99790913	0,536195951	0,336462101	1,593629565	0,111019029	0,470470838
ANO2	26,13010765	0,663206803	0,370522906	1,789921197	0,073466581	0,394792155
C12orf4	1314,532502	0,475880962	0,565386511	0,841691398	0,399960715	0,811399544
WWC3	741,0056073	-0,105788869	0,216135543	-0,489456141	0,624518798	0,941414715
ARHGAP6	178,408723	-0,055754009	0,326608299	-0,170706039	0,864454914	0,997948431
MAP4	5,522939003	1,127468075	0,411922662	2,737086784	0,006198594	0,144119511
GOPC	166,5481913	-0,394293243	0,203980157	-1,932998038	0,05323644	0,345523014
USP28	193,838208	-0,122867591	0,198306022	-0,619585779	0,535530532	0,900817798
HDAC9	23,13362655	-0,556153884	0,435568778	-1,276845154	0,20165692	0,609946759
TSPAN17	55,09557426	0,392892616	0,240128939	1,636173537	0,101803273	0,452905417
CC2D2A	28,6186352	1,047028816	0,357648735	2,927533954	0,003416618	0,116585832
RRM2B	84,73436349	0,226207044	0,221400841	1,021708151	0,306919052	0,72756953
ZNF800	243,9131425	0,225940969	0,169458008	1,333315385	0,182428327	0,586966733
TNFRSF17	191,7446118	-1,25340314	0,523846288	-2,392692604	0,016725247	0,220264513
SNX29	430,4898922	0,316603666	0,137915527	2,295634674	0,021696778	0,246616025
MRPS10	381,9514836	-0,057648164	0,136142246	-0,423440672	0,671973776	0,957827799
RSF1	6,353229002	1,583554448	0,389423045	4,06641176	4,77426E-05	0,01560704
VPS13D	18,18708802	-0,498114949	0,431332381	-1,154828552	0,248160642	0,667536957
CELF2	0,904711169	-1,815302957	1,044269641	-1,738346962	0,082149696
FAM120A	969,7685281	-0,136508145	0,150342079	-0,907983618	0,363886877	0,781259819
R3HDM1	729,7491246	0,430274323	0,212574453	2,024111165	0,042958715	0,315409517
COL9A2	71,01707531	0,010806672	0,592904696	0,01822666	0,985458035	0,999884338
KITLG	8,691818047	0,523990852	0,3740004	1,401043558	0,161201048	0,559325751
ERCC8	23,09297084	0,013642176	0,310318486	0,043961856	0,964934809	0,999866967
ADAMTS6	223,1780471	0,790898558	0,344018006	2,29900338	0,021504747	0,246456637
H6PD	176,9349004	-0,198207848	0,23077432	-0,858881732	0,390405769	0,803574146
VAMP3	303,3350874	-0,003849288	0,204745889	-0,018800318	0,9850004	0,999884338
PER3	6,794693427	-0,262946545	0,543670924	-0,483650189	0,628634149	0,942531957
TNFRSF9	56,95981681	-0,072199737	0,32027834	-0,2254281	0,821646254	0,990943318
EPN3	72,15187266	0,013494181	0,62606562	0,02155394	0,982803776	0,999884338
RCN1	12,67611658	0,461259897	0,559876193	0,82386053	0,41001881	0,817861229
ELN	4,788656955	0,956836445	0,489668652	1,954048806	0,050695446	0,339587749
RFC2	291,4447876	0,551484183	0,247132591	2,231531586	0,025645938	0,262153128
ARID1B	578,5817932	-0,457371721	0,21916526	-2,086880567	0,036898932	0,297545873
CLPTM1L	428,4773045	-0,666479522	0,319059348	-2,088888871	0,036717728	0,297104585
NEDD4L	124,8345667	0,911207925	0,365648773	2,49203058	0,01270151	0,198132807
FOXP3	62,20623667	-0,638355369	0,409514941	-1,558808494	0,119041713	0,485834557
PPP1R3F	7,466769611	0,010595391	0,373809398	0,028344368	0,977387494	0,999884338
HEXB	565,3907388	-0,400612465	0,221060294	-1,812231666	0,069950408	0,385208012
PTCD2	38,43043169	0,046727299	0,240227673	0,194512557	0,845774565	0,995405045
JKAMP	247,8748067	0,329657795	0,144894009	2,275165119	0,022896026	0,253032828
DKK3	1,569846508	-0,254517382	0,680279115	-0,374136698	0,708302617
ARHGEF5	43,94643017	-0,459833979	0,296939743	-1,548576743	0,1214835	0,489882086
NFE2L3	60,88538065	-0,287515478	0,234596599	-1,225573941	0,220359049	0,633787006
MCUR1	420,0419374	0,282551605	0,205335559	1,376048098	0,168806743	0,567959286
LIMA1	67,2001082	-0,49541783	0,401514564	-1,233872627	0,217250371	0,63133243
LETMD1	357,9788764	0,380413156	0,194159921	1,959277454	0,050080303	0,337690819
SLC4A8	105,9686543	0,944412619	0,262540411	3,597208574	0,000321651	0,041517999
LAMC3	1,261180225	1,312623118	0,671644147	1,954343121	0,050660652
PTGER3	3,059116723	0,436112956	0,478329058	0,911742552	0,361904258	0,780353326
TNIP3	17,01825854	-0,485861008	0,463176358	-1,048976269	0,294189041	0,714954819
MAPK9	350,1732307	0,008737331	0,152261984	0,057383536	0,954239678	0,999189109
COL23A1	1,043630076	0,052595302	0,885215875	0,059415227	0,952621385
FAM160A2	128,382463	0,26570321	0,210606934	1,261607132	0,207090189	0,616923443
HERPUD1	941,6452111	-0,408703587	0,203096558	-2,012360978	0,044181899	0,318129135
HOMER3	283,4382106	-0,008649719	0,232386727	-0,037221226	0,970308615	0,999866967
RAD51	61,68133353	-0,738829841	0,279097582	-2,647209756	0,008115899	0,162947943
POLQ	923,3053703	0,79275335	0,331823741	2,38907966	0,01689064	0,22157103
PIK3CB	1076,90815	0,018801623	0,234519029	0,080170993	0,93610126	0,999189109
CYBA	2932,437705	-0,082999808	0,171221528	-0,484751009	0,627852979	0,942299979
THOC3	129,1253341	-0,345402131	0,374709902	-0,921785437	0,356640505	0,77537422
HEBP2	175,9539636	0,114185267	0,219306271	0,520665764	0,602599628	0,930866916
MPHOSPH9	216,2485391	0,291337415	0,23320696	1,249265524	0,211567973	0,623489423
PLEKHA5	40,39441264	0,567254891	0,266883579	2,125476933	0,033546837	0,286330573
PRSS8	16,48127755	0,355286135	0,625149501	0,568321872	0,56981643	0,914806949
SIKE1	127,2601194	-0,203692498	0,14857144	-1,371007094	0,170372745	0,568826931
RRP12	296,3868515	-0,382815012	0,249256617	-1,535826883	0,124580845	0,496509056
FNIP2	113,776247	-0,246508713	0,256680526	-0,9603717	0,336868176	0,757183346
MSMO1	153,257949	0,133605716	0,202818466	0,658745325	0,510059322	0,886739458
TTC17	162,8110634	0,166393096	0,166527115	0,999195207	0,317700137	0,738218163
FSTL4	729,4698026	0,143743785	0,593175973	0,242329075	0,808525186	0,990017231
FOXN3	120,103409	-0,151123181	0,195359995	-0,773562575	0,439189511	0,839298002
METTL24	1,114283731	1,746426636	0,579275095	3,014848476	0,002571077
AKR7A2	63,38377011	-0,30643798	0,245573062	-1,247848508	0,212086541	0,623929897
MRTO4	105,2568039	-0,221294262	0,23501611	-0,941613157	0,346390731	0,766937297
NNAT	5,002838963	0,127036311	0,629335923	0,201857714	0,84002796	0,994441733
USE1	129,260366	0,027516182	0,132329149	0,207937423	0,835277828	0,992798467
MCF2L2	140,7663589	0,514852476	0,292550268	1,759876958	0,078428671	0,405410485
NRIP2	2,908065047	0,44101522	0,503432538	0,876016519	0,381021053	0,795149032
AP5M1	309,3010446	0,101806519	0,131243312	0,775708246	0,43792127	0,83825075
ANAPC4	74,52197926	-0,134450638	0,116718918	-1,151918133	0,249354716	0,669135255
KCNQ1	183,2354561	0,000175861	0,208442264	0,00084369	0,999326833	0,999884338
TRAPPC3	414,7735463	0,170296554	0,184018723	0,925430578	0,354741979	0,774236567
THRAP3	1106,671272	-0,381238937	0,178151118	-2,13997499	0,032356788	0,2826244
PHPT1	147,2519382	-0,29967517	0,290114664	-1,032954232	0,301625318	0,722777572
ENTPD2	54,00015929	0,34348211	0,620285033	0,553748827	0,579750754	0,920449351
LY75	535,541173	-0,56008741	0,274694619	-2,03894569	0,041455448	0,311535311
ARID4B	1045,84614	-0,30905854	0,208353723	-1,483335817	0,137985211	0,519191591
OPN3	137,1230963	-0,186260812	0,22796128	-0,817072145	0,4138872	0,820609252
SDCCAG8	47,31959742	0,695221249	0,289935775	2,397845689	0,016491811	0,219819486
KIF1B	438,3947681	-0,290393543	0,226441624	-1,282421216	0,199694926	0,606513509
FOXC1	109,8337557	0,177569994	0,541696347	0,327803566	0,743060191	0,977940138
TBC1D22A	132,5580062	-0,011653201	0,17166884	-0,067881866	0,945879674	0,999189109
SYNE2	365,8812757	0,451093813	0,232435002	1,940731	0,052290914	0,344218684
PLEKHH1	92,39676921	0,9075185	0,282804759	3,208993031	0,001332007	0,079527012
FAM168A	129,6696535	-0,132045513	0,192878648	-0,684604099	0,49359378	0,878079052
RELT	226,9152898	0,025289004	0,165474571	0,152827134	0,8785346	0,99845712
GALC	409,0587966	-0,229817036	0,192883742	-1,191479556	0,233465378	0,65186054
NOP58	327,1567094	-0,275217805	0,225234013	-1,221919377	0,221738117	0,635143239
SZRD1	1154,618691	0,063256063	0,177930127	0,355510694	0,722207034	0,971732498
KCNH2	4,618075424	-0,386823146	0,678790532	-0,569871157	0,568765089	0,914376422
CUL1	369,5000683	-0,787952345	0,330074903	-2,387192539	0,016977597	0,222354828
FAM114A2	857,7131013	0,389388296	0,374687096	1,039235941	0,298695019	0,719765603
CYFIP2	956,9672623	-0,491031677	0,268563363	-1,828364341	0,067494889	0,380284028
TAB2	1979,248739	0,054004688	0,159876894	0,337789202	0,735522048	0,975001257
GINM1	311,4988576	0,207395158	0,174437013	1,188940091	0,234463243	0,6528623
EIF2AK2	2758,697143	-0,467624946	0,320768241	-1,457828073	0,144887938	0,530628131
USP36	217,1942553	-0,357377565	0,249966826	-1,429699975	0,152803147	0,544250914
KMT2C	2,953708834	0,075844132	0,846293532	0,089619179	0,928589843	0,999189109
MCOLN3	1,639443105	0,165961816	0,544318397	0,304898414	0,760443524
MRPL43	364,1912388	-0,070246653	0,232631631	-0,301965183	0,762678604	0,982012429
ITIH4	30,39293997	-0,205669644	0,479724689	-0,428724326	0,668123855	0,957469923
C4orf27	101,3476295	-0,060705127	0,165393818	-0,367033835	0,71359378	0,969007962
ZFR	415,9117439	0,044573112	0,225728941	0,197462991	0,84346524	0,994764366
ZNF280C	47,52973995	0,148407	0,186239606	0,796860576	0,425532009	0,829065385
TRAF1	23,65236866	0,389627148	0,249958323	1,558768449	0,119051194	0,485834557
IL17RB	1,627500326	-0,995584432	0,630757158	-1,578395774	0,114474715
TRAF3IP2	197,7745951	-0,477234231	0,209980087	-2,272759463	0,023040679	0,253081837
DCBLD2	5,278863366	1,133389191	0,535290925	2,117333096	0,034231588	0,289338997
SOAT1	832,5611507	-0,192891551	0,199819349	-0,965329694	0,334379703	0,754998792
PKP2	10,43174139	0,443374515	0,307871218	1,4401298	0,14983068	0,539423449
MSH4	163,4762176	0,726633859	0,429643991	1,691246414	0,09078975	0,432398053
GDI2	2461,066977	0,104724717	0,152997585	0,684486074	0,49366828	0,878116012
PRDM1	556,5033665	-0,517997407	0,320124208	-1,618113824	0,10563807	0,458972422
ATG5	215,0374916	-0,073860406	0,154814483	-0,477089769	0,633298199	0,945615023
TMCC3	1021,578432	-0,095308006	0,276121555	-0,345166844	0,729968943	0,9736692
PITHD1	211,8493289	2,026617747	0,367192883	5,519218478	3,40511E-08	9,27608E-05
MTA3	105,0435596	-0,168918301	0,190421007	-0,88707808	0,375036865	0,789857142
USP13	48,18965109	-0,231668457	0,309470931	-0,748595211	0,454101219	0,850466041
ATP11B	2534,998988	0,055962317	0,231980841	0,241236803	0,809371588	0,990017231
LAMC2	7,003077711	0,575686228	0,434886664	1,323761512	0,185582262	0,589692513
CDK14	527,6621738	-0,227392027	0,210209669	-1,081739145	0,279368454	0,700027193
SEC61A1	1061,447265	-0,757517415	0,341097882	-2,220821219	0,026363073	0,263228115
PPP1R12A	89,97663095	0,050457377	0,167088369	0,301980184	0,762667169	0,982012429
CAMK2B	2,277169629	-0,319415618	0,86310288	-0,370078267	0,711324175	0,968466188
CROCC	55,92403585	-0,208172336	0,230400235	-0,90352484	0,366247411	0,783444235
POLR3E	97,2008346	-0,424349929	0,252783795	-1,678707011	0,093209159	0,435087938
ATP2B4	1915,834941	-0,078496421	0,224617556	-0,349466988	0,72673875	0,972853798
ZC3H11A	1354,613071	-0,248786449	0,11035351	-2,254449801	0,024167885	0,257005415
RIOK2	107,4850438	-0,364376353	0,254292413	-1,432902965	0,15188557	0,543115117
YIPF1	550,9621053	-0,129414021	0,226146046	-0,572258608	0,567146787	0,914305116
NDC1	395,0329232	0,668064901	0,286012079	2,335792612	0,019502053	0,236119299
DGKG	209,4171717	0,353744955	0,21782644	1,623976205	0,104380887	0,456056028
FLYWCH1	58,98140523	0,335240608	0,208276844	1,609591359	0,107487096	0,463189186
UNKL	241,8879977	-0,211751217	0,231135847	-0,916133176	0,359597049	0,778647662
TBXAS1	689,7378009	-0,002179182	0,18254684	-0,01193766	0,990475352	0,999884338
PARP12	645,075885	-0,772097961	0,365390314	-2,113077254	0,034594156	0,290860182
ALDH18A1	85,7096899	-1,068916427	0,428582812	-2,494072084	0,01262869	0,198132807
TARBP1	83,58490022	0,561252453	0,246763931	2,274450929	0,022938888	0,253081837
GATB	101,2901287	-0,309807346	0,27618412	-1,121742067	0,261972125	0,682924143
MXD1	5626,832098	0,057436043	0,278180033	0,206470761	0,836423202	0,993101596
CDK17	483,0761095	-0,317931709	0,159722476	-1,990525799	0,046533045	0,326645387
DNAJC25	26,82658427	0,036707326	0,228748371	0,160470326	0,872510595	0,997948431
SLC2A3	8398,157756	-0,314780176	0,292790518	-1,075103726	0,282328291	0,702382941
CTDP1	291,7913607	-0,043229965	0,17668289	-0,244675445	0,806707742	0,990017231
YBX3	3198,62797	1,053886376	0,372937241	2,825908115	0,004714679	0,129700081
STYK1	28,09247625	0,676356082	0,388196739	1,742302326	0,081455557	0,411336004
WNK1	86,79312478	0,386412681	0,244481971	1,580536509	0,113984053	0,477465234
CCAR1	398,0129042	0,350554305	0,182444747	1,921427235	0,054677868	0,349344894
OGFR	326,0042729	-0,226681119	0,263217917	-0,861191829	0,3891324	0,802612167
GNA15	205,2665967	-0,02553098	0,234934016	-0,108672981	0,913461873	0,999189109
CREB3L3	1,489133146	0,285400194	0,667317387	0,427682839	0,668882046
PIGV	70,90805727	-0,038723965	0,153161829	-0,252830388	0,800399284	0,988461079
QSER1	265,1926644	0,172169354	0,201924217	0,852643418	0,393857077	0,805334896
MPC1	467,2792162	-0,277769912	0,141857115	-1,95809645	0,050218696	0,337931227
ACAA1	478,0043139	-0,027499005	0,114409595	-0,24035576	0,810054471	0,990017231
BCAT1	212,2513243	0,86529437	0,370182556	2,33748013	0,019414233	0,235255234
HDAC7	768,4288149	-0,302488012	0,200260437	-1,510473139	0,130922738	0,507712755
LZTS1	3,991851476	0,28287604	0,674710183	0,419255626	0,675029323	0,958142435
SPAG4	3,309168305	-1,447896398	0,625825925	-2,313576892	0,020690942	0,242052414
NCKAP1	93,95947903	0,352867546	0,366281557	0,963377871	0,335357927	0,756371647
MRPS35	522,0003011	0,294526891	0,258577561	1,13902726	0,254691785	0,674971104
GUCY1B3	246,9942002	0,07935426	0,353756799	0,224318686	0,822509337	0,990943318
SFSWAP	156,6115623	-0,292601805	0,308302666	-0,949073222	0,342583373	0,762255
TNK2	848,0121706	-0,265476463	0,180055828	-1,474411937	0,140370712	0,523109734
MON2	511,8326617	0,089341557	0,106842398	0,836199476	0,403042693	0,8129847
CDH3	60,01161143	0,699537673	0,366921041	1,90650738	0,056584409	0,354901062
GPBP1	2007,850345	0,42583012	0,228232855	1,86577047	0,062073485	0,370499099
DGAT2	1647,829273	0,152946216	0,319514745	0,47868281	0,632164297	0,944996928
ZNF112	2,575836657	-0,156871092	0,640484488	-0,24492567	0,806513985	0,990017231
CS	249,7893488	-0,388334769	0,271918963	-1,428126841	0,153255353	0,545148802
LTK	96,69123517	0,043813331	0,466311732	0,09395717	0,92514318	0,999189109
MRPS24	121,3004908	-0,554143833	0,37590875	-1,474144546	0,140442677	0,523258617
ELMO2	1,041398235	-0,484042114	1,536008177	-0,315129907	0,752663022
WAPAL	804,5733608	0,125604119	0,1657493	0,757795776	0,448573252	0,846349971
VMP1	6968,402731	0,344561469	0,293495424	1,173992643	0,240397972	0,659611357
APPBP2	409,5340357	-0,157880812	0,11123546	-1,419338873	0,155800244	0,549774394
POLD1	45,86269615	-0,856116339	0,422874334	-2,024517142	0,04291697	0,315409517
EIF4B	551,1676284	-0,36417031	0,369941395	-0,984400002	0,324918877	0,745689279
SLC6A16	15,85385145	0,021589586	0,401418357	0,053783255	0,957107851	0,999189109
GLTSCR1	159,814447	-0,462354022	0,198444692	-2,329888576	0,019812041	0,237115245
SPHK2	43,4837494	0,210427487	0,250896381	0,838702758	0,40163613	0,812319249
RPL18	3876,642164	-0,211975171	0,254017345	-0,834490932	0,404004395	0,813656534
CA11	35,67092469	-0,010203568	0,243002168	-0,041989616	0,966506976	0,999866967
ISOC2	44,93672636	-1,012285458	0,482163905	-2,099463373	0,035776073	0,294375629
U2AF2	516,7341427	-0,30494085	0,224904248	-1,355869676	0,175140637	0,574540606
EPN1	5,887070675	0,351158703	0,299837793	1,171162245	0,241533568	0,660951979
MED29	289,7190772	-0,212043622	0,177496308	-1,194636805	0,232228963	0,650241233
AHRR	1,307769353	-1,253374829	0,758142107	-1,653218859	0,09828633
ZNF275	12,469376	-0,29988333	0,344741495	-0,869878835	0,384366623	0,798890189
MTMR1	1,702854322	0,671275452	0,57604385	1,165320057	0,243889463	0,663474015
GPC1	1,482734887	-0,339327424	0,769733195	-0,440837717	0,659330486
ADCK1	18,03101014	0,237979526	0,296382646	0,802946899	0,422005427	0,82725818
HAGH	355,9055158	1,593555521	0,387970196	4,107417371	4,00108E-05	0,014744853
RNF4	1185,989128	-0,432891195	0,145032522	-2,984787051	0,002837758	0,107147533
CASP8	46,65354537	0,446020115	0,231246374	1,928765875	0,053759934	0,346863186
ASUN	177,7082543	0,203621003	0,201524806	1,010401681	0,312302883	0,733378771
TM7SF3	166,2945197	0,394463617	0,158072	2,495468	0,01257911	0,198132807
DLX3	1,337606273	-0,485494108	0,896558214	-0,541508739	0,588156976
SPA17	13,48958154	-0,19704549	0,288693135	-0,68254304	0,494895637	0,878423703
TSPAN32	275,6453598	-0,108495729	0,162430073	-0,667953455	0,504163304	0,883806599
WISP2	1,563072434	0,521440149	0,678850847	0,768121821	0,442414814
ST3GAL6	11,05209966	0,188040915	0,374564162	0,502025911	0,615649294	0,936770407
ATP2C2	10,38097636	0,421084619	0,490419985	0,85862043	0,390549963	0,803769724
NGFR	1,17446932	-1,049624022	0,799446903	-1,312937754	0,189203924
CDON	3,272603103	-0,232702404	0,471316425	-0,493728611	0,621497856	0,939460137
TAF2	264,7211294	0,190220266	0,154865288	1,228295046	0,21933623	0,633621677
HIPK2	757,284713	-0,394591891	0,227068485	-1,737765987	0,082252056	0,413074173
TNPO3	446,0868786	0,036285772	0,145994056	0,248542802	0,803714458	0,9899598
MEF2BNB-MEF2B	190,2341498	-0,102939442	0,225481288	-0,456532082	0,648007406	0,951481807
RFXANK	308,7604056	0,027800765	0,158830398	0,175034285	0,861052694	0,997868956
TMEM161A	146,4434859	0,11834881	0,359906664	0,32883195	0,742282712	0,977587881
LPAR2	247,1753654	-0,061035344	0,280563493	-0,217545567	0,8277832	0,991303244
CTSA	2134,735325	-0,126311231	0,205888088	-0,613494605	0,539549349	0,902583046
SUGP2	177,9042054	-0,091404558	0,205897932	-0,443931403	0,65709218	0,953933303
SLC12A2	38,01286858	-0,157080958	0,245851832	-0,638925312	0,52287152	0,89466137
SNX24	5,337960926	-0,084578893	0,42705122	-0,198053276	0,843003381	0,994764366
EYA2	1,656337378	-1,070866602	0,916100322	-1,168940318	0,242427678
CNN2	3238,904788	0,0438244	0,188249887	0,232799077	0,81591743	0,990943318
ABCA7	63,21652299	0,233996555	0,303165478	0,771844327	0,440206634	0,840361766
BTBD1	841,793038	-0,079029783	0,159280925	-0,496166022	0,619777281	0,938842047
FAR2	287,0855629	-0,121608025	0,243431971	-0,499556507	0,617387389	0,937843575
BCAS1	21,2249404	0,551956315	0,296053459	1,864380562	0,062268281	0,370909273
CHI3L2	40,49141942	-0,446805905	0,32840459	-1,360534895	0,173660718	0,573431199
SBNO2	1448,360439	-0,21338234	0,23339824	-0,914241424	0,360590002	0,779712076
PMS1	29,02403891	0,378669076	0,344193971	1,10016185	0,27126161	0,6914511
HMG20B	215,9173803	0,077675306	0,189118508	0,41072292	0,681275718	0,96037867
CALCRL	21,74078883	0,237422888	0,329410809	0,720750145	0,471063254	0,861630359
TAF11	98,38888428	0,175918022	0,201081553	0,874859076	0,381650588	0,795673325
AP3D1	1,342707516	0,203415379	1,663985358	0,122245895	0,90270428
ZNF76	31,39251887	-0,43253879	0,279374031	-1,548242646	0,121563887	0,489882086
SLC9A3R2	50,4321606	0,599070457	0,441808805	1,355949566	0,175115215	0,574540606
NTHL1	24,98138278	-0,802573244	0,491986785	-1,631290248	0,10282909	0,453886437
UHRF1BP1	102,6760133	0,19441401	0,231886046	0,838403229	0,401804277	0,812319249
GNAI3	1388,743253	-0,128814401	0,135371715	-0,951560681	0,34131983	0,761443888
IPO5	222,1182514	-0,378060682	0,247185099	-1,529463885	0,126149486	0,500100253
OAT	232,2791661	-0,340118708	0,24091129	-1,411800617	0,158008677	0,554098224
WDR3	94,10184011	-0,581407474	0,376690125	-1,543463541	0,122718347	0,491980397
PKN2	1536,771932	0,53047801	0,255620683	2,075254648	0,03796294	0,3016764
WDR18	102,7861328	-0,738387564	0,359915416	-2,051558591	0,04021258	0,306948915
TRAM2	249,9520298	-0,849833023	0,375554224	-2,262877018	0,023643271	0,255280819
MCM10	93,25098984	-0,433836997	0,258595291	-1,677667819	0,093411965	0,435239045
DGKA	383,8417361	0,142760307	0,201964246	0,70685931	0,479653913	0,868210764
ERBB3	3,487295835	1,109340123	0,508042194	2,183559036	0,028994666	0,272733899
ANKRD44	1339,560773	-0,243106576	0,166371345	-1,461228657	0,143952701	0,529518542
KARS	248,4496607	-0,40273922	0,223537911	-1,801659584	0,071598981	0,390355349
ADAT1	240,9864708	0,045155455	0,163870971	0,275554936	0,782889926	0,986458206
PDIA5	1215,235724	0,426887099	0,402426081	1,060783878	0,28878813	0,708213352
TBC1D22B	481,4469414	0,950925604	0,280036714	3,395717619	0,000684489	0,059510525
NDUFB4	738,3659356	-0,237113702	0,172996431	-1,370627707	0,170491041	0,568826931
SPEN	470,7216144	-0,280855116	0,155395682	-1,807354698	0,070706993	0,387690639
MYLK	84,96365604	0,749108157	0,347298913	2,15695509	0,031009164	0,280179538
ZC3H15	312,2946286	-0,080572219	0,188161805	-0,428207087	0,668500357	0,957469923
MAP2K4	1290,542533	0,25750889	0,4184765	0,615348508	0,538324589	0,901983219
TMEM206	45,9498494	0,03821712	0,241159029	0,158472689	0,87408434	0,997948431
SLK	920,5021303	-0,398413726	0,23860241	-1,669780813	0,094962738	0,438568755
CYB5R4	468,6729191	0,195987164	0,208291955	0,940925267	0,346743158	0,766937297
GSTO2	6,529724704	0,020916782	0,600735431	0,034818625	0,972224369	0,999879873
SEC61A2	79,44818738	0,123863296	0,388221122	0,319053469	0,749685967	0,978571864
PRKCQ	90,38297838	-0,330457606	0,410887773	-0,804252713	0,421251041	0,826591904
TLE2	41,63774616	0,379056875	0,523586009	0,723962957	0,469088477	0,859750074
ASB1	166,3637892	-0,038359018	0,163855228	-0,234103109	0,814904932	0,990943318
TBC1D1	676,8113338	0,277573335	0,14426083	1,924107434	0,054341118	0,348452562
CDK13	710,1154361	-0,036636918	0,143809631	-0,254759838	0,798908596	0,988416303
MTHFD2	529,7901173	-0,215185045	0,206017786	-1,044497417	0,296255314	0,717589375
SLC9A7	77,22253958	0,210164614	0,151343786	1,38865704	0,164937064	0,564099137
FOXJ2	255,9533588	0,01108297	0,157335468	0,07044165	0,943842142	0,999189109
YBX1	3868,459916	1,098379505	0,341171166	3,219438259	0,00128442	0,078628643
PDE4A	34,42106417	-0,449694043	0,437916695	-1,026894036	0,304470363	0,724302849
PPP2R5A	979,7467186	0,023237607	0,192917238	0,120453762	0,904123705	0,999189109
ELAVL1	201,2217924	0,099988891	0,167058658	0,598525646	0,549489252	0,908585313
TIE1	219,1165486	-0,189342757	0,569945122	-0,332212259	0,739728987	0,976497904
DIP2B	677,8380081	-0,013982696	0,280481632	-0,049852449	0,96023997	0,999534286
SMARCD1	458,8330335	0,427778896	0,195068075	2,192972356	0,028309371	0,270656239
KDM4A	156,3364862	-0,454433009	0,153174702	-2,966762807	0,00300953	0,109987991
NFYC	430,5004504	-0,138255445	0,153446045	-0,901003641	0,367586384	0,783444235
ZMYND12	5,635430669	0,320427548	0,55978161	0,572415282	0,567040665	0,914305116
ASPM	87,97995512	0,271071091	0,260170742	1,041896905	0,297459479	0,718695519
CD84	491,6799422	-0,004512366	0,194653483	-0,023181534	0,981505469	0,999884338
ELOVL1	331,9080691	-0,193941224	0,124565725	-1,556938907	0,119484991	0,486190996
SPI1	7049,516253	-0,147914307	0,239361544	-0,617953514	0,536605982	0,901115726
MPPED2	18,21281007	0,283267919	0,368133722	0,769470172	0,441614245	0,84154931
ZBTB11	281,6630697	0,061276034	0,149938848	0,408673499	0,682779285	0,961030251
ATXN3	551,477663	0,342415615	0,184604989	1,854855693	0,063616837	0,373635746
FGFR2	5,240714834	0,575223674	0,41152588	1,397782501	0,162178391	0,560105553
LRRC40	171,2572772	0,469183775	0,240645864	1,949685596	0,051213604	0,340852874
ISOC1	47,68759088	-0,049395567	0,30570803	-0,161577592	0,871638504	0,997948431
EML1	6,521691847	0,491305565	0,355372281	1,382509531	0,166815306	0,564980559
TRMT11	40,48250793	0,228794427	0,233020043	0,98186587	0,326165932	0,74677353
THUMPD1	12,29790877	-0,48036183	0,330335395	-1,454163974	0,14590085	0,532100295
MSANTD3	58,81464186	0,382333381	0,275573713	1,387408754	0,165317157	0,564099137
KIF26A	1,178090747	0,732173902	0,694638444	1,054035963	0,291866452
ATG2B	434,7976965	-0,197202887	0,16483867	-1,196338744	0,231564395	0,649103076
ARFGEF1	212,9551348	-0,189756294	0,186212014	-1,019033572	0,308187028	0,729200489
ACSM2B	4,403720861	1,23377722	0,567419884	2,174363737	0,029677829	0,276401207
ZFAT	40,56165434	0,202290111	0,18733883	1,079808768	0,280227346	0,70036893
MTFR1	69,10312912	-0,092877264	0,190309453	-0,488032846	0,625526576	0,941544514
STAG3	37,66002597	0,289279927	0,386313966	0,748820784	0,453965231	0,850339411
FECH	522,8253272	1,889540659	0,447101246	4,22620307	2,37668E-05	0,01130131
MYO9A	168,5689067	-0,343734569	0,255293056	-1,346431332	0,178163452	0,579889395
DDX3Y	247,4587021	-0,774982247	0,706898737	-1,09631296	0,27294184	0,69324579
PFKP	172,5399389	-0,47425508	0,357918212	-1,325037575	0,185158689	0,589396081
IDI1	1505,350104	0,377906654	0,285242288	1,324861947	0,185216944	0,589396081
SP100	2246,956795	-0,3701433	0,254488803	-1,454458096	0,145819343	0,532100295
KLF6	3089,474045	0,011940497	0,200815564	0,059460017	0,952585711	0,999189109
PPAP2A	10,15089491	-0,588508183	0,392597045	-1,499013277	0,133870188	0,512862259
NEO1	38,48668018	0,540224605	0,456172557	1,184254941	0,23631216	0,654997837
TRAM1	989,1089923	-0,07547598	0,225992896	-0,333975011	0,738398416	0,976023754
PHKA1	1,382424892	-2,192493736	0,943197353	-2,324533386	0,020096924
TNFRSF1A	2178,210696	-0,042220857	0,292212602	-0,144486775	0,885116099	0,998863348
CACNB1	25,706434	0,156637317	0,231705184	0,676019909	0,499028005	0,880843708
EVI5	177,1592335	0,84794074	0,207872677	4,079135138	4,52036E-05	0,01560704
STOML1	35,451198	-0,458495935	0,305106205	-1,502742084	0,132905566	0,511411286
PKM	9,712178085	0,012445633	0,224336734	0,055477463	0,955758084	0,999189109
DHX29	359,9906365	0,208540045	0,163548456	1,275096387	0,202275128	0,611577316
DNTTIP2	2037,913422	0,571544552	0,259532917	2,202204483	0,027650868	0,267443696
METTL22	5,417948317	0,292760355	0,384527684	0,761350529	0,446447727	0,844484215
TP53BP1	143,3298415	-0,235004032	0,166649741	-1,410167404	0,158490258	0,55475557
TRO	2,419899185	-1,039496972	0,70650907	-1,471314405	0,141206109	0,523942823
RRP15	69,95641448	0,48153214	0,282461516	1,704770779	0,088237183	0,426571062
RHOA	4232,82886	0,00933164	0,153950108	0,060614702	0,951666065	0,999189109
DHX8	261,4479357	-0,228767261	0,210389635	-1,087350435	0,276881967	0,697245655
PMS2P4	29,25960805	-0,334011178	0,21437801	-1,558047757	0,119221928	0,485834557
PRKCZ	77,50409625	0,088114233	0,224981499	0,391651017	0,695316087	0,964168229
ZFY	475,2967955	-0,005846811	0,781981288	-0,007476919	0,994034337	0,999884338
SYT1	2,871089383	-2,01586036	0,824261098	-2,44565753	0,014458827	0,207853585
NAV3	5,503287481	-0,183335776	0,53485548	-0,342776287	0,731766767	0,974436706
IDH3G	859,1682229	-0,411022382	0,164127263	-2,504290725	0,012269717	0,198132807
ROGDI	99,67566838	0,306588754	0,245044881	1,251153472	0,21087849	0,622703769
PDZD4	21,59440466	-0,421305116	0,47025949	-0,895899233	0,370306584	0,786059885
ROCK1	1549,917353	0,203338842	0,203556753	0,998929478	0,317828855	0,738333234
CBFB	692,5328482	-0,14956217	0,157998404	-0,946605572	0,343839804	0,763699088
PDK3	118,3591051	-0,031730389	0,294979121	-0,107568254	0,914338181	0,999189109
HDAC4	687,8838643	-0,234719494	0,234908263	-0,999196413	0,317699553	0,738218163
IFI35	1557,300427	-0,424816916	0,306520989	-1,385930918	0,165767999	0,564382593
HEATR6	37,00356348	-0,5435705	0,41921269	-1,296646101	0,194752982	0,599818635
COASY	3,114679417	0,654875009	0,614680116	1,065391563	0,286698773	0,706268492
PLEKHH3	32,56497221	0,628096272	0,313375325	2,004293962	0,04503858	0,321433981
MEF2A	244,4998657	0,091568073	0,271899104	0,336772252	0,736288592	0,975111879
OTUD5	544,6877244	-0,272980797	0,144391515	-1,89055982	0,058683128	0,359241846
TFE3	801,6706638	-0,042246834	0,194715851	-0,216966587	0,828234384	0,991317608
TBC1D25	179,3591508	0,142229612	0,138097004	1,029925402	0,303045025	0,724056562
ACSL4	1658,848553	0,004880267	0,238942637	0,02042443	0,983704796	0,999884338
INPP5A	350,1844888	0,207808425	0,265324823	0,783222704	0,433496345	0,834993687
GPKOW	196,4497493	-0,277553276	0,162744313	-1,705456068	0,088109399	0,426490812
GRIPAP1	203,8720838	0,306158427	0,225175863	1,359641401	0,17394343	0,573910807
FTSJ1	113,5898018	-0,588347038	0,344652645	-1,707072458	0,087808586	0,426264132
PRR11	153,6414973	0,256560349	0,203749736	1,259193528	0,207960439	0,618489151
ATP11A	627,9350788	0,023637943	0,177215889	0,133385012	0,893888899	0,999189109
POLR1A	88,42346983	0,064246683	0,211442674	0,303849181	0,761242796	0,981502997
LAPTM4A	956,7901353	0,174083598	0,197452067	0,881649911	0,377966155	0,791728414
TTC7A	166,4033249	-0,282961955	0,315637743	-0,89647693	0,369998096	0,785813264
IP6K2	239,5881759	-0,189989807	0,236299867	-0,804019947	0,421385455	0,826662078
SRBD1	2159,22006	0,186672064	0,291927029	0,639447688	0,522531734	0,89466137
RASGRP2	1076,172538	-0,182183368	0,164455267	-1,10779893	0,267948662	0,689020286
PSME4	542,9090942	0,299238036	0,179625337	1,665901041	0,095733126	0,440251236
IFT80	60,04967661	0,326959097	0,235910948	1,385942873	0,165764348	0,564382593
SIRT2	95,20574183	0,328848126	0,185555415	1,772236748	0,076355266	0,401294798
ERLEC1	373,8717023	-0,424502852	0,230400941	-1,84245277	0,065408949	0,378311844
PPP2R5B	102,1396105	1,020349279	0,240184325	4,24819263	2,15502E-05	0,010875559
PYGM	85,59939742	-0,135561106	0,355967522	-0,380824367	0,703333577	0,966617953
MAST4	106,4765836	-0,260935218	0,208992651	-1,24853777	0,211834186	0,623841579
SDK2	1,221097987	1,287123751	0,811503122	1,586098336	0,112717004
NUP133	1,317384532	2,111890231	0,865070827	2,4412917	0,014634828
NUCKS1	885,8839648	-0,109842521	0,195464617	-0,561956035	0,574145974	0,917569543
VPS35	653,1979033	-0,034105729	0,14111849	-0,241681502	0,809026964	0,990017231
DNAJA2	909,5600703	0,135236391	0,170095987	0,795059269	0,426579026	0,829712162
BCL3	192,7922201	-0,165392962	0,32200418	-0,513636072	0,607506455	0,932964229
KCNAB2	617,1303406	-0,310159738	0,282053358	-1,099649162	0,271485013	0,6914511
ABCC9	5376,633299	0,99713241	0,446445561	2,233491598	0,025516544	0,261928387
GAL	1,16498518	1,518569794	1,029110713	1,475613629	0,140047644
CLEC2D	444,9461023	-0,149010397	0,183807472	-0,810687372	0,417545227	0,823660752
FUNDC1	28,95781718	0,16897292	0,198090638	0,853008106	0,393654809	0,805334896
MAOB	38,10041747	-0,104252905	0,473731996	-0,220067265	0,825818769	0,991079912
RORA	2,495332622	0,851657987	0,591895673	1,438865032	0,150188767	0,539524262
TGFBR3	111,5754467	-0,881531771	0,455165215	-1,93672922	0,052778452	0,344857247
KIAA1107	95,35968929	0,113556807	0,281042239	0,404056016	0,686171528	0,962003411
PLA2G10	5,836821804	0,660919633	0,591625337	1,117125301	0,263940754	0,684779623
HES2	118,7993456	0,163809731	0,503778794	0,325162021	0,745058451	0,978241685
ATP1B3	244,5160626	-0,285591137	0,268446025	-1,063868006	0,287388498	0,706902183
NEDD4	273,3719188	0,855782904	0,460335427	1,859042025	0,063021182	0,372408249
PIGB	275,4929675	-0,034943574	0,246048919	-0,142018807	0,88706515	0,999096253
MAPK6	216,797021	-0,27909507	0,18999476	-1,468961933	0,141843115	0,525481802
GNB5	226,2351976	0,00326356	0,272694432	0,011967828	0,990451283	0,999884338
RAB27A	3655,234913	-0,024333955	0,19295954	-0,126109105	0,89964556	0,999189109
CECR5	106,6384371	-0,279731023	0,255975581	-1,092803548	0,274480063	0,694873919
UFD1L	345,2366542	-0,226151644	0,18151782	-1,245892248	0,212803956	0,624741778
LRP6	20,55864068	-0,012651	0,295863295	-0,042759614	0,965893158	0,999866967
PHRF1	76,61836443	-0,147532608	0,229962578	-0,641550504	0,521165079	0,893896556
IKBKAP	208,690052	-0,502872522	0,201628235	-2,494058049	0,012629189	0,198132807
NUCB2	971,2739371	0,306814013	0,237745284	1,290515663	0,196871677	0,603507485
PFN2	4,967252733	0,165004206	0,407261171	0,405155752	0,685363027	0,961845341
PTPN3	3,103499493	1,674382837	0,674613586	2,48198802	0,013065167	0,200961778
SPTB	401,6482415	0,70040369	0,285294957	2,455016021	0,014087831	0,20599985
DAPP1	1541,205565	-0,263726886	0,232719129	-1,133241118	0,257113011	0,678371618
SLC44A1	4,940415212	1,101948504	0,57955603	1,901366643	0,057254006	0,356773436
TMEM260	170,3085791	0,144252589	0,242735187	0,594279678	0,552325068	0,910422876
SMG6	249,2814117	-0,20594966	0,247630649	-0,831680817	0,405589131	0,814502858
EXOC5	290,4602219	0,199814234	0,161185968	1,239650298	0,215104768	0,628735235
CLTCL1	4,779624343	-4,825556279	1,900454813	-2,539158652	0,011111942	0,189730697
FGF22	22,75979729	0,893207142	0,381890483	2,33890914	0,019340136	0,234958321
FSTL3	287,3691747	0,270307736	0,469296486	0,575984998	0,564625322	0,913489942
DGCR2	1207,153562	-0,202892122	0,2000797	-1,014056504	0,310555791	0,731730267
MNT	159,9511668	0,117475604	0,193518377	0,607051414	0,543816792	0,905438064
ZXDC	143,299977	-0,201842348	0,241149822	-0,836999782	0,402592691	0,812693285
JMJD6	254,4850302	-0,152944586	0,224298568	-0,681879458	0,495315176	0,878423703
POLB	9,982681812	0,779802364	0,336645944	2,316387225	0,020537136	0,241587277
ST6GALNAC1	3,94421077	-1,039535755	0,64483312	-1,612100439	0,106940085	0,461290209
WIPI1	1072,777723	0,35365029	0,293041508	1,206826609	0,227498926	0,643487081
FRMPD1	10,05713943	0,786439106	0,342297129	2,297533461	0,021588357	0,246456637
GBA2	306,8455871	0,026871002	0,256665395	0,104692733	0,916619628	0,999189109
NDST1	750,478141	-0,066132979	0,201779481	-0,32774878	0,743101617	0,977940138
ASNS	75,52907686	-0,542834121	0,235235388	-2,307621	0,021020225	0,243843566
AP3M2	24,89154915	-0,338811132	0,310498268	-1,091185257	0,275191374	0,695746791
ST6GALNAC2	206,9833596	0,024469679	0,280369441	0,087276556	0,930451689	0,999189109
PABPC1	18767,84822	-0,153293544	0,191327987	-0,801208158	0,423011149	0,828073241
CFAP20	44,95247647	-0,361300038	0,224968875	-1,606000108	0,108273886	0,464743437
CSNK2A2	312,3875594	-0,580879502	0,212997004	-2,727172175	0,00638797	0,145622546
EIF2B3	17,75785242	-0,038454821	0,341324346	-0,112663576	0,91029728	0,999189109
CAMK2A	3,306587738	0,962288465	0,520885744	1,84740795	0,064688038	0,377238569
TCOF1	165,1208852	-0,33004401	0,263801682	-1,251106539	0,21089561	0,622703769
CDC42	5655,257433	0,286685779	0,166861404	1,718107198	0,085777064	0,421248628
OSBPL3	151,5107558	0,005342661	0,2521917	0,02118492	0,983098144	0,999884338
SLC12A3	2,759595279	0,007622764	0,518527691	0,014700785	0,988270893	0,999884338
RAD18	31,35759247	0,507255515	0,324140972	1,564922544	0,117601072	0,483205008
ATP2B1	370,5448754	-0,316543366	0,211764602	-1,494788852	0,134969557	0,514597015
TRPM5	1,037273004	0,061320517	0,726226263	0,084437206	0,932708826
MAP4K4	142,1134725	-0,198644866	0,246819247	-0,80481919	0,420924026	0,826526095
MGAT4A	816,5956853	-0,140890552	0,167874657	-0,8392604	0,4013232	0,812136647
RPL31	11,19049377	0,59337779	0,477192879	1,243475784	0,213692559	0,626127931
WDR1	3255,286085	0,038306847	0,142202911	0,269381593	0,78763605	0,986884725
SNX13	593,2457834	0,465066292	0,290366391	1,60165331	0,109232295	0,466649729
MS4A12	14,97708972	0,403891216	0,657713357	0,61408395	0,539159854	0,902583046
ARHGAP10	200,1420402	0,536784013	0,276148624	1,94382288	0,051916814	0,343276828
RPS6KA2	49,03764137	0,225016655	0,306350496	0,734507232	0,462639654	0,857162605
ING3	157,8459898	-0,038073891	0,148318322	-0,256703897	0,797407363	0,988279114
VASH1	45,64670921	-0,349507023	0,422358181	-0,827513327	0,407946171	0,816042121
LMCD1	2,620048855	0,807156848	0,551067636	1,464714665	0,142998782	0,527610631
WBSCR22	545,817625	-0,355112584	0,21195331	-1,675428349	0,093850218	0,436038038
SEL1L	1413,420538	-0,591848281	0,208231696	-2,842258374	0,004479517	0,127556984
TRIP13	94,73232767	0,32917043	0,237083797	1,388413862	0,165011058	0,564099137
ATP6AP1	654,6979111	-0,366256912	0,228840589	-1,600489296	0,10949008	0,467145938
TCF3	217,7836364	0,012192229	0,243101742	0,050152782	0,960000639	0,999503818
TRIB2	248,8881487	-0,657758507	0,340461225	-1,93196305	0,053364067	0,345523014
DAZAP1	327,4013554	-0,506324534	0,3469179	-1,459493829	0,144429238	0,53030549
MBD3	9,299396244	-0,467421631	0,44703762	-1,045597978	0,295746683	0,716944446
HLTF	108,1665234	0,118160031	0,279989394	0,422016097	0,673013268	0,958142435
FAM50A	92,01327669	0,02618464	0,224618512	0,116573829	0,907197777	0,999189109
FAM3A	53,46507516	0,119330581	0,230373147	0,517988238	0,604466475	0,9320759
MYO3B	6,438005058	0,413889047	0,298321054	1,387394693	0,165321442	0,564099137
CYBRD1	365,1852489	1,202596278	0,281166674	4,277165079	1,89288E-05	0,009980385
PDCD2	135,5340943	-0,208743699	0,204961323	-1,018454097	0,308462205	0,72959625
RDH11	290,6784759	0,089050136	0,222016521	0,401096889	0,688348792	0,962452868
PRKACA	395,1537955	-0,134356549	0,211665101	-0,634760047	0,525584924	0,895632286
LPHN1	23,46446712	-0,380354107	0,314732517	-1,208499558	0,226855166	0,642558257
SPP2	7,179668817	1,294441696	0,705116424	1,835784349	0,066389557	0,378600264
ACTN1	2252,758886	-0,323996646	0,28436602	-1,139364843	0,254551013	0,674971104
ZFYVE26	495,7546868	-0,435785718	0,21141519	-2,061279127	0,039276418	0,305552354
EPN2	65,64216499	0,117048312	0,401729946	0,291360686	0,770775479	0,983944853
PTPN18	877,1643243	-0,032755766	0,136758913	-0,239514673	0,81070652	0,990017231
LIMS2	1,274399495	1,10657654	0,762669282	1,450925802	0,146800522
SPEG	81,24935583	0,288647217	0,510388446	0,565544184	0,57170368	0,915767998
ALDH3A2	5,461742037	0,471851507	0,578435869	0,815736942	0,414650606	0,821212183
TFRC	4,103468017	1,269145696	0,678688815	1,869996481	0,061484306	0,368923258
SREBF1	74,58599179	-0,329772256	0,264324046	-1,247605961	0,212175394	0,624078967
AFF4	470,275353	-0,378364374	0,187243839	-2,020703992	0,043310416	0,316304983
UBE2D1	1022,402601	0,137704089	0,291111009	0,47302948	0,636192147	0,946931137
MPP5	40,40252166	0,196325026	0,172810026	1,136074281	0,255925478	0,676877336
RHOBTB1	66,52278563	0,245209599	0,344121026	0,712567906	0,476113178	0,865270145
SMC1A	403,8230092	-0,366396321	0,288588986	-1,269612975	0,204222525	0,613944671
HSD17B10	171,4375185	-0,30049026	0,315209118	-0,953304465	0,34043583	0,760374917
MARK2	886,5617066	-0,168317427	0,179091607	-0,93983984	0,34729972	0,766937297
HMMR	64,58012667	0,578403027	0,294762595	1,962267386	0,049731362	0,335476317
CHFR	567,0761188	-0,068910342	0,120099607	-0,573776581	0,566118998	0,914147926
TRHDE	5,021001334	0,506275545	0,495267119	1,02222725	0,306673356	0,727198028
P4HA2	18,26357447	0,036338329	0,477740995	0,076062825	0,939369116	0,999189109
FCGR2B	40,45734555	-0,304444894	0,436529526	-0,697421082	0,485539312	0,872486813
NFATC3	573,3363141	-0,378298406	0,202566014	-1,867531471	0,061827406	0,369765443
TRNT1	83,74031851	-0,248620577	0,143096668	-1,737430934	0,082311135	0,413074173
ACADVL	228,0476306	-0,202302494	0,202310064	-0,999962583	0,317328616	0,737905282
STK10	961,8060612	0,372647571	0,205646296	1,812080152	0,069973813	0,385208012
FBXW11	63,871067	-0,349957081	0,196625842	-1,779812241	0,075106694	0,3986275
ACAP1	1400,350676	-0,072856298	0,238265092	-0,305778312	0,759773442	0,981028696
EVC	3,85058614	-0,386636617	0,528543897	-0,731512783	0,464465999	0,857692117
DERL2	81,51283993	-0,10739449	0,411895689	-0,26073225	0,794298994	0,987737147
SIDT1	129,3084018	-0,335467055	0,242254499	-1,384771208	0,166122437	0,564712101
NDE1	1332,560509	0,509076109	0,291826631	1,74444706	0,081081165	0,410666293
MRVI1	16,85348218	0,361884889	0,443054112	0,816796142	0,414044938	0,820609252
TMEM38A	181,4602018	0,156464722	0,244528001	0,639864233	0,522260869	0,894514712
AP1M1	697,4241925	-0,169067383	0,190435718	-0,887792399	0,374652433	0,789449828
PVR	32,18496037	0,159012981	0,378122736	0,420532715	0,674096336	0,958142435
XRCC1	218,4783586	-0,244842361	0,166424459	-1,471192169	0,141239154	0,523942823
SCARB1	51,78197151	0,321373376	0,362660498	0,886154894	0,375534066	0,7902716
CYP2W1	1,538829827	0,123011227	0,591883512	0,207830129	0,835361607
MCM2	29,24956411	-0,904905164	0,532849946	-1,69823638	0,089463157	0,429758908
MOV10L1	3,04509925	0,651558179	0,558556572	1,166503468	0,243410947	0,663214982
PANX2	9,938575679	0,334554168	0,490556146	0,681989555	0,495245555	0,878423703
SELO	76,82118803	-0,334751253	0,160137361	-2,090400714	0,036581819	0,29702756
TP63	4,153297167	-1,156312759	0,593061012	-1,949736595	0,051207522	0,340852874
ALPK1	823,5137133	-0,102434971	0,273699462	-0,37426077	0,708210316	0,968098727
LLGL2	18,91772418	-0,056919024	0,289249705	-0,196781616	0,843998438	0,994843414
PDE8A	466,8476892	0,560220262	0,244989046	2,286715559	0,022212431	0,248551341
CLCN4	55,33500176	-0,033006251	0,283772824	-0,116312234	0,90740509	0,999189109
NLE1	26,81133079	-0,561793727	0,318707504	-1,762725131	0,07794686	0,404971846
SDHA	344,4644234	-0,572801634	0,290714453	-1,970323899	0,048801261	0,332495462
SMARCE1	775,7657681	-0,233963749	0,170497929	-1,372238074	0,169989336	0,568777012
GSDMB	50,91565147	0,08477736	0,295173683	0,287211782	0,773950165	0,984695767
KDM5A	1402,788816	-0,188616814	0,200474431	-0,94085222	0,346780596	0,766937297
ADAM11	15,60754437	0,515887209	0,603882373	0,854284264	0,392947504	0,805288917
PPP2R3A	8,928593429	0,596970367	0,49501621	1,205961251	0,227832432	0,643731729
FERMT2	43,76313021	0,98310996	0,377272289	2,605836656	0,009165016	0,171007057
DHRS9	488,9759291	0,455427146	0,457693918	0,995047407	0,319713208	0,740500551
PTGS2	314,5666803	-0,282429571	0,315761397	-0,894439833	0,371086608	0,786645181
IGF2BP2	290,6801668	0,981176758	0,363902002	2,696266446	0,007012155	0,155299179
MAP3K13	43,67553901	0,44556382	0,302613423	1,472386173	0,140916625	0,523830392
ST6GAL1	1146,187658	-0,574203629	0,273873321	-2,096603015	0,036028732	0,294836986
TBX21	107,4931357	-0,761407138	0,451010111	-1,688226316	0,091367793	0,432712029
VDAC1P1	92,39173055	0,363889577	0,662333037	0,549405747	0,582727031	0,9218458
FRY	534,8467079	0,102732849	0,259624903	0,395697206	0,692328417	0,963244455
PICALM	745,3467118	0,300722251	0,192216513	1,564497484	0,117700783	0,483463349
NSF	1106,791981	-0,257406269	0,223043306	-1,154064083	0,248473897	0,667868089
GLI2	5,099067972	0,047669613	0,700173495	0,068082572	0,945719904	0,999189109
CLASP1	211,6328379	-0,078669755	0,146659215	-0,536411945	0,591673878	0,925033639
NOTCH3	14,84729376	0,35659431	0,436425273	0,817079879	0,413882781	0,820609252
CLNS1A	326,5368359	0,004609721	0,17206856	0,026790024	0,97862721	0,999884338
EED	247,2334157	-0,266685949	0,191615543	-1,391776186	0,163990184	0,562522466
CDHR2	1,450713126	-0,087017753	0,816190804	-0,106614474	0,915094835
TSG101	579,5471833	0,185108415	0,151655106	1,220588081	0,222242021	0,635878278
C17orf85	450,7569353	-0,061199191	0,143613345	-0,426138607	0,67000685	0,957469923
ATP2A3	593,1747735	-0,135606572	0,221046382	-0,613475646	0,539561881	0,902583046
CA12	9,364547517	-0,025934187	0,643201753	-0,040320454	0,967837647	0,999866967
MGLL	288,6152588	0,172287787	0,335439927	0,51361741	0,607519505	0,932964229
NTN4	4,252540131	0,351732282	0,548243978	0,641561597	0,521157874	0,893896556
BCS1L	70,66785293	-0,064270001	0,181553426	-0,354000484	0,723338521	0,971732498
NUAK1	2,571598604	-1,834513395	0,758632345	-2,418185049	0,015598142	0,215330771
DPP8	152,9568652	-0,249845805	0,247737182	-1,008511529	0,313208956	0,734172189
SLC24A1	4,022960505	0,105112328	0,577884784	0,181891496	0,855667878	0,996888106
ZNF532	72,70663671	-0,971709864	0,30249712	-3,212294594	0,001316793	0,079527012
SCARF1	457,7738446	-0,41330742	0,321566909	-1,285292138	0,198690216	0,606007014
LMAN1	57,90406253	-1,101829258	0,624855342	-1,763334941	0,077844016	0,404699762
PTPLAD1	62,07495246	-0,600762091	0,259158609	-2,318125157	0,02044252	0,240903382
IPCEF1	346,2782207	-0,018330987	0,169817874	-0,107944981	0,914039336	0,999189109
ZZEF1	594,2387063	-0,280912381	0,129051879	-2,176739958	0,029499975	0,275414044
ENO1	5402,425536	-0,470288358	0,244531531	-1,923221747	0,054452207	0,348754439
MYDGF	267,7175945	-1,240732359	0,441972205	-2,80726332	0,004996438	0,131720614
ANO8	75,26780956	0,039901843	0,407396548	0,097943498	0,92197716	0,999189109
TUBE1	92,78176919	-0,24882443	0,259520715	-0,958784466	0,337667336	0,757919886
TXK	391,1590847	-0,507799969	0,280402591	-1,81096746	0,070145889	0,385389766
ACTR6	179,4692251	0,052752124	0,195036905	0,270472523	0,786796753	0,98651097
TIPIN	85,55066891	0,021697166	0,21942779	0,098880666	0,92123302	0,999189109
SRI	284,4249277	-0,07606216	0,183385627	-0,414766204	0,678313063	0,959739456
EIF4G3	835,6256846	-0,061735142	0,183443945	-0,336534093	0,736468147	0,975111879
NUP37	50,45714682	-0,330713587	0,229914502	-1,438419863	0,15031496	0,539740339
GTSE1	38,53313846	-0,886185124	0,358842371	-2,46956657	0,013527685	0,203637021
SEMA3C	77,21355967	0,912019279	0,375966063	2,425802134	0,015274596	0,212841658
TTC38	293,8380813	0,462096826	0,3087647	1,496598628	0,134497727	0,513414489
ACAT1	138,1240024	-0,202097444	0,215236804	-0,938953937	0,347754395	0,766937297
GRAMD4	6,226685407	-0,116836463	0,387358635	-0,301623489	0,7629391	0,982012429
CELSR1	12,38055301	-0,234133475	0,369580244	-0,633511879	0,526399426	0,896156506
ZNF638	283,4894267	0,042692099	0,134889915	0,316495859	0,751626168	0,97883274
SLC25A40	145,5336262	0,158326192	0,183747635	0,86165023	0,388880021	0,802556054
TIMM21	105,7606034	-0,364690926	0,195690656	-1,863609294	0,062376592	0,371148667
ADD2	75,567344	0,54983734	0,332531737	1,65348831	0,098231523	0,444936379
RASAL2	3,733475496	-0,004843764	0,459040966	-0,01055192	0,991580942	0,999884338
VPS9D1	141,2826798	0,215607159	0,232881416	0,925823807	0,354537553	0,773997102
ZNF37A	127,1060437	-0,219044652	0,171890897	-1,27432375	0,202548703	0,611638723
MARK3	45,39277304	0,683692892	0,22184745	3,081815413	0,002057424	0,094414835
SLC25A3	1077,279834	-0,5557588	0,291739144	-1,904985363	0,056781974	0,355645869
FNDC3B	3132,206472	-0,064682681	0,197393054	-0,327684686	0,743150084	0,977940138
FOSL2	667,8588959	-0,105756102	0,266635206	-0,396632176	0,691638722	0,963179254
FRYL	180,4083779	-0,22747887	0,122734251	-1,853426148	0,063821302	0,374160397
TMEM131	115,8987349	-0,312716508	0,419005456	-0,746330397	0,455467854	0,851548067
FSCN1	58,3280493	0,169980643	0,34806129	0,488364113	0,625291957	0,941447242
ACTB	72330,28197	0,027741421	0,133582105	0,207673186	0,835484156	0,992801783
MOCOS	125,8761451	0,723189268	0,373307807	1,937246568	0,05271521	0,344789961
ATP12A	19,45838698	-0,083876637	0,602066695	-0,139314527	0,889201611	0,999189109
WDR62	49,21646304	-0,007260818	0,276813606	-0,026229988	0,979073897	0,999884338
DLG1	159,2444898	0,034249169	0,157476076	0,217488076	0,827827998	0,991303244
RAB7A	3973,852726	0,073432608	0,15643146	0,469423531	0,638766932	0,948115284
BCAP29	367,9674047	0,698297085	0,192426964	3,628894157	0,000284638	0,040810584
SEC31B	12,44457816	0,007499412	0,357592812	0,020971933	0,983268045	0,999884338
SART3	346,4715663	-0,605757653	0,248592962	-2,436744984	0,014820127	0,210091044
ARHGAP15	890,5462283	0,139682165	0,161959278	0,862452385	0,388438624	0,802252883
EXOSC7	218,7764204	-0,042200895	0,191193257	-0,22072376	0,82530753	0,991009448
KIFAP3	98,38334452	-0,057946566	0,212261535	-0,272996076	0,784856232	0,98651097
MKRN2	138,8569328	-0,076697997	0,160746576	-0,477136117	0,633265198	0,945615023
MCM6	445,288475	-0,713362743	0,269439246	-2,647582913	0,008106948	0,162947943
REXO2	90,6923355	0,266264963	0,382260976	0,696552827	0,486082686	0,872695684
RBM7	423,6202428	0,024927921	0,344377073	0,072385542	0,94229509	0,999189109
RBMS2	36,84741075	-0,066980965	0,360464014	-0,185818728	0,852586917	0,996711904
BAZ2A	1408,786552	-0,273792025	0,209649803	-1,305949356	0,19156978	0,595950539
PTPN23	194,6849216	-0,161814775	0,189786342	-0,85261549	0,39387257	0,805334896
MLH1	31,82718484	0,009443611	0,295214141	0,031989019	0,974480808	0,999884338
UNG	44,10721195	-0,862412191	0,428134198	-2,014350161	0,043972783	0,317350922
FMO4	10,10537825	-0,070801427	0,327012721	-0,216509704	0,828590462	0,991317608
RGS11	1,862566528	0,2247521	0,662699918	0,339146111	0,734499663	0,974995577
SLC46A1	5,871485495	-0,316075405	0,462775497	-0,682999439	0,494607197	0,878423703
PLXNA2	106,3880887	0,83898643	0,38077097	2,203388641	0,027567368	0,267253044
SPAG5	83,925161	-0,818215993	0,36803944	-2,223174756	0,026204018	0,262820722
ANKRD13A	2283,879019	-0,069142117	0,185943868	-0,371844031	0,710008978	0,968431547
TPD52	183,3138315	-0,907714552	0,339503327	-2,673654366	0,007502974	0,159102358
ACACB	92,1727062	0,709326624	0,288599465	2,457823771	0,013978175	0,205776657
TRAF4	59,84623872	-0,030109229	0,277905314	-0,108343479	0,913723234	0,999189109
PAG1	2162,202112	0,051328625	0,280936915	0,182705164	0,855029364	0,996822752
GPATCH1	74,14780543	-0,163183158	0,217838146	-0,749102764	0,453795269	0,850339411
ICAM3	760,6104569	0,002967103	0,232697506	0,0127509	0,989826529	0,999884338
NT5C2	6,268937645	0,355562573	0,690846114	0,514676953	0,606778781	0,932596931
MCAM	85,69511813	0,116374126	0,527777498	0,22049846	0,825482971	0,991009448
MBNL3	958,4387516	1,424663367	0,395204519	3,604876202	0,000312302	0,041517999
CAMSAP3	26,01886186	0,300846699	0,561270408	0,536010264	0,591951457	0,925223528
RAP1GAP	166,5472448	0,958151669	0,540391304	1,773070113	0,07621709	0,401294798
ARHGEF1	996,5024382	-0,179774994	0,220058058	-0,816943471	0,413960733	0,820609252
MAP2K7	418,8184735	0,245603014	0,170355839	1,441705879	0,149385364	0,538960346
DGKD	971,5412296	-0,028804189	0,209171718	-0,137705946	0,89047282	0,999189109
ACTL6B	1,982621369	0,402395702	0,622310952	0,64661517	0,517881038	0,893162854
TOP2B	612,2776532	-0,355904289	0,254175005	-1,400233232	0,161443487	0,559325751
TM9SF3	424,6994071	-0,155016886	0,166980091	-0,928355505	0,353223191	0,77245221
NFKB2	1136,474512	-0,413348802	0,255611208	-1,617099676	0,105856767	0,459627707
UBE2T	122,2626755	-0,283900787	0,246755485	-1,150534861	0,249923644	0,669403068
PPP1R12B	20,81227743	0,794133754	0,276681832	2,870205634	0,004102049	0,123054787
DNAJC10	487,4804212	-0,433666065	0,353579501	-1,226502282	0,220009717	0,633787006
GTF3C1	285,5536271	-0,161368897	0,209430397	-0,770513254	0,440995496	0,841179995
IL4R	1324,066252	0,021121011	0,290407519	0,072728873	0,942021872	0,999189109
USP33	415,2959383	0,270350029	0,136557022	1,979759265	0,047730586	0,329179925
PAK3	23,5536706	0,934519524	0,30446708	3,06936147	0,002145169	0,095105255
SNRPA	207,1761464	-0,673149785	0,262300466	-2,566330874	0,010278073	0,181224498
SPAG6	2,740669198	0,46789449	0,579778029	0,807023493	0,419652948	0,825486315
EXOSC5	29,88898671	-0,253684472	0,308439001	-0,822478582	0,410804572	0,817861229
DYNC1I2	237,0864495	-0,211188604	0,182011983	-1,160300553	0,24592646	0,665177558
APBB1IP	2079,96641	0,076588655	0,220147181	0,347897503	0,727917161	0,973241694
LRCH4	2074,368183	-0,021596798	0,189956133	-0,113693605	0,909480682	0,999189109
FAM76B	245,7314003	0,301779363	0,133929393	2,253272084	0,024241999	0,257128793
SIRT6	381,2437743	-0,143393951	0,26334962	-0,544500314	0,586097232	0,922509944
POLD3	76,70173462	-0,308982283	0,176708769	-1,748539616	0,080370632	0,409239245
CAPZB	2715,532713	-0,04138744	0,184916031	-0,223817478	0,822899329	0,990943318
GPR137B	175,8246572	-0,01826421	0,201015195	-0,090859848	0,927603955	0,999189109
JADE1	210,1475005	-0,069408828	0,166278314	-0,417425618	0,67636712	0,958829766
SLC25A43	21,74916579	-0,484677423	0,311735634	-1,55477068	0,120000694	0,487259038
UBE2A	235,4204447	-0,100493396	0,156777826	-0,64099241	0,521527614	0,894184709
FGFR1	4,645841504	1,599043318	0,739105846	2,163483521	0,03050401	0,279164637
ITGA8	18,88454893	0,587710366	0,397743654	1,47761092	0,13951195	0,521474761
CST7	0	0	0	0	1
MAP2	18,54781007	1,782463004	0,683386817	2,6082783	0,009099894	0,170736336
PIAS2	280,7342648	0,709552219	0,311195069	2,280088245	0,022602455	0,250635774
ARAF	394,8456365	-0,374727148	0,234700797	-1,596616424	0,110351236	0,468978405
MCCC1	89,04189638	-0,048453365	0,200650957	-0,241480858	0,809182451	0,990017231
LAMP3	116,792403	-0,977938565	0,66417657	-1,472407503	0,140910868	0,523830392
FAP	6,623113537	-1,50632918	0,726629734	-2,073035425	0,038168983	0,302333188
NEBL	3,786144715	-0,764069089	0,802903461	-0,951632577	0,341283354	0,761443888
UBE2K	599,921946	-0,085881555	0,168846845	-0,508635832	0,611007508	0,934693993
PIK3C3	129,7507687	0,004624479	0,115605338	0,040002299	0,968091293	0,999866967
N4BP2	93,80088794	0,204296179	0,225569393	0,905691044	0,365099404	0,782424251
C12orf5	60,92977276	-0,262212389	0,313333804	-0,836846792	0,402678692	0,812766512
TULP3	48,63656662	-0,394871256	0,208190676	-1,896680784	0,057870081	0,357531172
SYNJ2	200,8855596	0,541523285	0,286399147	1,890799224	0,058651151	0,359180615
ADCY2	25,58998339	0,527476804	0,426321688	1,237274149	0,215985322	0,630159679
PPP2R5C	490,3232146	-0,256251129	0,279130017	-0,918035015	0,358600535	0,777467269
PMS2P1	6,130200663	0,267199986	0,501718019	0,532570041	0,594331245	0,926941241
GNB1	1428,757625	-0,464953199	0,211930469	-2,193895019	0,028242958	0,270434178
HOXA9	2,868771049	-0,417360737	0,779721339	-0,535269097	0,592463792	0,925530028
EDN1	15,76325233	0,296961948	0,371467273	0,799429638	0,424041331	0,828189574
MLLT10	191,4416735	0,191168605	0,183000607	1,044633716	0,296192291	0,717543055
ZCWPW1	37,09643803	-0,096573436	0,311931382	-0,309598335	0,756866423	0,979950684
P2RY10	171,7920602	-0,528167032	0,348091128	-1,517324025	0,129184895	0,504782716
ITM2A	187,1115624	0,368875333	0,280766759	1,313814123	0,188908764	0,594471663
NRD1	406,8455312	-0,13489751	0,185239784	-0,728231848	0,466471673	0,858580539
VDAC3	1051,926767	0,091839876	0,199020596	0,461459157	0,644469218	0,950037735
PCM1	207,337589	0,098538301	0,1542482	0,638829506	0,522933851	0,89466137
CBFA2T2	1077,308803	0,250611919	0,328184485	0,763631223	0,445087037	0,843961442
ITCH	813,6830156	0,093279625	0,128610148	0,725289774	0,468274278	0,859435139
PKD2L2	42,41412097	1,098253453	0,291737008	3,764532513	0,000166861	0,031696179
TP53INP2	33,35919917	-0,004517318	0,22507083	-0,020070649	0,983987014	0,999884338
SDF4	2245,073362	0,467549652	0,254858962	1,834542717	0,066573473	0,378600264
MYH7B	95,41369446	0,954425816	0,302951467	3,150424801	0,001630332	0,086930338
BPIFB2	1,705897631	-0,410158631	0,773311213	-0,530392711	0,595839678	0,928128811
TP73	12,15591613	-0,932387723	0,546652542	-1,705631369	0,088076735	0,426490812
TOLLIP	53,33869489	0,202199236	0,272967765	0,740744005	0,458848672	0,854190811
UBE2D4	66,21421265	-0,330130201	0,260411283	-1,267726181	0,204895752	0,614162592
RUNX1T1	3,966770994	1,004264968	0,696137657	1,44262411	0,149126388	0,538667582
CDH17	12,24923732	0,972046151	0,36787529	2,642325204	0,008233895	0,163784068
THOC1	47,03284658	-0,11980368	0,251281961	-0,476769917	0,63352597	0,945660455
FKBP7	7,545252775	0,117054902	0,473809198	0,247050718	0,804868973	0,990017231
OSBPL6	3,973250972	0,917030807	0,701151325	1,307892853	0,190909654	0,59524967
SLC1A3	39,87706828	-0,149294287	0,458752177	-0,325435594	0,744851421	0,978241685
XRCC5	1629,105809	-0,259800499	0,180390202	-1,44021402	0,149806858	0,539423449
LXN	83,23849486	0,217111222	0,186291321	1,165439276	0,243841227	0,663474015
MKNK1	91,23377266	0,489876604	0,373088934	1,313029037	0,189173164	0,594523376
TNS1	41,56804797	0,364080211	0,39331312	0,925675225	0,354614787	0,774062325
REXO1	734,7777951	0,152452549	0,389403182	0,391503089	0,695425406	0,964168229
SAR1A	734,5341537	-0,13662807	0,106194505	-1,286583231	0,198239592	0,605137914
CDC14A	230,8896701	-0,036823137	0,170328824	-0,216188526	0,828840797	0,991361411
RAPGEF3	27,81981522	0,140494111	0,514741697	0,272940995	0,784898573	0,98651097
CEACAM1	525,8244183	-0,291283182	0,396857118	-0,733974947	0,462964007	0,857272765
DUSP13	3,564651101	0,165615777	0,513034349	0,322816156	0,746834477	0,978422651
CIC	421,2691808	-0,334481045	0,181902135	-1,838796691	0,065945095	0,378599431
LIPE	67,51099098	-0,180830654	0,238217426	-0,759099184	0,447793227	0,845497387
FDFT1	864,4846656	0,245410379	0,155190297	1,581351301	0,113797736	0,477030152
PAFAH1B3	166,9904808	0,018929473	0,325823886	0,058097255	0,953671161	0,999189109
OPHN1	2479,905955	0,983477394	0,386016821	2,547757873	0,010841769	0,18673205
KIF22	2,084715481	-0,657178203	1,152438699	-0,57025003	0,568508128	0,914376422
LRRC16A	23,85528421	-0,032000309	0,263117654	-0,121619771	0,903200155	0,999189109
PGM1	229,8626081	-0,209264954	0,173418884	-1,206702234	0,227546838	0,643487081
DDX1	85,38062345	-0,372643784	0,314638261	-1,184356226	0,236272081	0,654997822
DNM2	1148,040128	-0,23317122	0,176005356	-1,324796162	0,185238768	0,589396081
EPB41L2	4,956911741	-0,859915774	0,605551603	-1,420053666	0,155592058	0,549331893
RIMS1	5,640310954	0,750809881	0,567312293	1,323450753	0,185685523	0,589692513
MOXD1	11,38399447	-0,841042468	0,510061457	-1,64890418	0,099167267	0,446328163
STX7	1707,800058	0,245691065	0,161936444	1,517206749	0,129214493	0,504782716
RABL2B	26,172944	-0,075376723	0,27276167	-0,276346463	0,782281972	0,986293275
KEAP1	163,8604257	-0,293831757	0,211931761	-1,386445125	0,165611025	0,564382593
DDX43	5,886351703	0,041198042	0,508781936	0,08097387	0,935462733	0,999189109
PTPRH	18,26693704	0,250618204	0,732990155	0,341912102	0,732417042	0,974469398
SLC35C2	415,7155321	-0,263583577	0,13714435	-1,921942658	0,054612973	0,349319808
RFX3	220,2278747	0,526998228	0,228653454	2,304790146	0,021178329	0,24498216
RIF1	211,2809827	0,080441881	0,157321015	0,511323176	0,609124779	0,93371425
RAB21	640,8905803	0,018269519	0,144374206	0,126542822	0,899302254	0,999189109
SLC4A4	8,39584421	-0,63678967	0,45271953	-1,406587583	0,159549717	0,556369704
SMARCA2	342,3158018	-0,161627291	0,205649809	-0,785934554	0,43190583	0,833077742
RDH8	14,9950333	-0,093771504	0,619469639	-0,151373851	0,879680816	0,998491283
SESN1	170,8619429	0,101492403	0,203446556	0,498865179	0,617874366	0,93810466
MID2	21,40826283	-0,855518463	0,524199894	-1,632046236	0,102669747	0,453731908
PIH1D3	2,837646031	1,040596354	0,719374587	1,446529211	0,148028825	0,536243605
COL5A3	3,367468779	0,605751691	0,51246498	1,182035291	0,237191698	0,655693459
SRCAP	484,9809626	0,027925459	0,159556609	0,17501913	0,861064602	0,997868956
KIAA0020	207,2972246	0,186007279	0,20554759	0,904935348	0,365499639	0,782920748
KCNN2	1,348214885	0,774821525	0,917845546	0,844174195	0,398572072
CNOT4	1528,561879	0,346587178	0,220479556	1,571969686	0,115957582	0,480274039
PSEN1	1532,07807	0,002052447	0,205633752	0,009981081	0,992036382	0,999884338
CPOX	36,06722645	0,058945044	0,280938053	0,209815095	0,833811991	0,992546573
CLDND1	378,3217607	0,127209402	0,170305924	0,746946428	0,455095899	0,851384053
MOK	6,746053234	-0,037918877	0,381936328	-0,099280625	0,920915462	0,999189109
HSP90AA1	1608,968717	-0,275926802	0,248048226	-1,112391759	0,265969747	0,68668953
RBL1	1475,985285	0,984727415	0,358640457	2,745723174	0,006037769	0,142528128
DLGAP4	8,22455558	0,274598067	0,353873566	0,775977901	0,437762034	0,838094988
IGSF9B	13,02212441	-0,471581889	0,490194569	-0,962030016	0,336034526	0,756508462
CROCCP3	27,48730476	0,374298047	0,305634421	1,224659335	0,220703602	0,634345856
NDC80	39,07364625	0,668808688	0,274100461	2,440012997	0,014686734	0,209518274
AP4E1	67,90601048	-0,290947466	0,260541957	-1,116701009	0,264122186	0,684924184
RSBN1	424,5098972	-0,075395044	0,219894798	-0,342868704	0,731697237	0,974436706
MAGI3	6,715979083	-0,397587893	0,510064203	-0,779485976	0,435693496	0,836549066
CXCL2	5,191178882	-0,822812418	0,579371063	-1,420182109	0,155554671	0,549331893
TCF7	7,734222341	-0,207166911	0,3073158	-0,674117343	0,500236714	0,881739361
OSTM1	263,221536	0,439223884	0,224961401	1,952441089	0,050885859	0,33983641
CDH7	0,985064172	0,007027282	0,76057716	0,009239407	0,992628124
IMPG2	6,788006056	0,566518646	0,401702563	1,41029383	0,15845294	0,55475557
PCNP	992,3808514	0,158923894	0,135073427	1,176574086	0,239365546	0,658214981
EXD2	11,69617071	0,726467567	0,437447056	1,660698265	0,096774062	0,44252213
ARG2	41,99464532	0,792670514	0,330058079	2,401609184	0,016323137	0,219819486
CACNA1S	2,755877197	-0,106201869	0,685002497	-0,155038659	0,87679084	0,998166347
UBA5	105,6301766	-0,953540815	0,396281725	-2,406219506	0,016118577	0,217914089
STK17B	2534,198549	0,248183966	0,136024414	1,824554568	0,068068275	0,381305123
CDC14B	64,19270039	0,528604126	0,245029583	2,157307378	0,030981723	0,280179538
ZNF510	132,1186851	-0,179345245	0,179417495	-0,999597308	0,317505426	0,738106413
ZNF506	483,7956813	0,192263061	0,161083054	1,193564789	0,232648255	0,650762944
JMJD4	42,46069654	-0,389013671	0,29192345	-1,33258795	0,182667062	0,587224859
DUSP12	96,18275599	-0,136930887	0,193309096	-0,708352014	0,478726684	0,867471073
AACS	50,07284242	0,529506245	0,352767099	1,50100802	0,133353487	0,512070435
KIAA0141	126,1475761	0,087786814	0,175418887	0,50044106	0,616764548	0,937333012
SLC13A1	1,868015189	1,184021106	0,713583961	1,659259695	0,097063473	0,44252213
CADPS2	1,130479337	-0,139148078	0,858301922	-0,162120199	0,8712112
PCDHB4	129,7152081	-0,075594509	0,628911377	-0,120198984	0,904325522	0,999189109
HSPB11	283,1161434	0,278091017	0,209533399	1,327191838	0,184445232	0,588578336
PHLPP1	102,5830394	0,209265401	0,226726885	0,922984501	0,356015282	0,775235528
ATP8B1	8,403596522	1,373671168	0,813455211	1,688686912	0,091279445	0,432712029
IL12RB2	10,10879407	-1,028989378	0,466733369	-2,204662119	0,027477813	0,266859689
SMARCD3	146,8767548	-0,100832882	0,270136915	-0,37326584	0,708950598	0,968098727
WDR70	134,3069442	-0,137141276	0,243635703	-0,562894824	0,573506505	0,917307352
FYB	4233,387964	-0,229846271	0,211228347	-1,088141218	0,27653277	0,69716937
MPP4	34,94078851	0,695833511	0,514207252	1,353216059	0,175986616	0,576226148
STRADB	3292,089898	1,691078582	0,480917345	3,516360139	0,000437507	0,04735797
BZW1	2010,939709	-0,169226486	0,08016376	-2,111009832	0,034771467	0,291529581
C1QTNF3	25,78895925	0,291238855	0,363684435	0,800800986	0,423246868	0,828170684
ME2	72,86230129	-0,378073939	0,338182472	-1,11795841	0,263584757	0,684205009
C5orf22	47,610632	-0,102886128	0,323180186	-0,318355309	0,750215435	0,978571864
CCNT2	596,0848312	0,2720282	0,210889247	1,28991024	0,197081825	0,603539805
FAM135A	151,9364235	0,701523442	0,239432046	2,92994799	0,003390187	0,115939049
EPB41L3	261,4438456	-0,381871417	0,330757312	-1,154536582	0,24828025	0,667536957
COBLL1	14,2518124	0,965626506	0,489540351	1,972516677	0,048550654	0,331617403
TRAF5	8,812253637	1,084166014	0,365249402	2,968289638	0,00299462	0,109987991
MRPL22	61,25075359	0,073403973	0,280600115	0,261596374	0,79363264	0,987737147
GEMIN5	59,59268885	-0,596481506	0,377017607	-1,582105171	0,113625563	0,476574245
NFE2L1	381,6941662	-0,350319158	0,259856771	-1,348124032	0,177618493	0,579060162
GSK3B	318,7139834	-0,098618973	0,148887098	-0,662374203	0,507731432	0,88616472
ITGB5	173,4382198	0,270653551	0,382212931	0,708122434	0,478869229	0,867471073
ERC1	181,2152314	0,157779933	0,153570429	1,027410901	0,30422702	0,724302849
XPO1	326,7466949	-0,259825984	0,252352078	-1,029616978	0,303189842	0,724296692
RNF13	2021,87648	-0,099509604	0,209686984	-0,474562621	0,635098754	0,946857675
TRPM3	42,39889288	0,951479591	0,271224761	3,508085272	0,000451344	0,048217147
PALB2	61,89747184	0,144948784	0,190164928	0,762226688	0,44592472	0,844484215
LYRM2	185,383191	0,149689082	0,222271726	0,673450846	0,50066051	0,881943427
BCKDHB	48,58714101	0,035470881	0,234889967	0,151010628	0,879967332	0,998491283
KAT6A	920,9503452	-0,420408181	0,25264144	-1,664050766	0,096102285	0,441232005
ZCCHC6	228,6438062	-0,006824041	0,376926867	-0,018104416	0,985555555	0,999884338
ULK2	112,7148827	0,237845961	0,207242921	1,147667478	0,251105862	0,671227815
TNPO1	113,1972005	-0,30846944	0,173825395	-1,774593642	0,075965008	0,401106028
PLOD1	4,867806042	1,116365948	0,44530416	2,506973991	0,012176967	0,197176098
P2RX5	116,4959029	-0,332924284	0,495310813	-0,672152263	0,501486768	0,881943427
ITGAE	42,84929607	-0,15310307	0,224295658	-0,682594893	0,494862862	0,878423703
DIS3	152,1689607	-0,239848895	0,160688096	-1,492636366	0,135532399	0,515660395
PIBF1	66,21429398	0,457923617	0,19794174	2,313426255	0,020699215	0,242052414
TDRD3	173,7475391	0,131337735	0,155372955	0,845306285	0,397939853	0,809306412
NUFIP1	33,14658036	-0,229261171	0,175136837	-1,309040265	0,190520712	0,59524967
PDS5B	297,7171833	-0,09205113	0,122764703	-0,749817563	0,45336459	0,850204915
OXCT1	63,26478079	-0,483394397	0,358272283	-1,349237492	0,177260696	0,578655098
RRAGB	231,2521373	0,344897465	0,27611868	1,249091388	0,21163165	0,623489423
CYLD	984,0539623	-0,411921891	0,171609409	-2,400345609	0,016379599	0,219819486
SLC27A5	74,97884587	0,526571905	0,372744721	1,412687758	0,157747553	0,553419993
ZNF324	93,82809381	-0,090667748	0,17732138	-0,51131876	0,609127871	0,93371425
ZNF671	77,82437237	-0,193359156	0,184113315	-1,050218208	0,2936178	0,714616951
ZNF416	41,78319707	-0,064564546	0,160877365	-0,40132772	0,688178858	0,962452868
ZNF586	495,7321536	0,226304226	0,201910151	1,120816488	0,262365984	0,683212921
ZNF446	10,81977462	-0,217120853	0,346162491	-0,627222356	0,530513491	0,898354789
ZNF264	165,3531144	-0,133648839	0,20057371	-0,666332783	0,505198416	0,884570767
RPS5	1476,997894	-0,149218852	0,264587684	-0,563967491	0,572776257	0,916587812
FAT1	15,99776763	1,507272282	0,868054864	1,736379052	0,082496834	0,413403819
YTHDC1	695,840038	-0,29649753	0,159348352	-1,860687766	0,062788282	0,372231917
CHMP2B	744,6848391	0,010227753	0,230114531	0,044446358	0,96454861	0,999866967
SMAP2	4702,05283	0,21740059	0,323824872	0,671352354	0,50199609	0,881943427
PPIE	10,61406338	0,304011137	0,353434635	0,860162268	0,3896996	0,802800908
ZMPSTE24	270,8324341	0,189593088	0,185809524	1,020362591	0,307556529	0,728657988
STARD7	441,2583481	-0,283447251	0,317677028	-0,892249758	0,372259077	0,787501833
NOA1	266,0268374	-0,125793663	0,162184473	-0,775620876	0,43797287	0,838251354
REST	332,1168906	-0,103382457	0,193756781	-0,533568202	0,593640313	0,926570943
HAL	510,0526649	0,049691992	0,34567557	0,143753267	0,885695307	0,998863348
SSH1	618,4126185	-0,143154416	0,241760286	-0,592133713	0,553761053	0,910627217
APLP2	4691,583183	0,58820571	0,296576062	1,983321598	0,047331518	0,328087192
KIAA1467	71,63227151	-0,172495147	0,255828759	-0,674260189	0,50014591	0,881708352
SLCO1A2	1587,649175	0,452139771	0,617694096	0,731980075	0,464180729	0,857675871
WBP11	726,8240734	-0,622975006	0,259905179	-2,39693187	0,016532997	0,219819486
EIF3I	76,30526692	-0,109028821	0,247529214	-0,440468499	0,659597822	0,955484021
TXLNA	271,1637985	-0,429226125	0,216307705	-1,984331189	0,047218931	0,328004009
APOB	14,44672259	0,082053552	0,635560498	0,129104235	0,897275171	0,999189109
AGBL5	23,02314923	-0,073901542	0,226200053	-0,326708773	0,743888164	0,977949975
EFR3B	2,84229301	0,733503419	0,477665124	1,535601787	0,124636076	0,496509056
KIF3C	147,7606265	0,137917005	0,295440794	0,466817743	0,640630281	0,948813151
RAB10	1441,076863	0,074876991	0,16755237	0,446887089	0,654956586	0,953823878
HADHA	884,8796291	-0,203993036	0,178220459	-1,144610653	0,252370477	0,672514984
MAPRE3	8,141491649	0,207310194	0,343038031	0,604335891	0,545620349	0,906450785
CAD	111,0026979	-0,244974063	0,2602457	-0,941318386	0,346541723	0,766937297
CD59	9,664550145	0,788929561	0,462628092	1,705321347	0,088134508	0,426490812
CD82	883,7177062	-0,28776339	0,274504743	-1,048300246	0,294500296	0,715352555
BCORL1	7,361935272	0,078455184	0,382239135	0,205251572	0,837375578	0,993316193
ATRX	157,9061456	-0,131988972	0,262311328	-0,50317679	0,614839981	0,935855789
TAF9	27,63712479	0,100725679	0,257931343	0,390513529	0,696156853	0,964213521
FCN1	5627,839085	-0,501850518	0,336972532	-1,489292065	0,136410476	0,516356932
MYNN	227,5211281	0,286615778	0,16635868	1,722878407	0,084910516	0,418766995
SCAMP1	1,785302819	1,787569004	0,753801777	2,371404602	0,017720621	0,226774995
PREP	154,9236599	-0,332862324	0,288030794	-1,155648394	0,247825005	0,667111281
HACE1	68,70502462	0,315611633	0,229540706	1,374970214	0,169140679	0,568043426
SEH1L	303,3247817	0,259046352	0,215474098	1,202215738	0,229279953	0,645578094
WDR47	202,9125612	0,133420993	0,150809402	0,884699435	0,376318761	0,79047919
WDFY1	267,3985315	-0,205003623	0,265263709	-0,772829514	0,439623284	0,839738527
OVGP1	215,2550148	0,170304014	0,548446653	0,310520655	0,756165055	0,979950684
SLC25A24	365,6535066	0,059932396	0,207542566	0,288771584	0,772756179	0,984288519
MAP3K4	21,2576275	-0,825693393	0,516584548	-1,59837029	0,109960593	0,468069217
PILRA	1151,482633	-0,024280428	0,204252593	-0,118874515	0,905374773	0,999189109
ABCB1	40,40618492	-0,467827855	0,390979338	-1,196553909	0,231480475	0,648979135
ZNF213	70,6705253	-0,133823854	0,203884632	-0,656370478	0,511585781	0,888236717
AKR1B1	634,6856799	0,327997112	0,211464628	1,55107317	0,12088415	0,488709233
CPNE3	456,9603435	-0,20012898	0,164340606	-1,21776951	0,223311574	0,637535475
RRN3	120,9425779	-0,41758217	0,288115394	-1,449357371	0,147237807	0,534919306
CTTN	435,063478	0,025459835	0,329646943	0,077233644	0,938437677	0,999189109
WNT11	4,724298431	0,172632091	0,482930484	0,357467785	0,720741639	0,971732498
MTIF2	194,8770714	-0,398793186	0,182677337	-2,183046856	0,02903236	0,272733899
DDHD2	224,9990323	0,198347971	0,163896805	1,210200353	0,226202023	0,641885509
TTC39A	4,390076537	0,294229382	0,857680851	0,343052292	0,731559121	0,974436706
EPS15	2396,587818	-0,004763243	0,184388827	-0,025832599	0,97939086	0,999884338
ORC1	37,97551058	-0,81377884	0,4243945	-1,917505624	0,055173727	0,35036046
MGST2	219,6647392	0,124934978	0,205019773	0,60938014	0,542272499	0,904987134
CHERP	151,6510928	-0,411331349	0,243360158	-1,690216477	0,090986547	0,432569841
ATG16L1	132,4183939	0,116690637	0,199840072	0,583920111	0,559274062	0,912914044
USP40	49,40214359	0,20543081	0,254627895	0,806788315	0,419788452	0,825486315
POMGNT1	429,6972899	0,342763883	0,185964398	1,843169377	0,065304284	0,378311844
RAD54L	11,26974049	-0,949690647	0,45108138	-2,10536433	0,035259606	0,293349479
MAST2	53,12360468	-0,200851686	0,24120208	-0,832711252	0,405007597	0,814072496
DNAJA1	1795,941084	-0,034562793	0,203141102	-0,170141802	0,864898619	0,997948431
CHMP5	2055,811062	-0,157661662	0,274786446	-0,573760696	0,566129749	0,914147926
NFX1	85,93202387	-0,174281644	0,221901495	-0,785400943	0,432218528	0,833385849
AQP6	16,49240659	1,069654018	0,34886656	3,066083538	0,002168827	0,095105255
DIMT1	91,38837922	0,378670749	0,210096344	1,802367153	0,07148766	0,390064775
EIF2AK1	8,831905131	0,533382398	0,539502192	0,98865659	0,322831189	0,743612709
NME8	47,60302203	0,180119241	0,343461139	0,524423932	0,599983715	0,929544225
EPDR1	80,44872339	0,372907227	0,300865977	1,239446319	0,215180257	0,62884343
SNX10	80,25615577	0,210292568	0,310611907	0,677026746	0,498388985	0,880476433
MRPL28	340,1188719	-0,38615477	0,209705393	-1,841415547	0,065560686	0,378462752
HBQ1	91,59300571	1,695645558	0,47718927	3,553402526	0,000380282	0,044540246
ITPKC	151,8055758	0,68678349	0,377494322	1,819321378	0,068862414	0,383336205
CEACAM6	96,0672235	-0,117255007	0,652258792	-0,179767615	0,857335009	0,997518559
RBM22	425,975796	-0,125009516	0,15110673	-0,827292841	0,408071101	0,816092272
TMED2	1023,017356	-0,035593457	0,169918411	-0,209473808	0,83407838	0,99271908
ERO1LB	76,24776071	-0,308322399	0,218901362	-1,408499222	0,158983297	0,555846415
ZFAND6	480,1107376	-0,010202121	0,135421776	-0,075335895	0,939947463	0,999189109
TXLNG	132,1947995	0,067115614	0,181669566	0,36943785	0,71180139	0,968577842
PPEF1	1,958663066	1,232539003	1,099460767	1,12103955	0,262271028	0,683158558
LAT2	55,23984083	0,27269937	0,319832965	0,85263059	0,393864193	0,805334896
HUWE1	489,6679314	-0,593007937	0,258391362	-2,294999073	0,021733177	0,246686656
ZW10	177,5513392	0,511008404	0,260876156	1,958816061	0,050134332	0,33783316
ALG9	11,95489038	0,722888677	0,352944676	2,048164277	0,040543905	0,30851496
MYBPC2	2,979753504	0,216489005	0,570714855	0,379329543	0,704443164	0,966923372
NOX4	4,356164777	0,689896674	0,630478779	1,094242497	0,273848637	0,694176636
ACOX3	52,26181993	-0,443129991	0,276579846	-1,602177444	0,109116376	0,466520317
MTMR2	107,1808826	-0,009142254	0,159291148	-0,057393359	0,954231853	0,999189109
PPP1R15A	365,6524505	-0,292834266	0,230586862	-1,269952087	0,204101698	0,613940311
HSD17B14	15,50195361	0,25013663	0,572902518	0,4366129	0,662392106	0,956155352
TRIP6	68,35997762	-0,616973744	0,188990985	-3,264567057	0,001096315	0,076085889
ACHE	4,40181306	1,377576553	0,516000364	2,66972012	0,00759145	0,159546437
FTL	28868,87322	0,569556746	0,180264505	3,15956126	0,001580069	0,085822237
BAX	654,7103092	-0,037834726	0,235893417	-0,160389073	0,872574597	0,997948431
NLK	1851,507517	0,387446662	0,255210514	1,518145377	0,128977754	0,504219419
PIGS	339,6613425	-0,325442949	0,194978139	-1,66912532	0,095092546	0,438568755
ADAMTS2	49,56152176	-0,676813406	0,612524698	-1,104956923	0,269178255	0,689611063
ATXN7L3	981,3341492	-0,159350067	0,185856044	-0,857384373	0,391232493	0,804172285
PGS1	830,1567792	-0,092388124	0,321531527	-0,287337682	0,773853773	0,984695767
PSMC5	334,8483161	-0,06472464	0,256088108	-0,252743638	0,800466324	0,988461079
UIMC1	279,7238288	0,118429912	0,235163853	0,503605932	0,614538323	0,935855789
CETP	7,53275439	-0,31094877	0,488370711	-0,636706426	0,524316087	0,895461083
MMP2	3,234678354	-1,046612697	0,75320911	-1,389538022	0,164669207	0,563820415
MT3	87,09440562	0,20527149	0,577091859	0,355699853	0,722065355	0,971732498
LPCAT2	1458,310667	-0,269919141	0,292769794	-0,921950101	0,356554604	0,775294001
GNAO1	12,8704702	-0,210982393	0,552878145	-0,381607402	0,702752593	0,96646903
OGFOD1	242,2912531	-0,529533861	0,240874646	-2,198379405	0,02792208	0,2686206
SH3BP2	154,9701877	-0,536268779	0,676660216	-0,792522993	0,42805579	0,830650825
NOP14	430,8261481	-0,090209047	0,183908379	-0,490510806	0,623772485	0,940549933
ADD1	1998,553934	-0,048749198	0,148884048	-0,327430632	0,743342201	0,977940138
L2HGDH	89,74265133	0,44888067	0,283365657	1,584104	0,113170054	0,475690691
TXNDC16	135,4769441	1,050285709	0,29137006	3,604645267	0,00031258	0,041517999
C14orf166	565,8017404	-0,044352972	0,155321277	-0,285556316	0,775217966	0,984851532
NID2	7,223559702	0,195784392	0,4054313	0,48290399	0,629163909	0,94278337
GMCL1	424,3039181	-0,036312955	0,176323597	-0,205944952	0,836833911	0,993101596
SF3B2	702,2901932	-0,404754207	0,180679532	-2,24017742	0,025079407	0,261508636
KLHL42	26,1059941	-0,175759063	0,329013826	-0,534199628	0,593203426	0,926154361
GNAS	5,515661861	0,873158506	0,40989779	2,130185931	0,033156266	0,285493819
DNM1L	453,3840455	-0,17097986	0,198684866	-0,860558046	0,389481501	0,802725185
PHACTR3	49,45627168	-0,024465289	0,385998978	-0,063381746	0,949462523	0,999189109
ERGIC2	944,771568	-0,021509118	0,142586212	-0,150849913	0,880094111	0,998551871
AURKA	9,900816215	-0,186309722	0,491404373	-0,37913729	0,704585916	0,966944653
CASS4	167,2995854	0,372323611	0,306570607	1,214479154	0,224564805	0,639350591
PIR	5,692325214	0,164171316	0,449814459	0,36497563	0,715129598	0,969622006
AAMDC	60,96973023	0,501278812	0,191006509	2,624406959	0,00868	0,16770048
RFX2	111,6782708	0,018192635	0,339419019	0,053599338	0,957254384	0,999189109
METTL2A	67,76213471	-0,430294781	0,307762143	-1,398140708	0,162070818	0,559934927
SULT2B1	2,235508947	0,705413379	0,453556144	1,555294504	0,119875946	0,487042588
ALG6	105,2397622	0,011951684	0,193937692	0,061626413	0,950860342	0,999189109
CNOT3	113,3844568	-0,246098986	0,178864459	-1,375896513	0,168853675	0,567992851
GP6	195,7295061	0,393336734	0,373896381	1,051993957	0,292802322	0,713348332
PTPN4	2481,667116	0,721287047	0,336611351	2,142788844	0,032130058	0,282516884
DDX18	499,2452276	-0,882485698	0,310297681	-2,843997078	0,004455146	0,12722031
KHSRP	303,4836188	-0,563245302	0,359379315	-1,567272458	0,11705102	0,482395063
GNA11	22,09803696	-0,039164623	0,438215568	-0,089372962	0,928785511	0,999189109
ASAP3	2,119352364	0,685192446	0,515479173	1,329234005	0,183770779	0,587450831
TPX2	62,00245275	-1,170393295	0,392129689	-2,984709721	0,002838475	0,107147533
FER1L4	36,21884789	0,397079397	0,572131663	0,694034996	0,487660263	0,873108476
PDRG1	21,0222192	0,034302323	0,233170513	0,147112613	0,883043134	0,998784579
EPB41L1	2,112453161	-0,317771426	0,527952552	-0,601893911	0,547244758	0,907296977
SLC15A1	37,65094164	0,642736787	0,387250986	1,659742157	0,096966335	0,44252213
DOCK9	63,31681102	-0,313849706	0,370044341	-0,848140807	0,396359558	0,808204491
ANKRD10	229,9620069	-0,344440598	0,125666093	-2,740919123	0,006126759	0,143675567
TGDS	33,50995661	0,054210619	0,23279669	0,232866794	0,815864844	0,990943318
C3orf18	33,92304124	-0,865712281	0,323639833	-2,674925004	0,007474597	0,159102358
COQ9	62,47067032	-0,352297489	0,310426241	-1,134883079	0,25642431	0,677757981
TMEM40	358,0181746	0,567334419	0,392324892	1,446083157	0,148153879	0,536466234
KIF9	14,7265609	-0,252805099	0,249672359	-1,012547405	0,311276393	0,732480944
ARHGAP28	27,11626592	0,764935121	0,429615431	1,780511281	0,074992325	0,398544198
CRLS1	201,5388925	0,224356904	0,215677671	1,040241686	0,298227629	0,71929911
PPP1R13B	24,27158387	-0,292119822	0,405801125	-0,719859568	0,471611464	0,861874309
ATRN	87,80828353	-0,141748892	0,313532671	-0,452102461	0,651195171	0,953207814
SMOX	397,86352	0,177079312	0,28196483	0,628019145	0,529991398	0,898335057
FKBP1A	2726,102264	0,019537175	0,131768258	0,148269206	0,882130316	0,998784579
NSFL1C	1052,106568	-0,071292468	0,193637849	-0,368174238	0,712743318	0,968698465
SLC4A11	3,956232754	-0,802387548	0,537920352	-1,491647499	0,135791579	0,515769705
ZNF343	22,18703912	0,532284884	0,343291534	1,550533093	0,121013617	0,488869888
CPXM1	3,400114849	-0,505925273	0,512661339	-0,986860593	0,323710985	0,744251557
MAVS	115,5470485	-0,116508018	0,209585065	-0,555898473	0,578280262	0,92008088
LZTS3	2,883226799	-0,952198793	0,567345995	-1,678338793	0,093280979	0,435087938
DYNLL1	876,2032396	0,370348263	0,229379457	1,614565958	0,106404723	0,460421587
TESC	465,1805741	1,089945733	0,280405124	3,887039289	0,000101474	0,024833881
SNX5	642,1005673	0,035440826	0,17791318	0,199202924	0,842104012	0,994764366
RPL6	2083,229611	0,031028026	0,212577227	0,145961196	0,883952022	0,998826063
SIRPG	106,8729651	-0,417094578	0,416812847	-1,000675919	0,316983513	0,737554585
MAPKAPK5	118,4084759	0,038418439	0,183368275	0,209515193	0,834046076	0,99271908
P2RX7	2,439225826	0,120708322	0,572576772	0,21081596	0,833030884	0,99220967
ESF1	83,2650272	-0,210901225	0,283666259	-0,74348365	0,457188917	0,852664633
RBBP9	43,92787287	-0,551527038	0,302738	-1,821796532	0,068485864	0,382309238
ANAPC5	512,8742992	-0,13602467	0,145148561	-0,93714102	0,348686023	0,768002224
SLC23A2	45,4386137	-0,485817385	0,389740775	-1,246514135	0,212575703	0,624582036
SLC8B1	14,36182704	-0,143885313	0,336307135	-0,427839013	0,668768331	0,957469923
TMEM230	143,4418572	0,110684808	0,253235869	0,437081874	0,662051972	0,956108807
DZANK1	10,58397655	-0,234870323	0,277927244	-0,845078444	0,398067043	0,809455812
KDM2B	139,6386799	-0,218448344	0,322965443	-0,676383028	0,49879749	0,880843708
OAS1	2791,345166	-0,480297441	0,407724411	-1,177995303	0,238798479	0,65781638
GCN1L1	131,8048971	-0,804499034	0,375802848	-2,140747572	0,0322944	0,2826244
RPLP0	4651,987205	-0,132039146	0,290654956	-0,454281419	0,649626288	0,952342197
PXN	2427,916527	-0,116728834	0,186646771	-0,625399695	0,531708762	0,898565269
RPH3A	26,33340048	0,18946657	0,693997106	0,273007723	0,784847279	0,98651097
KIF16B	73,30075252	0,348312661	0,223156737	1,560843138	0,118560766	0,484953886
TRMT6	116,3008359	-0,370997195	0,264773271	-1,401188245	0,161157789	0,559325751
CHGB	4,828397485	0,520126642	0,434256827	1,197739701	0,231018368	0,648128258
PEBP1	206,8217211	-0,913062798	0,358719785	-2,545337161	0,010917227	0,18685034
BRAP	1591,788424	0,780283228	0,274784842	2,839615248	0,004516798	0,128339684
ERP29	1067,021305	-0,391623027	0,314883186	-1,24370892	0,213606712	0,626127931
NOS1	5,571761059	0,710422399	0,53832948	1,319679537	0,186942035	0,591934824
FUS	548,3191939	-0,401778565	0,338407508	-1,18726256	0,235124071	0,65344723
IGBP1	693,5659139	-0,045329966	0,134942185	-0,335921387	0,736930149	0,975111879
FXYD5	2426,6417	-0,053466328	0,187519194	-0,28512456	0,775548714	0,984851532
ZNF302	33,32272287	0,185684804	0,266773379	0,696039479	0,486404106	0,872776774
GRAMD1A	871,5548332	-0,039925451	0,224810861	-0,177595741	0,85904047	0,997808627
HEPH	7,050655312	1,37155776	0,531143245	2,582274695	0,009815143	0,177269068
CDIP1	249,8425502	0,095172386	0,188896639	0,503833137	0,614378639	0,935855789
CMTM1	2,773854489	0,770850093	0,630478098	1,22264373	0,221464289	0,63496739
KCNH4	2,165883438	-0,492652655	0,733116411	-0,671997855	0,501585062	0,881943427
GANAB	123,3055222	-0,781198712	0,404366604	-1,931907098	0,053370974	0,345523014
GMIP	1268,51071	-0,116044771	0,199769051	-0,580894641	0,561311464	0,913080801
RBM41	74,8410365	-0,030762958	0,192684422	-0,159654619	0,873153151	0,997948431
BIRC5	239,9145061	-0,526682879	0,274695945	-1,917330375	0,055195973	0,35036046
LAG3	55,557227	-1,049935442	0,528096778	-1,988149686	0,046795138	0,326915665
MLF2	1136,407523	-0,033011913	0,195908875	-0,168506471	0,866184853	0,997948431
OTUB2	2,870656906	-0,088770506	0,579024015	-0,153310577	0,87815336	0,99845712
DDX24	428,9938137	-0,59704843	0,302658706	-1,972678854	0,048532163	0,331617403
ZBTB25	150,6539026	-0,165595489	0,24015383	-0,689539236	0,490483991	0,874997058
NECAP1	593,7186036	-0,033781811	0,177975576	-0,189811498	0,849456846	0,996080934
ARHGAP4	650,9244693	-0,240979739	0,162547037	-1,48252311	0,138201159	0,519412134
ANKRD24	47,51634263	0,467892735	0,48451072	0,965701512	0,334193563	0,754787036
DHX32	40,13643772	-0,099920393	0,243629171	-0,410133124	0,681708295	0,960645063
RCOR1	813,1493457	-0,222547187	0,178832435	-1,244445322	0,213335711	0,625740276
GPATCH2L	315,566423	0,134763109	0,154790295	0,870617303	0,383963146	0,798457712
LTBP4	22,33315979	0,328133987	0,228690537	1,434838498	0,151333125	0,54208633
BLVRB	898,5271195	1,456073017	0,32685991	4,454731134	8,39984E-06	0,006240699
SLC9A1	3,081188598	0,595087813	0,445218366	1,336620092	0,181346677	0,584983509
SPTLC1	1084,630646	-0,105585875	0,171782646	-0,614648086	0,538787151	0,902325548
PAPOLA	1124,252282	0,094484458	0,179481212	0,526430913	0,598588842	0,928972145
CCNK	801,0853179	-0,206659489	0,232757485	-0,88787473	0,374608139	0,789449828
PCBP4	54,845985	-0,223231535	0,26437407	-0,844377572	0,398458451	0,809781054
RGS1	14,89001774	-0,422266761	0,561200365	-0,752434937	0,451789543	0,849552373
YPEL3	6430,776588	0,525988523	0,289533016	1,816678905	0,069266294	0,383890583
MRPS33	134,2105141	-0,119431031	0,24543287	-0,48661384	0,626532014	0,941843628
NDUFB2	276,6079844	0,024385482	0,222667789	0,109515086	0,912793957	0,999189109
NUDC	404,5857462	-0,190528183	0,199329688	-0,955844487	0,339150809	0,759586724
MAEA	71,5450728	0,812222262	0,25286554	3,212071763	0,001317815	0,079527012
ICAM1	180,9185311	-0,180146811	0,380683347	-0,473219573	0,636056535	0,946931137
STRN4	114,6746876	-0,04308295	0,198733617	-0,216787428	0,82837401	0,991317608
IRAK3	1578,411672	0,467594108	0,331650755	1,409899122	0,158569472	0,55475557
LYZ	30349,76517	0,424570605	0,2910498	1,45875587	0,144632313	0,53030549
MUL1	227,974576	-0,24394119	0,179838125	-1,356448699	0,174956448	0,574540606
TFAP4	104,8306833	-0,216949601	0,267976489	-0,80958446	0,418179042	0,824304926
PDCD7	76,55985488	0,032485873	0,235794185	0,137772155	0,890420491	0,999189109
SPG21	639,9289967	-0,053515826	0,133805879	-0,399951226	0,689192441	0,962452868
DNAJB11	616,8863817	-0,828628245	0,364606193	-2,272666404	0,023046291	0,253081837
P3H2	2,272330142	0,336340553	0,614893839	0,546989629	0,584385857	0,922355353
THPO	32,67431584	0,297025934	0,665415208	0,446376835	0,655325063	0,953823878
FLT3LG	111,1179784	-0,354221354	0,347592936	-1,019069485	0,30816998	0,729200489
RAB11FIP3	126,8417117	0,102683656	0,212601371	0,482986801	0,629105108	0,94278337
GNPTG	513,9288694	0,286518799	0,149432158	1,917383806	0,05518919	0,35036046
ZNF268	65,98036297	-0,393064001	0,20809094	-1,888904924	0,05890457	0,359923435
GOLGA3	598,9702321	-0,550611284	0,208585615	-2,63973757	0,008297025	0,164331764
PABPC4	684,6703156	0,005683046	0,205202252	0,02769485	0,977905531	0,999884338
CD209	2,535607027	0,51170914	0,994752787	0,51440835	0,606966523	0,932596931
CERS4	30,86623236	0,368569936	0,24546736	1,501502834	0,133225554	0,512070435
MCOLN1	269,7658404	0,708299042	0,208385556	3,398983382	0,000676368	0,05943677
USP48	338,6106555	0,189442809	0,155727164	1,216504584	0,223792766	0,638152959
EFNB1	61,30625863	0,09363757	0,337018554	0,277840994	0,781134421	0,986293275
PDPR	138,1897938	-0,248675393	0,239580851	-1,03796022	0,299288575	0,720664668
AARS	358,8767026	-0,903655192	0,388637981	-2,32518497	0,020062072	0,238656886
GLG1	485,313396	-0,791127326	0,327430986	-2,416165112	0,015684947	0,215776721
TNRC6A	99,33920017	-0,386970537	0,273173265	-1,416575435	0,156607095	0,550719227
PLEKHG2	149,0920538	-0,115250345	0,319321113	-0,360923033	0,718156985	0,971054351
DLL3	45,44934196	0,087347128	0,515191657	0,169542978	0,86536957	0,997948431
NAT14	11,55200648	0,218096685	0,324548409	0,672000477	0,501583393	0,881943427
EXOC1	155,2296819	-0,046713249	0,138122699	-0,338201097	0,735211649	0,974995577
RBM27	428,8028064	-0,205899974	0,185852307	-1,107868807	0,267918479	0,689020286
POU4F3	1,726892476	0,008345403	0,814254634	0,010249132	0,991822519	0,999884338
OSBPL8	3039,978471	-0,115134113	0,201694911	-0,570833008	0,568112845	0,914376422
DTX2	203,8782084	-0,222921649	0,199874996	-1,115305335	0,2647196	0,685397693
NLRC4	134,1290114	0,187964614	0,342109221	0,549428668	0,582711305	0,9218458
PUS7	16,98868309	0,179902865	0,223390113	0,805330475	0,420629	0,826244563
LAMB4	65,04338452	0,836792511	0,256435667	3,263167406	0,001101744	0,076085889
SLC26A4	11,95020863	0,797045638	0,36360718	2,19205143	0,028375793	0,271070918
DLD	472,6655615	-0,119132031	0,107780379	-1,105322058	0,269020063	0,689489297
WDR7	165,3036402	0,012767686	0,182055107	0,070130885	0,944089484	0,999189109
TXNL1	566,1639769	0,41086824	0,206555309	1,989143938	0,046685318	0,326915665
IL5RA	10,83985478	-0,500139654	0,600264784	-0,833198395	0,404732848	0,813903707
ABCC6	6,263757324	0,552938941	0,368853581	1,499074347	0,133854346	0,512862259
CMTM6	1667,474263	0,259738089	0,175540635	1,479646514	0,138967606	0,520633103
ITGA6	181,8978123	-0,245943345	0,297139715	-0,827702701	0,407838889	0,815927374
RAPGEF4	3,049506646	1,454653468	0,681249979	2,135271211	0,032738863	0,284480666
pk	332,1115957	0,36380363	0,244145243	1,490111482	0,136194926	0,516108752
FH	118,5941669	-0,684372822	0,302491739	-2,262451276	0,023669536	0,255280819
SEL1L3	514,8746651	-1,082492441	0,318286403	-3,40100121	0,000671395	0,05943677
TF	26,67080615	0,704588748	0,303173838	2,324042052	0,02012324	0,238863009
CDV3	915,3495048	-0,169308325	0,209808637	-0,806965469	0,419686378	0,825486315
MYO15A	7,132178167	-0,043874965	0,514924302	-0,085206631	0,932097119	0,999189109
ALKBH5	853,5005509	-0,200096044	0,161826956	-1,23648154	0,216279623	0,630253243
NLRP1	600,6220096	0,049167007	0,25886153	0,189935549	0,849359636	0,996080934
SPAG7	339,8676084	-0,00409636	0,238395755	-0,017183022	0,986290607	0,999884338
ORC6	64,21473073	-0,438596907	0,335901255	-1,305731671	0,191643824	0,595969996
ZC3HC1	65,99930541	-0,107868688	0,191015404	-0,564711985	0,572269681	0,916315433
ESR1	13,32892315	-0,290917478	0,549047227	-0,529858752	0,596209867	0,928276841
RGS17	2,392392158	0,164906474	0,726150122	0,227096945	0,82034836	0,990943318
ANGPT2	7,913259968	0,936623548	0,479375628	1,953840566	0,050720075	0,339587749
TMEM101	212,1479492	-0,009922537	0,146910272	-0,067541478	0,946150643	0,999189109
CD200	113,3665945	1,013850445	0,373173797	2,716831819	0,006591009	0,149004208
PSME1	1044,876319	-0,299878205	0,178457759	-1,680387597	0,092881928	0,434876857
PPP2R3C	478,4646698	0,286490588	0,184360238	1,553971677	0,120191173	0,487475116
HAUS4	450,1347925	-0,065643571	0,252096971	-0,260390161	0,794562832	0,987914916
JPH4	7,371683025	0,203972657	0,540753404	0,377200874	0,706024331	0,967745677
MYH7	3,025563074	-0,504668756	0,631562748	-0,799079359	0,424244397	0,828189574
CEBPE	76,02848053	-0,019159994	0,308121147	-0,062183314	0,950416851	0,999189109
SLC7A8	7,736644787	-0,082597233	0,605685907	-0,136369745	0,89152899	0,999189109
OSGEP	113,079576	0,025351482	0,200513757	0,126432634	0,899389471	0,999189109
SLC22A17	31,22873679	-0,100790924	0,344488331	-0,292581534	0,76984203	0,983944853
RNF31	924,278349	-0,489035888	0,203542199	-2,40262653	0,016277802	0,21952201
SCFD1	1175,442671	0,559651995	0,197688067	2,830985217	0,004640487	0,128339684
G2E3	119,7389186	0,517822616	0,192859151	2,684978194	0,007253454	0,157113265
HECTD1	511,1505426	0,184351293	0,206707793	0,891844908	0,372476067	0,787596549
HNRNPC	1454,106804	-0,062087971	0,185326336	-0,335019687	0,737610236	0,975660703
RPGRIP1	2,208746422	0,898199256	0,700870755	1,281547631	0,200001381	0,60683545
SUPT16H	196,6561346	-0,146443029	0,186257074	-0,786241434	0,431726056	0,832899074
TOX4	664,0876285	-0,132580493	0,145792339	-0,909379006	0,3631501	0,781259819
GEMIN2	79,99583713	-0,055733616	0,209256619	-0,266340993	0,789976605	0,987357979
TGM1	4,62700626	-0,093760694	0,409361931	-0,229041067	0,818836997	0,990943318
TINF2	421,8169993	-0,003566085	0,130284412	-0,027371538	0,978163399	0,999884338
SEMA6A	2,395205941	-0,897543176	0,588762421	-1,52445731	0,127394513	0,502087531
TRPM7	323,2154852	0,45786508	0,219819288	2,082915854	0,037258894	0,298674167
TYRO3	44,04111711	-0,016250485	0,585880585	-0,027736854	0,977872029	0,999884338
WDR76	215,7719542	0,359400251	0,209840067	1,712734159	0,086761458	0,423233627
CAPN3	98,2579775	-0,239787938	0,262690164	-0,912816583	0,361339015	0,780353326
SNAP23	2039,042149	0,20549296	0,226246914	0,908268565	0,363736346	0,781259819
PHGDH	44,36687948	-1,290165928	0,487261889	-2,647787476	0,008102044	0,162947943
COL9A3	150,0485625	0,364466382	0,454560734	0,801799089	0,422669186	0,828008072
EZR	1331,039852	-0,62648226	0,341645384	-1,833720841	0,066695443	0,378600264
MYL6	6,5029748	0,402887254	0,382400332	1,053574539	0,292077751	0,712751693
AGO1	174,5577761	-0,201621437	0,216579358	-0,93093561	0,351886873	0,771312526
CLSPN	106,5596984	0,348990525	0,220031139	1,586096067	0,112717519	0,474592439
RFFL	1834,227369	-0,287723762	0,238904225	-1,204347736	0,228455204	0,644202849
UNC13D	326,6403394	-0,008157834	0,179873817	-0,045353096	0,963825867	0,999866967
MFSD11	385,0755455	0,171162034	0,176318231	0,970756308	0,331669645	0,751266677
TGFB2	77,77776036	0,671585255	0,605731699	1,108717369	0,267552127	0,688466548
GPATCH2	76,59764648	0,065429413	0,259801372	0,251843985	0,801161658	0,988674013
NUP50	1043,944675	-0,076986006	0,134362862	-0,572970875	0,566664414	0,914236487
CDC45	41,88714207	-0,97129241	0,388248271	-2,501730161	0,012358808	0,198132807
COMT	196,4823213	0,090855823	0,244683403	0,371319926	0,710399259	0,968437088
CECR1	1762,557643	-0,65238443	0,358744954	-1,818518762	0,068984882	0,383336205
VNN3	267,1377648	0,050959406	0,326485602	0,156084695	0,875966262	0,997948431
ECHDC1	6,791635827	0,921154179	0,444463716	2,072507036	0,038218181	0,302333188
LRRFIP2	979,5759849	0,18485973	0,213344149	0,866486053	0,386223671	0,799920077
SEC22C	104,4473157	-0,152598125	0,171637998	-0,889069595	0,373965678	0,78921485
XYLB	10,37535658	-0,017375336	0,569300907	-0,030520478	0,975651962	0,999884338
HDAC6	120,4987199	0,219037612	0,199735993	1,096635656	0,272800694	0,693241191
OR1I1	82,83669221	0,116662854	0,606265421	0,19242868	0,847406429	0,995583668
GABRP	2,672888616	-0,44336613	0,709228704	-0,625138445	0,531880197	0,898565269
KRT31	7,176191513	-0,036237032	0,653045544	-0,055489287	0,955748664	0,999189109
CDC6	97,1612013	-0,354139264	0,254870092	-1,38948929	0,164684015	0,563820415
UPRT	64,62512902	-0,208856222	0,246602708	-0,846934016	0,397031901	0,808356555
CDC23	76,40635039	-0,045688745	0,203505999	-0,224508101	0,822361964	0,990943318
AAAS	67,95148262	-0,79859177	0,405559495	-1,969111265	0,048940316	0,332768579
CBX5	489,0037926	-0,461717025	0,344300785	-1,341028096	0,179911331	0,582537778
SUCO	517,592053	0,729780702	0,232875918	3,133774885	0,001725732	0,088984846
MSH2	145,0303206	-0,0860435	0,211744921	-0,406354495	0,68448215	0,961518784
MAP3K1	2909,438117	-0,243111387	0,191817451	-1,267410162	0,205008668	0,614162592
DHPS	112,9830227	-0,218435746	0,20610089	-1,059848632	0,289213468	0,708512311
HOOK2	103,5311232	0,015293024	0,265858641	0,057523142	0,954128472	0,999189109
ARCN1	2018,900324	-0,407591041	0,200664996	-2,0312015	0,042234558	0,313498572
TMEM38B	75,24671408	0,060271098	0,192539234	0,313032812	0,754255734	0,979900782
PSMD5	30,56345728	0,689506801	0,670796673	1,027892398	0,304000446	0,724302849
PTGS1	876,3166553	0,031070267	0,345649784	0,089889444	0,928375069	0,999189109
NUP188	223,4762239	-0,883173849	0,350362441	-2,520743508	0,011710718	0,194211445
CRAT	219,0283875	0,14954164	0,167030332	0,895296309	0,370628713	0,786206614
SH2D3C	458,0184286	-0,054681272	0,198549885	-0,27540319	0,783006493	0,98651097
NANS	360,9034953	-0,210998424	0,203862849	-1,035001843	0,300668051	0,721898213
TBC1D2	215,3006567	0,057442629	0,262060152	0,21919635	0,826497098	0,991079912
DFNB31	12,46832638	-0,748926701	0,407809014	-1,836464316	0,066289015	0,378600264
CWF19L1	617,7987605	0,22281882	0,163451492	1,363210682	0,172816122	0,571970071
BTAF1	240,298863	-0,086417287	0,163613747	-0,528178646	0,597375349	0,928492375
IKZF5	377,8982441	-0,186028036	0,100958017	-1,842627671	0,065383391	0,378311844
BLNK	1,732196612	-1,490551179	1,082983655	-1,37633765	0,168717122	0,567956661
TLL2	10,77612089	0,816086729	0,328142633	2,486987816	0,012882981	0,199896371
BAMBI	36,16279258	0,015182428	0,375066162	0,040479332	0,967710984	0,999866967
IL11	12,64291842	0,100638225	0,637009617	0,157985409	0,874468296	0,997948431
WAC	3534,486275	0,079699947	0,136175097	0,585275491	0,558362492	0,912914044
CREM	14,76252029	0,356845889	0,276681628	1,289734672	0,197142797	0,603539805
NUBP2	32,51851363	-0,555321516	0,308210694	-1,801759403	0,071583268	0,390355349
TPSD1	69,65422286	1,439148849	0,65297445	2,203989526	0,027525081	0,267001451
SMIM24	44,26752987	0,979606442	0,557217383	1,758032812	0,078741926	0,405621427
HIVEP1	207,9161885	-0,193549755	0,215577346	-0,897820471	0,369281269	0,785384306
TREM2	2,760836642	-0,419625254	0,525138413	-0,799075527	0,424246619	0,828189574
CRISP3	80,58838091	-0,409631743	0,436977202	-0,937421313	0,348541882	0,767950555
FKBP5	5,391298358	0,741035838	0,373701044	1,982964324	0,047371415	0,328087192
SRPK1	1244,174328	0,005160112	0,276055602	0,018692293	0,985086576	0,999884338
BRPF3	240,4963526	-0,090482656	0,152934593	-0,591642831	0,554089787	0,910760012
MRPS18A	175,6287476	-0,424808384	0,214078894	-1,984354351	0,047216351	0,328004009
TMEM14A	29,68363345	-0,362829361	0,313395486	-1,157736398	0,246971626	0,666298679
RPS18	1113,168437	0,103408112	0,265062724	0,390126951	0,696442675	0,96423841
NCR2	12,71629075	-0,096553102	0,688696865	-0,140196808	0,888504494	0,999189109
HSP90AB1	1190,098091	-0,583769608	0,293942873	-1,985996807	0,047033678	0,327692018
CDC5L	516,4642066	-0,054796568	0,156449488	-0,350250863	0,726150438	0,972669449
ITPR3	71,90589583	-0,616847934	0,381126329	-1,618486805	0,105557728	0,458868836
ZNF184	27,06476976	-0,017322039	0,23788904	-0,072815625	0,941952837	0,999189109
DSP	22,5203496	-2,423123078	0,773909725	-3,131015154	0,001742032	0,089258647
SIRT1	186,6126364	-0,256478596	0,148274429	-1,729756085	0,083673864	0,415336973
HNRNPH3	368,5266873	-0,271970504	0,188002839	-1,446629771	0,148000643	0,536243605
IFT74	39,3429311	0,249324152	0,25264577	0,986852666	0,323714872	0,744251557
IL12RB1	92,15996425	0,60918234	0,1881381	3,237953087	0,001203906	0,076866579
ABL1	176,7280735	-0,443291447	0,303666057	-1,459799136	0,144345286	0,530185101
ACOT7	63,83736234	-0,108529671	0,288784892	-0,375814921	0,707054494	0,967993237
SH3GLB1	10,7422096	1,339971243	0,442095086	3,030957106	0,002437799	0,099721984
SYDE2	11,28960796	0,271642287	0,284103047	0,95614	0,339001508	0,759586724
PCSK5	62,55291727	0,171082992	0,285747089	0,598721731	0,549358464	0,90855652
SCD	60,58835751	-0,917750157	0,418032822	-2,195402155	0,028134763	0,269714191
TMED1	109,4861228	-0,178144255	0,192939613	-0,923316124	0,355842487	0,77510399
ABLIM1	154,4637553	-0,136304141	0,297177323	-0,45866266	0,646476432	0,950592256
ERMP1	378,1598686	0,264604178	0,513302046	0,515494103	0,606207789	0,932596931
RAB18	795,1311246	0,158747122	0,140981826	1,12601125	0,260160758	0,681721531
NRP1	6,504021275	-0,404874638	0,638706581	-0,633897708	0,526147581	0,896007733
HSD17B7P2	30,36061652	0,622667469	0,294779007	2,112319585	0,034659047	0,290860182
PRTFDC1	15,27902454	0,262270723	0,407862453	0,643037184	0,520199972	0,893606784
TSPAN15	54,32107271	0,492900073	0,305675735	1,612493296	0,106854638	0,461152409
H2AFY2	12,96332336	-0,266993742	0,39555259	-0,674989239	0,499682602	0,881465352
FAM21A	833,3993024	-0,342318858	0,280762372	-1,219247634	0,222750217	0,636401381
MAST3	358,3330139	0,02647507	0,210087314	0,126019365	0,899716596	0,999189109
MZF1	6,552987007	-0,213961228	0,320809821	-0,666941017	0,50480981	0,884220978
OCEL1	27,86962897	-0,202562395	0,271529973	-0,74600381	0,455665113	0,851548067
MYO9B	465,3094419	-0,081909871	0,157478918	-0,520132295	0,602971371	0,931174618
KCNK6	18,26325162	0,595684917	0,343850864	1,732393253	0,083203568	0,41449629
CATSPERG	10,73452415	0,244968424	0,386349818	0,634058598	0,526042581	0,896007733
PSMD8	870,4948327	-0,409151711	0,189649388	-2,157411181	0,030973641	0,280179538
FBXL19	33,678495	-0,097976842	0,221449783	-0,442433677	0,658175414	0,954558752
STX1B	65,04600894	0,045003747	0,396506628	0,113500617	0,909633674	0,999189109
HSD3B7	113,5569326	-0,038417379	0,4044609	-0,09498416	0,924327409	0,999189109
SETD1A	135,2591689	-0,596613576	0,334979591	-1,781044551	0,074905173	0,398284012
BCL7C	81,35868901	0,050316832	0,177025622	0,284234745	0,776230491	0,9849868
CIRBP	1183,241775	-0,098285983	0,137162049	-0,716568352	0,473640478	0,863354411
ATP5D	264,4748001	-0,18915743	0,256283308	-0,738079397	0,460466203	0,855458069
PCDH11Y	131,7577439	0,98692053	0,380949094	2,590688742	0,009578408	0,175514664
PRKY	60,31054057	-0,749870796	0,477424309	-1,570659018	0,116261873	0,480274039
HNRNPM	6842,221305	0,885977149	0,308261115	2,874112576	0,004051645	0,123054787
MARCH2	1920,891921	0,562467439	0,260483044	2,159324579	0,030824995	0,279903405
NDUFB7	165,9599151	-0,438593579	0,288133533	-1,522188599	0,127961831	0,502928488
TECR	351,0322312	-0,635058134	0,271101161	-2,342513519	0,01915434	0,23469092
TIMM13	84,65214951	-0,098762574	0,262500451	-0,376237732	0,706740166	0,967962797
CDC34	276,8321647	1,237936363	0,317606463	3,897705199	9,71085E-05	0,024800608
MTAP	44,29238661	0,061482569	0,34599401	0,177698362	0,858959872	0,997808627
MISP	2,393484102	-0,375820079	0,757822653	-0,495920882	0,619950232	0,938842047
POLR2E	621,0724623	0,279674659	0,16612102	1,683559724	0,092266788	0,434294538
POLRMT	59,64030833	-0,633303591	0,338833109	-1,869072334	0,061612751	0,369021774
HCN2	1,993536035	-0,93578404	0,904782116	-1,034264519	0,301012519	0,722262129
CDHR5	21,34998197	0,313117235	0,649217468	0,482299462	0,629593229	0,94278337
IZUMO4	170,9929241	0,107102415	0,450169078	0,237915975	0,811946265	0,990466579
RASSF7	25,10459091	0,193495966	0,262882902	0,736053825	0,461697942	0,85648086
GADD45B	1176,131396	-0,322083965	0,296831008	-1,085075195	0,277888352	0,69845996
PALM	6,132200899	1,343309654	0,548026484	2,451176529	0,01423901	0,206309554
MADCAM1	8,20362578	0,805454693	0,556994514	1,446072937	0,148156745	0,536466234
MKNK2	1,030632141	0,567742883	0,764267402	0,742858955	0,457567078
ARVCF	3,791952374	-0,165802181	0,54614198	-0,303588054	0,761441754	0,981516115
TRMT2A	109,9919972	-0,303134934	0,282075923	-1,074657244	0,282528213	0,702459678
RANBP1	160,2773821	-0,519620371	0,295561622	-1,758077953	0,078734247	0,405621427
ZDHHC8	9,683393261	0,319629119	0,41551707	0,769232222	0,441755465	0,84154931
KLHL22	52,33818924	-0,178963692	0,209062881	-0,856028057	0,39198226	0,804387953
MED15	5,643992346	-0,152007936	0,691286683	-0,219891313	0,825955802	0,991079912
SNAP29	505,9800662	-0,11412898	0,139073611	-0,820637214	0,411852944	0,81854771
CRKL	430,2309112	-0,041904582	0,123592681	-0,339053911	0,734569118	0,974995577
LZTR1	135,7617419	-0,220751558	0,266213273	-0,829228221	0,406975279	0,815038363
MMP11	17,47064157	0,161537604	0,512654536	0,315100312	0,752685491	0,979275997
CECR2	165,6488128	-0,244715526	0,562674278	-0,434915075	0,663624072	0,956717066
SMARCB1	69,05508158	0,004625063	0,184641147	0,02504893	0,980015935	0,999884338
P2RX6	32,49345962	0,235284901	0,59494108	0,39547597	0,692491652	0,963244455
DERL3	11,35542769	-1,743687911	0,561216492	-3,106979103	0,001890098	0,092370901
SLC7A4	7,082780987	0,437404828	0,677400701	0,645710622	0,518466781	0,893446445
BCL2L13	121,3778856	0,126566143	0,217190389	0,582742836	0,560066432	0,912914044
DDTL	3,258709526	-0,476632421	0,619566632	-0,769299695	0,441715418	0,84154931
DDT	130,2624195	-0,123260755	0,222788463	-0,553263634	0,580082899	0,920523819
OSM	272,1374453	0,100996673	0,364888643	0,276787657	0,781943159	0,986293275
CABIN1	183,7674981	-0,571646873	0,338151624	-1,690504593	0,09093146	0,432433727
TBC1D10A	3,4589542	-1,619546216	0,755425249	-2,143886795	0,032041958	0,282516884
SUSD2	2,42183443	0,540651876	0,568994665	0,950187953	0,342016759	0,761729621
SF3A1	1266,029291	-0,27211032	0,192990179	-1,409969778	0,158548607	0,55475557
GGT5	7,967017725	-1,073644097	0,635907494	-1,688365222	0,091341142	0,432712029
RNF215	22,0122585	-0,002690644	0,310720107	-0,008659381	0,9930909	0,999884338
SEC14L2	25,67321293	-0,092279032	0,480556691	-0,192025277	0,847722405	0,995583668
SPECC1L	126,1585302	0,194710905	0,153544239	1,268109478	0,204758857	0,614162592
PPIL2	2,303563082	-0,026406728	0,978056987	-0,026999172	0,978460395	0,999884338
UPB1	71,31966383	0,02832379	0,255594829	0,110815194	0,911762897	0,999189109
YPEL1	74,25346363	-0,050343704	0,255155757	-0,197305774	0,843588261	0,994837671
SNRPD3	422,0899364	-0,130567988	0,226527037	-0,576390305	0,564351396	0,913466894
PES1	168,3229356	-0,427073561	0,314137995	-1,359509413	0,173985222	0,573910807
MAPK1	1093,917917	-0,092009098	0,208358137	-0,441591097	0,658785128	0,954934632
GGT1	234,2764007	-0,091500838	0,252716258	-0,362069456	0,717300128	0,970860811
PRODH	127,5538861	0,323520792	0,648627742	0,498777298	0,617936282	0,93810466
PPM1F	173,3868224	0,230120776	0,219863601	1,046652448	0,295259903	0,716028206
SLC35E4	7,941886352	-0,06164784	0,441361149	-0,139676634	0,888915489	0,999189109
TOP3B	7,891242256	-0,688577993	0,409881352	-1,679944669	0,092968082	0,434956838
CRYBB3	1,468396919	0,912482968	0,717189497	1,272303864	0,203265176
CYTH4	1284,320045	-0,067201112	0,251441581	-0,26726332	0,789266426	0,987206421
DGCR14	226,3930542	-0,3461267	0,151538567	-2,284083225	0,02236664	0,249118629
CRYBB2P1	106,3565173	0,640033334	0,204066944	3,136389081	0,001710421	0,088984846
MFNG	564,8252708	-0,204692524	0,203742322	-1,004663745	0,315058791	0,735872527
LRP5L	12,33256595	0,81929838	0,494501175	1,656817862	0,097556305	0,443431926
SLC25A1	134,2003881	-0,610384269	0,224741988	-2,71593339	0,006608921	0,149087831
ADRBK2	179,8869265	0,34814536	0,199518954	1,744923743	0,080998144	0,410589868
LGALS2	43,7353377	0,175875804	0,487275514	0,360937086	0,718146479	0,971054351
GGA1	274,8491676	0,650607973	0,20656301	3,149682861	0,001634478	0,086930338
HIRA	344,414292	-0,445171736	0,178500317	-2,493954882	0,01263286	0,198132807
SH3BP1	673,6389684	-0,330891177	0,204257395	-1,619971593	0,105238379	0,458088231
LGALS1	1114,602454	-0,626680899	0,341371941	-1,835771554	0,06639145	0,378600264
HPS4	116,9301978	-0,101643495	0,203820144	-0,498692095	0,617996315	0,93810466
PIK3IP1	1,429813584	0,428938727	0,786007574	0,545718313	0,585259582
SRRD	320,7747189	1,028286069	0,286005108	3,595341628	0,000323966	0,041517999
PATZ1	23,71673002	-0,661468038	0,487344746	-1,357289768	0,174689157	0,574487947
TRIOBP	397,7219694	0,068294476	0,17423804	0,391960771	0,6950872	0,964168229
TFIP11	138,9192699	-0,305936999	0,212246689	-1,441421779	0,149465561	0,539058826
GCAT	9,02743222	0,367868953	0,395702721	0,929659903	0,352547201	0,771822426
CRYBB1	1,254383627	0,091003387	0,848690367	0,107228019	0,914608088
ANKRD54	72,13785339	-0,415850854	0,211151295	-1,969444964	0,048902017	0,332765805
EIF3L	1102,95164	-0,30951105	0,234369338	-1,320612385	0,186630641	0,591515102
NHP2L1	384,4741469	-0,324626737	0,262245718	-1,237872405	0,215763376	0,629984348
MICALL1	146,0677739	-0,401260741	0,268060759	-1,496902203	0,134418707	0,513334992
POLR2F	171,6401118	-0,089778896	0,160050056	-0,560942609	0,574836662	0,917569543
CCDC134	414,1949304	0,215727432	0,261911773	0,823664511	0,41013021	0,817861229
DEPDC5	55,35508075	-0,361268198	0,191440253	-1,887106771	0,059145966	0,360993584
PICK1	81,56890935	0,358182675	0,256548857	1,396157748	0,162666997	0,560786364
TTC28	21,79784065	0,384749231	0,242400578	1,587245518	0,112457049	0,473861941
SLC16A8	2,26836137	0,082624241	0,72709538	0,113636042	0,909526315	0,999189109
CENPM	35,10145336	-0,389317385	0,347139863	-1,121500084	0,262075056	0,682974615
KDELR3	1,572884496	-0,495486041	0,755950531	-0,655447705	0,512179545
CYP2D6	3,789925553	-0,216771111	0,609024683	-0,355931568	0,721891814	0,971732498
DDX17	4048,043703	0,212802518	0,178598865	1,191511036	0,233453027	0,65186054
DMC1	1194,139557	0,521660961	0,387829989	1,345076389	0,178600567	0,580108742
TCF20	63,67265977	-0,104803689	0,162143669	-0,646363126	0,518044215	0,893162854
HSCB	73,95004903	0,40803894	0,207791773	1,96369151	0,049565878	0,334774493
CBY1	35,84459176	-0,052651799	0,179974931	-0,292550737	0,769865573	0,983944853
TOMM22	296,1989869	0,06154814	0,232174594	0,265094209	0,790936888	0,987357979
RSPH14	4,573509933	0,552793635	0,684139586	0,808012936	0,419083135	0,824893286
XBP1	1921,130642	-0,756841844	0,306440746	-2,469782014	0,013519541	0,203637021
RTCB	402,9646148	-0,589579353	0,248745231	-2,370213699	0,017777807	0,226774995
JOSD1	268,4490093	-0,166211356	0,211550844	-0,785680423	0,432054735	0,833168316
FBXO7	4591,819328	1,315370693	0,351124037	3,746171022	0,000179554	0,031900146
GTPBP1	1036,623571	-0,324829984	0,198571393	-1,635834747	0,101874178	0,453082898
POLDIP3	292,2434002	-0,367017579	0,214698752	-1,709453714	0,087366938	0,42507628
RAB36	68,05613701	0,953153315	0,291472454	3,270131707	0,001074974	0,075453582
TIMP3	7,394997393	0,637606116	0,548885025	1,161638755	0,245382233	0,665078809
PPP6R2	132,5118105	-0,323733153	0,131174715	-2,467953939	0,01358878	0,203637021
SUN2	803,6249239	-0,428784682	0,2705242	-1,585014139	0,112963122	0,475343391
CYB5R3	3,394098327	-1,085667262	1,005885849	-1,079314579	0,280447516	0,70036893
DNAL4	96,95915456	-0,093448127	0,190184758	-0,491354448	0,623175776	0,940430991
MIOX	79,05102035	0,775239541	0,356694839	2,173397133	0,02975044	0,276688571
LMF2	8,49664045	0,515207387	0,522904415	0,985280239	0,324486437	0,745010648
RHBDD3	110,5761266	0,254663824	0,270177276	0,942580469	0,345895534	0,76639047
PACSIN2	1476,906602	0,038143428	0,22329025	0,170824423	0,864361824	0,997948431
TTLL1	17,81021376	-0,103220349	0,259560277	-0,397673904	0,690870576	0,963176353
RASL10A	10,7917421	0,551821918	0,636653031	0,86675456	0,386076504	0,799920077
AP1B1	619,6265616	-0,429574162	0,244770122	-1,755010613	0,079257492	0,406483751
TOM1	922,8809659	-0,086740522	0,18832606	-0,460586934	0,645094988	0,950173702
NEFH	7,375101878	-1,238745288	0,628483334	-1,971007377	0,048723032	0,332288619
CHKB	442,0686398	-0,264064404	0,241122607	-1,095145774	0,273452778	0,693711882
BIK	29,9458619	-0,347033505	0,333375132	-1,040969982	0,29788948	0,719269568
HMOX1	401,1017053	-0,083534203	0,29704357	-0,281218689	0,778542671	0,985844434
MCAT	18,12651405	-0,719632906	0,300162638	-2,39747662	0,016508434	0,219819486
THOC5	632,3383299	-0,066790187	0,175059611	-0,381528252	0,702811312	0,96646903
MCM5	208,9378033	-0,825808175	0,40577619	-2,03513216	0,041837577	0,312110996
APOBEC3H	2,190734284	0,061700772	0,645045948	0,095653298	0,923795934	0,999189109
ARSA	94,38550004	-0,360072899	0,230194638	-1,564210628	0,117768112	0,483463349
TSPO	468,7059824	0,204052755	0,222262323	0,91807173	0,358581314	0,777467269
TTLL12	159,7853214	-0,306852234	0,231251548	-1,326919697	0,184535248	0,588578336
CBX7	118,9957981	-0,212586946	0,175635297	-1,210388517	0,226129846	0,641885509
PDGFB	29,85340262	0,472732929	0,387310937	1,220551458	0,222255895	0,635878278
ACR	8,060259692	0,437176846	0,721586154	0,60585537	0,544610798	0,906018869
CABP7	7,791101466	0,241957527	0,575596577	0,420359565	0,674222802	0,958142435
RPL3	5902,563459	-0,201158088	0,278631998	-0,721948982	0,470325845	0,860666808
ZMAT5	29,8834656	-0,072828721	0,183885731	-0,396054224	0,692065027	0,963244455
RBFOX2	3,22430757	-0,001131723	0,439784581	-0,002573359	0,997946759	0,999884338
SYNGR1	1,558275236	0,909474868	0,640078505	1,42088019	0,155351593
TAB1	126,2126951	-0,36951183	0,274147145	-1,347859484	0,177703581	0,579060162
ASCC2	1388,218403	1,411823417	0,353938735	3,988892081	6,63826E-05	0,019928045
MTMR3	1715,982456	-0,031330969	0,221160995	-0,14166589	0,887343919	0,99909705
MIEF1	73,33932996	-0,73028119	0,378391676	-1,929961032	0,053611666	0,346356792
APOL1	295,6808445	0,871135877	0,316939031	2,748591346	0,005985196	0,142528128
PNPLA3	4,70656439	0,532938726	0,501179817	1,063368292	0,287614966	0,707033633
MYH9	14460,35932	-0,299042623	0,209597528	-1,426746899	0,153652862	0,545850039
CACNA1I	15,24627287	-1,072190142	0,460244722	-2,329608771	0,019826838	0,237115245
SAMM50	4,937114938	1,435022659	0,459257797	3,12465606	0,001780131	0,090642479
TXN2	322,6033358	-0,176555058	0,206185864	-0,856290795	0,391836951	0,80429172
FOXRED2	55,41048664	0,089005827	0,266966659	0,33339679	0,738834786	0,976332329
GRAP2	1919,506955	0,511203493	0,292438895	1,748069436	0,080452005	0,409453018
EIF3D	525,4131121	-0,34041003	0,192811576	-1,765506187	0,077478731	0,404456528
TNRC6B	16,96729239	-0,184489822	0,594553832	-0,310299609	0,756333128	0,979950684
SGSM3	106,2254012	-0,043549097	0,225908439	-0,192773221	0,847136577	0,995583668
IFT27	14,34215985	-0,202351846	0,314513676	-0,643380118	0,519977481	0,893606784
PVALB	30,70698657	0,614555682	0,482812047	1,272867332	0,203065123	0,612719114
KIAA0930	1343,175163	-0,433196502	0,77424461	-0,55950858	0,575814677	0,918022627
NCF4	3808,805003	-0,026797737	0,236377002	-0,113368631	0,909738308	0,999189109
SLC25A17	94,09629855	-0,253924693	0,226793552	-1,119629244	0,262871788	0,683652097
UPK3A	2,614604775	-0,616740522	0,701624933	-0,879017397	0,379391843	0,793447528
FAM118A	71,58125775	0,455622445	0,347130876	1,31253794	0,189338693	0,594523376
KCTD17	41,86973261	0,094146054	0,287757448	0,327171561	0,743538129	0,977949975
ST13	454,3294678	0,617792362	0,247598511	2,495137635	0,012590828	0,198132807
IL2RB	368,2238556	-0,893938322	0,474253022	-1,884939645	0,059437987	0,362505185
RBX1	907,4227626	0,366438248	0,258872272	1,415517563	0,156916803	0,551333865
EP300	1540,077007	0,564968889	0,300046563	1,882937377	0,059708855	0,363343722
L3MBTL2	62,81135794	0,32854115	0,299171888	1,098168522	0,272130909	0,692020696
RANGAP1	91,5583255	-0,646221197	0,395164732	-1,635321031	0,101981767	0,453082898
ZC3H7B	62,94278786	0,938233672	0,347731897	2,698152461	0,00697255	0,15505623
PHF5A	186,580605	0,223054131	0,232766307	0,958274993	0,33792411	0,758287971
ACO2	389,6692876	-0,6071671	0,330353375	-1,837932185	0,066072399	0,378600264
POLR3H	134,2699354	-0,513664694	0,288282814	-1,781808243	0,074780508	0,397880012
TRMU	45,50025805	-0,378448269	0,245512409	-1,5414629	0,123204166	0,492846815
PMM1	54,13243694	-0,343964877	0,177545558	-1,937333056	0,052704644	0,344789961
DESI1	215,3855901	0,223084297	0,138683869	1,60858144	0,107707895	0,46340762
CERK	5,064218626	1,093058265	0,448795297	2,435538587	0,014869639	0,210427915
ZBED4	12,5629679	-0,256881303	0,34834105	-0,73744195	0,460853633	0,855860379
MLC1	20,70352756	0,063933608	0,486116294	0,131519164	0,895364628	0,999189109
HDAC10	527,7459239	0,134646956	0,334412545	0,402637274	0,687215084	0,962238135
ABHD4	298,7451935	0,02462866	0,18169099	0,135552459	0,892175091	0,999189109
KHNYN	519,4480954	0,088097833	0,168062678	0,524196298	0,600142016	0,929544225
FKBP3	566,7211242	0,579976008	0,261046445	2,22173494	0,026301224	0,263064524
SDR39U1	8,837352832	-0,359971408	0,347925126	-1,034623202	0,300844914	0,722178018
CTSG	165,8844376	0,011285734	0,529424591	0,021316981	0,982992798	0,999884338
GZMH	410,4512328	-0,948006997	0,499716168	-1,897090904	0,057815942	0,357531172
GZMB	848,0954965	-1,338784744	0,442189655	-3,027625654	0,002464832	0,099721984
RBM23	1345,388395	-0,13540554	0,213374808	-0,634590094	0,525695791	0,895632286
PRMT5	784,0814636	-0,243604846	0,219023094	-1,112233606	0,266037722	0,68668953
COCH	36,69498624	-0,240788093	0,274183982	-0,878198979	0,379835746	0,794013442
AP4S1	90,19111534	-0,05585691	0,190423485	-0,293329943	0,769269969	0,983944853
POLE2	268,9456088	0,869019015	0,327430421	2,654057044	0,007953038	0,162947943
VCPKMT	262,9692799	0,052963902	0,217885376	0,243081489	0,807942271	0,990017231
SOS2	421,7142483	0,252194048	0,357092934	0,706242054	0,480037622	0,868232259
CDKL1	49,63358675	-0,145871661	0,243818804	-0,59827896	0,549653813	0,908585313
NIN	1159,629283	0,041860242	0,192596558	0,21734678	0,827938103	0,991303244
PYGL	3048,564317	0,074817418	0,281034119	0,266221833	0,790068369	0,987357979
TRIM9	17,20588546	-0,137416331	0,320031664	-0,429383545	0,667644127	0,957469923
PSMC6	2071,369538	0,477059083	0,277876148	1,716804726	0,086014857	0,422008514
GNPNAT1	152,8762011	-0,339583838	0,245924368	-1,380846646	0,167326118	0,566006911
DDHD1	189,5397032	-0,135891805	0,157949338	-0,860350585	0,389595817	0,802800908
CDKN3	754,8090545	0,565530702	0,383503486	1,474642922	0,140308569	0,523098116
CNIH1	324,066061	0,200046181	0,208793391	0,958105907	0,338009357	0,758340638
CGRRF1	58,35957687	0,685787344	0,247992646	2,765353554	0,005686113	0,140244198
ATP6V1D	597,0985822	0,310354862	0,169362884	1,832484512	0,066879267	0,378642751
C14orf105	6,747637854	1,338146439	0,487961021	2,742322403	0,006100643	0,143474834
PLEK2	65,50043101	1,701159554	0,593072528	2,868383671	0,004125749	0,123502656
PIGH	155,2644143	-0,206617913	0,228491182	-0,90427084	0,365851805	0,783307117
PSMA3	30,60696566	-0,359194107	0,269677699	-1,331938488	0,182880402	0,587375854
VTI1B	485,8098753	0,765292324	0,234739482	3,260177267	0,001113426	0,076085889
TIMM9	119,8482689	-0,236231115	0,213718971	-1,105335261	0,269014344	0,689489297
GSTZ1	26,44106775	-0,809211817	0,422801647	-1,913927778	0,055629385	0,351993026
KIAA0586	59,61183278	0,060112498	0,198801049	0,302375157	0,762366091	0,981995409
TMED8	221,7325637	0,476022802	0,23276119	2,045112426	0,040843775	0,309787244
SAMD15	9,4998569	-0,611963907	0,575827534	-1,06275555	0,287892822	0,707078615
AHSA1	225,6747863	-0,180839148	0,250397998	-0,722206846	0,470167315	0,860666808
DAAM1	376,5794461	0,154189236	0,138925988	1,109866033	0,267056759	0,688005912
ISM2	39,46067283	0,528401809	0,635067069	0,832040954	0,405385828	0,814308881
SPTLC2	2385,384107	0,057558828	0,289403795	0,198887607	0,842350664	0,994764366
RIN3	845,1961153	-0,22490183	0,203473352	-1,105313433	0,269023799	0,689489297
LGMN	107,8161288	-0,151146425	0,233885094	-0,646242232	0,518122493	0,893162854
ALKBH1	57,76884541	-0,4025658	0,215774247	-1,865680472	0,062086083	0,370499099
SNW1	1072,144726	-0,249896943	0,161337894	-1,548904209	0,121404749	0,489754931
ITPK1	1532,342703	-0,077166706	0,218302475	-0,353485255	0,723724681	0,971732498
DHRS7	474,5734891	0,167835133	0,160354359	1,04665152	0,295260331	0,716028206
PPM1A	1242,627732	0,699081404	0,243543516	2,870457881	0,004098778	0,123054787
SIX4	192,0528556	0,816465876	0,349817223	2,333978498	0,019596848	0,236818657
GALNT16	3,992281828	1,145720466	0,536657983	2,134917402	0,032767758	0,284480666
ASB2	1,982278976	-1,140199283	0,939410295	-1,213739394	0,224847256	0,639375156
CEP128	108,2282869	-0,584285378	0,288803591	-2,023123661	0,0430604	0,315615351
ERH	1025,393751	-0,216816654	0,194811973	-1,112953434	0,265728429	0,686615629
HIF1A	1483,008548	0,022386247	0,20933177	0,106941469	0,914835414	0,999189109
SUSD6	1006,487754	-0,287672863	0,211327612	-1,361264912	0,173429987	0,573153307
SRSF5	2541,220455	0,119804599	0,121809878	0,983537634	0,325342902	0,746033914
EIF5	471,587829	0,421983341	0,150839169	2,797571379	0,005148839	0,133311398
SLC8A3	9,169822065	-0,030745594	0,434051246	-0,070834018	0,943529858	0,999189109
DICER1	605,3258221	0,351009611	0,302833761	1,159083484	0,246422157	0,665747134
ZFYVE21	221,0984354	0,299992105	0,172637463	1,737699913	0,082263704	0,413074173
MTHFD1	216,8327145	-0,178069828	0,262457534	-0,67847101	0,497473099	0,879470424
TCL1A	109,7073735	-0,514484134	0,367191544	-1,401132847	0,161174351	0,559325751
ZC3H14	71,0369511	-0,155855946	0,170276847	-0,915309087	0,36002939	0,779242751
[truncated: 15,020 more rows]
