# Supplementary material for: Effects of IFIH1 rs1990760 variants on systemic inflammation and outcome in critically ill COVID-19 patients in an observational translational study
Source: eLife. 2022 Jan 21;11:e73012. doi: 10.7554/eLife.73012 (PMC8782569; doi:10.7554/eLife.73012)
Supplement: Supplementary file 3. [file elife-73012-supp3.csv]

	baseMean	log2FoldChange	lfcSE	stat	pvalue	padj
HLA-DRB3	444.219956765344	25.8870643783844	3.30422932137722	7.83452413877696	4.70621658669659e-15	6.71671231253337e-11
USP17L19	22.2567506680888	-33.4532649726984	4.78556219307815	-6.99045663246949	2.73992983686289e-12	1.95521393158536e-08
MTHFS	71.8831236261512	22.1735225093462	3.3919404044358	6.5371203103536	6.271459935544e-11	2.9835425400028e-07
E2F6P1	44.898894766941	-30.4203974981919	4.78583334161476	-6.35634284079101	2.06613617069648e-10	7.37197385704505e-07
ZNF107	243.469070458336	-1.88693499122878	0.347587026651352	-5.42866921532568	5.67758000425059e-08	0.000162060843641329
DNAJC25-GNG10	92.7679510186946	-25.310020324764	4.78500888381275	-5.28944061324222	1.22691009175623e-07	0.000291841013825749
USP17L5	78.9586109104806	-24.2883168719215	4.72881255643194	-5.13624014106576	2.80289460858212e-07	0.000571470169338344
USP17L24	78.7639083672635	-24.2964546074028	4.78521638688633	-5.0773993573177	3.82636069413362e-07	0.000682622747833439
MAOA	320.090159523653	-4.48472663773428	0.943980884536495	-4.75086594569797	2.02547381560874e-06	0.00321195136626311
EXOC8	13.171833070455	-21.7826630172553	4.78701103562981	-4.55036824756128	5.35521107218642e-06	0.0058791978786342
PCBD2	29.558860624279	1.68245547210101	0.366467371664788	4.59101028410237	4.41105598729494e-06	0.0058791978786342
TAS2R43	13.4098998730105	-7.48425240687541	1.64437875454331	-4.55141638518311	5.32859741357114e-06	0.0058791978786342
TAS2R43.1	13.4098998730105	-7.48425240687541	1.64437875454331	-4.55141638518311	5.32859741357114e-06	0.0058791978786342
ABCF1	36.6335158495455	20.9736678737993	4.78775603366974	4.38068851593578	1.18304888249398e-05	0.0120603383221101
TMEM71	377.205470125587	-1.46216570105934	0.339352141448111	-4.30869743393947	1.64218842314108e-05	0.0156248754500463
HECW2	54.2727703906525	-2.52013741179781	0.603954368052058	-4.17272818131284	3.00973929005751e-05	0.026189535715018
USP17L1	124.106173957776	-3.7528128237789	0.901130905791324	-4.16455899987515	3.11954951762406e-05	0.026189535715018
SNX6	643.199666073168	-1.31471899765628	0.31898337267491	-4.1215909990273	3.76264786467579e-05	0.0298336168470294
GJA1	14.3669928736332	-4.70367797586354	1.14495522592823	-4.10817634554242	3.98795565040931e-05	0.0299558437066535
PGPEP1	189.792186829539	1.18609955739415	0.29424340024525	4.03101499100929	5.55365009380526e-05	0.0360280427903585
MAP3K10	27.1544408559727	2.68144028306752	0.663659344728799	4.04038653921657	5.33631768212262e-05	0.0360280427903585
LIPN	291.4227412381	-2.23754907328617	0.554295702689041	-4.03674259502862	5.41984780873142e-05	0.0360280427903585
TRIB3	90.6150432774596	2.09614521932838	0.523970275963273	4.00050406575984	6.3207701127257e-05	0.0392217526299223
ABCG1	61.4930069918446	-2.55503634988701	0.642687442243392	-3.97555044948178	7.02166562060932e-05	0.0417555048905568
NSMAF	629.41925118534	-1.16950580228061	0.298870062630855	-3.91309116739843	9.11221125538092e-05	0.0511039951681108
MPZL3	534.899922072358	-1.32240658477831	0.338392434249248	-3.90790824774845	9.30986459060315e-05	0.0511039951681108
MKLN1	811.759510303805	-0.858420521099353	0.221677184244693	-3.87239004331544	0.000107773300830982	0.0562072764000265
PRKCA	321.028064467012	1.48358546674575	0.383672520073165	3.86680147554699	0.000110272122982115	0.0562072764000265
UBXN11	28.2121988447107	-2.57040510498825	0.668174612561707	-3.84690626770988	0.000119618705276703	0.0588689021279003
HSF4	31.9598867033702	-3.67245087828139	0.956957753091334	-3.83763114559446	0.000124226892840783	0.0590988738207886
TMEM154	1578.61540396796	-1.38156040662033	0.361715217848754	-3.81946995439383	0.000133738747906474	0.0602487405834333
SLED1	254.528928180125	-2.23083514583166	0.584448001244735	-3.81699508096617	0.000135086862294693	0.0602487405834333
ALPK1	620.313529356452	-1.49197011091272	0.393663420941833	-3.78996379024296	0.00015066924670183	0.0621223535476346
MAP2	22.9865509077938	5.00046279641662	1.34731344791032	3.71143240956462	0.000206089701302518	0.0621223535476346
FOXRED1	106.146228967244	1.4328507523963	0.386890757718016	3.70350214837811	0.000212643379722301	0.0621223535476346
OR5V1	10.4887642037121	-4.08899896305867	1.10177609917207	-3.7112794206839	0.000206214318649521	0.0621223535476346
RAB11FIP5	37.1229699383905	2.43960199747237	0.646330029564036	3.77454533424346	0.0001602997565021	0.0621223535476346
GOLGA1	1013.10697781351	-1.83684910904251	0.490105746874583	-3.74786282502529	0.000178347742075961	0.0621223535476346
BBS7	97.7837234497827	-4.52843919975721	1.21976011305796	-3.71256540632758	0.000205169016201887	0.0621223535476346
BAG3	106.367752838668	2.42006687434949	0.643307079916307	3.76191549868274	0.000168617020330139	0.0621223535476346
FYCO1	186.887833648856	1.45343549224733	0.38947491654191	3.73178202373639	0.000190129990811255	0.0621223535476346
PCBD1	64.2696672145208	1.46753139166336	0.391120057467575	3.75212511770768	0.000175341912409107	0.0621223535476346
TMC8	435.003496832254	1.43687864434533	0.387068950225146	3.71220332581453	0.000205462825747756	0.0621223535476346
BEST1	221.486594374763	-1.48446413482898	0.398723315509009	-3.72304321590504	0.000196835814191011	0.0621223535476346
NABP1	944.479847033999	-1.71923555394326	0.464314562079181	-3.70273882051986	0.000213284425717075	0.0621223535476346
OR5V1.1	10.4887642037121	-4.08899896305867	1.10177609917207	-3.7112794206839	0.000206214318649521	0.0621223535476346
OR5V1.2	10.4887642037121	-4.08899896305867	1.10177609917207	-3.7112794206839	0.000206214318649521	0.0621223535476346
MDC1	162.451612248906	1.96490536614072	0.527221081343933	3.72690970765434	0.000193841860863246	0.0621223535476346
OR5V1.3	10.4887642037121	-4.08899896305867	1.10177609917207	-3.7112794206839	0.000206214318649521	0.0621223535476346
C1orf101	10.8791708867828	-2.2358907466542	0.60574257698019	-3.69115665899	0.000223236585076631	0.0637206508442737
LRRC6	91.5618149496549	-2.13573475078025	0.580605375755696	-3.67846189505299	0.000234644738344682	0.0656637197187313
UBE2D4	60.1629472143261	1.49175316432824	0.407044663308074	3.66483901841306	0.00024749420598478	0.0667098619075307
FBXL2	95.7213141579138	-3.34892457163	0.917393739451598	-3.65047681013381	0.000261753942462284	0.0667098619075307
NBPF1	43.6918804399108	2.00288585997906	0.547363834877704	3.65914905654401	0.000253054127815244	0.0667098619075307
TAS2R46	27.8201511383478	-4.82887615001706	1.32275022782286	-3.6506333912828	0.00026159440766444	0.0667098619075307
RPS19P3	62.9588015915486	-2.73940938017306	0.748262691030245	-3.6610262853027	0.000251206982283116	0.0667098619075307
MARK3	45.0038852096446	-1.44829798204651	0.400781398507512	-3.61368563371428	0.000301875045336679	0.0704066008557885
TBC1D13	251.777067860947	1.46575862886882	0.406798425723398	3.60315708268118	0.000314375409913872	0.0704066008557885
CDK2	227.849401820534	1.25280852999158	0.347804874455814	3.60204419777545	0.000315724667514747	0.0704066008557885
RPTOR	84.5552884355825	1.90250615289543	0.527099727006874	3.60938557813106	0.000306923117584724	0.0704066008557885
C4orf29	386.179105345312	-1.16964734637423	0.322303532649556	-3.62902428266585	0.000284494482027428	0.0704066008557885
MTHFR	122.951446796796	1.09981264056764	0.304145505795599	3.61607395016637	0.00029910496161644	0.0704066008557885
SULT1A2	110.234547264417	-2.89946392565377	0.804671687712322	-3.60328811107662	0.000314216907241694	0.0704066008557885
ADARB1	88.5814216610757	1.23736525021127	0.341431514234135	3.62405108675104	0.000290024280290376	0.0704066008557885
RP11-44F14.1	150.080408699968	-1.98274180839271	0.551997868119206	-3.59193743836077	0.000328228656506868	0.072068913625631
ITCH	721.123679830747	-0.741572088211396	0.207128934983491	-3.58024381417546	0.000343273755049371	0.0742303489706761
TELO2	64.4076249542184	1.40439969387413	0.39338634477471	3.57002654649445	0.000356945052955421	0.0760346238176085
TTC26	27.4201512904016	-1.4212361784432	0.400441087793905	-3.54917669980626	0.000386437672423346	0.0787891208689428
GDF11	23.5489632070191	2.4044841496464	0.676477780455296	3.55441703943045	0.000378818002701778	0.0787891208689428
DDIT3	27.0130669280691	-2.71088906346203	0.763207853707038	-3.55196693835729	0.000382362900951751	0.0787891208689428
AGAP4	302.082613310454	-1.5945261759694	0.449955514053379	-3.543741828176	0.000394491338658391	0.0792983152863741
PKN2	1199.96973073573	-1.26170860775741	0.357367279435775	-3.53056555639185	0.000414672240335237	0.0821972529731182
ZC3HAV1L	22.2415982975637	2.46229017807331	0.700958304070133	3.51274842423003	0.000443497187471402	0.0843945581278912
HSPA4	2161.97632791136	-1.22061647015811	0.347242763853361	-3.5151674771071	0.000439476742667841	0.0843945581278912
TMEM189	412.916829689152	1.14212468416811	0.324485239747441	3.51980473767333	0.000431864607890537	0.0843945581278912
CD40LG	122.017593800274	2.40878285102725	0.691049606435482	3.48568732055583	0.000490874408240233	0.0861614003278253
COMP	26.740151825181	-3.38109666407771	0.970239699333856	-3.4848055242422	0.000492494849976016	0.0861614003278253
USP42	115.364167963287	1.17963020193018	0.337615082284636	3.49400919516876	0.000475824629402267	0.0861614003278253
HIST1H1A	35.0845668511294	-3.46384888254517	0.992284318366798	-3.49078265012424	0.000481607880869316	0.0861614003278253
TOM1L2	219.142789968467	0.93002512813048	0.266887754571807	3.48470513239773	0.000492679651989662	0.0861614003278253
BCL9L	188.903119949579	2.28841924782848	0.654712935414084	3.49530171781489	0.000473526139885228	0.0861614003278253
DPPA5	11.4845540824355	-3.79279040284669	1.08881067570069	-3.48342506873925	0.000495041677892494	0.0861614003278253
RSBN1L	492.649392467744	-0.673256668163026	0.194089831397099	-3.4687889793957	0.000522809925041166	0.0898981114480425
FOXP4	45.5194947063874	2.06764796248349	0.597450030783126	3.4607881093809	0.000538596560695308	0.0901609589323249
ATP6V0E2	17.6443745582199	2.567019526819	0.74188374855956	3.4601371600377	0.000539900304327847	0.0901609589323249
HLA-B	4618.72940936394	6.38126774905783	1.84512292918855	3.45845127612402	0.000543290531683011	0.0901609589323249
RAI1	35.8320125661437	2.38195483106003	0.690638142693167	3.44891873734561	0.00056283605588765	0.0923309906853855
NPW	7.68578847555296	-3.88594530918406	1.1290360102218	-3.44182583549366	0.00057780213371782	0.0937090005956901
RNF14	390.554745538577	-1.00400313220995	0.292317429200356	-3.43463314847983	0.000593356494734325	0.0940107361757018
LAG3	70.5499147166072	2.10416835968137	0.618426689646508	3.40245399318731	0.000667835982260628	0.0940107361757018
ZDHHC2	355.393466388863	-1.24542744833972	0.364308938661994	-3.4186024996088	0.000629436055747493	0.0940107361757018
BAG1	986.981612412931	-1.62839252899215	0.478688023291409	-3.40178247576676	0.000669479016311605	0.0940107361757018
CD5	478.47500037532	2.70992920283931	0.797538737561046	3.39786530134768	0.000679138498304488	0.0940107361757018
ST8SIA4	564.668752386859	-1.10963406996329	0.325230518802287	-3.41183869843978	0.00064526283537835	0.0940107361757018
MTERF4	147.668656795871	1.07034580150975	0.313534085794243	3.41381001302731	0.000640612305188923	0.0940107361757018
VAV3	221.79251043543	-1.22340665261782	0.360399349813812	-3.39458618127322	0.000687324037784362	0.0940107361757018
C9orf78	4477.27766969767	-1.36709240022537	0.40258339362729	-3.39579928498247	0.000684285185674233	0.0940107361757018
RIT1	1094.6236446711	-1.07367800050438	0.314265696311864	-3.41646579026847	0.000634396340238413	0.0940107361757018
FBXW5	438.811334379698	0.902757987064273	0.26627882988724	3.39027322392306	0.000698229963188368	0.0940107361757018
CTBP1	930.959598737889	0.958042087288042	0.281028054612584	3.40906209029119	0.000651866412481509	0.0940107361757018
ALKBH4	46.1633893829607	1.35221547273211	0.397992538486744	3.39759000978646	0.000679822197540565	0.0940107361757018
BDH1	88.5754341807745	1.86555134424507	0.546716235287534	3.41228451586758	0.00064420836772723	0.0940107361757018
KIF27	222.159081500192	-1.99726136874734	0.586406593316602	-3.4059326609055	0.000659384409562761	0.0940107361757018
DNAJC21	213.154544692145	0.838752367516602	0.245331434089708	3.41885405198383	0.000628854466951956	0.0940107361757018
LILRA5	55.8982339397691	-2.63459544448947	0.772199127065239	-3.41180836930277	0.000645334629520112	0.0940107361757018
LA16c-60H5.7	22.5747213926011	-4.00016688759299	1.17977362224056	-3.39062241449008	0.000697341037552571	0.0940107361757018
SPECC1	34.6545686876313	-2.15885136805052	0.638542530048057	-3.38090458577292	0.000722476258026374	0.0945979922436
MELK	239.030863552575	-1.89697822105126	0.561057200100943	-3.38107811593892	0.000722020134285689	0.0945979922436
USP39	410.872601725161	0.648783028689842	0.19175374865145	3.38341770762006	0.000715896582668311	0.0945979922436
COQ4	153.041751588933	1.15430062377271	0.341905916064542	3.37607677883764	0.000735273973914723	0.0953984559610085
RMI2	48.9442151862832	2.13317739795918	0.63335825982655	3.36804228075176	0.000757039854121377	0.0973375927749576
PTBP1	1049.62850607861	1.36215655418048	0.406185896474998	3.35352991327782	0.000797877889436784	0.0997172920547406
NFATC3	594.269034283094	1.28662458917388	0.383139735675977	3.358107941751	0.000784779608553939	0.0997172920547406
RGS2	6043.30884993008	-1.29909489548531	0.3877024238191	-3.35075257639209	0.000805922756592008	0.0997172920547406
MED10	213.646823589098	1.05528201508732	0.314820329414526	3.3520135661183	0.00080226087442432	0.0997172920547406
C10orf131	127.017884289042	-2.03938474945856	0.608918830320066	-3.34918982286456	0.000810482474660167	0.0997172920547406
BAHD1	69.9274351358042	1.76938790589472	0.530219973434127	3.33708271009624	0.000846627493338485	0.103274081922452
LGALS4	15.4521346381403	-2.9435303327182	0.883798656808628	-3.33054402158429	0.000866764571031588	0.104834440320024
ITPRIP	13.8256861526145	-2.22492669421002	0.66855742563322	-3.32795151007813	0.000874870927527545	0.104925696451035
CDK20	30.1701282435205	-3.33849209604837	1.00529071717244	-3.32092203679995	0.000897205961365466	0.10657547787934
FLNA	9733.7003251942	1.49356593534965	0.450011398315828	3.31895134420891	0.000903561716886221	0.10657547787934
C4BPA	50.8491204645867	-4.0488971536498	1.22240036118904	-3.31225127397001	0.00092548380257146	0.107855173529726
APOBEC3A	848.396606554442	-1.28850227786227	0.389154267176512	-3.31103211898698	0.00092952538846387	0.107855173529726
H2AFY2	17.4047551762417	2.27151027576921	0.688091825062204	3.30117317636183	0.000962814345072908	0.109200687354382
SFXN1	361.449892025041	1.34320498440566	0.406552767960744	3.30388842546351	0.000953537738365223	0.109200687354382
CYP4F12	19.1463410899136	-2.04212750803096	0.618675431614224	-3.30080588896623	0.000964075575017664	0.109200687354382
USP17L14P	30.1591764182813	-5.03104176003247	1.52891920693121	-3.29058706125525	0.000999785586337041	0.112353857387419
TAF5L	133.925396412743	1.09965545775774	0.334778234291513	3.28472805313921	0.00102080848329453	0.11382014588734
NPIPB3	207.351691881282	-1.53215376384179	0.467759414357008	-3.27551667976137	0.00105468886094297	0.116356174446763
IFFO2	171.76395801474	2.08137881534934	0.635703368550268	3.27413526232519	0.00105985865177124	0.116356174446763
MTHFD1L	26.7624550226214	-1.30968576647791	0.401674691522846	-3.26056332180794	0.00111191136648161	0.11842685837631
SLC41A1	47.9946110613475	1.93002506168432	0.591549288746331	3.26266145256402	0.00110371283669193	0.11842685837631
ADIPOR1	5540.97730072141	-1.30949478400917	0.401236741762647	-3.26364624101101	0.00109988404462279	0.11842685837631
HEXA	83.1395771778517	1.50545080926284	0.461008971377127	3.26555642673451	0.00109249236542503	0.11842685837631
ZBTB37	159.398491731184	-0.981246023262553	0.301809282011807	-3.25121221163823	0.00114914049212735	0.121485430397345
ADAM11	8.36880246474896	-5.02701741887445	1.54937358824552	-3.24454828519889	0.00117637071269387	0.121952019926879
IVD	148.39707382758	1.38906830055733	0.428001578914277	3.24547471082003	0.00117254978616451	0.121952019926879
SKIV2L	10.8743035768132	-6.47156237522076	1.99501479806332	-3.24386685327001	0.0011791885334858	0.121952019926879
ABCB8	17.3410425313817	1.78401976746983	0.550833950611852	3.23876145522291	0.0012004993326597	0.123262780400858
PIGC	128.546294724434	1.01396260842785	0.313724483696247	3.23201618337694	0.0012292009438759	0.12417180251217
POC1B	295.121555732155	-1.1616254935606	0.359406002976277	-3.23207037150481	0.00122896786570484	0.12417180251217
INTS1	99.0707982547817	1.38176417675448	0.427715816648209	3.23056600427513	0.00123545375257344	0.12417180251217
SDHA	397.671245197807	1.12962215650547	0.350315120794047	3.22458863307127	0.00126153798851893	0.124938635637927
LOXL3	55.824508290597	1.50486150636848	0.466939123839431	3.22282162607125	0.00126934572361963	0.124938635637927
MEMO1	1434.85621397066	-1.39997612295008	0.4340370834431	-3.22547583225941	0.0012576345336463	0.124938635637927
HAUS4	322.941896234553	-1.21915692172058	0.379418820085611	-3.21322205747593	0.00131254767740925	0.126553800769968
HDAC1	1132.35109030321	0.927388222077343	0.28837808880522	3.21587616423844	0.00130046936073256	0.126553800769968
EIF2B2	158.970658324078	0.97320101506369	0.303052391286106	3.21132927192417	0.00132122451756763	0.126553800769968
BRE	12.9516432266266	1.83957465457554	0.572498875808445	3.2132371473705	0.00131247871462686	0.126553800769968
OSGEPL1	90.561478624964	-2.09055123310178	0.651569546890822	-3.20848517718105	0.00133436187246936	0.126941035686127
FLVCR1	373.10762388948	-1.55698497304662	0.485553747544035	-3.20661714778633	0.00134305608104016	0.126941035686127
TENM1	99.2883820257311	-2.70976347771463	0.845680319854456	-3.20424091006515	0.00135419112140988	0.127151418978696
NTPCR	59.3235558664119	1.08044676606973	0.338270953938176	3.19402760861104	0.00140302698691948	0.128072286413676
KLHL8	188.29255137615	-1.03709958624715	0.324490733249772	-3.19608383222723	0.00139306629912691	0.128072286413676
CXCL1	83.849827727553	-1.91159390079753	0.598663445765379	-3.19310275968761	0.00140752848424593	0.128072286413676
ZBTB2	159.703832257492	0.947327912377188	0.296704935192018	3.19282829510101	0.00140886693994865	0.128072286413676
BTN3A2	614.526747034483	1.11449752646296	0.348691445690942	3.19622847143426	0.00139236810353915	0.128072286413676
TWSG1	282.776139000807	1.68610222778992	0.52843544113742	3.19074402761613	0.00141906944829884	0.128183285861526
PRKAB1	134.920730095215	1.0515592185089	0.330601001017314	3.18075025566492	0.00146894204402246	0.130215781691233
RNF144B	260.255013005973	-1.49778916659734	0.470832702820862	-3.1811493926054	0.0014669196289387	0.130215781691233
SSH3	102.22909561976	-1.81894876793982	0.571678299327057	-3.18176983467969	0.00146378096125899	0.130215781691233
FBXO11	1066.57219045399	-1.01201752981954	0.318678985448243	-3.17566446496644	0.00149493753855305	0.131702151544624
NDE1	1022.76683301641	-1.18598696549507	0.374970269910801	-3.16288266207664	0.00156215281447608	0.133347963812069
PPP1R13B	30.3328279331585	2.33171230768433	0.738694840917492	3.15652983955897	0.00159658550581411	0.133347963812069
DNAJC3	1253.72384518293	-0.763991471583662	0.24109334601557	-3.16886170526798	0.00153037194315356	0.133347963812069
WHSC1	287.405365310711	1.54481651304881	0.49011904764914	3.15192098829567	0.00162200157218196	0.133347963812069
ZNF750	13.7742003778467	-3.42630097614986	1.0818076289977	-3.16719986466018	0.00153914496424184	0.133347963812069
PARP8	1239.47151302677	-0.830839221870626	0.263359172877754	-3.15477609073555	0.00160621324025576	0.133347963812069
USP25	878.195956281943	-0.595587018658084	0.188198905156275	-3.1646678186758	0.00155260096900531	0.133347963812069
ZNF707	85.5133340694555	1.28958161761992	0.408475675978863	3.15705853115879	0.00159369353196389	0.133347963812069
WBP2NL	12.8381289363892	-2.617546147299	0.82903289900859	-3.15734894288179	0.00159210701565631	0.133347963812069
TEKT4P2	12.0923319519544	2.37744672192601	0.75210794003828	3.16104457267796	0.00157204440442568	0.133347963812069
GYPE	8.91339323115849	-2.73169725469185	0.866861791029302	-3.15124888760902	0.00162573890858323	0.133347963812069
RPL6P27	1833.62292859145	1.5869045689522	0.50336333652879	3.15260261086066	0.00161821936528401	0.133347963812069
KIF9	16.3065151904447	-1.3606027266637	0.432474118369699	-3.14609052627883	0.00165468781142818	0.133914653711694
ZSCAN29	164.075688031663	0.852412747732063	0.270845372152828	3.1472302478592	0.00164825113311496	0.133914653711694
PDCD1	39.3057456139995	2.31616826355672	0.736457553065141	3.14501257257368	0.00166079692453544	0.133914653711694
TMEM255A	5.37472099515898	3.41065442728997	1.08936077042865	3.13087685904818	0.00174285223432223	0.134118252950067
PTPN22	1726.8795804711	-1.32940651894223	0.423961702570381	-3.13567596054632	0.00171458536085174	0.134118252950067
TMBIM4	654.672819406701	-0.755715046011988	0.241301522157715	-3.13182875621503	0.00173721168878213	0.134118252950067
SMAD3	313.23749609801	1.22097974589474	0.389101012825158	3.13795057234504	0.00170133563982538	0.134118252950067
GPT	115.506799471198	-2.82991062408998	0.902977005012118	-3.13397861560384	0.00172453423261951	0.134118252950067
TSEN34	19.2085275590038	15.3258555565652	4.8897499651813	3.13428205239467	0.00172275177066833	0.134118252950067
FAM43B	89.9313133178934	-2.82859965012493	0.903697933360903	-3.13002779546614	0.00174789763513961	0.134118252950067
TMEM262	80.3047138952772	-3.19396576085371	1.01744664166002	-3.13919731028113	0.00169411335185495	0.134118252950067
GNL1	309.941581419258	1.16893435881309	0.372579960828783	3.13740534035395	0.00170450303219757	0.134118252950067
HJURP	102.016239048926	1.49342352012165	0.47809684886238	3.12368408968855	0.00178602101376184	0.134860621097138
PKDCC	14.0703377014168	-2.83826516628377	0.908958140449623	-3.12254771697166	0.00179293038946527	0.134860621097138
MZT2A	331.057473110675	1.72868610848249	0.553356871779547	3.12399862844964	0.00178411288399932	0.134860621097138
SLC35A4	388.798257948446	1.25895204241398	0.40323272825633	3.12214747016685	0.00179536981561492	0.134860621097138
LGALS3BP	171.930043884688	2.09864798349957	0.673765699107157	3.11480383504326	0.00184067277241665	0.137539695329479
KCTD10	213.275219194604	1.22552376217735	0.393702422780147	3.11281742571779	0.0018531061635272	0.137747558155522
RAB26	105.940387071759	-3.04555402245201	0.980902134229128	-3.10485003159408	0.00190375522733339	0.139335356946164
TYMS	485.562530045092	1.58368382124416	0.509846367945174	3.10619810361082	0.00189509708533599	0.139335356946164
LHX4-AS1	100.746161367121	-1.33190637179432	0.428659127913255	-3.10714571337404	0.00188903261884763	0.139335356946164
C16orf59	61.7393774588092	-2.88224694599757	0.929418283451801	-3.10113002650764	0.00192783616060881	0.140377947368413
UNG	71.6833626996191	2.00258383773616	0.646643431279276	3.09689040492436	0.0019556216029714	0.141245375940581
CALM2	3890.16373621498	-0.803853336830465	0.259674288670071	-3.09562159945608	0.00196400824133568	0.141245375940581
PACS2	60.7337218769756	2.65084586826847	0.856547621031701	3.09480267434	0.00196943874805042	0.141245375940581
KAT2B	544.549985281359	-1.18511120917133	0.383268140180104	-3.09212033281563	0.00198732271435958	0.1418153488967
RSAD1	64.9236691787735	1.58526050457682	0.513921889274527	3.08463316636433	0.00203803350951943	0.144243879346554
PVRL3	9.72716292274245	3.29847965788282	1.06950512937541	3.08411766085604	0.00204156835958548	0.144243879346554
FAM50B	17.3319063709935	2.15852758681619	0.700760598279056	3.08026391911467	0.00206817241625091	0.145386474912743
RGL3	10.4429657439351	-2.63802052888326	0.856824120230353	-3.07883551197653	0.00207811385105099	0.145386474912743
RNF40	61.5711330448704	-3.12296962866115	1.01503714638925	-3.07670476865832	0.00209302489145552	0.145715371955381
SPPL2C	20.557694397674	-5.41257187700425	1.76070973023604	-3.07408528734526	0.00211149059929066	0.146287348704254
CD2	633.847351144673	1.8083457263121	0.588609999971456	3.07223072390852	0.00212465431713535	0.146488243546646
ERMARD	53.3650097082452	-1.62194318153948	0.528190385980807	-3.07075483497803	0.00213518392639097	0.146506466333904
PICALM	584.729022296226	-1.05252064043288	0.343304693668249	-3.06584984081218	0.00217052290789961	0.147512871150206
HLA-A	1054.9495657885	8.23202360989805	2.68500701042551	3.06592257596879	0.00216999498003244	0.147512871150206
TTC23	16.2141483182811	-3.33221268193758	1.08946565670066	-3.0585752395618	0.00222392225811995	0.148249527944724
SUPT7L	241.902844557951	0.764845194534787	0.250323321390665	3.05542923562099	0.00224738629925502	0.148249527944724
PCYOX1L	148.677264196409	1.15855987901871	0.378454400132416	3.06129319308574	0.00220383175920205	0.148249527944724
RICTOR	792.397330231969	-0.938276953565887	0.306850729985922	-3.05776347219032	0.00222995512770845	0.148249527944724
ZNF581	110.405006411876	0.896880239267753	0.293622219273653	3.05453804377069	0.00225407424075148	0.148249527944724
RNPC3	673.720619717503	-1.16097422242387	0.379435018312491	-3.05974453171775	0.00221525863187107	0.148249527944724
DDRGK1	427.550538700921	0.676007149268924	0.221210277046019	3.05594820591582	0.00224350007286177	0.148249527944724
NUDCD3	334.766294054344	1.23899597508755	0.41052139133168	3.01810332238327	0.00254362164681474	0.149059240103398
APBA2	36.7898239312683	1.83437656390697	0.608087644106227	3.01663186497261	0.00255600018776942	0.149059240103398
DCUN1D1	1540.44162632914	-1.30154883299726	0.432149411631736	-3.01180285791156	0.00259701197425287	0.149059240103398
YBX1	4296.55443877873	-1.15165989131254	0.382679447156412	-3.00946366435462	0.00261709380944165	0.149059240103398
SNX10	74.8010150641367	-1.72402750271528	0.566183249337447	-3.04499913187604	0.00232680981541168	0.149059240103398
UIMC1	248.699960248156	-1.1700696513608	0.383568687874688	-3.05048271235075	0.00228473832996107	0.149059240103398
CEBPE	152.97260562841	2.1990212914246	0.730499325231554	3.01029886745967	0.00260990740334696	0.149059240103398
NRP1	10.2897191279951	3.29265828438978	1.07988372116486	3.04908595236349	0.00229538798630946	0.149059240103398
GATA3	60.7039985326195	2.48387314076901	0.818129540077955	3.03603893893421	0.00239708405277974	0.149059240103398
UNC93B1	27.0588480197284	-2.55588098816055	0.848329651611367	-3.01283938773772	0.00258815855763882	0.149059240103398
ITK	589.574813146385	2.07733026111502	0.687846517899005	3.02004910551867	0.00252733705863665	0.149059240103398
GNLY	2753.26479522137	1.91366238246234	0.631959871028621	3.02813908001395	0.00246064811508374	0.149059240103398
DOCK6	43.4240944707315	-1.46133681315419	0.483669520818844	-3.02135394159254	0.00251647014122096	0.149059240103398
GPS2	543.214924397128	-0.735687729687538	0.242259471889536	-3.03677591612596	0.00239123148357762	0.149059240103398
SLC22A14	22.6374224411513	-2.77175804930959	0.916851171309599	-3.02312756535012	0.00250176760250194	0.149059240103398
SLC39A4	39.0406341274473	-2.75623860194677	0.906104259901752	-3.04185591429139	0.00235124413702106	0.149059240103398
C11orf49	71.8161561573569	1.53153832937737	0.507353314290052	3.01868202343464	0.00253876840148197	0.149059240103398
PAN3	210.183249625453	-0.932583643516772	0.307942882321472	-3.02843058584876	0.00245827544916377	0.149059240103398
SEPN1	166.0319858292	1.24002352436508	0.407494880231218	3.04304074608612	0.00234200619341452	0.149059240103398
ATMIN	258.662555987037	1.05088333865168	0.344864404945175	3.0472363154404	0.00230956059762006	0.149059240103398
PGM2	316.796956774312	-0.824556799560359	0.273539087495289	-3.01440209920478	0.00257486297047016	0.149059240103398
TCEA2	137.650835200169	-2.27021482715605	0.748334345728239	-3.03369054235616	0.00241582098580354	0.149059240103398
HCFC1	443.567091993075	1.65729927324666	0.545544213399558	3.03788259968739	0.00238246752586927	0.149059240103398
KCNK7	38.5804746549042	-1.99983237749763	0.664731267266805	-3.00848248905215	0.00262555932250395	0.149059240103398
HEG1	126.839084588339	2.06523625802823	0.678906170961742	3.04200542926662	0.0023500765559995	0.149059240103398
ZBTB4	215.82312721107	1.64356341524786	0.546057553475581	3.00987213671308	0.00261357690031913	0.149059240103398
GAPT	219.657022250611	-0.937726502383213	0.308931300428918	-3.03538845394196	0.0024022606513578	0.149059240103398
DMAP1	101.922038817172	0.986948871051857	0.326887292035874	3.01923291329278	0.00253415626337664	0.149059240103398
CMTR2	59.9318363204722	-1.29880037174764	0.429061724418518	-3.02707115976805	0.00246935819525233	0.149059240103398
OR2T29	19.168772486623	-4.16183544565808	1.38370583392229	-3.00774582546987	0.00263193164980776	0.149059240103398
XRCC6	1685.95080928185	1.30268133626044	0.432551936999775	3.01161831639449	0.00259859111803695	0.149059240103398
ZRSR1	26.1165010895779	-8.98372314751668	2.97301381146936	-3.02175627737048	0.00251312804550245	0.149059240103398
RPL7P32	47.8890977304999	-2.44393395744827	0.811577996613342	-3.0113359007349	0.00260100948243322	0.149059240103398
GNG10	1309.88848054329	-1.85205001943914	0.615493054775638	-3.00905104463649	0.0026206508190036	0.149059240103398
CH17-264B6.4	22.5825927056159	-2.05254469630799	0.680935815446832	-3.01429980586511	0.00257573137066494	0.149059240103398
IL18RAP	1221.41290457219	-2.13354823665794	0.709751480968029	-3.00604971439861	0.00264665722536967	0.149300758578956
ZMYND10	26.4245151555709	-2.37558722667071	0.795407695713271	-2.98662841643799	0.00282072342840273	0.150202644359641
CYB5R4	386.616982737862	-1.09008843501176	0.363769311549868	-2.99664760165542	0.00272966057490474	0.150202644359641
EVI5	151.05859264792	-1.05530509863452	0.353295810601329	-2.98702975514579	0.00281702303020342	0.150202644359641
PIGB	181.32147370474	-1.01989247673516	0.341462504698431	-2.98683592693699	0.00281880959917783	0.150202644359641
EIF5	406.086974209679	-1.02338347025919	0.342959791274898	-2.98397507898792	0.00284529945028936	0.150202644359641
BCL7B	100.12882235563	0.985716877286394	0.330523363590917	2.98229107490991	0.00286099846133657	0.150202644359641
SLC16A10	18.9151425092899	2.4802914978167	0.830882691639195	2.98512837344522	0.0028345933633384	0.150202644359641
PPM1G	13.132756943468	-3.52070926833135	1.17371762324588	-2.9996220544043	0.00270314795824847	0.150202644359641
MRPL19	125.65355664587	1.20303947113755	0.401882998561128	2.99350675556026	0.0027579140304495	0.150202644359641
DSTN	374.136335638009	1.13289503694222	0.379593756324866	2.98449333811659	0.00284048386691475	0.150202644359641
HAPLN3	67.8869322896108	2.01972497890448	0.676165633155643	2.98702696479631	0.00281704874229992	0.150202644359641
FN3KRP	61.8259513574461	1.67178354759361	0.560088701568452	2.98485497549229	0.00283712799787718	0.150202644359641
AK4	13.2791512739918	1.73338465694861	0.581259372583008	2.98211906544539	0.00286260645080034	0.150202644359641
ALKBH3	50.1605766939324	1.49600407130393	0.500308637625115	2.99016238937074	0.00278829169965731	0.150202644359641
REG1B	10.3704807592049	-3.21761360116587	1.07506360278581	-2.99295185217701	0.00276293333772402	0.150202644359641
UBA7	516.908523232794	1.0811289538557	0.362331261061585	2.98381362592929	0.00284680116912777	0.150202644359641
AP2A2	342.231507749454	1.01054795600905	0.338178960014418	2.98820469483368	0.00280621539489302	0.150202644359641
RRP7A	402.210773771746	1.17097797314951	0.392333781416666	2.98464732993744	0.00283905443356699	0.150202644359641
SRGAP1	12.8881419816942	-3.53786513710688	1.17945881342021	-2.9995664934223	0.00270364103370372	0.150202644359641
RAD51	111.160209082419	1.55894497564857	0.523131435458032	2.98002541996664	0.0028822446440129	0.150679104613011
SYTL3	254.914219427441	-0.818474627240206	0.274974500169125	-2.97654737707241	0.0029151403688851	0.15074233095916
ARHGAP8	31.3601632214013	-1.76445496354592	0.592739475719666	-2.97677991060682	0.00291293039678859	0.15074233095916
IKBKE	263.573106876054	1.28182605203689	0.430471557131649	2.97772531262705	0.0029039611416021	0.15074233095916
RASGRF2	36.1684373712092	2.16482512356206	0.728183113852996	2.97291310712691	0.00294987949097992	0.151988014784352
ICAM2	543.317948296163	1.19651819889689	0.402922182429239	2.96960120607662	0.00298186571525633	0.153083408230714
TGFA	83.3270594828779	-1.12892095366607	0.380435442032077	-2.96744422032815	0.00300286763083626	0.153119784130913
MTRNR2L8	99.0618872829956	-1.73340869277814	0.584165418066069	-2.96732507466249	0.00300403163933965	0.153119784130913
PRMT5	628.177465772061	-0.930780439294934	0.313984573661865	-2.96441455208977	0.0030325945043106	0.153790390462805
SMAD7	112.96467699106	1.12770723021061	0.380494772156235	2.96379165427157	0.00303873949765352	0.153790390462805
TMCC3	734.222874172139	-1.22548291900832	0.414644502321886	-2.95550263453629	0.00312160031046964	0.153961169607702
GPBP1	1438.9105805408	-1.07658282764838	0.363857737282242	-2.95880152416074	0.00308837941158484	0.153961169607702
RAPGEF3	14.0899319869873	-2.21377718053399	0.75214258757769	-2.9432945522518	0.00324739283492924	0.153961169607702
EZR	1511.97005431873	1.18160602408934	0.400844226587127	2.94779354601108	0.00320050729596383	0.153961169607702
TAB1	141.814809581823	1.24381825157214	0.42240030289333	2.94464337040555	0.00323327107800686	0.153961169607702
PYGB	478.663227649773	1.22470204450114	0.414606642618316	2.95388910502477	0.00313796743868339	0.153961169607702
PXMP4	54.1363610699508	1.36633946321608	0.461756577559279	2.95900379034812	0.00308635305218836	0.153961169607702
NRF1	155.548517868826	0.944639690235013	0.319911424840254	2.95281636380043	0.00314889223802611	0.153961169607702
NDUFS7	91.2809199807246	1.01363280386355	0.343885724535036	2.94758616465998	0.00320265485162527	0.153961169607702
ABCG2	34.613411748331	-1.82169143241641	0.619008084142186	-2.94292026079253	0.00325132151254883	0.153961169607702
EIF2S2	469.656987207694	-1.25729349545033	0.427132765405207	-2.94356602275075	0.00324454610422022	0.153961169607702
CGREF1	19.604560610093	-3.4929733129134	1.18249033300121	-2.95391278510335	0.00313772667096174	0.153961169607702
LMTK3	15.4407427133732	2.3867449581258	0.809813668319529	2.94727670265014	0.00320586195446569	0.153961169607702
GULP1	7.11760750271163	-2.37460658334645	0.807058598736853	-2.94229760647244	0.00325786667751725	0.153961169607702
CLEC18C	15.3122991570471	-3.10250057656588	1.05208277916395	-2.94891299240855	0.00318893741673194	0.153961169607702
SLC29A4	58.7009334946415	-1.79891868906014	0.607784321100611	-2.95979778781156	0.00307841027804535	0.153961169607702
METTL7B	80.3411002292124	2.66492288776825	0.901925448652021	2.95470417399923	0.00312968988657962	0.153961169607702
TMEM229B	122.794598991956	1.80551556418405	0.61271276669099	2.94675688566912	0.00321125565406436	0.153961169607702
ZDHHC18	1250.6282325824	-1.18762237077016	0.40334585269999	-2.94442688035649	0.00323553389318841	0.153961169607702
PPP1CB	3130.70575056549	-0.668964006330549	0.226320518324756	-2.95582570808108	0.00311833252240118	0.153961169607702
AP3S1	492.600111357359	-1.46611163383908	0.498667935178643	-2.94005595790686	0.00328152977243622	0.154567633373629
MAP3K9	31.3637425199296	2.17204114026936	0.740849793754701	2.93182391164778	0.00336977754089975	0.15500591780722
BCL2L12	132.586507732317	1.34305400457565	0.457986719013624	2.93251736091434	0.00336226123665096	0.15500591780722
LRRC46	8.26913205286274	-2.19554827061898	0.748047079781217	-2.93504022669418	0.00333504449167867	0.15500591780722
LEAP2	12.7170430352023	-2.32141784178851	0.790594939506466	-2.93629231074724	0.00332161160931513	0.15500591780722
MICALL2	70.3092535938615	-1.68002266500384	0.572762785048463	-2.93319103276182	0.00335497392256259	0.15500591780722
CENPV	23.6684665322062	1.56107300360555	0.531803311236844	2.93543302687393	0.00333082505047626	0.15500591780722
KCNK4	74.0716479313853	-2.88238164980126	0.983258677735848	-2.93145813514561	0.00337374835700538	0.15500591780722
CKMT1B	8.19099665720097	-4.31842630682393	1.47331626192645	-2.93109254164976	0.00337772144324869	0.15500591780722
MID2	24.3387222153969	2.45355642267035	0.838269859304665	2.92692907353909	0.00342326939485104	0.156592630779853
MADD	10.7313091710507	-2.67344386028222	0.915378198451972	-2.920589396605	0.00349369946784564	0.159303766150457
CRAMP1L	48.5362763451119	1.21776601727041	0.418196991351029	2.91194351574911	0.00359187581127939	0.159323756661547
SH3YL1	52.8235325203649	1.48982845740453	0.510999798133765	2.91551672397047	0.00355100074875544	0.159323756661547
MYO9A	201.567666788021	1.22481898596645	0.420077549452028	2.91569732199251	0.00354894610970061	0.159323756661547
CDC45	60.1817940539187	1.7363512074989	0.596139870371313	2.91265740440643	0.00358367536293111	0.159323756661547
POMT1	56.5516357222258	1.25181131512194	0.428922408809202	2.91850294928	0.00351716548129563	0.159323756661547
PPIL1	25.3703261114638	1.48856704557911	0.510509988398859	2.91584313609178	0.00354728799181148	0.159323756661547
LRIG1	96.9219462293684	1.63070970498606	0.560053014448272	2.91170596875106	0.00359460829911843	0.159323756661547
MSS51	19.3852298779345	-1.95963333413162	0.672694243884597	-2.91311149448129	0.00357846808950068	0.159323756661547
HLA-C	2333.14487070619	7.72573736237342	2.64649509066464	2.91923358921977	0.00350893179677866	0.159323756661547
GPR124	10.1921114942497	1.87050734655319	0.642867601728602	2.90963075682084	0.00361855985754028	0.159395328045725
BRD7	233.940277227611	0.709469555652953	0.243767681493867	2.91043320962465	0.00360928099639486	0.159395328045725
TMCO6	147.430957742911	-1.03586309619448	0.356297160564789	-2.9073010139976	0.0036456220216804	0.160057433277699
COL1A2	6.91100228009851	4.5151678360563	1.55352060330984	2.90641001248169	0.00365602040698779	0.160057433277699
KDM2B	174.652882621553	1.60288641322955	0.551833975585702	2.90465336341115	0.00367660032497748	0.160466176874858
ZNF329	51.2955256144158	1.86756085728701	0.643487979995908	2.90224668578718	0.00370496662761749	0.16121123082121
RCAN3	537.322563076503	2.06686202490524	0.713054696223882	2.89860235946935	0.00374829936232474	0.161618515103017
CCDC138	68.4866380580431	-1.17614563775567	0.405627774673681	-2.89956879481897	0.00373676333731067	0.161618515103017
COG8	104.726922002906	1.20671708710864	0.416301839912674	2.8986590291356	0.00374762202253158	0.161618515103017
UBAP1	658.047034709447	-0.930976173413834	0.321285930705378	-2.89765621348526	0.00375962454857459	0.161618558907399
GNAO1	16.1377115774897	2.61565217886158	0.90401297206328	2.89337903292663	0.00381121065837185	0.163263566718365
OPTN	704.064310728624	-1.08053525229974	0.373552569735737	-2.8925922074747	0.0038207701291994	0.163263566718365
ESPL1	45.3784458490104	1.77971526298556	0.615684868731501	2.89062693168392	0.00384474232730434	0.163797499985933
IL11	6.24299476167376	-3.22913612667571	1.12157633001784	-2.87910509543685	0.00398805410345739	0.164282462034586
POLI	140.746606515791	-1.60518935341467	0.557801468140886	-2.87770729389554	0.00400576631082092	0.164282462034586
AEBP1	36.3625005559009	-2.45063264884535	0.849533587925708	-2.88468011586101	0.00391811556232639	0.164282462034586
ENO2	77.3094553049574	1.59765353703326	0.55342478195921	2.88684856391382	0.00389121467753449	0.164282462034586
MASTL	522.138196079122	-1.48224289793722	0.513657370677375	-2.88566461332492	0.00390588142141834	0.164282462034586
BCL11B	187.202941603918	2.22503548653722	0.773142182443218	2.8779124164534	0.00400316264203322	0.164282462034586
KLHL36	146.391390667913	1.26150799309625	0.438087519737065	2.87957984708944	0.00398205449618154	0.164282462034586
EGLN1	1355.76180023283	-1.42493528238583	0.493303423722002	-2.88855745543911	0.00387013318735553	0.164282462034586
UBASH3B	463.534427199199	0.839572906075241	0.290729156979575	2.88781804617631	0.00387924203442371	0.164282462034586
CRELD1	43.6148756243651	1.22913718122759	0.42680469890574	2.87985859663424	0.00397853565768569	0.164282462034586
CAMLG	262.313863055348	0.530423580636085	0.184308701615357	2.87790850886169	0.00400321222765285	0.164282462034586
GNB2L1	9841.7654696459	1.09426786490054	0.380067071327176	2.87914409706532	0.00398756091660787	0.164282462034586
ZNF853	7.18412468241598	3.76588427625243	1.30686227144474	2.88162292120442	0.00395632884431689	0.164282462034586
CLK1	3273.15561623758	-1.59678867342264	0.564363182976009	-2.82936364665467	0.00466406698196302	0.165023540856626
SH2D2A	42.3441056153209	1.92569190909972	0.676236944425774	2.84765853887933	0.00440421513820111	0.165023540856626
NEDD4L	165.357590580489	-1.19967406000257	0.422785835415937	-2.83754553608054	0.00454618615476297	0.165023540856626
FECH	617.937053844036	-1.82902273612753	0.638509535070846	-2.86451906458154	0.00417643013601639	0.165023540856626
PDZD4	17.4230953729923	2.53217505890542	0.88979381294252	2.84579980448683	0.00443000360277732	0.165023540856626
MCAM	29.3577278426638	-2.32471091340223	0.815046218214988	-2.8522442794637	0.00434117256485678	0.165023540856626
IL12RB2	20.2673513670265	2.31044110783734	0.814217282251643	2.83762228854689	0.00454509323484313	0.165023540856626
HBQ1	56.861735752556	-1.77204438102994	0.616303350732888	-2.8752794852124	0.00403670005636413	0.165023540856626
GPATCH2L	252.117430655841	-1.05641958254607	0.368362967744964	-2.86787672771026	0.00413236506799292	0.165023540856626
NFKBIA	1994.16207910499	-1.41990217279927	0.501260250342906	-2.83266461250006	0.00461617913687474	0.165023540856626
CYB5B	626.981766493334	0.970350547363917	0.342083044834296	2.83659351732545	0.00455976226841183	0.165023540856626
DNAJA3	131.089990360244	0.932509755981257	0.329364056355811	2.83124323369964	0.00463674454388148	0.165023540856626
LSR	10.315273906678	2.33441680864691	0.818499804604907	2.85206764316057	0.00434358564663521	0.165023540856626
PDHX	792.969748391131	-1.1032036547287	0.389358729355883	-2.83338621058716	0.00460577024294333	0.165023540856626
SLC4A3	5.24834845827396	-3.55531619671502	1.24201448102546	-2.86254005169055	0.00420260141314457	0.165023540856626
ACVR1	188.053274993481	1.0687274478005	0.377249320089322	2.8329473133244	0.00461209870416284	0.165023540856626
CSTA	219.573523257198	-0.919527921838147	0.324587796638631	-2.83290971305946	0.00461264122855283	0.165023540856626
GIPC1	49.8030745287268	1.74170041346423	0.609666542560338	2.85680825808454	0.00427924256153645	0.165023540856626
BHLHE23	73.1930888256932	-2.29479153724038	0.807940134599563	-2.84029897633164	0.00450712699170188	0.165023540856626
PLAGL2	172.03024272918	1.32092035735721	0.462292734535712	2.85732450172255	0.00427228816956701	0.165023540856626
APOL3	778.654306291392	1.62263312342715	0.572711898201144	2.83324500245892	0.00460780546489273	0.165023540856626
NUP210	728.570913878702	1.66888707825156	0.588436241181395	2.83613917949881	0.00456625421686536	0.165023540856626
C14orf159	274.961850213373	-1.36211590466073	0.479015911359722	-2.84357131435209	0.00446110247993995	0.165023540856626
AVIL	80.0425672424553	-1.78913795313647	0.625968276875384	-2.85819268999897	0.00426061578946731	0.165023540856626
MARCH7	773.080175046706	-1.03155416773895	0.359990116955288	-2.86550691019962	0.00416342186145078	0.165023540856626
STRA6	51.5895637658051	-3.49778088669827	1.2220009056035	-2.86233902991327	0.00420526811338726	0.165023540856626
WTIP	34.8688293888333	-2.47381029976436	0.866675930104243	-2.85436599060368	0.00431228205756796	0.165023540856626
PYCR2	481.739634034868	1.11647002673513	0.38948354478854	2.86653965661447	0.00414986163215283	0.165023540856626
DOCK5	446.224337664442	-1.26021755154118	0.44454451743333	-2.83485118389787	0.00458470367798591	0.165023540856626
ASAP1	3358.85164554553	-1.06684907013427	0.374058589406068	-2.85209082306656	0.00434326890964917	0.165023540856626
AK5	27.8681689326442	2.84463336559284	1.00111840538233	2.84145546650545	0.00449081236036943	0.165023540856626
FOS	401.209984830156	-1.42009595137814	0.499136525172876	-2.84510525629493	0.004439674975819	0.165023540856626
PRKCDBP	39.0134457752414	2.4064464642909	0.83798158185138	2.87171760860694	0.00408247598399405	0.165023540856626
CLSTN1	509.922152768516	1.83844730617165	0.646789123895287	2.84242149141223	0.00447722566026541	0.165023540856626
BPGM	879.311261282757	-1.77966114981211	0.621528457651113	-2.86336229323727	0.00419170974238664	0.165023540856626
RASGRP1	437.023642895645	2.15733590722669	0.762781180982289	2.82825004210058	0.00468032347347818	0.165023540856626
CNP	305.370286039284	1.23289127524875	0.435947475363488	2.82807297879355	0.00468291297974591	0.165023540856626
TLR6	134.615608081018	-1.23952427240193	0.431913591390678	-2.86984317490659	0.00410675424994757	0.165023540856626
ZNF683	37.7220327518152	2.60503507463572	0.916294436383464	2.84301090478904	0.00446895413583956	0.165023540856626
ALOX15B	54.589398852241	-2.69737083462088	0.938990829684166	-2.87262745209998	0.00407073842378212	0.165023540856626
CSNK1A1L	66.1452986561384	-1.98533059034858	0.694605846026553	-2.85821174944832	0.00426035986893656	0.165023540856626
MAB21L2	38.1195579544014	-2.39579679970409	0.840539256803472	-2.8503092274538	0.00436767428603296	0.165023540856626
SRPR	719.520402078841	1.06507908009751	0.373753671728079	2.84968191796761	0.00437629709932269	0.165023540856626
SETD4	88.3865584054527	-1.65123421592578	0.583567016515274	-2.82955370881994	0.00466129755158959	0.165023540856626
LRCH3	570.068919333512	-0.883752219870004	0.309463320538846	-2.8557575687199	0.00429342826560009	0.165023540856626
NF2	317.616557465876	1.35139768837259	0.476221449060033	2.83775056969816	0.00454326710138604	0.165023540856626
COL4A1	7.93280149622466	-2.94870741589359	1.0397111327885	-2.83608333401717	0.00456705276002526	0.165023540856626
SOWAHC	128.245457681732	-1.81948477601285	0.633911045498386	-2.87025252033959	0.00410144112187271	0.165023540856626
MYL4	34.5848088021668	-2.10863127148526	0.737933775547391	-2.85748036118974	0.00427019057954573	0.165023540856626
UNC13B	30.5889168157237	-2.67178144650035	0.929490032055775	-2.87445949322459	0.00404719681103177	0.165023540856626
CDC42BPB	86.1440580768623	1.61698636660841	0.570603472519028	2.83381795675014	0.00459955256729138	0.165023540856626
AGAP6	180.889127060332	-1.4100635220344	0.497989973833285	-2.83150986189624	0.00463288048847159	0.165023540856626
CEMP1	61.9755966015313	-1.89855733055832	0.668237832060984	-2.84114014422496	0.00449525530470694	0.165023540856626
POU5F1B	38.9027061385639	-1.31328749927501	0.462382572924674	-2.84026167112694	0.00450765414986385	0.165023540856626
RHOQP3	33.338701294996	-2.90971231958951	1.01543722385948	-2.86547730496845	0.00416381117789405	0.165023540856626
EIF3IP1	40.1705524450616	-2.80275238711598	0.988286240778279	-2.83597228360561	0.00456864106285136	0.165023540856626
OR5H3P	31.4090606343486	-2.8168451342081	0.995281800183638	-2.83019857661254	0.00465191215806586	0.165023540856626
TRIM16L	56.411865826711	-1.89984817787855	0.672178031025832	-2.8264062349362	0.00470735233554797	0.165219183107344
LMBRD1	185.427513552736	-0.806223061386253	0.285275982998543	-2.82611614518692	0.00471161767970073	0.165219183107344
ACOT7	74.7429956213587	1.71520206572103	0.60747550715243	2.82349172193151	0.00475036526571656	0.166169639883105
YWHAQ	1410.46749353296	0.871082004701748	0.308734935257544	2.82145590026959	0.00478062099077385	0.166412250683718
ZNF402P	28.7425263127563	-8.54332112994241	3.02749484476966	-2.82191104130267	0.00477384173562054	0.166412250683718
KDM4C	190.278550229585	0.660647239246876	0.234362648090856	2.81891011485226	0.00481870097974496	0.166565846327598
SUPT5H	883.965318757799	0.973410280748404	0.345376810169675	2.81840080771547	0.00482635208920243	0.166565846327598
TMX2	334.055594610077	0.955291701256653	0.338991035330699	2.81804414185976	0.00483171667458139	0.166565846327598
SNHG4	1445.10205391439	-1.80707541078027	0.640912952760528	-2.81953329698966	0.00480935410460657	0.166565846327598
SNAP47	82.8060827352548	1.0286756965852	0.3655681898823	2.81390921052623	0.00489430490605655	0.168316914745154
SARAF	3402.35467047324	0.503603597810221	0.179025796083348	2.81302252986917	0.00490782123713891	0.16837602090492
ZNF846	18.401889818002	-1.28454778994336	0.456927213410748	-2.81127442674034	0.00493456781534418	0.168887654341948
CAPN7	139.000297602104	-0.791097416809594	0.281809704903675	-2.8072043050469	0.00499735359913267	0.169010025039861
BACH1	661.424321278222	-1.17649617552311	0.418724910409205	-2.80971145082665	0.00495859344084896	0.169010025039861
CCAR2	342.065555681657	1.35042724168055	0.480956208487513	2.80779667223198	0.00498817103999645	0.169010025039861
MRPL10	225.582761679953	0.97528780572652	0.347263092579647	2.80849830162366	0.00497731449670038	0.169010025039861
MED27	71.3304038625154	1.1807231999832	0.420553330233938	2.80754690332951	0.00499204096191795	0.169010025039861
CLCN7	162.447973384629	0.867373294093522	0.309373545254249	2.80364403291399	0.00505286576240167	0.170081368304237
MKI67	293.885887045915	1.91602600791842	0.68335928396629	2.80383401948914	0.00504988944785241	0.170081368304237
NR3C2	90.2944865753552	1.96930206891623	0.703097789420028	2.80089355783735	0.00509613251655059	0.170142033638474
FOXK1	341.639977590594	1.62547082241875	0.580779225187275	2.79877576870042	0.00512967459816684	0.170142033638474
NUDT21	699.31516981512	0.892136738092288	0.318756884289772	2.79879990695753	0.00512929116886279	0.170142033638474
FHL3	217.951043499452	-0.954484020990343	0.340814869329792	-2.8005938322683	0.00510086757152327	0.170142033638474
AC138969.4	140.395964509401	1.28778580721621	0.460056349464491	2.79919146581762	0.00512307498548242	0.170142033638474
ATG7	221.851110446247	-0.841756229191103	0.300815808843678	-2.79824465484967	0.00513811774791076	0.170142033638474
TYRO3P	65.864208163208	-2.30823911299591	0.823957676932498	-2.80140494787211	0.00508806276471727	0.170142033638474
USP5	79.4639601306092	1.69569109037784	0.606212936512244	2.79718723941087	0.00515496495091868	0.170304768008128
GPA33	50.411653191976	3.09890586335702	1.10848581762348	2.79562066928458	0.00518001599940512	0.170343751943571
REL	1332.49786376721	-0.718880268535649	0.257107140328427	-2.79603385428097	0.00517339809289492	0.170343751943571
ABCB7	164.770054323757	0.795476145883562	0.28466923012618	2.79438752664265	0.00519981252225246	0.170358738114055
LRR1	146.937525343141	-1.42510109181432	0.510086418256512	-2.79384245651031	0.00520858468960247	0.170358738114055
HLA-DQA1	794.520200742715	4.41912083812401	1.58200629300531	2.79336489220221	0.00521628142908085	0.170358738114055
LACE1	14.0549052178677	1.63665968030919	0.586498035289105	2.79056293769581	0.00526164693839708	0.170972152486263
FNTA	3551.58496890685	-1.69751914532683	0.608158820574613	-2.79124315540296	0.00525060112171896	0.170972152486263
POLE	65.2642028947608	1.38972736794204	0.498112342429703	2.78998781913974	0.0052710024589375	0.170972152486263
PPM1A	1191.08577614411	-0.946728744499357	0.33988504555014	-2.78543806764718	0.00534554504997008	0.171817754678059
HDAC11	13.1142102101393	1.23793721214438	0.444675093353979	2.78391398719273	0.00537072745502933	0.171817754678059
TRABD	734.294312722509	-0.775690666294743	0.278688740024262	-2.78335847450174	0.00537993280520792	0.171817754678059
MCC	81.1379430454909	2.44434451463947	0.878226517219331	2.78327341148708	0.00538134363376488	0.171817754678059
RCE1	75.797062942614	1.59351005111789	0.572115861170174	2.78529255920053	0.00534794467581254	0.171817754678059
HOXB4	18.9875711865685	1.67850335531244	0.602849511335124	2.78428251786267	0.00536462841685137	0.171817754678059
VPS13A	125.26103747251	0.779559283733912	0.279698401497666	2.78714243470719	0.00531751010184915	0.171817754678059
CDHR1	6.44524765479031	3.66025927599155	1.31589813773514	2.78156733490892	0.0054097107192995	0.172159802464947
ACOX2	17.8595249110087	-3.40314894947641	1.22363524023202	-2.78117925798795	0.00541618212631455	0.172159802464947
POLD1	52.8072659321823	1.32138371790567	0.476533400992262	2.77290891919479	0.00555576682759373	0.172213353799131
SIRPG	163.07744306376	2.14282208384628	0.772206253970011	2.77493489962009	0.00552127586156265	0.172213353799131
SRRD	401.399026807685	-0.86439245433807	0.311113819884588	-2.77838012679323	0.00546306664996353	0.172213353799131
TRIM23	327.732357575493	-0.631293574567896	0.227697868707928	-2.77250541759645	0.00556265934659539	0.172213353799131
OGFRL1	686.010012534473	-1.0199177259218	0.367851396035763	-2.77263519158329	0.00556044173672768	0.172213353799131
PPP1R12C	511.765789918875	-1.39973260878803	0.503856039084889	-2.77804075015206	0.00546877592804961	0.172213353799131
TMEM204	61.8846107296793	2.02813792304155	0.731034052436084	2.77434124482029	0.00553136236800834	0.172213353799131
ZNF132	18.2654129951059	1.7087059114764	0.615769825272053	2.77491010658322	0.005521696775892	0.172213353799131
PAQR6	16.0674391587459	-2.36725678811738	0.853833164687779	-2.77250508181304	0.00556266508558012	0.172213353799131
LTBP3	131.262591337213	1.41939571189894	0.511630356858151	2.7742601526134	0.00553274145727509	0.172213353799131
ANXA6	2157.48116654269	1.15098084041162	0.415050154005686	2.77311266916396	0.00555228934782368	0.172213353799131
LIN37	335.790258260925	-1.67279300205128	0.602360072199837	-2.77706488071527	0.00548522284263183	0.172213353799131
OR6A2	80.0277930855237	-2.68398799941193	0.968479223800198	-2.77134287804365	0.00558256073391562	0.172455209511783
BCR	691.748937277621	1.05224581408534	0.379853166835748	2.77013832173824	0.00560324914891891	0.172720457566675
CABLES1	11.4105359170978	2.7933187788569	1.00873081584633	2.76914191078151	0.00562041488856181	0.172876209675763
NMI	491.899259314939	-0.931847939299109	0.336867009677318	-2.76621904944541	0.00567104273365276	0.174058326655252
TGFB2	41.5731573954216	-2.50501870124342	0.905956648936116	-2.76505360845368	0.00569134417122035	0.174306575132311
CCNL1	340.972376216023	-1.43880856913133	0.520756602410373	-2.76291949534901	0.00572868941305614	0.174409307149488
C6orf163	8.71449398393264	-1.78865397996182	0.647298919708078	-2.76325809529927	0.00572274947825879	0.174409307149488
OR10C1	29.0926438418185	-4.38139671946876	1.58587246436151	-2.76276738384051	0.00573135965899033	0.174409307149488
PTPN23	213.145577794037	0.775488561463513	0.281294891650133	2.75685262862165	0.00583606478223855	0.174617015874441
NID1	99.7243443745123	1.91168815596534	0.692518367193661	2.76048729756036	0.00577152023675021	0.174617015874441
SLC25A37	6064.94994928371	-1.46576974507759	0.531284412467336	-2.75891727798001	0.0057993213019951	0.174617015874441
KCTD15	58.3854465256922	1.48679668389726	0.539170701029467	2.75756208758829	0.00582341531322904	0.174617015874441
MRPL16	298.007238992543	0.908709674661447	0.329561608450722	2.75732867955499	0.00582757418687128	0.174617015874441
TCP11L1	98.269692534987	0.672789436624585	0.243793076585936	2.75967408938059	0.00578590505342789	0.174617015874441
CD3E	1056.88238682284	2.2514582240929	0.816520552002586	2.75738096067638	0.00582664240712459	0.174617015874441
TPBGL	51.1709654475744	-2.3489459846138	0.850793889194926	-2.76088723067407	0.0057644576673448	0.174617015874441
B4GALNT1	42.2080465981326	-2.94599726159391	1.06895054017009	-2.755971535526	0.00585180892437836	0.174721792821607
RAI2	5.52695476766564	3.91741869276734	1.42293131546074	2.75306239324622	0.0059040642956076	0.175182548080898
KCTD18	162.126970265892	0.845558515065202	0.30700456569601	2.75422130334849	0.00588319722021409	0.175182548080898
SMG1P6	159.409392228236	-1.30226335593329	0.472990104022805	-2.75325708689773	0.00590055403007163	0.175182548080898
AGFG2	110.135938853593	1.59377206888254	0.579229605979357	2.75153765006158	0.00593162009040702	0.175635024751637
VSIG4	200.012903745741	-2.67669931516682	0.973688856004176	-2.74902942419558	0.00597720202909351	0.176618276106051
SPAG9	1242.57318467743	-0.818353700805216	0.297945813231677	-2.74665279544935	0.00602068342107048	0.176804925484605
RBM38	383.838829803608	-1.36252414945207	0.495870332528421	-2.74774282725209	0.00600070558993096	0.176804925484605
EXOSC1	980.713507456752	-1.37324680651109	0.499866456746506	-2.74722736038176	0.00601014548234995	0.176804925484605
FKBP3	368.948365359818	-1.01687727832598	0.370633003432676	-2.74362312289517	0.00607652561595133	0.178078385196832
PRRC2B	964.177277775565	1.39041130712436	0.507037735713358	2.74222451149159	0.00610246153423778	0.1784719897882
DNAAF5	76.5024990943241	1.50939458410945	0.550789167108425	2.74042169716878	0.00613604008805693	0.178818774471619
ROBO1	5.37752679686645	3.59279973412219	1.31112450759202	2.74024298479527	0.00613937776703288	0.178818774471619
GINS4	46.7802520353521	2.04211003160488	0.745526711649667	2.7391507235015	0.00615981268192376	0.179048567406142
PLA2G15	44.86161855559	1.22790485955565	0.448902889864289	2.73534630157285	0.00623146798661552	0.179305465937453
EMC10	295.550892923928	0.850480527914331	0.310864426403899	2.73585671333561	0.00622181112518398	0.179305465937453
PLEKHA7	8.74641809054942	1.72790968684086	0.631128573333588	2.73780931469182	0.00618499264137629	0.179305465937453
RPL23A	88.5217335569675	1.11878430842927	0.408752015778022	2.73707349503773	0.00619884424657598	0.179305465937453
HIST2H2BF	17.2372462330317	-1.69460765987833	0.619463288591633	-2.73560627576667	0.00622654765576534	0.179305465937453
NCAPD2	814.217174114761	1.44516066409779	0.52884233572534	2.73268716680116	0.00628199675669783	0.180033449220063
CHKB	288.603647001053	-1.39177538706722	0.509269419533813	-2.73288623601483	0.00627820131933253	0.180033449220063
TTC9	60.884003451828	1.41067091097001	0.516421058494597	2.73162933185222	0.0063022000211209	0.180250498399674
PTPLAD1	77.7972207817836	1.24833540860245	0.457473502687557	2.72876002931044	0.00635729472685069	0.180380338651318
TMEM87A	250.683272060396	0.696609457293391	0.255122937927525	2.73048540030251	0.00632411341772941	0.180380338651318
TMEM69	211.005028426487	0.864220312435177	0.316687941034785	2.72893344031768	0.0063539527217862	0.180380338651318
TMEM88	22.6970673396251	-1.65442909423486	0.606125031051196	-2.72951785437008	0.00634270143900075	0.180380338651318
MAST2	58.4037028843986	1.26592334933726	0.466539701264074	2.71343113117122	0.00665904080512076	0.181016285792414
FLT3LG	117.673925228565	1.89051248888187	0.697366706279853	2.71093023492178	0.00670947415808486	0.181016285792414
SRPK1	894.611204912391	-1.25005361191039	0.45938688766459	-2.72113472429603	0.00650582409640207	0.181016285792414
DHRS2	12.234361152302	-2.6591931345812	0.976614796041586	-2.72286795711005	0.00647179188662587	0.181016285792414
VWA8	112.717571606878	0.789622532407185	0.291150159805635	2.71208002404779	0.00668624489556237	0.181016285792414
GYS1	5.29351086972807	-3.92717151999223	1.44610607612478	-2.71568703349627	0.00661384068211751	0.181016285792414
PVRL1	57.0987339330846	1.61984211783399	0.594549927106981	2.72448459579496	0.0064401934544822	0.181016285792414
ACTR1B	222.47067833128	0.960938406205196	0.354401501439427	2.71143999757979	0.00669916645395138	0.181016285792414
TMEM54	13.1125078560803	-2.88520412236259	1.06304794411229	-2.71408654552445	0.00664588013453581	0.181016285792414
ATPAF1	160.950368978355	0.69614493766322	0.256432903305773	2.71472548447938	0.0066330728044988	0.181016285792414
ASL	137.727232196966	0.980210493216558	0.36023734070943	2.72101301682438	0.00650821987324572	0.181016285792414
KIF11	22.4263145011408	2.42914518660853	0.894398236301733	2.71595480403992	0.00660849388630264	0.181016285792414
GPHA2	70.9767435680741	-2.89941974953359	1.06375271701485	-2.72565202716479	0.00641746150127236	0.181016285792414
CD96	411.218904538813	1.41748584785065	0.522030825296621	2.71532978353381	0.00662098024415091	0.181016285792414
TATDN2	331.025022323322	0.847989836072986	0.312352154123756	2.71485189033467	0.0066305416699333	0.181016285792414
FDPS	320.421903045717	0.893741634237797	0.32802987036297	2.72457393361421	0.00643845133285163	0.181016285792414
PLB1	82.8042236675962	-2.03818025220579	0.751269553938815	-2.71298130147809	0.0066680869054884	0.181016285792414
CLEC7A	445.694784312148	-1.06930412978983	0.394383867495019	-2.71132827156865	0.00670142440149264	0.181016285792414
ACBD7	27.1882161521637	-1.72520497110603	0.635893683042262	-2.7130399579569	0.00666690669436064	0.181016285792414
CCDC66	1391.3574616984	-1.53242647114675	0.56441306822443	-2.71507971274932	0.00662598197622649	0.181016285792414
FAM228A	8.23426245067318	-2.38895855759068	0.87822089230573	-2.72022514895834	0.00652374803261155	0.181016285792414
C9orf114	69.3588021156753	1.45162581337614	0.534865508172012	2.71400154094307	0.0066475856992534	0.181016285792414
FOXB2	48.3161297068942	-2.35396522574251	0.866479281351932	-2.71670111034821	0.00659361227772778	0.181016285792414
PLEKHM1P	413.926148413508	-1.28782520005444	0.473734102843025	-2.71845575888627	0.0065587426200007	0.181016285792414
RP11-632K20.7	2866.32467508857	-1.31037396453422	0.481848136082632	-2.71947500967298	0.00653856355547842	0.181016285792414
RP11-10O17.1	74.2110059378773	-2.12971556645218	0.782700406950756	-2.72098436073277	0.00650878407563686	0.181016285792414
MRI1	264.924870451585	-1.50877551209865	0.558201500588516	-2.70292270892848	0.00687327269145551	0.181824964322295
HAL	411.471984346207	-1.34529371873795	0.498035225575062	-2.70120194246218	0.00690893748793573	0.181824964322295
CDIP1	248.669497692692	1.2600740509683	0.46656013920508	2.70077519505888	0.00691780798956042	0.181824964322295
EFNB1	74.3130484500581	1.61587147401761	0.597684392116329	2.70355307137267	0.00686024918167807	0.181824964322295
LIN7A	61.237669532656	-1.89681188812463	0.701610879011731	-2.70350980132524	0.00686114244683355	0.181824964322295
CRIPT	102.082034268337	-1.11492277295324	0.41265213057148	-2.70184664116285	0.00689555596214057	0.181824964322295
GCNT7	5.52337065215189	-2.82302264239031	1.0437272246041	-2.70475137166334	0.0068355529958025	0.181824964322295
DDX56	217.912235479011	-1.9114080172912	0.706845244676685	-2.70413931717896	0.00684815704012898	0.181824964322295
FAM188A	2036.01961799172	-1.24591075876895	0.460573703614006	-2.70512786334218	0.00682781025709544	0.181824964322295
RNF166	326.586302563335	-0.689729950277732	0.254787335562664	-2.7070809809073	0.00678776976650436	0.181824964322295
ZCCHC4	83.0916615431077	-1.21149016678569	0.447397043856936	-2.70786359324513	0.00677178488785254	0.181824964322295
HILS1	40.1564677004253	-2.94761646892172	1.08903112248074	-2.70664116761626	0.0067967678405452	0.181824964322295
SDHAF1	110.309130712622	-1.83614866856722	0.679636089046978	-2.70166446155318	0.00689933496504582	0.181824964322295
RP11-274B21.1	434.894518253057	-1.36831493058724	0.505159224209278	-2.70868048134536	0.00675513601977568	0.181824964322295
DBNDD1	7.89343260915569	3.76336504382488	1.39447745338338	2.69876363701252	0.00695975877290242	0.18203103525423
PDCD2L	19.6107873174403	2.1149479874546	0.784260755299726	2.69674081376967	0.00700217477260176	0.18203103525423
LRWD1	165.346560043598	-1.04681513662442	0.387920147028737	-2.69853253212671	0.00696459304020821	0.18203103525423
D4S234E	74.9888179450512	2.63922154743521	0.978063652525382	2.6984149146333	0.00696705452861655	0.18203103525423
SYNDIG1L	8.23422593101325	-3.07695944392156	1.14076987980224	-2.69726567855645	0.00699114678747036	0.18203103525423
KLHL2P1	3450.73480626685	-1.70028085126236	0.630266865639915	-2.69771575178087	0.00698170268082474	0.18203103525423
KRT33A	14.8201071366938	-3.03894693173732	1.12766073373724	-2.69491243316223	0.00704071316187839	0.182038148996972
IDH3G	873.882931638567	0.919746275041908	0.3412401805822	2.69530473660137	0.00703242822389742	0.182038148996972
ESYT1	1051.19465706215	1.66475658833056	0.617718678782233	2.69500768798582	0.00703870069868775	0.182038148996972
MKNK1	66.8188631599604	-1.88006440692877	0.697859816186445	-2.69404307759494	0.00705910405985973	0.182183604235657
ARF3	1697.2368680575	0.534461092691674	0.198514967639702	2.69229619834865	0.00709618912308741	0.182480740837304
SRGAP2	36.5695234919049	-1.33594251254182	0.496147531068741	-2.69263158412598	0.00708905557158578	0.182480740837304
CCR7	406.804395022772	2.199921923474	0.818747368813657	2.6869361750275	0.00721107302836418	0.183451754475603
DCTN5	449.250024976082	0.933838945905353	0.347492382211129	2.68736523075194	0.00720181578742663	0.183451754475603
LRRC8C	432.929221754591	1.27223076147455	0.473303927689465	2.68797845748971	0.00718860341727119	0.183451754475603
TMEM150B	90.6849104072103	1.28470409424177	0.477996757717975	2.6876836997287	0.00719495144763734	0.183451754475603
C7orf65	11.9132829957946	-2.98020010875389	1.10903617600213	-2.68719828373585	0.00720541654235692	0.183451754475603
RP11-864I4.1	161.19702471345	1.1993623007477	0.446337440964969	2.68712008151212	0.00720710378309663	0.183451754475603
ZFYVE16	461.078499075279	-0.937938751071815	0.350010734099853	-2.67974281841378	0.0073678743872814	0.183997133458646
OVGP1	97.626283550706	-2.55159022402613	0.951748040346551	-2.68095138194038	0.0073413181007564	0.183997133458646
PTPN4	1469.05895160601	-1.42918796406508	0.533161871976267	-2.68058921536816	0.0073492671174473	0.183997133458646
TULP4	60.6381772797375	1.40077909422325	0.522261602872104	2.68214068681263	0.00731526885746594	0.183997133458646
DDB2	68.7572836071328	1.20478449881729	0.44952881103685	2.68010518844927	0.00735990284299586	0.183997133458646
ITGAX	1612.84063603883	-1.48080477504538	0.552067626969545	-2.6822887318605	0.0073120320503545	0.183997133458646
PURB	262.897778488384	-0.9805355693561	0.365799865961422	-2.68052468192951	0.00735068434054076	0.183997133458646
LRRN3	19.4877412028856	2.98583207194974	1.11391695815778	2.68047994967935	0.00735166685230363	0.183997133458646
OGFOD3	69.3632426076485	1.33601455292475	0.498129732505798	2.68206145054632	0.00731700178064173	0.183997133458646
SHISA4	29.087629883672	2.2672662256636	0.846168557430107	2.67944986345215	0.00737432457527644	0.183997133458646
PSMC1P9	44.4633883078348	-2.74854142512941	1.02451559627458	-2.68277167778007	0.00730148201472314	0.183997133458646
LAP3	840.925566410693	1.35231877697044	0.505049278956035	2.67759767871714	0.00741522276876006	0.184377681056435
STMN3	59.5602249827526	2.00163284157292	0.747550431579855	2.67758903883277	0.00741541402230896	0.184377681056435
MICALL1	112.565961422672	1.18692883935619	0.443769302153728	2.67465287390478	0.00748066615539607	0.184393898738882
FXR1	932.281989410395	-0.997311700771843	0.372627550075193	-2.67643039429208	0.00744110203838106	0.184393898738882
ECHDC3	21.4973170715131	-2.11242628811651	0.789477693790857	-2.67572637546377	0.00745674961590426	0.184393898738882
LZIC	678.61369994126	-1.17343844901844	0.438681449317753	-2.67492151957507	0.00747467455417298	0.184393898738882
GUSBP8	8.7005676098412	-3.01452604212777	1.12687547844357	-2.67511903470594	0.00747027212220068	0.184393898738882
NDC1	298.238176349169	-0.942368040088885	0.352941032008504	-2.67004387312546	0.00758413365297706	0.184514325063583
HES2	53.8219043929176	-2.4319699456148	0.911293620388118	-2.66870072521635	0.00761452646688443	0.184514325063583
NFKBIB	258.265774420041	0.854618680260316	0.319942486050523	2.67116346694062	0.00755888259083416	0.184514325063583
TFDP2	205.900346172438	-0.994345645233635	0.3721377194732	-2.6719829600752	0.0075404477366467	0.184514325063583
CD7	446.910765402773	1.9860027956389	0.743794692164872	2.67009541283292	0.00758296957978393	0.184514325063583
EP400	157.644401108216	1.23732804412127	0.463238153566958	2.67104087734091	0.00756164376892456	0.184514325063583
RINL	41.5514688749249	-1.48628932945379	0.556734686248679	-2.66965462394399	0.00759293039025596	0.184514325063583
ZNF140	132.446734847751	0.771917658566626	0.289249970629531	2.66868707674059	0.00761483586480175	0.184514325063583
ZSCAN25	66.6988928153518	1.03796096380464	0.388345095450957	2.67277989593079	0.00752255899145708	0.184514325063583
SEC14L6	10.8029434666377	-3.27557870456104	1.22707905679076	-2.66941130356166	0.007598433891948	0.184514325063583
ATP5EP2	21.612936682144	-2.62803711820928	0.985226300197055	-2.66744515212764	0.00764303632248244	0.184883753210965
ARHGEF15	10.8270925342088	-2.31463173735286	0.868400842571925	-2.66539554533096	0.00768978164632489	0.185699769300083
EPB42	434.203130169878	-1.5444129194175	0.579591082505608	-2.6646595609113	0.00770662964379443	0.185792260601747
PRMT7	117.343108683645	1.22659808439635	0.460421863179103	2.66407436850844	0.00772004934357164	0.185801929564004
KIF16B	103.213711373613	0.973348456600651	0.365730108529748	2.66138453985524	0.00778200253872729	0.18603809084207
SEMA5A	21.2271160242032	4.40513058574125	1.65513541304419	2.66149255887116	0.00777950604220178	0.18603809084207
EXD3	10.3823196247777	1.95317587797725	0.733764653265472	2.66185604510252	0.00777111054886607	0.18603809084207
PCNAP1	82.2809917887342	-2.84846541574584	1.06993093052035	-2.66228906417399	0.00776111964242057	0.18603809084207
SLC37A3	489.488130433546	-1.33627140960535	0.502445161017755	-2.65953682765816	0.00782481749510501	0.186748821555416
CD3EAP	40.615205550203	1.28930053463499	0.485960505305718	2.65309736194279	0.00797568616293914	0.188964421151498
PHF10	454.149764954029	1.21292128402602	0.456918508571985	2.65456807126676	0.00794100158165517	0.188964421151498
MAL	242.205843104634	2.36023319779164	0.88928584098213	2.6540771133666	0.0079525650734626	0.188964421151498
FAM120C	26.2593057333532	1.7363232253885	0.654536602688092	2.65275191373204	0.00798385271541151	0.188964421151498
FMN1	399.462274245195	-1.66368922507247	0.626981508986093	-2.65349009696134	0.00796641081603193	0.188964421151498
KHSRP	310.203896248508	1.31043099939262	0.494316880873099	2.65099382622345	0.00802553084076668	0.189322935800698
KRT10	5.98814706274741	-2.75682145464234	1.03971070914672	-2.65152742045413	0.00801286063854431	0.189322935800698
RABL6	355.039979504389	1.21627738106833	0.459163408647355	2.64889875404346	0.00807545202086983	0.190186223171377
EPN2	51.0553578041341	-2.05461884691804	0.776806907552593	-2.6449543985021	0.00817019267953741	0.190220211945119
PIEZO1	228.537918478875	1.52721684659413	0.577212577026392	2.64584818033912	0.00814863792174977	0.190220211945119
MAK	150.67342585815	-1.78311132492241	0.673997328747191	-2.64557624914747	0.00815519051683007	0.190220211945119
ZNF831	86.5716063060984	1.71775912507974	0.649209525858926	2.64592409177467	0.00814680956197801	0.190220211945119
ZDHHC17	379.127079859259	-0.90135405951378	0.340777803709516	-2.64499051787453	0.00816932062354934	0.190220211945119
CCDC183	53.2707896082047	-2.3542348959217	0.889837170774765	-2.64569178861332	0.00815240584192186	0.190220211945119
HLA-B.1	27.2424168763923	4.2306330285309	1.59899770718813	2.64580306120048	0.00814972480973857	0.190220211945119
KCNH2	5.41565686449278	3.97243265975543	1.50311925864598	2.64279273710712	0.00822253516912831	0.190605916198311
SPHK2	26.1564036322216	-1.09801744955618	0.415848596283784	-2.64042600929417	0.00828018709271441	0.190605916198311
SLC27A6	17.8540600300173	-2.81230772041056	1.0650971734835	-2.64042360680823	0.00828024579897372	0.190605916198311
PFKFB4	368.590199438151	-1.32915248021941	0.503337892750232	-2.64067637140716	0.00827407137769958	0.190605916198311
TMEM219	437.370434301867	0.876105107846136	0.33155356364016	2.64242404221897	0.00823149264584876	0.190605916198311
YOD1	660.687144383191	-1.4222944455232	0.538385596813803	-2.6417765518625	0.00824724461939575	0.190605916198311
INPP5J	32.5601932355774	-2.39766892375743	0.907254328664803	-2.64277485155244	0.00822296949895752	0.190605916198311
CA1	1746.28937518703	-1.48669098441403	0.564619423193454	-2.63308508943138	0.00846131465281295	0.191577893809858
SMPD4	14.7889186437324	-2.08281121585048	0.789581100142449	-2.63786863119535	0.00834288943578004	0.191577893809858
FEM1A	19.7026512071614	-2.39076609885129	0.907455517092227	-2.63458214074455	0.00842409182935534	0.191577893809858
MZT2B	305.268824159627	1.13342746924681	0.430112655387073	2.63518744461681	0.00840908312380369	0.191577893809858
TEF	17.3101733948516	2.33550168779666	0.886684956114334	2.63397012850133	0.00843929122475783	0.191577893809858
AR	7.19203805740247	3.65201108342035	1.38587530355063	2.63516571372897	0.00840962153403225	0.191577893809858
MYEOV	41.6022393097741	-2.31541342593493	0.879471907665439	-2.63273153554296	0.00847012689139719	0.191577893809858
DPY19L1	390.57237130429	1.28749840077985	0.489005212767107	2.63289299820415	0.00846610145891779	0.191577893809858
LHFP	8.24333471282427	3.76297095255105	1.42750587710422	2.6360458565568	0.00838783953033031	0.191577893809858
C12orf77	15.4279508286085	-2.48023153784899	0.941219295751049	-2.63512610615348	0.00841060294111774	0.191577893809858
RP11-345J4.3	40.2098136839517	-2.64783394543923	1.00427037204585	-2.63657479015856	0.00837477363319544	0.191577893809858
PXYLP1	456.859393771097	-1.16645660564342	0.443726786754441	-2.62877211938287	0.00856937638180296	0.192905583156296
CLIC2	94.1087408285234	-1.5112977776153	0.57480748574921	-2.62922424478425	0.0085579907458701	0.192905583156296
NAP1L3	47.7454160964493	-2.32029698244715	0.882354525595031	-2.62966519141772	0.00854689964805296	0.192905583156296
MPI	105.034731537661	1.56732214558621	0.596582594344948	2.6271670686389	0.00860990497942496	0.193512699002131
HERC2	136.154482280965	1.32721303751985	0.505660423919233	2.62471210863802	0.00867222585888229	0.194032467697803
BHMT2	15.6463781076875	-2.3376636285447	0.891021605108766	-2.6235768191719	0.00870118207248955	0.194032467697803
LEF1	845.168394798825	2.44629756674629	0.932587963005097	2.62312796624946	0.00871265413893371	0.194032467697803
EIF2B5	165.688973287653	0.871522055249003	0.332234865756491	2.62321070145533	0.0087105385246977	0.194032467697803
SFT2D3	57.6675364268263	-2.39908462232419	0.914774883753531	-2.62259564066756	0.00872627717236688	0.194032467697803
SMYD3	5.7301439947938	3.64157374889645	1.38692861723555	2.62563891439121	0.00864865102869956	0.194032467697803
PDCL3P5	7.58286317600303	-2.82816306748076	1.07841403720168	-2.6225206367115	0.00872819816858108	0.194032467697803
REV3L	401.84563114619	-1.62950508783907	0.62176839998741	-2.62075893189822	0.00877342764876119	0.194734618045287
CROT	33.0946694710125	1.301873853416	0.499681713170635	2.60540623981455	0.00917653854563323	0.195200382515037
SZRD1	1283.93928122141	1.33245006397843	0.511146259721172	2.60678825020705	0.00913958608616521	0.195200382515037
SNRPA	252.130798964781	1.44500817906228	0.554161538212561	2.60755768746263	0.00911907033877966	0.195200382515037
NFE2L1	376.940649771692	1.07349219754457	0.41024038569936	2.61673944098538	0.00887740774255413	0.195200382515037
NUP188	306.978463770285	1.70398930304078	0.65181979470194	2.61420306178331	0.00894358640633127	0.195200382515037
RANGAP1	101.557433903853	1.29295552616398	0.495552188944284	2.60912080505279	0.00907751898978254	0.195200382515037
FCGRT	889.597640173528	-0.693386871582612	0.265410923857224	-2.6125031385506	0.00898818670287638	0.195200382515037
TTC1	1155.17302749134	-0.991922388151404	0.380379209441633	-2.60771977944712	0.00911475367534327	0.195200382515037
MAN1C1	38.4119363054134	1.65018461674983	0.630000065176958	2.61934039052253	0.008809998936624	0.195200382515037
ACVR1C	9.01078959486624	2.06346626290515	0.790009700832237	2.61195053773566	0.00900272781682274	0.195200382515037
C14orf1	264.446499609268	1.13845651061507	0.437027291871122	2.60500095026284	0.00918740051408688	0.195200382515037
SAMSN1	1821.94843184097	-1.93655790844045	0.74128134869202	-2.61244655872899	0.00898967457745415	0.195200382515037
MITD1	2513.51476667168	-1.561191260224	0.59804335309641	-2.61049847329767	0.00904103755110149	0.195200382515037
CFAP97	227.615150103632	1.27608011134241	0.487887466581035	2.61552140350066	0.00890913372684902	0.195200382515037
TPP1	2941.23148772251	1.01219649290398	0.388068438449996	2.60829377659994	0.00909948224956668	0.195200382515037
KRT6C	72.7121409841402	-2.79288519528265	1.06645443869709	-2.61885092690388	0.0088226493236141	0.195200382515037
DAG1	68.3115997022119	1.33147829228266	0.511150614433394	2.60486489634487	0.00919104940093224	0.195200382515037
ZBTB8OS	659.583588181645	-1.20708738724444	0.4614090550196	-2.61608950694122	0.00889432386719291	0.195200382515037
TSSK6	23.807791620943	-2.10173940940917	0.806383367710212	-2.60637742985352	0.00915055678152896	0.195200382515037
ZNF792	61.9340007029265	1.33873276898865	0.512739248183938	2.61094264527298	0.00902930356301706	0.195200382515037
FAM159A	21.7945710366813	1.44758059996248	0.555116984905032	2.60770367206496	0.00911518254857999	0.195200382515037
NDUFA4L2	89.1048159299559	-2.68817813049581	1.02888593526275	-2.61270762711839	0.00898281111852304	0.195200382515037
ERCC6L	21.415062595842	1.92247957968765	0.735272599745233	2.61464874436199	0.00893192593869714	0.195200382515037
USP32P1	63.0711591838732	-3.64990720085235	1.40105193251463	-2.60511913666287	0.00918423187313216	0.195200382515037
SYS1	333.671263679162	0.43782010977914	0.167744431236724	2.61004259009517	0.00905309507934321	0.195200382515037
DAXX	441.671739876306	0.749244598708369	0.287379158687126	2.60716400636444	0.00912956203992879	0.195200382515037
DXO	7.84681888816597	-2.38755612293425	0.916336592455335	-2.60554488666306	0.00917282537088268	0.195200382515037
ZNF436-AS1	5.68125651216553	-3.51317248363559	1.34259946808856	-2.61669438066831	0.00887857961977311	0.195200382515037
C17orf61-PLSCR3	209.92704142902	1.44854571815374	0.554137498606582	2.61405467378802	0.00894747172193601	0.195200382515037
AHCY	198.171037709717	1.38494054842144	0.532206492703039	2.60226165484646	0.0092611164124604	0.19523582487243
RIOK3	793.884967605899	-1.33746058082524	0.513861175457503	-2.60276635928852	0.00924749501192392	0.19523582487243
NPL	1054.20416891684	-0.720950077656874	0.277044451836356	-2.60229025659292	0.00926034400544531	0.19523582487243
CLSTN2	11.3341147267492	-1.73296801701774	0.66551186664855	-2.60396260962978	0.00921528095523554	0.19523582487243
KLHL23	10.4209804804607	2.46108732004171	0.945474360525513	2.60301857225804	0.0092406947718522	0.19523582487243
SLX4IP	625.943647168403	-1.42940539836556	0.549632258459417	-2.60065776046713	0.00930452263894654	0.195653270002695
FDXR	37.4901401620305	1.30786537301747	0.502997933544824	2.60014064829337	0.00931855590309513	0.195653270002695
RP11-44F14.4	49.8071881631005	-1.81667050245042	0.698716147277254	-2.60001219311961	0.00932204481515083	0.195653270002695
PDHA1	495.686738576035	0.963532680664399	0.370771891564747	2.59872094564142	0.00935718058985328	0.195814782079745
MRPL20	605.642146373834	0.814746823013528	0.313484312903093	2.59900348910087	0.00934948229673326	0.195814782079745
PCK2	83.5652408521435	1.09236569275369	0.420749935366641	2.5962349627025	0.0094251588312958	0.196087269446434
ELP3	253.189859540099	0.979790426392919	0.377348937326544	2.59651036341741	0.00941760646942468	0.196087269446434
CCDC64	38.7715890828708	1.96795285375704	0.757972215499712	2.59633903923459	0.00942230408759152	0.196087269446434
SNX33	17.2903495645885	1.55730739528676	0.599818988226599	2.59629559226032	0.00942349571275385	0.196087269446434
ELAC2	244.407316284206	1.22960816845194	0.474845070235381	2.58949338537392	0.0096117269413716	0.196150255011013
RRP12	282.889002201699	1.06151806201823	0.409338700635623	2.59325116430453	0.00950733105955054	0.196150255011013
CSTF2	127.424995622214	1.09938400852356	0.424672783392615	2.58877905888112	0.00963168704995473	0.196150255011013
SNX4	309.61308151571	-1.01206635109588	0.390639574158582	-2.59079319671034	0.00957550147645535	0.196150255011013
ACVR2B	25.5741344536534	2.22510175631982	0.857813532395963	2.59392242286605	0.00948878945823462	0.196150255011013
GCA	4240.80510869474	-1.62490257069154	0.627813482325486	-2.58819317589793	0.00964808569350693	0.196150255011013
PAIP2	2554.1413561123	-1.21444354870484	0.468657082075935	-2.59132656936584	0.00956067175457303	0.196150255011013
PLD2	78.9401385311378	-1.39529490236929	0.538771136886547	-2.5897729236804	0.00960392597152542	0.196150255011013
ILKAP	294.418841508409	-1.16331124807597	0.449197290876476	-2.58975570802332	0.00960440623919136	0.196150255011013
BCL2A1	1597.49058745575	-1.84168074761574	0.710027828963298	-2.59381487948826	0.00949175786581527	0.196150255011013
NDEL1	585.222124991298	-0.81950814449073	0.316347556957248	-2.59053097287387	0.0095827997813984	0.196150255011013
SPRYD3	462.658369442513	1.04768767336204	0.403696780227432	2.5952341576066	0.00945264959229035	0.196150255011013
PAQR7	63.2555972884754	1.17083462509619	0.452071370052298	2.58993314476151	0.0095994572877743	0.196150255011013
TMEM14E	456.821403407231	-1.4631400080213	0.564723415418364	-2.59089665502422	0.00957262335242903	0.196150255011013
HLA-C.1	5398.54652671436	-4.61582964435935	1.78162100217592	-2.59080334073407	0.00957521924405987	0.196150255011013
KBTBD13	103.075091777487	-2.33041623881209	0.900284550583173	-2.58853296694087	0.00963857204141696	0.196150255011013
ZNF207	1008.79783110895	-0.640104703343201	0.247482120478131	-2.58646847742588	0.00969650392687136	0.196511249602383
SEMA3G	14.5475334415543	-1.90993764391937	0.738616504972714	-2.58583125486741	0.00971444768213845	0.196511249602383
MAF	22.2309724747987	1.64086856229433	0.634549648490083	2.58587892405077	0.00971310432673837	0.196511249602383
C6orf48	383.844628545869	1.10546494746005	0.427546490341128	2.58560173556337	0.00972091803666495	0.196511249602383
RUNX3	351.878834163988	1.53409699632233	0.595250357592269	2.57722986094054	0.00995956958544053	0.196633414516771
CD84	484.743870337138	1.07505428346971	0.416449234214459	2.58147739303102	0.00983784344888881	0.196633414516771
TRIB2	313.610315816554	1.47943290563661	0.574253291560552	2.57627239996518	0.00998719318964541	0.196633414516771
CHERP	155.96481477721	1.09158059934377	0.422511563341958	2.58355201147548	0.00977887213596887	0.196633414516771
AARS	404.48895808922	1.60142855179005	0.621387418394324	2.57718213208784	0.00996094499199983	0.196633414516771
NCALD	67.8877886938351	1.40929260815554	0.547106644549265	2.57590110117669	0.00999792384149282	0.196633414516771
DEPDC7	6.68488487797671	2.46279376859902	0.954219247929071	2.58095167745148	0.00985283721942543	0.196633414516771
WRNIP1	358.959823064194	0.811709276875618	0.314945836631125	2.57729800640711	0.00995760612471769	0.196633414516771
ILF3	377.3674163176	1.19653835820391	0.463622351159578	2.58084700880192	0.00985582487079074	0.196633414516771
TSPAN31	187.141495882092	0.546746250982315	0.212267439482538	2.57574243282514	0.0100025125377786	0.196633414516771
LMO4	88.2714889912631	-0.86683583885311	0.335652342318601	-2.58254071121694	0.00980757901562163	0.196633414516771
ABT1	271.380225323573	0.721973460255386	0.280218454547894	2.57646649796931	0.00998158778025069	0.196633414516771
CD3G	971.667096016005	1.78987317228268	0.694433762229012	2.57745701553665	0.00995302596964906	0.196633414516771
IQUB	59.8214932934684	-2.81033486328291	1.0882950247685	-2.58232813650942	0.00981362272750015	0.196633414516771
C11orf65	7.10854553164704	-2.15081386283761	0.834304581301874	-2.57797201530575	0.00993820461384364	0.196633414516771
PLK1	93.2798851376558	1.68079661127029	0.6520790375375	2.57759644845757	0.00994901123900866	0.196633414516771
THAP5	23.1137147055263	-1.07721713659176	0.417332518000921	-2.58119626467588	0.00984585889223352	0.196633414516771
DCTPP1	145.431431579499	1.07093003240348	0.414747465535324	2.58212556168656	0.00981938522065736	0.196633414516771
KCTD9P1	60.3781408958263	-2.16337626345443	0.838738125364096	-2.57932267299201	0.0098994269292494	0.196633414516771
RP11-504P24.2	807.475971762419	-1.60343836159778	0.621698271125524	-2.57912629979638	0.00990505645999072	0.196633414516771
RHBDF1	82.0354859501683	-2.77962260838964	1.08112817391337	-2.57103891606877	0.0101393932458161	0.196776424643146
OSBPL5	152.728252024656	1.39781656917786	0.543118663964722	2.5736853875982	0.0100621724111373	0.196776424643146
HSD17B1	24.7019938758287	-1.52057497862303	0.591182121680771	-2.57209229247314	0.0101085940067008	0.196776424643146
PMEPA1	19.5250308267128	3.48872038936995	1.35561745240431	2.57352867741735	0.0100667303940947	0.196776424643146
MTSS1L	29.5722939729518	2.96201234550445	1.15031242187326	2.57496336576186	0.0100250704221178	0.196776424643146
RARRES3	1015.64342996159	1.53727096873605	0.597983874955082	2.57075655903184	0.010147663154243	0.196776424643146
ZNF773	34.3456091226923	1.10694604454586	0.430580560509677	2.5708221551748	0.0101457413843381	0.196776424643146
RAB33B	310.319993247138	-0.894061636037287	0.347580246063388	-2.57224524743054	0.010104128752948	0.196776424643146
ALG12	164.341963060159	0.845889436583215	0.328790473558588	2.57273097796273	0.0100899603382908	0.196776424643146
PTP4A2P1	29.8520856034587	-2.5130619949508	0.977202074659128	-2.57169121936976	0.0101203109834728	0.196776424643146
PIEZO2	7.29134498646643	-2.39050806548258	0.930144708537098	-2.57003888055472	0.0101687101580709	0.196917003223865
HCST	428.802131329775	0.90629518288383	0.352970858483121	2.56762041710355	0.0102399216927665	0.197644196620725
AGAP5	158.543818198833	-1.34764592568874	0.524805756459578	-2.56789470980687	0.0102318229000028	0.197644196620725
SLC22A20	8.62159282555907	2.02126854416435	0.787296537040171	2.56735353080973	0.0102478072799423	0.197644196620725
MYH9	16420.7440209172	0.937742447678843	0.365703457958706	2.56421542446757	0.0103409339645857	0.197836205821135
PPP4R1L	176.220504767138	-1.12425163008807	0.43817928293611	-2.5657343326567	0.0102957650924987	0.197836205821135
NES	5.66041660438908	-3.06334503218775	1.19440117287376	-2.56475387144611	0.0103249016396879	0.197836205821135
PRSS53	5.4224445554588	-2.91076115774366	1.1350227531615	-2.56449586551107	0.0103325810356515	0.197836205821135
MED19	238.388908305003	-1.35921711989574	0.529735258546114	-2.56584227303688	0.0102925618842609	0.197836205821135
ATP2A2	407.923776269291	1.01873852423161	0.397228043436583	2.56461884064903	0.010328920118709	0.197836205821135
KRTAP2-2	29.5349891846538	-2.59484336195801	1.0124922358608	-2.56282791122041	0.0103823494898376	0.19836263978442
U2AF2	479.674824692741	0.781833010694752	0.305441192906457	2.55968424970823	0.0104767303281163	0.198570910017099
HMMR	37.3896421190866	-1.60803539700956	0.628200678584046	-2.55974794652251	0.0104748104341727	0.198570910017099
ABHD12	123.115621404913	1.22200827564861	0.477227441018434	2.56064125952348	0.01044791792835	0.198570910017099
HEMGN	955.133913806114	-1.42818293721007	0.557718865494201	-2.56075780392428	0.0104444139817692	0.198570910017099
TNXB	25.0887394540699	-3.04762976875375	1.19025209973994	-2.56049098289314	0.0104524375894807	0.198570910017099
USP17L22	71.5963426428362	-5.79550799593574	2.26235575328917	-2.56171381866438	0.0104157105195584	0.198570910017099
LIG3	107.515783322418	1.46784740851047	0.57356140286088	2.55918093719166	0.0104919117492775	0.198594913110993
GINS1	104.841689855403	-1.25635993640444	0.49121538022946	-2.55765594273039	0.0105380297241665	0.199203655924907
OSM	144.867663656868	-1.48250076035103	0.580193241945352	-2.55518446816149	0.010613153580233	0.199243413925824
FAM162A	99.4011772905754	1.00078270934619	0.391791587113192	2.55437518891148	0.0106378560406024	0.199243413925824
UBIAD1	154.963944979992	1.33077277293306	0.520596046369034	2.55624832769037	0.0105807579224633	0.199243413925824
LARS	142.973499933602	1.12649967372116	0.440938922924219	2.55477485691315	0.0106256501811804	0.199243413925824
PTGFRN	12.6461824238663	2.25519767195858	0.882836120622877	2.55449184653596	0.0106342920291941	0.199243413925824
MAP3K11	417.259545428213	-1.15834539798839	0.453395378084059	-2.55482401007987	0.0106241499040429	0.199243413925824
FAM229B	5.28982490640316	2.2688736261194	0.88741387423515	2.55672543780647	0.0105662579982225	0.199243413925824
FEM1C	157.64712125439	-0.875260731987577	0.342936273333275	-2.55225474832455	0.0107028230885696	0.200197498191436
ZNF362	70.612848912356	0.956227012996575	0.374729786734309	2.55177743229299	0.0107174958740274	0.200209556432094
ZNF569	1312.42864271338	-1.6392783567223	0.64254025487252	-2.55124615818433	0.0107338483707717	0.200252920193012
DOCK9	91.6881405833682	1.54247333210825	0.605007032255502	2.54951306327436	0.0107873469614626	0.200726226641454
KIAA1551	3367.91924426821	-1.35029372055534	0.529604183521372	-2.54962812336026	0.0107837878603259	0.200726226641454
CAMK4	248.68120481608	1.77221732196988	0.695446731202503	2.54831497864045	0.0108244688600977	0.201154712983483
USP17L10	36.867036407279	-6.53334639103502	2.5645147382452	-2.54759557182563	0.0108468137516186	0.201307835972823
DUX4L18	96.9259977012129	-2.33874407533592	0.918256594633168	-2.5469395907472	0.0108672243567488	0.201424709116259
TMEM160	151.112500229241	0.897319010619296	0.35251853479465	2.54545200337339	0.0109136366102678	0.20202259624091
APLP1	19.5007620858335	-2.20137724133369	0.865355143858858	-2.54390033612921	0.0109622357614529	0.202135696107825
FOXO3	2827.52751991236	-0.927105522348586	0.364394043765709	-2.54423895837518	0.0109516135348423	0.202135696107825
POLR3A	58.6609673515946	0.84312888371513	0.331346065484158	2.54455679889593	0.0109416515320205	0.202135696107825
NIPAL3	226.746958651213	1.39426635273935	0.549522145734986	2.53723414708705	0.0111732195733814	0.203152799904725
EEF2K	151.921082842304	1.1642827764123	0.458417599868423	2.53978637981282	0.0110920194489235	0.203152799904725
BIRC2	906.580566923037	-1.00328043163356	0.395004721998782	-2.53992009654166	0.0110877796959177	0.203152799904725
NUMA1	944.578989093545	1.19020610773524	0.46870897744817	2.53932859194457	0.0111065454248503	0.203152799904725
VTI1A	250.74754168489	-0.660202737739796	0.259925243098977	-2.53997160825352	0.0110861467995054	0.203152799904725
CAMKV	63.7868211588775	-2.65883739989957	1.04812135004858	-2.53676485053599	0.0111882077301789	0.203152799904725
FAAH2	25.6827347518877	1.91285657986514	0.753621950635374	2.53821770750231	0.0111418649575913	0.203152799904725
RCOR2	32.648374655766	-2.41361445171741	0.951385754005053	-2.5369461772544	0.0111824144932887	0.203152799904725
RARG	81.3031071301419	1.58035284630005	0.622690140997231	2.53794422338072	0.0111505754187433	0.203152799904725
NUDT16	109.960057237843	-0.942795138226403	0.371207412158054	-2.5398068770916	0.0110913694487663	0.203152799904725
NYNRIN	6.85857866243916	-2.45507576296938	0.967759829636318	-2.53686471352298	0.0111850168616469	0.203152799904725
HAUS4P1	48.4637285152673	-2.65834927628656	1.04755245720332	-2.53767652207472	0.0111591075548136	0.203152799904725
RALBP1	435.702276897747	-1.13113228693774	0.450009530204606	-2.51357407125011	0.0119514677448311	0.20326842531517
GOPC	185.321597866442	0.734112359066687	0.290624150540511	2.52598539282218	0.0115374278238746	0.20326842531517
PRSS8	7.89855144707783	-3.17161817209372	1.26607639917937	-2.50507645048076	0.0122424928236688	0.20326842531517
AP3M2	29.4207892039255	1.57885523299846	0.625036990739923	2.52601886990624	0.0115363284658334	0.20326842531517
ZFYVE26	412.239275466503	0.939934055333025	0.371814791038549	2.52796305576659	0.0114726423599961	0.20326842531517
LLGL2	15.2990060123637	-1.75034751417837	0.696457643215444	-2.51321459564615	0.0119636536436915	0.20326842531517
STRADB	3068.8755497244	-1.42544895322946	0.562265102401984	-2.53519015699173	0.0112386300643865	0.20326842531517
STARD7	590.553514770176	1.0784434112325	0.425387551957785	2.53520209105584	0.0112382471731106	0.20326842531517
BLVRB	1012.476574153	-0.991528930256732	0.391341547197089	-2.53366640306498	0.0112876132983986	0.20326842531517
AGO1	199.006601350522	0.986068557718135	0.392500649702258	2.51227242162821	0.0119956447796694	0.20326842531517
REC8	7.84903873547874	5.74438016798401	2.30107710376269	2.49638752156148	0.0125465451756767	0.20326842531517
SNPH	19.869962356388	2.10171080182025	0.841022273118212	2.49899541189065	0.0124545923509516	0.20326842531517
SLC7A6OS	194.018064871079	0.635747708329297	0.253929418935656	2.50363944041628	0.0122923231933618	0.20326842531517
LMF1	29.9733900805804	1.53077228063072	0.610356898160829	2.50799537982343	0.0121418254712957	0.20326842531517
MAZ	1264.28827946197	0.942026383264357	0.374767400595191	2.51362947195585	0.0119495906898532	0.20326842531517
KCNN4	79.9592112473969	1.2691114455603	0.501011658239942	2.53309763293472	0.0113059457510702	0.20326842531517
CCDC130	72.4011877206685	-1.26519072655622	0.50632660039877	-2.49876408934428	0.01246272447131	0.20326842531517
ILVBL	58.9696653504762	-1.64096997004089	0.655891501989388	-2.50189240913117	0.0123531459434179	0.20326842531517
ATP5SL	198.46697429951	0.718653110962982	0.287879213828429	2.49637027073197	0.0125471554266838	0.20326842531517
TMEM245	741.784232299197	-0.937408009282006	0.369861060379408	-2.53448689170036	0.011261214021182	0.20326842531517
STIM2	212.342055150712	-0.998427699787126	0.394778524169381	-2.52908311536913	0.0114360941719031	0.20326842531517
CD83	54.7674032992851	1.17820019498372	0.468357520006441	2.51560003769666	0.01188299487173	0.20326842531517
IL1R1	193.173192663343	-1.96316226962004	0.776875969466927	-2.52699574549475	0.0115042896367174	0.20326842531517
PASK	20.5615851257134	1.78330489753689	0.707842362685925	2.51935316610622	0.0117570665873544	0.20326842531517
PCYOX1	123.794724537394	1.51903414166988	0.601324010067624	2.52614915792079	0.0115320508067156	0.20326842531517
RHOU	145.251229937274	1.30509161807426	0.522798377966822	2.49635743544156	0.0125476094943011	0.20326842531517
SLC35D1	101.32973299352	0.805344164447368	0.322360401331225	2.49827262009107	0.0124800176321516	0.20326842531517
MPL	112.160131758898	1.87915615889791	0.751718338896821	2.49981417462245	0.0124258465710408	0.20326842531517
TSPAN1	26.3391208819509	-2.40549667281873	0.959397304240475	-2.50729980393585	0.0121657475218067	0.20326842531517
PLCG1	377.605507526539	1.60339418061048	0.63710945705875	2.51666987963518	0.0118469772780641	0.20326842531517
HS3ST3B1	29.6991819383112	-2.8294883489201	1.11864278957304	-2.5293939900154	0.011425968493585	0.20326842531517
SBDS	1053.87462179177	-1.21467521004664	0.483395429635477	-2.51279829220274	0.0119777797192202	0.20326842531517
FBXL16	19.2859097205192	2.03779549516044	0.805992311716774	2.5283063691016	0.0114614288460301	0.20326842531517
SMARCA4	414.661387717953	1.11548708600861	0.444214418447457	2.51114560825665	0.0120340048369447	0.20326842531517
RPAIN	195.421866678101	-1.1811302425637	0.467922738853448	-2.52419928439004	0.011596217024465	0.20326842531517
HEATR5A	118.786795306293	-0.555837173109308	0.222492349202978	-2.49823050141029	0.0124815006358895	0.20326842531517
TTLL9	9.83208657344606	-2.72753525346538	1.09107082443525	-2.4998700289481	0.0124238877351667	0.20326842531517
EMR3	217.824057377626	-1.40419266519247	0.555718952416495	-2.52680362814055	0.0115105843117754	0.20326842531517
LANCL2	121.12966322885	1.41788353297666	0.559760893178281	2.53301641871768	0.0113085655826136	0.20326842531517
SCO1	105.388793383025	0.990504401156415	0.390760576797645	2.53481149320073	0.0112507850910884	0.20326842531517
FAM104A	473.483187651789	-1.22999036165578	0.488845710740432	-2.51611159642327	0.0118657604981984	0.20326842531517
TACO1	94.5702687675715	0.854464863405958	0.342149587533151	2.49734295916159	0.0125127874166587	0.20326842531517
SAMD1	66.5521476942624	0.783440728786076	0.309450537840879	2.53171551826136	0.0113506039324178	0.20326842531517
ATP8B2	453.590380412273	1.6081996208609	0.637168117609878	2.52398005552054	0.0116034511578894	0.20326842531517
COPS7B	285.270678010403	0.83034260401906	0.331505782028265	2.50476054727837	0.0122534318432084	0.20326842531517
SURF6	112.199048709517	1.11203380023043	0.444763697122885	2.50028005303496	0.0124095163802253	0.20326842531517
LCN2	11675.7971186558	2.28134185657897	0.91028695581481	2.50617878461952	0.0122043892074825	0.20326842531517
GGTLC1	7.88772860712876	-3.850093099378	1.53501287378364	-2.50818293783291	0.0121353821687762	0.20326842531517
DAK	182.977500030343	0.843811335021269	0.337612315349907	2.4993499841578	0.0124421365211641	0.20326842531517
NUDT22	104.084657385748	-0.899653803954826	0.359293974928611	-2.50394904098678	0.0122815721925078	0.20326842531517
NDUFC2	6.75151234601113	2.73227108921483	1.08117882089083	2.52712228210649	0.0115001453665054	0.20326842531517
THYN1	93.3776396103923	0.947326410585765	0.375423052870704	2.52335705903501	0.0116240307131161	0.20326842531517
RPIA	754.034772801753	-1.06881594700862	0.427256460842809	-2.5015793673436	0.0123640725865396	0.20326842531517
ALDH16A1	180.90790826579	1.16703758878459	0.464266387934228	2.51372405824461	0.0119463865754465	0.20326842531517
JOSD2	144.855208123136	1.02162877250058	0.408184288550443	2.50286157786382	0.0123193715720295	0.20326842531517
FGF11	9.35471438158944	-1.6333762451646	0.652488091682358	-2.50330429932161	0.01230397049567	0.20326842531517
PYGO2	171.864851026577	1.2989965557254	0.51726901557873	2.51125916419344	0.0120301341364826	0.20326842531517
RFC4	71.9156283876496	1.22171707945953	0.487513621449999	2.5060162951464	0.0122099992563614	0.20326842531517
SAP30	126.488289156823	-1.28002294378895	0.50851400928624	-2.51718324453955	0.0118297285922942	0.20326842531517
CLEC4D	846.485924068977	-1.71951062718046	0.681073206593576	-2.52470749184318	0.0115794625394028	0.20326842531517
RAB8A	2170.94787332499	0.701797577300352	0.278223080911285	2.52242759659515	0.0116547940121287	0.20326842531517
AHCYL1	831.588762227402	0.960379252679539	0.383198589942952	2.50621812784466	0.0122030312019713	0.20326842531517
SLC30A1	552.294471061354	0.955194174096718	0.382600098649413	2.496586324647	0.0125395143792285	0.20326842531517
PDP2	35.6265915817914	1.19187593697346	0.476749179223042	2.5000062693676	0.0124191108705562	0.20326842531517
COMMD1	285.609612795092	0.701715385617214	0.279658132536678	2.50918998583094	0.0121008381801297	0.20326842531517
INSM1	136.357314652577	-2.31167324643533	0.918803612682677	-2.51596011870897	0.0118708614591711	0.20326842531517
CETN1	89.6411331579487	-2.18973067906289	0.868155872380608	-2.52227825523813	0.0116597436339963	0.20326842531517
RABEP2	32.4463253677526	0.946285883004781	0.376031327514059	2.5165081038877	0.0118524174446231	0.20326842531517
PLEC	88.0041865221701	1.34725701007799	0.537986405185	2.50425846655865	0.0122708355926931	0.20326842531517
CCDC172	10.1760423724213	-4.67538152886222	1.86206485761327	-2.51085858247439	0.0120437934027455	0.20326842531517
OR4F15	115.996008685355	-2.39363594034491	0.952504303558368	-2.51299225778063	0.0119711962092454	0.20326842531517
SEPT9	1275.65869200184	1.14560968943339	0.458186298490642	2.50031415868886	0.0124083216397183	0.20326842531517
ADAMTSL5	5.51676380741321	-3.16636027753188	1.26384743843581	-2.50533425256668	0.0122335721281454	0.20326842531517
PTMA	10817.0457065453	0.914239745873684	0.36154517133564	2.52870130306609	0.0114485412998808	0.20326842531517
SLC18A3	103.346200951099	-2.20899314525147	0.880743041765006	-2.50810172831415	0.0121381716402271	0.20326842531517
GPR89B	149.774202012738	-1.02769232501351	0.406148748317236	-2.53033483242647	0.0113953722411238	0.20326842531517
GIMAP5	304.577056557322	1.59721979754595	0.637815673755012	2.50420280226517	0.012272766445943	0.20326842531517
PRTN3	812.660433857952	2.58195297215934	1.02685389182679	2.51443072155669	0.0119224724207872	0.20326842531517
SYNGAP1	156.559830471743	1.1293249979303	0.446636913678996	2.52850797447064	0.0114548484205141	0.20326842531517
CCDC180	118.158827256791	-2.12523257593576	0.8495993141908	-2.50145279126071	0.0123684931221894	0.20326842531517
PPIAP22	2286.55913519851	0.923684365664586	0.369178069279917	2.50200226537355	0.0123493134675522	0.20326842531517
DCAF12	6051.46057061912	-1.4214327147703	0.563778845064906	-2.52125940377676	0.0116935612252364	0.20326842531517
NAP1L4	2218.86272006902	-0.874683243050205	0.347976345979311	-2.51362844962517	0.0119496253255086	0.20326842531517
SFT2D2	1539.96288589039	1.0707443370459	0.42575266068057	2.5149445580312	0.0119051103703515	0.20326842531517
RPL31P11	45.4867598089301	-2.09960096028547	0.838042665042935	-2.50536285068243	0.0122325829058474	0.20326842531517
FTH1P20	24.6361542760501	-1.56039504431493	0.615965472188754	-2.53325083104134	0.0113010053095381	0.20326842531517
AC019097.7	41.1619445251351	-1.86704527471049	0.742337823421871	-2.51508843521428	0.0119002529150355	0.20326842531517
ACTBP12	158.483814441977	-1.79850877633616	0.720239622956121	-2.49709779775019	0.0125214418409317	0.20326842531517
AK4P3	87.7095419332025	-4.4699888401401	1.77171449313825	-2.52297357020677	0.0116367146650493	0.20326842531517
SMG1P1	2400.72404295438	-0.934324375389725	0.371849202116225	-2.51264321685352	0.0119830455397543	0.20326842531517
DDOST	1958.59672647175	1.06513406333511	0.424137367650437	2.51129502980497	0.0120289118402359	0.20326842531517
POU5F2	88.247916128291	-2.15227912116734	0.859464404964832	-2.50420972495703	0.0122725263006537	0.20326842531517
MRPL46	179.178409342314	0.916824120215845	0.365187949057321	2.51055414775458	0.0120541833852499	0.20326842531517
TCEB1P2	13.8035114841395	-2.66835089825503	1.06458451892825	-2.50647163359217	0.0121942841841106	0.20326842531517
EEF1E1-BLOC1S5	244.141952824928	0.825996073028461	0.326550435877043	2.52945941048897	0.0114238386592634	0.20326842531517
CD58	582.205945584166	-1.17165548783447	0.46950326149557	-2.49552150948269	0.0125772129741754	0.203424744024937
NLRP6	83.2035575649674	-1.85453695682712	0.74321788143861	-2.4952803251146	0.0125857657633141	0.203424744024937
NFATC1	56.4186840002487	1.46891271273725	0.588801260918532	2.49475130274982	0.0126045437912744	0.20349779297406
SLC25A39	5798.20147713913	-1.69866694521577	0.681019500196861	-2.4943000086264	0.0126205823998826	0.203520843840722
LIG1	201.06256400096	1.33885109070873	0.537278889093436	2.4919108453485	0.0127057925912334	0.203520843840722
ASB5	10.4326258550282	-2.64383633707317	1.06057512157784	-2.49283269358599	0.0126728544622671	0.203520843840722
AHSP	737.609600694412	-1.59075698903382	0.638101059939661	-2.49295462568929	0.0126685034278627	0.203520843840722
FIBIN	58.3706991629254	-2.23377705205053	0.896274992871182	-2.49228983271609	0.0126922420091815	0.203520843840722
ACN9	253.8989165187	-1.28440882508863	0.515312468388336	-2.49248544112601	0.0126852530940483	0.203520843840722
CTD-2207O23.3	508.147110833446	0.935350215810708	0.375240092573235	2.49267131717317	0.012678615064231	0.203520843840722
SPIC	7.49164635667335	2.67475002752262	1.07394050274505	2.49059423747015	0.0127529670835614	0.204047473336982
NCAPG2	94.5829129179901	1.25486694849062	0.504022845190476	2.48970252135376	0.0127850055472315	0.204331018107601
RANBP10	432.633998943064	-1.11229262044116	0.446969998191956	-2.4885174059568	0.0128276957809722	0.204783975599592
CCDC88C	294.474079452911	1.21508989617339	0.488842332278443	2.48564785809359	0.0129315855241102	0.205608812649559
TP53BP1	130.472937479807	0.899217329886037	0.361613111797002	2.48668342090104	0.0128940082513952	0.205608812649559
TRIM14	617.978292531626	0.983445731823688	0.395736408414564	2.48510299005255	0.0129513959201201	0.205608812649559
FDX1P1	227.883833388176	-1.50559672844875	0.605832240377053	-2.48517102277639	0.0129489209099617	0.205608812649559
FSCB	43.540130770778	-2.35080016051873	0.945883017759883	-2.48529693036047	0.0129443415333871	0.205608812649559
PNCK	15.0928336686419	-2.89163551007093	1.16386106692757	-2.48451949484353	0.0129726404937969	0.205717250141633
FOXJ2	235.78815845606	0.885173915165164	0.356529923610241	2.48274788887801	0.013037332193541	0.206044727048482
SUN2	1037.76597119694	1.1085341139198	0.446512868300315	2.48264762925986	0.0130410017748518	0.206044727048482
CMTM8	7.08702874813081	2.06663237436508	0.832522730315711	2.4823735125903	0.0130510393253803	0.206044727048482
BCOR	247.929484741754	1.29843098516861	0.522996087632965	2.4826781994588	0.0130398827845997	0.206044727048482
HACE1	51.7189203277576	-1.29974758959077	0.524106859165199	-2.4799286001733	0.0131408693464037	0.206080789560161
ABL1	199.083858205662	1.32543903476216	0.53479981206133	2.47838350887483	0.0131979200305543	0.206080789560161
CDC34	359.620031214495	-1.20717209953175	0.486487398634092	-2.48140466314465	0.0130865712421285	0.206080789560161
ABHD11	65.0816826174649	-1.44154377498509	0.581737070935872	-2.47799881940824	0.0132121582432419	0.206080789560161
C11orf21	804.19583361265	0.653411558474478	0.263394201984177	2.48073630152926	0.013111132805136	0.206080789560161
HPS5	198.769015072257	0.752136948575044	0.303334483257236	2.47956295802087	0.0131543505210427	0.206080789560161
CCND2	611.048973208155	1.61379281177896	0.650845914009345	2.47953129464648	0.013155518520363	0.206080789560161
RBM39	4537.5414156572	-0.932521298719122	0.376204335746557	-2.47876276297716	0.0131838962749818	0.206080789560161
RAB5A	1077.05474280525	-0.627123778902171	0.25296591700661	-2.47908408501444	0.0131720249972087	0.206080789560161
ELMO1	223.968060527599	-0.679956649307161	0.27417198614711	-2.48003692449571	0.0131368777904763	0.206080789560161
ABCA3	24.4146211106607	1.48263696197175	0.598054157473503	2.47910150518005	0.01317138167747	0.206080789560161
ATN1	95.3166829417762	1.31538754089011	0.531103709228872	2.47670561894581	0.0132601220835372	0.206153009124448
GPR89A	521.392260647297	-1.40307248287954	0.566405912800257	-2.47715013415535	0.0132436180120318	0.206153009124448
ATP7A	368.332367385912	-1.51581056303057	0.612008045027552	-2.47678208701053	0.013257281663928	0.206153009124448
CAPNS2	70.5201189125993	-1.57618376024287	0.636539405534449	-2.47617625325093	0.0132798002228489	0.206234285941784
TMEM55A	1130.13974735081	-1.01028176369177	0.408373012245377	-2.47391902353413	0.0133639983670586	0.206776608198522
LENEP	193.574987567999	-2.29421275866568	0.92744661035713	-2.47368714602585	0.0133726744231527	0.206776608198522
RPL13	1779.76069355241	1.3264307749316	0.536135160611678	2.47406040935325	0.0133587106396488	0.206776608198522
ABCF2P1	9.00620272171054	-2.91905565685317	1.17952950283764	-2.47476273364141	0.0133324716177978	0.206776608198522
IRAK3	1153.32458088915	-1.41320400581073	0.57174032392871	-2.47175850060724	0.0134450307964769	0.206834021539382
FBXO7	5859.34640553936	-1.19782501091403	0.484539720691101	-2.47208837534633	0.0134326305179676	0.206834021539382
TAS2R40	134.924010215667	-1.99189777119333	0.805419532765251	-2.47311828203934	0.0133939804416102	0.206834021539382
CTD-2013N17.1	5.47609628889346	-3.09220381262241	1.25106510847053	-2.47165698386611	0.013448848934175	0.206834021539382
DPRXP4	56.1231360889633	-1.65387267109413	0.66910278750249	-2.47177668660956	0.0134443469054396	0.206834021539382
PSMF1	3356.97784034448	-0.915560841428711	0.370527659713129	-2.47096489945598	0.013474904405876	0.207011663811261
ASPRV1	127.31227285341	-1.40272519419938	0.567822960489434	-2.47035659317175	0.0134978426364613	0.207141086137178
ISCA2	222.382148223676	0.696107824186433	0.282090112819213	2.46767891731306	0.0135992241043775	0.208472745883647
MARCO	35.030727320404	2.01155578916835	0.815485037239176	2.46669858711138	0.0136365089938627	0.20870358037676
WDR18	107.458706784657	1.15375545415241	0.468649872845453	2.46187083578466	0.0138214431924474	0.20870358037676
GSS	112.732121412091	1.20356379855292	0.488854363686252	2.46200890890559	0.0138161234861717	0.20870358037676
MAST1	169.378687741632	-1.82878244995576	0.741929886626719	-2.46489928889448	0.0137051767069869	0.20870358037676
PMPCB	387.594878165758	0.680409355693754	0.276180693696411	2.46363837597456	0.0137534795210603	0.20870358037676
UCHL3	508.219635125524	-1.30126872955635	0.528274412760761	-2.46324390908111	0.0137686215275057	0.20870358037676
AOC2	54.4485615349605	-1.80970572538519	0.734322782746934	-2.46445537017862	0.0137221651449514	0.20870358037676
GLUL	1265.94634258132	-0.791480369278939	0.321446903586667	-2.4622429410509	0.0138071107824858	0.20870358037676
PLK4	35.8309802947364	1.55879057853294	0.632945058447205	2.46275811419889	0.0137872894782072	0.20870358037676
PLEKHS1	10.38931932622	-2.4093698092339	0.978556206244043	-2.46216803272006	0.013809994977479	0.20870358037676
PPEF2	26.9600421757025	-3.7633207613302	1.52803139813541	-2.46285564938156	0.0137835396390723	0.20870358037676
HMGB2	8936.21160913943	-1.03474366907587	0.420361847966869	-2.46155466791416	0.0138336313786726	0.20870358037676
TMEM41B	219.79813181139	-0.853275890792982	0.345954186818202	-2.46644186804242	0.0136462876952002	0.20870358037676
OR10A3	57.82662961867	-2.6111715629979	1.05924997881268	-2.46511363250135	0.013696980589226	0.20870358037676
C9orf172	89.7621205929742	-1.74492294583152	0.708150897771224	-2.46405526184228	0.0137374929254562	0.20870358037676
OAF	73.1301111473602	1.32129764930432	0.536933822684394	2.46082029755271	0.0138619777869336	0.208910398072984
PSKH1	63.2680841260791	0.833794348754398	0.339028074211178	2.45936667839205	0.0139182381809138	0.209537020377639
BTBD2	458.015605544694	1.05841959696172	0.430635532006988	2.45780832814451	0.013978775856563	0.209564169143768
EDAR	22.3669705285903	2.75230994543201	1.11970878288318	2.45805872697093	0.0139690328962992	0.209564169143768
ZNF653	100.533138191127	-1.54041281847273	0.626465245918498	-2.45889589008922	0.0139365025823232	0.209564169143768
CITED4	32.945153524478	-1.44053733178959	0.586080253496896	-2.4579182171631	0.0139744993619816	0.209564169143768
CD6	216.851687891896	1.67193189309628	0.680674529104609	2.45628684724786	0.0140381053844455	0.209792502666813
SLC25A23	63.8941121956494	1.85156547379512	0.753706776240471	2.45661248135624	0.014025388754555	0.209792502666813
TTC4	191.980901498998	0.980330686301185	0.399063694745943	2.45657698058776	0.014026774632945	0.209792502666813
OR1L6	67.7072278170829	-2.50917262280847	1.02174716758536	-2.45576665383694	0.0140584410382574	0.209876642780345
USP15	1290.42308770473	-1.18689110593065	0.483438566205923	-2.45510223821301	0.014084452505116	0.210045251988522
SCIN	7.44317493889709	2.3402359641697	0.956615900111687	2.44636950305392	0.014430302557315	0.210366984778344
SRBD1	1087.18233102532	-1.28406517662555	0.5234576071495	-2.45304521146986	0.0141652533563049	0.210366984778344
TBX21	140.525449599305	1.43830376805362	0.587865022784059	2.44665648117996	0.0144188191660784	0.210366984778344
URGCP	129.015840820559	1.56080790976341	0.6366146231412	2.45173116203651	0.0142170836043373	0.210366984778344
RPA1	416.185804888377	1.13581685267413	0.463336587030626	2.45138606461711	0.0142307230444918	0.210366984778344
DPM2	517.608985538804	-0.92427562899796	0.376915977148607	-2.45220602212239	0.0141983343513532	0.210366984778344
NABP2	186.195110446645	0.956745617335472	0.391013691405371	2.44683405815475	0.014411717484328	0.210366984778344
RTN1	160.052359297856	1.58776602745608	0.647309477656993	2.45287004479399	0.0141721528362965	0.210366984778344
SH2D6	9.28541968397845	-2.64408893395444	1.07986813386831	-2.44852945561304	0.0143440700969197	0.210366984778344
ABCA5	70.5689222602604	-1.08292207793052	0.442522792723238	-2.44715548156588	0.0143988709219189	0.210366984778344
SLAMF6	317.965325229111	1.33255213506984	0.544580317742324	2.44693407318543	0.0144077190282121	0.210366984778344
RHOH	324.913831630318	1.2645984417226	0.51629856680655	2.44935493341477	0.0143112345319606	0.210366984778344
RNMTL1	58.5969509116494	1.11446410262133	0.454679797001549	2.45109659582595	0.014242172751307	0.210366984778344
KCNE3	998.755035332788	-0.6934444279721	0.283325972360321	-2.44751450844827	0.0143845333764719	0.210366984778344
MKL2	72.37857185712	1.24813277119479	0.509148931548267	2.45140997821474	0.0142297775244998	0.210366984778344
ALKBH2	16.3485852805591	1.50993247346172	0.616479675816991	2.44928183797897	0.0143141394184002	0.210366984778344
TMEM194B	37.2213456634821	1.16337974509839	0.474547305073684	2.45155695261561	0.0142239675191645	0.210366984778344
TRIM33	322.053859484754	-1.42510168130934	0.582182423071445	-2.44786105666136	0.0143707061043325	0.210366984778344
PRIM1	359.504408551169	-1.32539623542964	0.540868792883448	-2.45049493124527	0.0142659971187881	0.210366984778344
SEC63P1	50.5246951933863	-1.91068099091218	0.780287565635582	-2.44868824656437	0.0143377486092867	0.210366984778344
RPL21P129	28.9337134942855	-2.11936533700781	0.866063246369921	-2.4471253639859	0.0144000742240782	0.210366984778344
BAHCC1	38.2382149173655	-1.61832453280281	0.660730468797747	-2.44929605826636	0.0143135742490704	0.210366984778344
TCEA1P2	52.2478271647276	-1.99080289282497	0.814106215438895	-2.4453847115658	0.0144697702080732	0.210536413167991
ITGB3	3256.17015035262	2.13546554703573	0.873278390995973	2.44534339685222	0.0144714280631866	0.210536413167991
FZD3	37.0709125909362	1.25337400296652	0.512966523973879	2.44338362132642	0.0145502615746797	0.211037940237631
MAP10	70.2503033984649	-1.70872088096868	0.699292336710085	-2.44350008039211	0.0145455663570992	0.211037940237631
CTD-3105H18.16	59.4130632868744	-1.00767384449427	0.412377134094433	-2.4435735184665	0.0145426062805498	0.211037940237631
IL1R2	4125.58608037431	-2.5984978245223	1.06414170789045	-2.4418719849573	0.0146113267571698	0.211708482719114
AAMP	173.206095491781	1.13037947970421	0.463002427784199	2.44141156044017	0.014629971241301	0.211763640523173
PRICKLE3	28.7333559743697	1.02359825089666	0.419549795648015	2.43975390171663	0.0146972704621633	0.212231106385088
TBC1D22A	145.134544636658	0.770905478014207	0.316007318286955	2.43951780038896	0.0147068780980138	0.212231106385088
MAPKAPK5	125.50227314981	0.81217073153531	0.332857040469965	2.43999865644601	0.0146873165352732	0.212231106385088
MORC2	311.739248262391	1.5105902825112	0.619497475437964	2.43841232999902	0.0147519365157747	0.212666300962765
POLRMTP1	48.732130396928	-2.20138979675975	0.903216472803645	-2.43727817532655	0.0147982904905862	0.213119275359886
ITGA3	50.8164060730506	-1.64390037854314	0.675306414619594	-2.43430292228034	0.014920502465944	0.213158569763717
ERO1LB	48.3228772207839	-1.01629093212167	0.417435280080004	-2.43460718491952	0.0149079638364879	0.213158569763717
CEP76	67.9054206300868	0.783358087513986	0.321670592517874	2.43528039471142	0.0148802539262878	0.213158569763717
GYPC	4560.23711314505	-1.53038831254501	0.628355986639683	-2.43554345798344	0.0148694383470431	0.213158569763717
TRMT61A	21.5567229839947	1.15000319030136	0.472393453492048	2.43441813556106	0.0149157534468826	0.213158569763717
ACER1	12.3184744505502	-1.5274156205331	0.626900486659475	-2.43645626863705	0.0148319627632729	0.213158569763717
ZNF74	20.0169768588732	1.15356610216465	0.47357087092266	2.43588905693704	0.0148552399249586	0.213158569763717
TCEAL3	62.659995212995	1.2014980353759	0.493331343136853	2.43547881579176	0.014872095402979	0.213158569763717
FAM78A	451.334377323827	1.06151543275726	0.436271470028789	2.43315345073382	0.0149679559556123	0.213211662932885
MED9	22.9055561686433	1.10420553106009	0.45382151713196	2.43312731850707	0.014969036312973	0.213211662932885
FAR1	805.13969092352	-0.705737558487489	0.290015311732953	-2.43344930400549	0.0149557295929256	0.213211662932885
MS4A12	8.31761043285835	-2.85679392381608	1.17574900371003	-2.42976512402016	0.0151086102894969	0.213352776272429
ERP29	1213.04566612478	0.830967870419506	0.341747545252204	2.4315254987604	0.0150353899713947	0.213352776272429
PTDSS1	559.703381100362	1.06571466858274	0.438488484009359	2.43042795294937	0.0150810040704383	0.213352776272429
GPR146	238.187636264142	-1.5789999351419	0.649889083198505	-2.42964526711337	0.0151136069688849	0.213352776272429
FAM84B	21.5402499841743	1.83614786577367	0.755631448799254	2.42995162349506	0.0151008382608319	0.213352776272429
ANGPTL7	5.95985618729228	-2.5681376615545	1.05731158125405	-2.42893174262642	0.0151433830131706	0.213352776272429
RP11-396M11.1	9.67286126011925	-3.68682194520156	1.51611624161396	-2.43175413863834	0.0150259029875792	0.213352776272429
FAM200B	96.384344688509	-0.843411953993024	0.346838025333363	-2.43171709094578	0.0150274398541789	0.213352776272429
DPP3	167.639396228891	1.17626419783482	0.48383204647224	2.4311415632993	0.0150513325236407	0.213352776272429
GBA	441.652891974778	0.952899039708688	0.39230754678973	2.42895923748167	0.015142234670834	0.213352776272429
RP11-500M8.7	406.807199642735	0.792588197584781	0.326138115005206	2.43022253799477	0.015089554661056	0.213352776272429
ERMP1	182.332756269825	-2.0101524383638	0.828161912586247	-2.4272456965406	0.015213948649238	0.213529165549544
MYH3	56.3753427594877	-2.19688756274868	0.904814276493372	-2.42799834156327	0.0151824127003905	0.213529165549544
CYP2E1	66.4536615113105	-2.21852003254329	0.914023355136086	-2.42720278434568	0.0152157484139495	0.213529165549544
RALGAPA1	144.004665024374	-1.40278626597228	0.577850117381269	-2.42759536388	0.0151992903642959	0.213529165549544
MAP4K4	136.057891195348	-0.853131576072419	0.352010986667376	-2.42359360470349	0.0153677922502474	0.213789261810469
RPH3A	10.5928207401708	-3.5351786601268	1.45985958944975	-2.42158813469127	0.0154528533598473	0.213789261810469
ABHD14B	238.871752343477	1.37001592365589	0.565560936979801	2.42240196250473	0.0154182853879323	0.213789261810469
NDUFB3	72.9822658602341	-1.60313126227279	0.661742879254467	-2.42258936594666	0.0154103349280864	0.213789261810469
ISLR	10.4240883611966	-2.86649991770343	1.18328542982453	-2.42249236359523	0.0154144497343324	0.213789261810469
NDUFB5	559.19752648079	0.616677128310852	0.254528335249817	2.42282309239005	0.0154004243041348	0.213789261810469
DUOXA1	6.28077599443818	-3.40346994835686	1.40438261696691	-2.42346345450176	0.0153732999802766	0.213789261810469
USP3	1158.91269297032	-0.651619349080667	0.26901821255029	-2.42221276731907	0.015426315523256	0.213789261810469
SOX13	41.2042451035711	-1.35634594230607	0.559415842795844	-2.4245754920478	0.0153262964395327	0.213789261810469
RBP7	384.129850511012	-1.01872133930582	0.420629319158349	-2.42189807725295	0.0154396802736126	0.213789261810469
CAMK2N1	5.48093120767247	3.65701052700649	1.50732123153938	2.42616533920358	0.0152593166116812	0.213789261810469
BET1L	1522.65656496914	-1.25173510238146	0.516850500790205	-2.42185138733095	0.0154416640422278	0.213789261810469
ZNF551	30.7502864771809	-1.32611189547629	0.546816014559756	-2.42515189783524	0.0153019827718058	0.213789261810469
YY1P2	83.7305456626046	-2.48474391916592	1.02430195132318	-2.42579242962114	0.0152750040123623	0.213789261810469
DBIL5P2	53.0603408929333	-2.36319097097477	0.975942800130717	-2.42144413653981	0.0154589768910037	0.213789261810469
STXBP3	1179.20438001551	-0.746269573176564	0.308317879707599	-2.42045506372938	0.0155010950219364	0.214164209247896
APBB1IP	1568.95234040946	-0.856603652923598	0.354250501386076	-2.41807322663472	0.015602936518544	0.214307703415367
PIBF1	55.1820875126523	-1.04194552764494	0.431071375810156	-2.41710673942734	0.0156444287508111	0.214307703415367
HNRNPA1	161.963672725897	1.21547000680525	0.502838146076779	2.41721917139448	0.0156395969531953	0.214307703415367
SSRP1	420.018695111448	1.45745025102539	0.602985806024475	2.41705565282616	0.0156466246467778	0.214307703415367
SPSB1	33.8971906247007	1.32955554474151	0.549656313139265	2.41888524330411	0.0155681507363957	0.214307703415367
SPHK1	305.594261614934	-1.7976683163939	0.743616194044756	-2.41746795025514	0.0156289102731931	0.214307703415367
ZC3H12D	57.2080361634242	1.26163690279449	0.521386131021392	2.41977457344895	0.0155301312534434	0.214307703415367
LIN54	165.070463340067	1.17854604428124	0.487425638304336	2.41789916587315	0.0156104019593096	0.214307703415367
FAHD2P1	15.7258684321482	-2.91847667254769	1.20687076346144	-2.41821805690046	0.015596727163985	0.214307703415367
LTF	6054.15642319203	2.08997040908917	0.86524717975193	2.41546052734708	0.0157153257504187	0.215003925275061
DLL3	19.4870534084271	-2.44915065163413	1.01425637877546	-2.41472541152865	0.0157470759748351	0.215003925275061
MICALCL	133.058016337462	-1.21337564332666	0.502613784572058	-2.41413124862813	0.0157727795517789	0.215003925275061
ARHGEF3	616.276225398281	0.997967834393669	0.413297796765299	2.41464590957011	0.0157505131050592	0.215003925275061
DPP4	172.631736032684	1.90487208550693	0.788956670607789	2.41441913918983	0.0157603207577426	0.215003925275061
PSMD3	310.080679849462	0.96769628635871	0.40119628899158	2.41202701249069	0.0158641061334947	0.215221029217905
PITPNM1	253.831898099043	0.807707248109064	0.334836828201534	2.41224136677975	0.0158547816536368	0.215221029217905
TP53TG5	7.31617221797373	-2.64997133679315	1.09855950302062	-2.41222376166858	0.0158555472998665	0.215221029217905
ZNF605	14.6772675690023	-2.74579424396935	1.13814854272374	-2.41250956346901	0.0158431218003773	0.215221029217905
SEPSECS-AS1	7.61728860791687	-1.68302665320379	0.697756467100805	-2.41205453845066	0.0158629084756488	0.215221029217905
GCLC	239.142302019405	-0.965376449228225	0.401323629957984	-2.40548120560281	0.016151182709494	0.215559428157569
CD38	734.766086843057	1.60466219112332	0.667704311050463	2.40325270417798	0.0162499537097045	0.215559428157569
GRN	4145.7294294817	1.15992355874464	0.482193309329814	2.40551566415714	0.0161496595990852	0.215559428157569
P2RX6	16.1190836617729	-2.35992428830794	0.98098406989329	-2.4056703474957	0.0161428239608214	0.215559428157569
TTLL1	23.4025568997968	1.05730968763921	0.43928100504921	2.40690964436482	0.0160881497223395	0.215559428157569
CDC25B	356.262759548177	1.56546825720433	0.651227426708667	2.40387335207345	0.016222392343028	0.215559428157569
POFUT1	52.9477287730816	1.12378255959742	0.466887243885368	2.40696779429112	0.0160855883165093	0.215559428157569
SNAPC2	297.934143417122	-1.46988657943486	0.610536224603533	-2.40753377146356	0.0160606766982469	0.215559428157569
CDK6	218.803033816382	1.39724226916037	0.58073602564619	2.40598517649332	0.0161289191527655	0.215559428157569
MCM3	369.904641652756	1.39673515905771	0.581367478158623	2.40249964356729	0.0162834504297019	0.215559428157569
SPTBN1	886.922770541424	1.13333901987922	0.470662551447802	2.407965146989	0.0160417123851524	0.215559428157569
METTL8	410.656854913423	-1.39642896282519	0.58106984884593	-2.40320327340793	0.0162521505703688	0.215559428157569
CTNNBL1	200.934861148179	0.923850697736659	0.383940837730803	2.40623191634647	0.0161180289446611	0.215559428157569
TPP2	676.655709400296	0.809212590363771	0.336771905487266	2.40285064513604	0.0162678300658199	0.215559428157569
SCAMP2	893.575158219978	0.992556186642541	0.411916984457773	2.40960247839523	0.0159699103758903	0.215559428157569
LYST	2127.64073866902	-0.657204322831519	0.273525186008214	-2.40271959018714	0.0162736607665236	0.215559428157569
STAR	12.0637806566504	-2.38992157239359	0.992045406112051	-2.40908486412934	0.0159925787454721	0.215559428157569
ELP6	72.5126546001133	1.04350040940251	0.434393857831326	2.40219881241437	0.0162968485833813	0.215559428157569
RNASE8	54.7444750660286	-2.19818796043528	0.914632619915205	-2.40335618101951	0.0162453557145985	0.215559428157569
UFSP1	177.64021451839	-1.92877803635694	0.802058343584428	-2.40478520270379	0.0161819739331966	0.215559428157569
EID2B	45.8438247777109	-1.81465830272545	0.753421183312146	-2.40855758096415	0.0160156996364802	0.215559428157569
BRF1	343.387630182846	-0.982309424463924	0.408445690219907	-2.40499397590668	0.0161727323778705	0.215559428157569
ZC3H6	190.775154604989	-1.04487635338467	0.434757753197511	-2.40335300681798	0.0162454967432946	0.215559428157569
TNF	115.846543176656	1.24099248446599	0.514713620259183	2.41103486603112	0.0159073276676312	0.215559428157569
SLC9A7P1	8.43029953766255	-1.96342508686635	0.81570652880687	-2.40702387136492	0.0160831185558652	0.215559428157569
SLC22A31	10.8461879344561	-2.08970917863247	0.867982878607246	-2.40754654283687	0.0160601149547534	0.215559428157569
NDUFA7	303.302387408193	0.644118752681089	0.26781640123503	2.40507582698725	0.0161691104236663	0.215559428157569
CHPT1	1681.76878602127	-1.23747295017947	0.515401383610415	-2.40098880121528	0.0163508368871236	0.215668583178228
UNC45A	319.755756283863	0.872945635174	0.363732823975934	2.39996386807191	0.016396690234478	0.215668583178228
AFG3L2	112.322905912912	0.975791651656407	0.406341427138961	2.40140824066827	0.01633210456106	0.215668583178228
CHEK1	21.3931196351329	-1.88657907200401	0.786190183416603	-2.39964719961953	0.0164108801381415	0.215668583178228
ANAPC10	111.81359073556	-0.892648030718986	0.37190248075076	-2.40022069472889	0.0163851897570304	0.215668583178228
POU3F3	68.7659480467421	-2.13711974244715	0.890371749973573	-2.4002555589961	0.0163836291114687	0.215668583178228
DCAF13P3	55.7115561809426	-2.46974026958033	1.02913559204512	-2.39982009044349	0.0164031315690754	0.215668583178228
TRPM7	264.827425053795	-0.811508492748956	0.33822799421216	-2.39929428266048	0.0164267070462925	0.215677978808359
TUBB2A	173.689133273701	-2.66560973481324	1.11175677556305	-2.39765548850668	0.0165003762070786	0.216446111422267
GLTSCR1	131.182320092493	0.741855755419107	0.309753525958644	2.39498728262469	0.0166209417505021	0.21687442509445
HRH3	5.55675402506632	-2.2080497744182	0.921799564975031	-2.39536864446015	0.0166036622896644	0.21687442509445
SWT1	47.5032961752933	-1.07697831013374	0.449693685178528	-2.39491535156021	0.016624202708333	0.21687442509445
RP11-231C14.4	166.265842166386	-1.29982135368718	0.542724809801422	-2.39499158728854	0.0166207466185942	0.21687442509445
RNASE10	49.0333458019521	-2.73479323923737	1.1415168183395	-2.39575378592803	0.0165862275870249	0.21687442509445
RFKP1	66.6924524265439	-2.23414034461215	0.932656194048122	-2.39545971910082	0.0165995380425093	0.21687442509445
WDR37	67.2355273413716	1.09478924807813	0.457552352391883	2.39270816192956	0.0167245380075194	0.216932122212299
UHRF1BP1	89.7795780661028	1.14338492627222	0.477935372293363	2.39234212940907	0.016741228555511	0.216932122212299
MAST4	113.220329537607	1.12294563864927	0.469905464830324	2.38972670610406	0.0168609141714166	0.216932122212299
GTF3C1	285.682172098547	0.80282075619549	0.335809207758591	2.39070501239092	0.0168160577969863	0.216932122212299
MTMR2	118.122333486931	1.04908521803463	0.438900094910057	2.39025972015252	0.0168364619099565	0.216932122212299
CABIN1	285.997239565079	2.03415990621275	0.849542553422378	2.39441791116661	0.016646769293868	0.216932122212299
AMBRA1	170.819728376685	0.810238346584269	0.338455403279761	2.39392941797576	0.0166689561591281	0.216932122212299
HMGCL	278.151709716829	0.745543074633228	0.31195413140201	2.38991248900134	0.0168523877599895	0.216932122212299
APOBEC3F	144.738616731527	1.38775920817739	0.580874545290335	2.38908593848566	0.0168903509334576	0.216932122212299
MEN1	168.461981646118	1.55291687780933	0.64993824369935	2.38932989843829	0.0168791381388332	0.216932122212299
SLC5A6	110.14103705208	1.23707965348271	0.517050239328007	2.39257147446737	0.0167307690460864	0.216932122212299
POLL	84.66467509703	-0.944367496940976	0.394958800165397	-2.3910531846499	0.0168001190255894	0.216932122212299
PPP2R3B	214.85002270016	-1.74917323701203	0.732230777456328	-2.3888277997388	0.016902222526631	0.216932122212299
TAS1R3	70.9713622641136	-1.87435295013545	0.783751368565229	-2.39151473963832	0.0167790102175967	0.216932122212299
ZNF713	58.2971619506998	1.25013554501263	0.52254735913443	2.3923870691518	0.0167391785817331	0.216932122212299
ZNF552	95.6865622490302	-0.99626320958774	0.41671117079494	-2.39077634440953	0.0168127912500374	0.216932122212299
GPRIN3	158.477984931857	1.28633082151142	0.538388499014371	2.3892241826605	0.0168839962048153	0.216932122212299
RPS19P1	33.3800685280011	-2.27898429567079	0.953347740742619	-2.3905068405528	0.0168251357146204	0.216932122212299
HMGCR	558.777787447083	-1.44589655376677	0.60569283610818	-2.38717790201587	0.0169782731299381	0.216932778970884
TCF19	12.0301872484117	1.39144266880214	0.582813322003809	2.38745858453977	0.0169653141537771	0.216932778970884
TCF19.1	12.0301872484117	1.39144266880214	0.582813322003809	2.38745858453977	0.0169653141537771	0.216932778970884
TCF19.2	12.0301872484117	1.39144266880214	0.582813322003809	2.38745858453977	0.0169653141537771	0.216932778970884
TCF19.3	12.0301872484117	1.39144266880214	0.582813322003809	2.38745858453977	0.0169653141537771	0.216932778970884
ANKRD32	112.127459937364	-0.732895461229197	0.307125565121268	-2.38630561718239	0.017018601560661	0.217081445874581
TNIK	238.941665931416	1.12663122269066	0.472130995187795	2.38626829031322	0.0170203291713604	0.217081445874581
ANKS3	26.0210107762365	1.00230146898856	0.420089387188913	2.38592428077176	0.0170362583143241	0.217090605948244
CASP1	1094.27316988088	-0.797217291217844	0.334253684577493	-2.38506657667978	0.0170760307352193	0.217209546036586
ZDBF2	28.9636058437705	1.55594123138226	0.652329372173182	2.38520799116982	0.017069467629371	0.217209546036586
MFNG	721.327653302113	0.897689267654867	0.376535858477265	2.38407378060932	0.0171221691846862	0.217413410043873
SLC35B4	100.242129496539	1.25271980919025	0.525455140926331	2.38406613927463	0.0171225247259889	0.217413410043873
OR5AN1	78.565371273638	-2.33402792201896	0.979151034385632	-2.38372614648101	0.0171383507026434	0.217420925536113
YDJC	80.2858502689787	-1.2689987217766	0.532585147089521	-2.38271519345111	0.0171854843545923	0.21743903608931
PPM1L	147.652920382542	1.01030960820095	0.423979638817453	2.38292011149136	0.0171759212849427	0.21743903608931
TMEM129	55.6357864265146	0.954868018399565	0.400723532456167	2.38285985489014	0.0171787328419984	0.21743903608931
BCAT2	94.1606368503704	1.37964819142957	0.57949133517333	2.38079175250637	0.0172754749873443	0.217475011472185
TREM1	921.895644633573	-1.25290494900246	0.526199577212225	-2.38104514572262	0.017263596074174	0.217475011472185
PLXNC1	3837.53832359692	-1.1991669770489	0.503703418828086	-2.38070049204526	0.0172797549754385	0.217475011472185
NANP	57.3758683293252	0.928058484720521	0.389798501999298	2.38086724284588	0.0172719352986126	0.217475011472185
TCEAL1	5.71737747213972	1.76987707179309	0.743002588548413	2.38206043837728	0.0172160716307547	0.217475011472185
SAMD9	570.404162376891	-0.815659173210329	0.342524333542389	-2.38131745203261	0.0172508385140719	0.217475011472185
RCC1	208.236454996339	0.933004321168472	0.391989452418471	2.3801771078586	0.0173043189282982	0.217592281713367
SCRN2	46.218031654117	1.23358572770178	0.518915259572607	2.37723926006299	0.0174427699404651	0.218755019850894
EIF1AD	108.684278832365	0.959323367663283	0.403495751262898	2.37753028293533	0.0174290117908051	0.218755019850894
ZNF429	307.445558760969	-1.46408175701666	0.615779000126818	-2.3776091044273	0.0174252871309831	0.218755019850894
SLC5A2	6.0079646717685	-3.33699209146171	1.40421166440144	-2.37641672979844	0.0174817066851199	0.21905084970152
RNF10	3104.02644122267	-1.1018202571502	0.463906685575427	-2.37509027442342	0.0175446586622725	0.219132942299225
SCD	119.869132863527	1.87117869726174	0.788285003888514	2.37373372324914	0.0176092444052497	0.219132942299225
TNFRSF10A	87.7418074075925	1.13309999477924	0.477346245868251	2.37374862500119	0.0176085337985307	0.219132942299225
CNOT6	534.369630303608	0.712387040361877	0.300158038434794	2.3733731872606	0.0176264446300106	0.219132942299225
ACO1	69.2181398819899	1.27304302351907	0.536343662727861	2.37355843274876	0.0176176052159932	0.219132942299225
ATP1A1	2544.63908940158	1.19292907304109	0.502354362590764	2.37467644729681	0.0175643390286791	0.219132942299225
OR52R1	63.7368315088851	-2.27767295261588	0.958801199830403	-2.37554245136402	0.0175231765985882	0.219132942299225
NDUFS3	764.143259078151	-1.10087206916313	0.463499592289124	-2.37513060955709	0.0175427414796311	0.219132942299225
C8orf88	21.512927412222	-1.89832346554526	0.799763136723229	-2.3736071073781	0.0176152832389399	0.219132942299225
STAB1	198.150553548485	-1.27147735654382	0.536031921985159	-2.37201797951694	0.0176912298100329	0.219404174556323
USP36	221.85967147887	1.36870034235464	0.57719150047277	2.37131063301097	0.0177251270504092	0.219404174556323
EMC6	11.7740452995132	-1.23997549652842	0.522829997211372	-2.37166096655146	0.0177083313673063	0.219404174556323
ZMAT2	1605.47310356496	-0.945351767564257	0.398506271450654	-2.37223811841896	0.0176806919800671	0.219404174556323
SLC22A15	212.380921716984	-1.19816174932517	0.505243015417246	-2.37145633440511	0.0177181401423564	0.219404174556323
OAS3	534.544853489774	1.30163580507119	0.549357032749568	2.36938043471733	0.0178179151513366	0.219410944814388
PLAC8	2964.66068874063	1.37010116236341	0.578180480901724	2.36967730253815	0.0178036165442403	0.219410944814388
IQCC	19.4694378343559	-1.57567983930105	0.664859836410204	-2.36994288571958	0.0177908332802778	0.219410944814388
KCNK5	26.3136662893183	1.67506627382973	0.706616890590682	2.37054377858062	0.017761940300803	0.219410944814388
GEN1	51.8870334800673	-1.03291997237936	0.435938777729034	-2.36941521412759	0.0178162394845378	0.219410944814388
TMEM107	215.241949811162	-1.44508203125574	0.609681581345549	-2.37022418828282	0.0177773021699362	0.219410944814388
SEH1L	257.605361526999	0.793769279420252	0.335295587328183	2.36737168462441	0.0179149310438658	0.219744433025386
ASCC3	231.891560472841	0.943353392694946	0.398382502600761	2.36795890014358	0.0178865227496833	0.219744433025386
MTR	281.145843001218	0.844452547545127	0.356726616369567	2.36722607395877	0.0179219815051534	0.219744433025386
TESPA1	357.934321119457	1.83787940166568	0.776112975730164	2.36805653189423	0.0178818033522351	0.219744433025386
SPOPL	473.748931740177	-0.870387852908008	0.367649676504547	-2.36743810353181	0.0179117158506699	0.219744433025386
HHATL	5.37015924527213	-2.68124626873656	1.1330191681673	-2.36646152515987	0.017959040823526	0.21995501826612
UTP20	45.2826611685298	1.07522190992253	0.45440911974781	2.36619791107903	0.0179718343169047	0.21995501826612
RP11-767N6.2	122.313586104917	-1.50828205855897	0.637503745085712	-2.36591874194587	0.0179853914179205	0.21995501826612
SLC7A8	13.6910271620127	3.02026984917658	1.27743745472298	2.3643191594312	0.018063243703569	0.220258269706533
DROSHA	122.063776448387	0.929601128437811	0.393227928438705	2.36402620772323	0.0180775337065581	0.220258269706533
SPOCD1	106.498166948971	1.90373447343369	0.80546951357393	2.36350903585	0.0181027851993948	0.220258269706533
REM2	225.405777103573	-1.44363136179063	0.610752072400183	-2.36369457760058	0.0180937223657925	0.220258269706533
MTA2	712.564559454981	1.05132952991758	0.444591387232347	2.36470961901057	0.0180442127082594	0.220258269706533
BANF1	133.553350294865	0.939380979111543	0.397450982371591	2.36351404519434	0.0181025404645003	0.220258269706533
UQCC2	190.892419757523	0.833605342941327	0.352785027880523	2.36292721363346	0.018131230236159	0.220416454795964
SARM1	32.1976074698951	1.54543341348442	0.654513299163536	2.36119482286986	0.0182161579756069	0.220808234867262
SPATA6L	47.7575450419859	-1.81004505515827	0.766689811513997	-2.36085706106351	0.0182327567332519	0.220808234867262
MYRF	15.0774144383697	-2.57451718397244	1.09018046818305	-2.36155137530878	0.0181986501398575	0.220808234867262
C2orf91	18.0723120743873	-2.17185844295977	0.92000877305166	-2.36069318747444	0.0182408148058087	0.220808234867262
EBLN2	61.1508559002589	-1.7360038573589	0.735053399878096	-2.36173842287759	0.0181894714148909	0.220808234867262
NRD1	387.671751852263	-0.659120975940808	0.279461681070446	-2.35853793413151	0.0183470845151403	0.221260323593796
IL2RB	448.661180111367	1.84406709798262	0.78206282869967	2.35795262261568	0.0183760380566126	0.221260323593796
HSPBP1	126.140200050885	1.26804738683775	0.538109141009613	2.35648735581522	0.0184486957032384	0.221260323593796
ATAD2	170.646593259122	1.03690973209016	0.439955318293704	2.35685236426201	0.0184305726868662	0.221260323593796
AQP7	14.2884793635298	-2.8652646796229	1.21584056935673	-2.35661216761244	0.0184424969248344	0.221260323593796
KCNAB3	23.962915478858	-1.60505415421776	0.680492762322316	-2.35866454881929	0.0183408265363101	0.221260323593796
LRRC74B	14.5091015950988	-2.73443703843679	1.16027326551266	-2.35671812814595	0.0184372358253135	0.221260323593796
CSF2RA	762.720980204921	-0.84940792207574	0.360229867850392	-2.35796084079433	0.0183756312521795	0.221260323593796
CARD16	3178.56304226545	-1.03041684672453	0.43676096399102	-2.35922376695212	0.0183132093145873	0.221260323593796
RP11-301G23.1	55.7599454346165	-2.37955017861539	1.0088822867826	-2.35860041333856	0.0183439962231363	0.221260323593796
NAT6	11.9278110887389	2.0809603308072	0.883005239304525	2.35667948295099	0.0184391544650475	0.221260323593796
FAM46A	652.256008505991	1.18633311412262	0.503580845028651	2.35579475636155	0.0184831268038468	0.221368384630972
CYP1A1	13.9431928753939	-2.46271321273511	1.04557353127775	-2.35537065453975	0.0185042378688866	0.221368384630972
RRP1B	294.6640687854	1.62269504378639	0.688904357597581	2.3554721724293	0.0184991825614626	0.221368384630972
HIST1H4J	96.0551881676216	-2.76887444222946	1.17600099849593	-2.35448307082287	0.0185484885771846	0.221711917063298
MLEC	370.191622179025	1.17378941227039	0.498872463679506	2.35288475056918	0.0186284067818679	0.222480854887715
MYPOP	18.9160721028498	-1.14932083667905	0.488572468074376	-2.35240606415851	0.0186524003114263	0.222581151542371
IL32	4205.32309622955	1.5952960652168	0.6785743365728	2.35095254747474	0.0187254217053558	0.223051348722393
TFAP4	98.5309488459033	1.24713860562894	0.530541730267301	2.35068899292917	0.0187386888395564	0.223051348722393
KCND1	10.6734754554682	-1.64247116613091	0.698555227390479	-2.35124024805672	0.0187109484596607	0.223051348722393
RP5-1053E7.3	321.880753858	-1.74822864628796	0.744247164151569	-2.34898932840532	0.0188244463204335	0.223885414904356
NSMF	43.845676972478	-2.78949072802661	1.18813331193244	-2.34779270980093	0.0188850280742723	0.224232213540777
TRIQK	81.4523767734218	-0.793712044921139	0.338049351255313	-2.3479176693396	0.0188786937277875	0.224232213540777
ACD	102.757025847314	-1.70474896042848	0.726394527145065	-2.34686371761173	0.0189321780865335	0.22423240302988
IL3	9.15699228434134	-2.68586727001473	1.14444714025073	-2.34686878541748	0.0189319205964374	0.22423240302988
ABHD16B	74.2134704002139	-1.64037235350905	0.698895426592683	-2.3470926995564	0.0189205468014509	0.22423240302988
SNX11	314.297196738392	-0.665458751406385	0.283659433978341	-2.34597785828339	0.0189772347868656	0.224539439794202
ALDH18A1	87.5469955242897	1.39196578238236	0.593714857335995	2.34450218852217	0.0190524987101162	0.224539439794202
HPCAL4	6.58994273631782	2.52702358700746	1.07776161349597	2.34469622536515	0.0190425873261994	0.224539439794202
CISD2	401.022257482577	-1.01912353727226	0.434642596961185	-2.34473920503302	0.0190403925387027	0.224539439794202
LPCAT4	164.867815863659	-1.4546320203271	0.62039073413969	-2.34470300776537	0.0190422409633805	0.224539439794202
LRRC37B	125.090353799584	-0.852455990610787	0.363543407965199	-2.34485338458506	0.0190345629523576	0.224539439794202
ZNF701	115.337203429259	-0.828027048073789	0.353235808036678	-2.34411978976891	0.0190720448064149	0.224584342802932
AKR7A2	76.0344626477004	1.01550334156722	0.433466666426002	2.34274840540843	0.0191422865874341	0.2252256505984
SLC22A1	24.4742181540361	-1.89754416300995	0.810418570996839	-2.34143716706283	0.0192096590879654	0.225832170101682
DNAJB7	110.262345341172	-1.96471948685502	0.839514959459024	-2.34030312946545	0.0192680939111934	0.226332704774117
CFH	25.8419156254226	1.62003842930566	0.692740034443975	2.33859506994709	0.0193564002035864	0.226438150578348
ARID1B	612.695038249115	1.10218896154749	0.471185606477093	2.33918215326697	0.019326008322767	0.226438150578348
SORBS3	21.370977821621	2.1551846898204	0.921475580068462	2.33884080754509	0.0193436738853421	0.226438150578348
C9orf72	487.294661609337	-0.821278539020432	0.35102097003536	-2.3396851160707	0.0193000043312138	0.226438150578348
SRC	75.8215164742953	1.20129934906145	0.513559394979765	2.33916341674322	0.0193269776226379	0.226438150578348
EPCAM	18.3299098465135	-2.60707636791799	1.11514462036786	-2.33788184985189	0.0193933780599222	0.226499420352872
CCZ1B	1152.54378027342	-0.954286783968063	0.408143095801758	-2.33811815949859	0.019381119436353	0.226499420352872
ORC6	77.4648199554865	1.34026963908477	0.57349818966462	2.33700761962048	0.0194387878902728	0.226658807818605
SCLT1	244.6764604309	-1.41821218842305	0.606828438027724	-2.33708919943243	0.019434546492649	0.226658807818605
PDS5A	1059.80271024038	0.668976338288498	0.286322213478907	2.33644581801817	0.0194680183583785	0.226814333070023
AP1M1	923.820228258373	0.833602762833357	0.357224724413987	2.33355281944958	0.0196191495231915	0.22690118659112
MCM6	650.871617218554	1.23021562139877	0.527234903405114	2.33333493942358	0.0196305730280077	0.22690118659112
LAT2	45.5416437066607	-0.921775983627653	0.39505911519134	-2.33326089231281	0.0196344566591952	0.22690118659112
RNF24	584.143558311126	-1.00267235417527	0.429431049619284	-2.33488555395376	0.0195494002151928	0.22690118659112
LZTS2	31.8469171143249	1.36060517317668	0.583014286771798	2.33374242115141	0.0196092133832257	0.22690118659112
GPX7	84.6644794042365	1.17593903013112	0.503768521691842	2.33428445703968	0.0195808320528283	0.22690118659112
CD101	220.851975618352	1.69733969025167	0.727300448950463	2.33375311771226	0.0196086529574131	0.22690118659112
ACTL7B	13.3290835928708	-2.35995315683858	1.01093140430249	-2.33443450939866	0.0195729815636454	0.22690118659112
PPP4R1	1319.46638872008	-1.13577631624274	0.486773972340329	-2.33327248534288	0.019633848582348	0.22690118659112
ADI1	263.896562509798	0.735894813235801	0.315080581712405	2.33557653485451	0.0195133227331734	0.22690118659112
IGBP1	893.899774388623	0.562541829887491	0.241176486042158	2.3324903647081	0.0196749092175693	0.227171155914728
CATIP	10.9025828960117	-2.25251521924175	0.96595402571178	-2.33190727434667	0.0197055697185001	0.227171155914728
NACC1	169.484128958165	0.938718811051223	0.402553019826088	2.33191347429655	0.0197052434886684	0.227171155914728
APOBEC3G	727.230524671438	0.877830959014927	0.376560536767954	2.33118150550085	0.0197437909321859	0.227244664664643
LINC00921	43.1717762661008	-0.968815829386005	0.415583284326426	-2.33121943524811	0.0197417918332973	0.227244664664643
HAGH	348.721951802063	-1.18167392783777	0.507368557141325	-2.329024751742	0.0198577544857407	0.227654937072333
PPP1R16B	188.034107964048	1.3290111165847	0.57078193502784	2.32840430824054	0.0198906451081653	0.227654937072333
IL4I1	21.7668021571356	-1.77324314170149	0.761395711500629	-2.32893765346619	0.0198623688265255	0.227654937072333
ARRB2	7594.24406150432	-0.689903868606848	0.296300079165037	-2.32839582949479	0.0198910949081558	0.227654937072333
KLHDC9	20.8905459159174	-2.09077202460187	0.897266661141052	-2.33015681418837	0.0197978645365688	0.227654937072333
THOP1	61.3575657049319	1.03160849519974	0.442830533628254	2.32957851110093	0.0198284390005551	0.227654937072333
BHLHA15	68.6947371668464	-1.42405441979047	0.611307597275653	-2.32952187431809	0.0198314355613982	0.227654937072333
ZIC2	15.3583908794607	-2.06957529145602	0.889485748312186	-2.32670989432161	0.0199807108920542	0.228416265451249
C1QB	221.241603823248	2.06786383683073	0.888814097765875	2.32654257175772	0.0199896241275652	0.228416265451249
KLF12	203.587385866942	1.56988300394153	0.674896842228978	2.32610808898837	0.020012785136104	0.228497975569981
NPAS2	12.6181160239258	2.53536566791792	1.0901750614815	2.32565003319052	0.0200372281144033	0.228594180374711
CD9	541.219147536632	1.73115980453439	0.744579979725222	2.32501524574063	0.0200711450002366	0.228615627648346
DOLK	166.750198084248	-1.57150073071166	0.675836104709133	-2.32526898128357	0.0200575818267202	0.228615627648346
GNB1	1414.55422399006	0.640415398475501	0.275733235712313	2.32259051695777	0.0202011606420103	0.228889748838492
SUCO	474.529360918606	-0.654467920271659	0.281857920617239	-2.32197810456574	0.0202341146339409	0.228889748838492
TRPT1	78.3792653334792	-1.88340621071468	0.811156694339698	-2.32187717102899	0.0202395503807579	0.228889748838492
AKTIP	506.10270085726	-0.729019548968278	0.313935796566244	-2.32219312656321	0.020222538932596	0.228889748838492
LCORL	295.980706873832	-0.9936670062517	0.427715917800693	-2.32319388850693	0.0201687389470582	0.228889748838492
TDRKH	32.7209274007024	1.4920055745692	0.642261096749711	2.323051453871	0.0201763884630564	0.228889748838492
ZNF527	78.3578485335102	-1.74777889950749	0.752571163853432	-2.32241013668161	0.0202108620597837	0.228889748838492
ZNF98	20.3329971743582	-1.6720117087586	0.719409603862313	-2.32414427022106	0.02011776301882	0.228889748838492
HNRNPAB	1076.64872109839	1.14099844867285	0.491323471005591	2.32229583157826	0.0202170118512714	0.228889748838492
INTS9	88.4020235113002	0.89317001559827	0.384900110331239	2.32052418698872	0.020312538050425	0.229311627253088
ABHD15	116.946624404872	0.699981533750876	0.301697681910184	2.32014223416957	0.0203331842788703	0.229311627253088
MYLPF	6.14884607482801	-2.76449604318207	1.19159546291592	-2.31999544242737	0.0203411238860993	0.229311627253088
TAS2R39	122.406518177265	-2.15923413187305	0.930524588041438	-2.32044822847486	0.0203166424844111	0.229311627253088
PPP2R3C	361.682520134258	-0.907012162792599	0.391053425140535	-2.3194072842263	0.0203729630615549	0.22948928872495
NDUFB4	888.133745543624	0.645277631659772	0.278550309739801	2.31655686278913	0.0205278835203692	0.229692521968278
GBA2	211.66520747075	-1.07873660595891	0.465712789794556	-2.31631303584078	0.0205411830938627	0.229692521968278
CTSG	1032.78373836619	2.33316118744727	1.00735945171853	2.31611584471359	0.0205519444053735	0.229692521968278
SENP6	238.216110534644	-0.955907865915027	0.412592920751233	-2.31683050735468	0.0205129664845407	0.229692521968278
RFX5	263.620269612818	1.05085548292405	0.453711351359997	2.31613222762472	0.0205510501535314	0.229692521968278
FBXO25	108.894431406265	0.971965272445067	0.419616493582498	2.31631808403636	0.0205409076632029	0.229692521968278
TSPAN18	87.434377843553	1.5139331002934	0.653235572088766	2.31759133302017	0.020471541682939	0.229692521968278
PTPRM	9.37603916828337	1.99179056998199	0.859684442459353	2.31688567526469	0.0205099602918715	0.229692521968278
DPY19L2	52.5259997506346	-1.58178945094732	0.682862780275271	-2.31640894281817	0.0205359509387072	0.229692521968278
CNEP1R1	533.320865262649	-0.84648483128501	0.365434482452439	-2.31637919225419	0.0205375738408598	0.229692521968278
RPRM	57.2976531190243	-2.06598586645158	0.892293000440635	-2.31536711083842	0.0205928498455907	0.229969603283467
NFYA	450.620355323653	-0.627059036636849	0.271315820175152	-2.31117756506805	0.0208230490347259	0.23002055404304
MKS1	36.3899641643641	1.05156857164655	0.454970991367067	2.31128707456021	0.0208170034847312	0.23002055404304
ZW10	153.543762518331	-0.784912474267758	0.339345048132515	-2.31302174169711	0.0207214438011943	0.23002055404304
BIRC5	237.625230645336	1.14371716138393	0.494770393214325	2.3116119660145	0.0207990766208412	0.23002055404304
C12orf49	89.1468443343554	0.764830503382353	0.330912779462739	2.31127520860364	0.0208176584794522	0.23002055404304
BST2	1388.88944174309	0.826011579412222	0.357259241466618	2.31207897106114	0.0207733317860656	0.23002055404304
C5AR2	679.067104753173	-0.962395619207163	0.416164932590408	-2.31253415134417	0.0207482655582368	0.23002055404304
CCNJL	352.005888917316	-1.17155338265833	0.506088948369446	-2.31491595782308	0.0206175318666051	0.23002055404304
RPL29	5858.83804346115	0.817213710658511	0.353354699573384	2.31272914056374	0.0207375358071114	0.23002055404304
TK1	188.190060950289	1.5820414951295	0.684200310397084	2.31224901697478	0.0207639644760918	0.23002055404304
CHTF8	166.3735106782	0.816597079670712	0.352854264446622	2.31426161435621	0.0206533760208786	0.23002055404304
ZNF33A	647.974652646407	-0.674282213922681	0.291734837029811	-2.31128452394522	0.020817144275856	0.23002055404304
MBP	849.704177246829	-0.771412546737175	0.333461680971652	-2.31334690237693	0.0207035739094306	0.23002055404304
FNIP1	2571.50465508022	-0.909121407439407	0.392775683244983	-2.31460715675814	0.0206344408560088	0.23002055404304
NKTR	155.267076957338	-1.07819140869148	0.466699446605348	-2.31024788337328	0.0208744344519476	0.23006599771529
DMKN	37.6121440139226	-2.10306094057107	0.910326059624531	-2.31022820706515	0.0208755231951584	0.23006599771529
INAFM1	92.9625606020445	-1.21410095020496	0.525511492782558	-2.3103223561798	0.0208703141187774	0.23006599771529
SRXN1	222.263809242545	-1.03266947248233	0.447191140098033	-2.30923508962175	0.0209305393909144	0.230494335020934
CTD-2515H24.1	71.0691746882758	-2.32401764947662	1.00659938126538	-2.30878112259034	0.0209557300699078	0.230593816158616
EEF2	13220.151936288	1.20740750161059	0.52303329407436	2.30847159308931	0.0209729210398142	0.230605184191239
FOXQ1	25.7741132637168	-2.14552422260948	0.929723230551246	-2.3077020688591	0.0210157129378095	0.230897809891007
INHBA	48.3107274099227	2.05256647993273	0.89022452411429	2.30567280987331	0.0211289215102319	0.231779848235209
ULBP3	14.8073182536037	-1.60529946587556	0.696229368411479	-2.3057048994331	0.0211271271674132	0.231779848235209
C2	46.8004197713575	1.87666138243654	0.814031896193649	2.30539047820075	0.0211447142938791	0.231779848235209
PYCRL	19.47465791424	1.4588860846055	0.633062030034722	2.30449152751347	0.0211950674076288	0.232153493508579
TTC30B	223.089105761401	-1.51819188154229	0.659057240761659	-2.30358121820761	0.0212461631631063	0.232534693760624
UBE2R2	1027.19867382783	-0.980550997755535	0.425883739907474	-2.30239125346407	0.0213131177818992	0.23308874864618
RNASEH2B	432.580056705108	-1.14856280285075	0.49909731271543	-2.30128027859294	0.0213757937501495	0.233238018656065
FAM13A	57.7136572167637	-1.71609322937991	0.745705460284462	-2.30130168112927	0.0213745848052495	0.233238018656065
KIF2C	56.2340060941612	1.53180662493141	0.665555506294444	2.30154601749134	0.021360787426892	0.233238018656065
FUBP3	277.943175986738	0.975113568766374	0.424061780010052	2.29946110385911	0.0214787696331205	0.233647103813945
SFXN3	160.018248026653	0.935591353573103	0.406804336079576	2.29985590269148	0.0214563850960887	0.233647103813945
PIGHP1	234.39078194731	-1.59339076026698	0.692891917537943	-2.29962382290268	0.021469541230809	0.233647103813945
PLEKHA3P1	51.6251455934051	-2.050439689479	0.891504010223949	-2.29997808867279	0.0214494614406179	0.233647103813945
RP1-34B20.4	87.0336087191268	-1.52515406699257	0.663374788911584	-2.29908355349911	0.021500195223417	0.233702045870988
BAZ1B	204.414875980045	0.85783793388963	0.373431043990153	2.29717895096116	0.0216085633805571	0.233861354737023
WWTR1	5.55321774729653	2.16258412148698	0.941117572900375	2.29788942822759	0.0215680831382172	0.233861354737023
SLC39A9	345.52638304654	0.656277643786072	0.285824970969775	2.29608225467281	0.0216711787248175	0.233861354737023
DIDO1	347.087702392967	1.16666113165848	0.508129917023168	2.29598984939375	0.0216764617663643	0.233861354737023
UBE2D3	5677.6396699782	-0.562323110369953	0.244882144203816	-2.29630099082247	0.0216586774968225	0.233861354737023
PTBP3	1173.50663890494	-0.626613505778707	0.272989270655457	-2.29537777903939	0.021711483676188	0.233861354737023
PCOLCE2	45.9845881965764	2.15923984801852	0.940220145538217	2.29652582777036	0.0216458341381027	0.233861354737023
ECI1	47.2311461898007	0.964927518005275	0.4198861435135	2.29806944790083	0.0215578368035836	0.233861354737023
INSM2	39.9997820719919	-2.18344996598157	0.950042758157153	-2.2982649435873	0.0215467144075142	0.233861354737023
OXSR1	332.092093769405	-0.632168333238952	0.275393226356091	-2.29551155489039	0.0217038249843825	0.233861354737023
PDXDC1	585.573165084381	0.977326277284524	0.425470120485826	2.29705032204977	0.0216158992242406	0.233861354737023
TXNRD2	89.961956857927	0.979889874656299	0.426846236382735	2.29565073118666	0.0216958596119045	0.233861354737023
HDHD3	24.340599899581	0.931882856659255	0.406181494139972	2.29425237265518	0.0217760065785493	0.234026480338145
IQCF2	19.7268260554569	-2.7078478437354	1.18013415965808	-2.29452543304054	0.021760335899271	0.234026480338145
TOP1MT	138.388151307888	1.06363060346174	0.463598676725366	2.29429171578899	0.0217737481076058	0.234026480338145
LEPROTL1	262.308629031305	0.714825233748778	0.311658026790111	2.29362048239554	0.0218123078327172	0.234051824822085
MMS19	192.579625649469	0.810489476352175	0.353407737398884	2.29335521151138	0.0218275629791336	0.234051824822085
PP12613	133.42679652863	-2.13197106661867	0.929481321404212	-2.29372125886059	0.0218065148317189	0.234051824822085
PLEKHB1	93.7724864822295	2.1409340599334	0.934015418863119	2.2921827806005	0.0218950981579988	0.234092561247762
KDELR1	1035.77955272175	1.12514736531871	0.490869799743564	2.29215031339573	0.0218969709407064	0.234092561247762
ZBTB5	30.8639043049438	1.22190547058522	0.532962038314555	2.29266886333853	0.0218670764508004	0.234092561247762
HIST1H1T	82.6586132096059	-1.67083886723118	0.728758413648167	-2.29271983134569	0.0218641400544805	0.234092561247762
GLI1	11.9728804786349	-2.0279290924724	0.884897498891502	-2.29171072922317	0.0219223408840914	0.234188360103108
MPO	1658.133122706	2.42042164494165	1.0569489605603	2.29000806591318	0.0220208490776286	0.234304593307639
KLHDC3	254.396035959919	0.707513802312865	0.308982210855332	2.28982050569937	0.0220317239503119	0.234304593307639
FIGNL1	72.6295317821596	1.23119667899253	0.537534344220973	2.2904521213	0.0219951210480893	0.234304593307639
TOR2A	205.947909938627	0.909111853417112	0.396917220866784	2.29043187249926	0.0219962936697126	0.234304593307639
ZNF764	116.223502720291	-1.51706700786844	0.662462009857636	-2.29004378408727	0.0220187786422431	0.234304593307639
DDX53	51.4186696120452	-2.41370915796094	1.05390256984318	-2.29025834742968	0.0220063448530596	0.234304593307639
PSMD8	1092.91176702551	0.688394772247415	0.300731010666484	2.2890714553241	0.0220752010143535	0.23452586167433
ARRDC1-AS1	18.663457456239	0.97175455275356	0.424604074514155	2.28861334848346	0.0221018276311641	0.23452586167433
ZNF625	6.36062473131786	4.72324383687829	2.06377041683464	2.28864790305633	0.0220998182365819	0.23452586167433
BCAS1	15.8561494001701	-1.31109402039407	0.572995276929305	-2.28814106011529	0.0221293077645341	0.234643001794525
NCDN	40.240334710126	1.07092997334969	0.468274083142686	2.28697254856057	0.0221974254490578	0.234667893339965
GLG1	694.520570793194	1.3837393328101	0.605045843022906	2.28699915678574	0.0221958723118547	0.234667893339965
CCDC82	112.63120829979	-0.703574853788138	0.307616032446737	-2.28718525556681	0.0221850122621925	0.234667893339965
FLAD1	39.0946532648964	-1.46647046642229	0.641073752590261	-2.28752223983124	0.0221653588431548	0.234667893339965
YBX3	3602.33530577249	-1.13291629879675	0.495503330146281	-2.28639492384903	0.0222311650355468	0.23467691374802
FAM192A	776.463212560107	-0.832908605546148	0.364271172272204	-2.28650705558372	0.0222246118323478	0.23467691374802
RP11-1023L17.1	16.022022015706	-2.40061858669763	1.05017022124206	-2.28593283083038	0.0222581884112384	0.234788518111747
SLC29A1	69.9330239596726	1.39814849673496	0.611936156551164	2.28479471553836	0.0223248676744377	0.234809235510024
ICMT	156.835454784189	0.94866325920813	0.415174898139357	2.28497258254208	0.022314435464713	0.234809235510024
RAD9A	154.123113021836	0.520337232406015	0.227741021066676	2.28477605821252	0.0223259622048138	0.234809235510024
NOP9	64.8515581106314	1.17619474828056	0.514657307830992	2.2853940483962	0.0222897326782455	0.234809235510024
CTD-3162L10.5	99.7287158817302	-2.04054095515512	0.893290573864111	-2.28429697441936	0.022354083599297	0.234931871229136
MRPL38	95.0640284742803	1.04298875095353	0.456766113663728	2.28341971909365	0.0224056568114769	0.235222324151208
TAPBP	122.263445447651	-1.52461562684542	0.667734458936548	-2.28326635901577	0.022414683355216	0.235222324151208
SLC9A5	6.59017018828966	-2.90370681487929	1.27210881202252	-2.28259311423423	0.0224543469443363	0.235260827901356
WFDC8	14.4212112045024	-1.55972669668422	0.683632680942133	-2.28152740523568	0.022517256930581	0.235260827901356
PLD4	65.4967076926985	1.61243898675254	0.706663123214664	2.28176472463631	0.0225032344585163	0.235260827901356
TMED3	163.317081747869	0.880188446593551	0.385616558150746	2.28254837088574	0.0224569851179031	0.235260827901356
POLR2J3	1549.75386506155	-0.989825658257519	0.433831133041779	-2.28159203632395	0.0225134373263762	0.235260827901356
RP11-1074O12.1	92.6630726589704	-2.00724213283982	0.87964505026584	-2.28187736886965	0.0224965813148186	0.235260827901356
EIF4G1	1835.70267604143	1.28833887411752	0.564897707578405	2.28065870481286	0.0225686505662267	0.235296503814437
PHOSPHO1	1341.46182906638	-1.20243275359078	0.527118861667672	-2.28114158121108	0.0225400702946848	0.235296503814437
OR52K2	242.80094549649	-1.5568054799884	0.682619694128419	-2.28063370186845	0.0225701312865726	0.235296503814437
SMARCE1	902.541481159322	0.749840025076579	0.328884540672466	2.27994913820939	0.0226107052225894	0.235422308572906
POLDIP3	339.787496521543	0.670062292077988	0.293903270963072	2.27987354438862	0.022615189535696	0.235422308572906
MMACHC	44.3349328007477	1.12458778863367	0.493581980699478	2.27842148337741	0.0227014776215942	0.236148315317342
ERGIC2	711.591699514636	-0.82680023803185	0.363093105547901	-2.27710255413477	0.0227801022155318	0.236624898800076
SMPD3	18.6549775945968	1.63612174224759	0.718687378047253	2.276541639973	0.0228136113192898	0.236624898800076
SNX32	70.3265455643859	-2.12419485579073	0.933032441692851	-2.27665701734517	0.0228067151598672	0.236624898800076
DHX16	280.232819090541	0.983450058104072	0.431981762375868	2.27660087475723	0.0228100706023079	0.236624898800076
LRRC47	220.192302793126	0.907961269574188	0.398936179384947	2.27595619673809	0.0228486314606979	0.23668634982933
SPRED3	8.38167734052624	-2.38779107989781	1.04916889787777	-2.2758881670318	0.0228527039002815	0.23668634982933
BAG4	248.013539290484	0.599367724714935	0.263406304295419	2.27544942904147	0.0228789830764165	0.236786690693703
PCTP	136.615885574949	-0.695274500245851	0.305694815527199	-2.27440723535591	0.0229415128275548	0.2370908773908
CALM3	5234.74907155304	0.903947176878621	0.397443225348868	2.27440579993571	0.022941599052459	0.2370908773908
VDAC1	344.601459427057	1.15778149596319	0.509114095839934	2.27411007753201	0.0229593689391473	0.237102831765203
EML2	298.319762086439	0.773409246310648	0.34017868285696	2.27353824706251	0.0229937640046396	0.23728633396545
BAK1	418.75542784175	0.719319618971043	0.316465196638237	2.27298175790661	0.023027279264923	0.237289046692406
IL25	15.6509908629383	-2.51732242897254	1.10747536713112	-2.27302791889049	0.0230244975486922	0.237289046692406
KRTAP3-3	42.7229396708779	-2.52826813848169	1.11272979906333	-2.27213124031542	0.0230785847335308	0.237646148136328
CYFIP2	1397.3472733878	0.910036445865472	0.400876198646898	2.27011842792656	0.0232003985232196	0.237844634846279
KIAA1211	25.8111118261987	1.78119792328948	0.784878554682835	2.26939303241538	0.0232444355254296	0.237844634846279
LNPEP	84.8632559246144	1.50844333740805	0.664315025006591	2.27067472603542	0.0231666761095575	0.237844634846279
CTSD	5617.32156392041	1.0513594737417	0.463268822866095	2.26943714286076	0.0232417556164298	0.237844634846279
KHDRBS1	780.454027410358	0.635617979594877	0.280123582416762	2.2690627262121	0.0232645116483608	0.237844634846279
PSMB2	1944.31843059295	0.938620838371226	0.413478639071463	2.27005883660413	0.0232040134348697	0.237844634846279
SYNJ1	200.8214456941	-0.754432953891944	0.332405148293873	-2.26961874015551	0.0232307255849893	0.237844634846279
AGGF1	547.060393841177	-1.16651558808456	0.513736956499738	-2.27064760151269	0.0231683193921195	0.237844634846279
CDCA4	8.39663643443775	1.48224963482439	0.653041172655546	2.26976444501489	0.0232218789093638	0.237844634846279
EID3	89.9503312020056	-1.3175507762407	0.580624027005865	-2.26919781986113	0.0232562987919045	0.237844634846279
CPPED1	900.008588576427	-0.912355581186326	0.402164020570123	-2.26861562576616	0.0232917105436821	0.23795224973474
DFFB	89.6746490480828	0.903451090765651	0.39833670376543	2.26805886132369	0.0233256193251828	0.237957997862051
CD24	127.940207013073	2.05374338326243	0.905491214816589	2.26809862940352	0.0233231958982502	0.237957997862051
MOGS	273.319010727721	0.975115291017843	0.430013936683654	2.26763648298962	0.0233513721309939	0.238050559323961
ENTPD2	25.9791834375461	-2.44951149801076	1.08101273490537	-2.26594138895615	0.0234549720551701	0.238067745561551
ARID4B	739.871556105231	-0.717573412679753	0.316581111274834	-2.26663369077887	0.0234126121982167	0.238067745561551
MRPL28	354.008840420589	0.640669557303935	0.282803032991472	2.26542675489359	0.023486504046431	0.238067745561551
TOP2A	207.472455592477	1.26949892798405	0.560166223854622	2.2662896724625	0.0234336533323866	0.238067745561551
GBP4	563.099357558962	0.835933789308822	0.368929988181938	2.26583312847038	0.023461602197975	0.238067745561551
SERPINI1	13.963054668672	1.32984174187977	0.586895091718994	2.26589344610928	0.0234579079943272	0.238067745561551
PRSS30P	8.37300941825815	-3.02795858692715	1.33640484000124	-2.26574949169172	0.023466725437085	0.238067745561551
SMIM7	14.5516574530922	-1.52096518741818	0.671357533059028	-2.26550699518918	0.0234815852474306	0.238067745561551
DLAT	90.1041235433188	1.06053858250076	0.468442083119516	2.2639694867683	0.0235759915542685	0.238448139517187
KCNJ15	1734.21792662413	-1.04098393332748	0.459951093900637	-2.26324917394884	0.0236203334840406	0.238448139517187
C5orf34	26.3894388116199	-1.46243571858459	0.646058537189991	-2.26362726347584	0.0235970495546133	0.238448139517187
GLRX	1208.94577470693	-0.820885881321143	0.362712643718021	-2.26318518402495	0.0236242761545195	0.238448139517187
CARD11	421.38793953299	1.47483150685465	0.651363921897714	2.2642204415587	0.0235605599372211	0.238448139517187
PRPS1L1	49.4690985321003	-2.47375568752054	1.09252917902642	-2.26424679084999	0.0235589401851556	0.238448139517187
ATP5E	1939.38872586709	-0.991728733583063	0.438307256167127	-2.26263361974759	0.0236582838759922	0.238547841326669
ZNF436	26.3875702779115	0.965420945237893	0.426759680139705	2.26221217740592	0.0236842973066067	0.238547841326669
GRPEL2	94.507810956843	0.895353108205154	0.395782741127045	2.2622338347941	0.0236829599047292	0.238547841326669
EGFL7	27.8645989635979	2.23933400055587	0.990092499420118	2.26174221284113	0.0237133350234971	0.238671874086989
BABAM1	793.993782260549	-0.907506841343096	0.401603274147027	-2.25970976773177	0.0238392696818486	0.239545844843424
SLC6A12	24.6258450903746	1.6469682367397	0.728899035598422	2.2595286264682	0.0238505216873953	0.239545844843424
TOR3A	112.2994907059	0.81126584061129	0.359003758824988	2.25976976749922	0.0238355436738243	0.239545844843424
ARPC1A	276.349043696627	-0.680076035517289	0.301032681696942	-2.25914353113972	0.0238744580757006	0.239617627043881
STAG2	279.448766763562	-0.751333325022331	0.332744276638089	-2.25799022785153	0.0239462686851032	0.239632182459351
TDP2	520.293696515441	-0.923689003304484	0.409344238616329	-2.25650910936661	0.0240387654623051	0.239632182459351
SUMF2	427.132625261927	0.920407476485859	0.407494998418904	2.25869637678272	0.0239022780108389	0.239632182459351
DQX1	9.43708565390824	-2.31369623493086	1.02544467707012	-2.25628577208232	0.024052739862035	0.239632182459351
LIMD1	234.501676535589	1.12487956440405	0.498205906344785	2.25786075612194	0.0239543419456972	0.239632182459351
ILDR1	6.79100337871474	-2.18524441926141	0.96762932898202	-2.25834868147327	0.0239239294777836	0.239632182459351
FAM134B	48.2088584983985	1.20618495381773	0.534682036684726	2.25589204622737	0.0240773927723311	0.239632182459351
ZNF449	33.2399269349623	1.03275530062925	0.457783747232039	2.25598944233765	0.0240712923341449	0.239632182459351
SIX5	12.1715915864341	-1.96402700323377	0.870045145273955	-2.25738516432425	0.0239840179234637	0.239632182459351
TMEM186	15.2262481068091	1.14268845706375	0.506515838989128	2.2559777387105	0.0240720253239198	0.239632182459351
POLR1D	385.922406232099	-0.837706940413876	0.371054328176747	-2.25763958752381	0.0239681384608432	0.239632182459351
ISPD	23.7245285506217	-1.18796488304524	0.526561760855776	-2.25607890917589	0.0240656897296286	0.239632182459351
CD27	247.717150967493	1.52483159517163	0.676133518102449	2.25522260669909	0.0241193596270996	0.239882578813913
ARCN1	1776.23289880446	0.83277010923013	0.369333082468494	2.25479424606154	0.0241462466198549	0.239982751921009
AP3M1	511.392210849062	0.695819943999375	0.308723276036237	2.25386291870556	0.0242047930987185	0.24024987525454
MKL1	1050.40209948246	0.900620464224103	0.399595353608638	2.25383117218667	0.0242067909624459	0.24024987525454
BRAP	1086.23053961147	-1.02108313952432	0.453165176239824	-2.25322507787744	0.0242449609600647	0.240461489104964
XPOTP1	84.689520086997	-1.99265477429082	0.884536711593088	-2.25276661575975	0.0242738681747245	0.240581004576159
ZNF768	35.1647705358634	1.17603590067567	0.522107233075952	2.25247961754361	0.0242919793507683	0.240593427685056
RAPGEFL1	125.756537497102	-1.16766957652836	0.518626473250993	-2.25146543177571	0.0243560739475224	0.241060948251761
GGT6	64.9474161006811	-2.22870295794899	0.990342188273013	-2.25043725728323	0.0244212021725968	0.241370773827771
APRT	583.235124485161	1.13214832526778	0.503044700780305	2.25059189275153	0.0244113973805073	0.241370773827771
EPS8L1	71.1050559422261	-1.75491922001067	0.779905657148459	-2.25016859914456	0.024438244783584	0.241372061973226
TBL3	115.746484520507	1.08646953092104	0.482901938762695	2.24987610052844	0.0244568114586364	0.241388390828256
MAN2C1	67.5837095468053	0.625323123828676	0.27798929918796	2.24945034091355	0.0244838588693207	0.241488344010328
CEP57L1	278.35022096047	-1.20046833910169	0.533757731721629	-2.24908843049373	0.0245068704824444	0.241548380887739
ZNF767P	55.7511828930434	-0.8644314800176	0.384464608129923	-2.24840326453529	0.0245504872157164	0.241662289613923
TRIM11	79.8811741760251	0.755786894401319	0.336304616238091	2.2473283383843	0.0246190510880225	0.241662289613923
TMEM174	5.4191081321058	-2.65386250435294	1.18073018041914	-2.24764518461862	0.0245988239153213	0.241662289613923
PARM1	37.2532362504879	1.85575588254995	0.825702663193092	2.24748685607179	0.0246089296638988	0.241662289613923
TMEM119	8.97271706242129	-3.02741078130559	1.3466330246845	-2.24813347497911	0.0245676800994526	0.241662289613923
C3orf36	56.0623695268927	-2.09789929481537	0.933514461036024	-2.2473131187353	0.0246200230590418	0.241662289613923
TAF1C	244.597164205526	-1.60918138039171	0.716441855826166	-2.24607393789979	0.0246992723784658	0.24194098516504
SLC3A2	282.713385605059	0.948486277528807	0.422193475768602	2.24656782249439	0.0246676605358786	0.24194098516504
ZNF397	89.7987430893835	-0.681615868795263	0.303468575115322	-2.24608386069708	0.0246986369092923	0.24194098516504
TAF1L	83.0113271318931	-2.06732707351108	0.920527016977346	-2.24580814618498	0.0247162993058064	0.241941717210199
LCK	88.5185612032757	-1.67993456247559	0.748288406984516	-2.245036201009	0.0247658086741335	0.242260192869934
CAPZB	3092.38260474992	0.62493648581242	0.278594617395498	2.24317501771848	0.0248855306251119	0.24273850975241
MRPL9	257.657388168967	1.06120552068221	0.473032813176347	2.24340783793912	0.0248705269224929	0.24273850975241
TSPAN5	389.550474598528	-1.24241800392239	0.553967389100088	-2.24276379506867	0.0249120503181786	0.24273850975241
ZNF738	98.3184887072552	-1.04589032791123	0.466355096356364	-2.24269089387632	0.0249167542591985	0.24273850975241
BRICD5	236.260534515597	-2.0926443218143	0.932921833524764	-2.24310788601428	0.0248898582691233	0.24273850975241
RP11-694I15.7	89.0747256205738	-2.12082818090429	0.945201980303512	-2.2437830485959	0.0248463635963727	0.24273850975241
VN1R1	67.6099758453541	-2.07297957398842	0.924560379804836	-2.24212460242564	0.0249533203497359	0.242784419322311
FTMT	90.9871337673851	-2.16879371582036	0.967308499916989	-2.24209103507979	0.0249554892899265	0.242784419322311
LEO1	289.345760047957	0.89201279789826	0.397955116154724	2.24149096641202	0.0249942900314235	0.242996258398145
MUL1	262.961878488316	0.786751587095577	0.351060845636378	2.24106902514124	0.0250216042338699	0.243016135409094
DHODH	56.2070216059952	1.20826133073873	0.539240933897634	2.24067064420614	0.0250474169833785	0.243016135409094
HMG20A	293.606657229622	0.87340459389727	0.389771717776425	2.24081059262042	0.0250383465206856	0.243016135409094
ST6GAL1	1505.79572979674	1.23057121048135	0.549524729004466	2.2393372773427	0.0251339791263215	0.243194678027702
LPIN1	114.23463798725	1.29859979100645	0.579779593650863	2.23981631162489	0.0251028504724382	0.243194678027702
PDIA2	7.60831518475588	-2.47158004948976	1.10360783602669	-2.23954557842592	0.0251204391807358	0.243194678027702
HN1L	237.102979248942	0.90545697901328	0.404227090206309	2.23997104833116	0.0250928024905632	0.243194678027702
ATIC	639.073395113333	1.204365119236	0.53788947134282	2.23905687581009	0.0251522157070604	0.243206248354448
CCDC17	50.6939422462648	-1.78544644235009	0.797597782116821	-2.23852984848017	0.0251865231814005	0.243219066327802
TATDN1P1	71.892615502701	-1.84426843966917	0.82388107263072	-2.23851293704353	0.0251876247220075	0.243219066327802
LY9	58.9294858723914	1.59480998187297	0.713045185404392	2.23661840023293	0.0253112912739622	0.243926656890537
SOX21	104.764024173987	-1.86038627599182	0.831984582082594	-2.23608263428989	0.0253463587562126	0.243926656890537
NBAS	158.381528190481	0.762335497821368	0.340852526241691	2.23655522294945	0.0253154242310933	0.243926656890537
TMEM232	12.4112069602979	-1.60856797192968	0.719308010119349	-2.23627145715058	0.0253339949408098	0.243926656890537
OR1C1	33.5909005311548	-2.6646538852829	1.19110675705151	-2.23712431275181	0.0252782163396472	0.243926656890537
RPUSD2	64.2267548473211	1.34795538986328	0.602961856051094	2.23555665476301	0.0253808265798868	0.244093771528399
FASN	101.404750136476	1.21115321820105	0.541958846550386	2.23476971712916	0.0254324709152694	0.244425740675235
SLC25A30	323.861153915615	0.877310922865988	0.392694739161601	2.23407862488567	0.025477900173251	0.244533013633247
EIF1AXP1	9.23913758714533	-2.75060116810172	1.23116997832935	-2.23413599788568	0.0254741260627807	0.244533013633247
RP11-114H24.2	16.0834790873747	-2.42399278158982	1.08525214030649	-2.23357567477844	0.0255110059501736	0.244686207608117
STPG1	36.9970936901606	1.1175999897369	0.500489556901556	2.23301360503058	0.0255480472008306	0.244736517080958
NLRP1	546.025223228146	-0.826553688507878	0.370157942452318	-2.23297569419127	0.0255505472569106	0.244736517080958
RAB23	185.058085647017	-1.31437006402684	0.588845239059808	-2.23211461491215	0.0256073887411252	0.244990012649746
ATF6	1383.17539390206	-0.77794078096972	0.348531225230959	-2.23205476196345	0.0256113438111983	0.244990012649746
MFAP2	5.27917380815652	-2.43738746211086	1.09248157507633	-2.23105589853136	0.025677426530599	0.245457623204762
MESDC2	414.61689650756	0.840613643508727	0.376923297964627	2.2301981544999	0.0257342907338817	0.245507885931792
C11orf84	29.4322724907543	1.22707544498595	0.550171371387944	2.23035132106265	0.0257241285646854	0.245507885931792
FABP5P11	22.2842531450064	-2.46166379919997	1.10361614095254	-2.23054349048872	0.0257113835747408	0.245507885931792
ZNF669	140.597760768455	-0.827013682908382	0.370928617052151	-2.22957637909104	0.0257755794418832	0.24573752157285
NMRAL1	147.224302277928	0.88935370163592	0.399044231563281	2.22870957976719	0.0258332344463013	0.245884218835138
KIAA1919	1021.77827982743	-1.28378134940564	0.576056580113283	-2.22856815410942	0.0258426519235361	0.245884218835138
MROH5	7.59393349020046	-2.48422788447301	1.11451456099014	-2.2289775041306	0.0258154016079899	0.245884218835138
GPLD1	13.0647791707573	-1.90215478017023	0.853906275724941	-2.22759199018107	0.0259077352850143	0.245906716939975
UNK	106.128775354554	0.907295484076627	0.40721724503257	2.22803797025851	0.0258779830823391	0.245906716939975
CSRP1	195.404862406918	0.916156102782676	0.411285114189752	2.22754500752486	0.0259108713112106	0.245906716939975
BUB1	288.9472842717	-0.977147756310715	0.438674817227062	-2.22749909029981	0.0259139365385175	0.245906716939975
REPS1	125.426922775582	0.837331258401783	0.375983733103363	2.22704118470889	0.0259445214126928	0.246033361861762
DAZAP1	380.908994012908	1.0431671307336	0.468556061707608	2.2263443288555	0.0259911263734833	0.246148212078536
KCNA10	84.4586407589469	-2.17368962177163	0.976299172027682	-2.2264585324364	0.0259834836070409	0.246148212078536
AMN1	180.885834099612	-1.21171070938035	0.544368289652009	-2.22590244952538	0.0260207162662848	0.246265028217783
TRIM6	12.3493200560568	-1.39431295367791	0.626661200088526	-2.22498688841903	0.0260821183582946	0.246682566739284
DNM1L	552.465140885603	0.668595812888888	0.300692508097389	2.22352002422469	0.0261807546715498	0.246894079087348
DNAJC6	105.265610198685	-1.07172464709725	0.481927031509001	-2.22383177748192	0.0261597645181916	0.246894079087348
TERF1	27.732490389058	-1.22449158242007	0.550652103064782	-2.2237118057025	0.0261678404212992	0.246894079087348
TIGD5	194.232059291057	-1.55106679551553	0.697455311083424	-2.22389416334949	0.0261555658635071	0.246894079087348
TMEM17	14.2090914220038	-1.11185333463361	0.50007610187221	-2.22336826429218	0.0261909778404039	0.246894079087348
NDUFV1	324.977752318647	1.07294450010676	0.482769882589078	2.2224760466676	0.0262511510602322	0.247297972232102
CASP8	43.8379140817191	-0.775672338892754	0.349184700863252	-2.22138122596764	0.026325151519244	0.247534786358378
PDCL	239.794255806059	0.60611097335643	0.272858952469043	2.22133438493353	0.026328321587165	0.247534786358378
KIAA0430	1209.19031666286	-0.618670629802764	0.278499775033309	-2.22144032155419	0.0263211525686352	0.247534786358378
C2orf76	12.0647529666728	-1.80441321789394	0.812512887134086	-2.22078104417335	0.0263657950875379	0.247723915397854
EVL	1384.1705543647	1.4230364688362	0.64086747202727	2.22048478187647	0.0263858775836317	0.24774950320631
ATP2A3	535.128018007117	0.890595570684361	0.401510011013112	2.21811547970414	0.0265469596201715	0.24792677409777
TPX2	108.110450864979	1.53106577110108	0.690147167162632	2.21846273367415	0.0265232978233068	0.24792677409777
LYZ	37189.074931383	0.890836347753783	0.401520959732472	2.21865465839526	0.0265102279409436	0.24792677409777
HECTD1	574.597747846438	-0.533465690924566	0.24039513790365	-2.21912013519332	0.0264785525428122	0.24792677409777
TMEM19	168.56209590251	0.788258417364385	0.355159253577343	2.21945059694953	0.0264560846830085	0.24792677409777
UBAP2L	673.691469917875	0.663202846770245	0.298792807607349	2.21960780140925	0.0264454022462579	0.24792677409777
TADA1	63.1106736665109	0.973279859863599	0.438604688055952	2.21903660942958	0.0264842340092175	0.24792677409777
WDR82	1051.52556212479	0.787147697846831	0.354889301438161	2.21800909370042	0.0265542123833156	0.24792677409777
MMRN2	25.3853629094759	-2.15693934977829	0.972510709879386	-2.2179080681238	0.0265611012889217	0.24792677409777
CTC-429P9.4	266.484199088254	0.47356186633688	0.213577697950918	2.21728144314819	0.0266038651636597	0.248163636350165
UBE3A	1789.58483754919	-1.25029011058674	0.564371179675189	-2.21536845893922	0.0267347844258935	0.249007492398885
PCSK7	697.009216736151	0.740907258417051	0.334465904505359	2.21519517665867	0.0267466708133051	0.249007492398885
KRTAP21-3	5.71482076767795	-3.07699895942777	1.38903547012486	-2.21520546134878	0.0267459652023066	0.249007492398885
EDF1	740.052844704425	0.812139414506006	0.366726961163501	2.21456151445577	0.0267901760658664	0.249164231579954
PPCDC	81.8433421175884	-1.04589932431062	0.472308402423926	-2.21444149403859	0.0267984231695087	0.249164231579954
MRPL2	89.6960287353994	1.13280211682697	0.511634309944266	2.21408551930454	0.0268228965737321	0.249229413997594
TUBAP2	97.9619934687368	-2.15249112473497	0.972331095249654	-2.21374296805997	0.0268464653263462	0.249286111345226
LIMA1	75.6083618562378	1.21076632047821	0.547313605089863	2.21219847125747	0.026952954441393	0.24937243369205
SHBG	119.624334529248	-2.17940176431317	0.98522389647273	-2.21208780269724	0.0269605987378667	0.24937243369205
RP11-756P10.3	97.706112918523	-1.97400178823289	0.891862211555622	-2.21334838796427	0.0268736360101013	0.24937243369205
ACSL5	407.765569662689	0.904261960451086	0.408683815338515	2.21261994361602	0.0269238588803189	0.24937243369205
INPP5B	352.479733910673	0.637485012203043	0.288117971449977	2.21258330049614	0.0269263873932724	0.24937243369205
SCAF8	373.783662750339	-0.519488514981021	0.234736347005339	-2.2130723324633	0.0268926592340611	0.24937243369205
SEC16A	822.496687725856	0.831039453820776	0.375823690480343	2.21124818597417	0.0270186552340587	0.249747569624667
POLR3H	180.450955931948	1.11696902000519	0.505270443325807	2.21063597675146	0.0270610553185847	0.249974882179921
CTBS	1374.13236581815	-0.992937499649886	0.44936813370756	-2.20963042362962	0.0271308220639503	0.249974882179921
PSPN	91.0944670803883	-1.81901931856329	0.823130819491714	-2.20987876469811	0.0271135773777158	0.249974882179921
CSH1	63.8171465940066	-2.79452467651994	1.2646686554033	-2.20968920561155	0.0271267394160303	0.249974882179921
PPAPDC2	52.1435214094761	-1.45353886675001	0.657653257063823	-2.21019032619031	0.027091956075497	0.249974882179921
WDR7	192.257842932017	0.696658961342054	0.315503977140127	2.20808297777065	0.0272384893825985	0.25000479101238
MDFIC	442.325347457833	1.25192840525823	0.566758437724963	2.20892768757642	0.0271796710253864	0.25000479101238
MRPS9	41.1636902413672	1.08947922691442	0.493521865836534	2.20756019607706	0.0272749464224371	0.25000479101238
WDTC1	253.216100441635	-0.691717476995566	0.313363957102168	-2.207393228603	0.0272865990414352	0.25000479101238
HOOK3	876.910921757104	-0.7682916482522	0.347992279541099	-2.20778360159413	0.0272593617229445	0.25000479101238
ZNF672	112.808636408328	0.63110607274681	0.285897544289805	2.20745538166315	0.0272822608928171	0.25000479101238
TNFRSF18	12.8088353129061	1.7382153797087	0.786876723064443	2.20900597102343	0.0271742255906325	0.25000479101238
ZNF512B	20.0391945481208	1.64156711815801	0.743314264147352	2.20844291215241	0.027213413217603	0.25000479101238
DBIL5P	124.327731055883	-2.01087676726353	0.911003804656644	-2.20731983443409	0.0272917225614692	0.25000479101238
RDH5	36.6808965884267	-1.42904456372363	0.647675785040349	-2.20641962650279	0.027354632084125	0.250420339387192
ABCB5	14.8048397453914	-1.55726182925997	0.70875710264639	-2.1971728021425	0.0280081072499075	0.250898951167646
BAIAP3	45.4539566164814	-1.69071742900064	0.767673051003772	-2.20239257687884	0.0276375897817754	0.250898951167646
NDUFS1	332.108158149896	0.561885570649061	0.255696941207865	2.19746692312711	0.0279871162752577	0.250898951167646
DAPK2	138.719999847161	-1.05743401290707	0.481385612999486	-2.19664648122378	0.0280457038582618	0.250898951167646
DAPP1	1220.98198023404	-0.713641709745355	0.323714370999547	-2.20454132926448	0.0274862967219682	0.250898951167646
COL9A3	73.1869650539543	-1.72414904671397	0.783231630447005	-2.20132714217627	0.0277128727237666	0.250898951167646
MRPS18A	197.827743627097	0.627780653447707	0.285794100809212	2.19661865542422	0.0280476927448117	0.250898951167646
HNRNPM	5008.97411828582	-1.19425950294534	0.543176193896067	-2.19865950747807	0.0279021422282968	0.250898951167646
POLE2	145.923233364882	-1.49075324470013	0.679358452213813	-2.1943544528551	0.028209937619805	0.250898951167646
MSLN	22.62059336523	-1.78312572965755	0.811532010692142	-2.19723400453021	0.0280037382092593	0.250898951167646
NFAT5	1068.65114281878	-0.640789460371002	0.292385346777499	-2.19159225123082	0.0284089619595653	0.250898951167646
CEACAM4	621.089978109227	-1.14463973594495	0.519019850642201	-2.20538720152736	0.0274269353675654	0.250898951167646
NOD1	99.2767422808935	0.749457192726137	0.340943636699588	2.19818501374905	0.0279359241861049	0.250898951167646
ENG	31.1444932879639	1.69126642987759	0.77059591217604	2.19475136469609	0.0281814379748145	0.250898951167646
ERBB2IP	723.484365121644	-0.568385779616937	0.259343684849752	-2.19163146365498	0.0284061281526139	0.250898951167646
HMGXB3	60.9274153706639	1.06951660807462	0.486274375573817	2.19940976082189	0.0278487992145697	0.250898951167646
FBXL5	4873.78323492666	-0.826420601246159	0.376223324299844	-2.19662245232705	0.0280474213488992	0.250898951167646
SLC25A35	29.2619088236153	1.10762415182947	0.505038727108227	2.19314696552391	0.0282967921528808	0.250898951167646
AP5S1	93.2843422847977	0.869903712506485	0.395206519061785	2.20113705252541	0.0277263229118177	0.250898951167646
CTIF	100.64714251313	1.02863792482368	0.467330235407925	2.20109431594084	0.0277293476025677	0.250898951167646
ARGLU1	301.542737374882	-0.784160431016095	0.357237711842995	-2.19506621227249	0.0281588484791295	0.250898951167646
PHLDA1	42.2510561197998	0.980415307734243	0.445230679646755	2.20203897115109	0.0276625557602931	0.250898951167646
SCAPER	35.5361294552316	0.923082795312905	0.41931024262827	2.20143154511788	0.027705487870895	0.250898951167646
FAM134C	241.186745118123	0.559973109579044	0.254913831732019	2.19671528129443	0.0280407868022841	0.250898951167646
MVB12A	19.4374565936633	0.843607373997902	0.384297542950134	2.19519325448138	0.0281497379502772	0.250898951167646
IL19	13.1677208859839	-2.20759944967192	1.00586397456051	-2.19472961106544	0.0281829993179151	0.250898951167646
RPS3	8673.43722846429	0.979216106346147	0.446560900658087	2.19279409572826	0.0283222175339824	0.250898951167646
UPF2	578.951035367101	-0.39013737852206	0.177890534888127	-2.19313174119923	0.0282978887073824	0.250898951167646
ZNF256	34.3716946507706	1.52799449413134	0.694258377732255	2.20090177251072	0.0277429784333625	0.250898951167646
TTC39B	148.473078394735	0.907649939771695	0.412423260935959	2.2007729091513	0.0277521043537916	0.250898951167646
PI4K2A	60.9378663784977	1.0159831377183	0.461698248364126	2.20053496264735	0.0277689621908955	0.250898951167646
UBE2Z	410.428096150824	0.659510287422065	0.3008361506722	2.19225743298613	0.0283609235072391	0.250898951167646
UBR1	193.879811752743	-0.697140437516128	0.31719744555093	-2.1978122689648	0.0279624867703103	0.250898951167646
VMA21	291.454969279565	0.577046684458712	0.261736771628156	2.20468328110392	0.0274763271387077	0.250898951167646
FAM207A	88.0292375719336	0.866413798193765	0.395290398677043	2.19184124151124	0.0283909720437166	0.250898951167646
ADCY9	35.5756736397185	1.47963669121209	0.672685241169665	2.19959737579391	0.0278354735409608	0.250898951167646
INTS8	516.470020617212	-0.726548171738646	0.330381568854654	-2.19911835353708	0.027869507820455	0.250898951167646
COPS2	511.985637312183	-0.497602241690965	0.226545171047158	-2.19648134361418	0.0280575090718682	0.250898951167646
FAM102A	141.735928464865	1.84731600888393	0.838201815707471	2.20390361159589	0.0275311235151546	0.250898951167646
STOX2	8.22471644755422	2.51825900915248	1.14443685775946	2.2004350804313	0.0277760411943038	0.250898951167646
PELI3	38.5862264280617	1.04589063289622	0.476788514448931	2.19361541060831	0.028263069593099	0.250898951167646
ACSF3	105.773717828934	1.01005279337931	0.459588843923593	2.19773131296293	0.0279682587437894	0.250898951167646
ZNF619	11.4595591619982	-2.24448836610602	1.02354698617456	-2.19285328023351	0.0283179517304843	0.250898951167646
MRPS11	160.204838321891	0.746904477722779	0.339489890330037	2.20007870336483	0.0278013115707511	0.250898951167646
GPR132	104.141724171589	0.71005294844467	0.322708717310797	2.20029057275458	0.027786285715022	0.250898951167646
FAM46C	8624.13283675673	-1.10805647432634	0.505502287919878	-2.19199101726314	0.0283801552523827	0.250898951167646
NPBWR1	90.8905049581631	-1.82965540362605	0.833735971868412	-2.19452616339171	0.0281976051617675	0.250898951167646
FOXO4	681.057520410634	-0.798644484419749	0.363711541611943	-2.19581836990989	0.0281049462821794	0.250898951167646
IFT140	13.3523723968182	1.37029784634565	0.623256049009691	2.198611386962	0.0279055666011575	0.250898951167646
ERAS	56.8225911332903	-2.36151167732148	1.07724472409447	-2.19217752893295	0.0283666903600177	0.250898951167646
OR6M1	63.5652095307116	-2.48690251514191	1.1298546149078	-2.20108187578174	0.027730228110908	0.250898951167646
RNF216P1	25.0318353797721	1.06621960880942	0.484392652511258	2.20114736109595	0.0277255933631648	0.250898951167646
HSD17B11	2766.04602189064	-0.697865288803145	0.317850309570188	-2.19557844617748	0.0281221303729086	0.250898951167646
RP11-706O15.1	33.0231522012085	1.61142829918876	0.732771806328058	2.19908610739771	0.0278718001800186	0.250898951167646
NANOGP2	101.112201057698	-2.0740292169874	0.943805193036797	-2.19751833565779	0.0279834484326276	0.250898951167646
CDK3	25.359307583531	-1.30989094262315	0.597434809441698	-2.19252531309188	0.0283415973745331	0.250898951167646
RHOQP1	36.0857431242198	-1.97159071277673	0.898788253379429	-2.19360979114222	0.0282634739235381	0.250898951167646
TCAF1	47.7015949817948	1.26069441871389	0.575329773721599	2.19125530486439	0.0284333224687585	0.250958799180038
SV2A	9.4675563738102	1.63681273497261	0.747093457376056	2.19090760173623	0.0284584795328298	0.251000888444639
OR8K3	102.785874889462	-2.26886035023146	1.03567666010064	-2.19070337069387	0.0284732650218519	0.251000888444639
TGOLN2	18.8946430404871	-1.24170486057982	0.567079279097469	-2.18964950113508	0.0285496660669999	0.251519033400138
SECISBP2L	303.418256725175	-1.2177074534415	0.556292727854696	-2.18896885123324	0.0285991040722702	0.251569216277708
ZBTB40	160.235983339259	0.866632827806576	0.395931901072908	2.18884314564739	0.0286082425741816	0.251569216277708
SLC29A3	55.0680243516634	1.09628642882436	0.50082295739933	2.18896999953267	0.0285990206051782	0.251569216277708
INTS6	195.035682087224	-0.634182151350231	0.289979476979757	-2.18698977581266	0.0287432703849855	0.252445510728931
KRTAP15-1	27.2192626146901	-2.31640600766805	1.0591496003319	-2.18704327220836	0.0287393652111787	0.252445510728931
XYLT2	195.171562028508	0.768159257450305	0.351424353773242	2.18584525859572	0.028826928317805	0.25262043520773
NSUN2	495.273473636093	0.804339535929038	0.368395195770912	2.18336054639871	0.0290092689991325	0.25262043520773
TCOF1	162.529821042674	1.09327057823041	0.500971361108442	2.18230155075423	0.029087284642509	0.25262043520773
CEP70	15.3418334649513	-1.34784932064074	0.617286477529423	-2.18350696103901	0.028998496895765	0.25262043520773
NCBP2	199.267226691251	0.943433780055308	0.432629098482392	2.18069885582074	0.0292056977363197	0.25262043520773
NEURL2	6.34523589704512	1.95358476681026	0.893640140733952	2.18609782367852	0.0288084491905761	0.25262043520773
TAS2R3	38.5853129018987	-1.99386850806246	0.913037535107334	-2.18377496148399	0.0289787883295262	0.25262043520773
RAB1A	339.175601874043	-1.00257655395835	0.459656120353087	-2.18114479404347	0.0291727085736485	0.25262043520773
RNF157	147.570083786072	1.32613392152064	0.60752326534758	2.18285289989994	0.029046644541468	0.25262043520773
EMP3	2693.98041347477	0.583192342202174	0.266750492977791	2.18628402778895	0.0287948319495699	0.25262043520773
MCL1	5614.34934708776	-0.733616009576727	0.336047125428603	-2.18307479536108	0.0290303023622064	0.25262043520773
CORIN	12.5682041066494	-2.977183123333	1.36336738237686	-2.1836983646643	0.0289844200292368	0.25262043520773
GFOD1	97.8882656987787	0.818278999837644	0.374441977931183	2.18532923140373	0.0288647155906328	0.25262043520773
VPS51	380.46125819565	1.02050689044436	0.467873877386496	2.18115808504809	0.0291717258375808	0.25262043520773
HPGD	112.830959983528	-1.56221448633474	0.715549044849854	-2.18323886752241	0.0290182238488863	0.25262043520773
GPS1	160.149809602774	-2.06685012492404	0.947297808051052	-2.18183775720576	0.0291215088839904	0.25262043520773
WBSCR28	8.44471083840851	-3.06420371455294	1.40332581893996	-2.18352977847124	0.0289968184684597	0.25262043520773
CTAGE10P	40.9514003366115	-2.01502749187151	0.922157974593317	-2.18512179842089	0.0288799173579483	0.25262043520773
PYCR1	26.6345941174751	2.11474492228271	0.969188688838959	2.18197441492644	0.0291114210415854	0.25262043520773
PNMAL2	41.8371324326516	-1.83181484479229	0.839395706498441	-2.18230189958172	0.0290872589148731	0.25262043520773
DNASE1	223.965613080809	-1.28716653935669	0.589932463896414	-2.18188795858962	0.0291178027529895	0.25262043520773
SMIM13	39.8370965891133	1.01692139138954	0.466131056351484	2.18162119329534	0.0291375014278567	0.25262043520773
RP11-113I24.1	60.4286118940228	-2.42051540403374	1.10924670910471	-2.1821253866846	0.0291002800576692	0.25262043520773
ALG11	189.543710052817	0.721168064176692	0.330687038964328	2.1808174473221	0.0291969215634763	0.25262043520773
RP11-463D19.2	348.542467329237	-0.876390844813299	0.400971304063223	-2.18566973729151	0.0288397764848572	0.25262043520773
ABHD17B	17.2642820830714	-1.48428865938117	0.680752475391339	-2.18036468913009	0.0292304394146082	0.252662276452256
MMP13	10.7931112713814	-2.32674558136617	1.06735532649532	-2.1799165878584	0.0292636451075938	0.252662276452256
ADRA2C	133.391930111785	-2.00939825258017	0.921687711637649	-2.18012915568754	0.0292478891283606	0.252662276452256
RNF186	33.9227369754052	-2.10098986294388	0.963997231811695	-2.17945632374417	0.0292977858903092	0.252742987090518
OR9G9	33.8626313553235	-2.32922367597226	1.06878795687576	-2.17931317525411	0.0293084111291205	0.252742987090518
EP300	1622.9237781669	-1.02625286514109	0.471012823508508	-2.17882149682608	0.0293449313593114	0.252752480603556
CALR	4546.56566282135	1.03929430713591	0.476997817189964	2.17882403164543	0.0293447429810484	0.252752480603556
SCMH1	81.1607554882245	0.940149978562199	0.431632854302467	2.17812423032883	0.0293967891097322	0.252893896428027
TSTD2	45.509196597801	0.968945539828333	0.444845135971914	2.17816372817328	0.0293938494343829	0.252893896428027
CD4	724.175981622886	1.75008947381539	0.804448589091586	2.17551438034301	0.0295915916801524	0.253223755021095
CCL24	7.48095803019202	-2.73941386339809	1.25963914818011	-2.17476081729908	0.0296480447477753	0.253223755021095
RQCD1	1672.39690884602	-0.98300495273238	0.451984291205413	-2.17486530363869	0.0296402116421224	0.253223755021095
ARFIP1	343.94501662587	-0.748703527150605	0.343956848184003	-2.1767367944658	0.0295002113210835	0.253223755021095
HPRT1	72.0505599128062	0.597647324035537	0.274742948682151	2.17529631570983	0.029607918447704	0.253223755021095
MFSD3	290.500618835987	-1.80641899120899	0.829874734575612	-2.1767369410671	0.0295002003766208	0.253223755021095
OR1A2	99.9023168554177	-2.27302989057793	1.04433109187921	-2.17654143236103	0.0295147991059034	0.253223755021095
METAP1D	8.12343184717727	1.85185011086753	0.851390749465724	2.17508836222336	0.0296234953972797	0.253223755021095
C3orf33	40.0900142074485	-1.48564211382116	0.682858495071224	-2.17562221828433	0.0295835205824669	0.253223755021095
DIO3	74.0489377399746	-1.88640066287972	0.867279022986681	-2.1750793145941	0.0296241732783348	0.253223755021095
LRRC10B	90.6725379882242	-2.11897534907754	0.973936377513306	-2.17568149008644	0.0295790852089479	0.253223755021095
ANKRD65	72.9907388213913	-1.97872326565183	0.909030905976357	-2.17673926446599	0.029500026924657	0.253223755021095
USP11	140.490983858189	1.27383350385454	0.585891924001291	2.17417829410418	0.0296917478365072	0.253445349953726
GGT5	9.18306479302534	2.8235451234391	1.29926492581894	2.17318659753659	0.0297662760898807	0.253475114770153
COL7A1	68.2630413332927	-2.32186056366039	1.06816127687201	-2.17369849846991	0.0297277855093431	0.253475114770153
ALG10	39.6235615386861	1.40520502524782	0.646521174757226	2.17348646898609	0.0297437231213586	0.253475114770153
CARD14	25.5091267180668	-2.45594078318857	1.13009249192655	-2.17322104228987	0.0297636847944615	0.253475114770153
SMARCD1	367.381791035437	-0.806543299902597	0.371248269324731	-2.17251733286092	0.0298166637091843	0.253551869427985
ROBO4	8.93638194943888	-2.45611611814875	1.13062159293272	-2.17235911068868	0.0298285866570618	0.253551869427985
SUPV3L1	67.2555841751754	0.896588164586917	0.412712143542511	2.17242981243794	0.0298232583683768	0.253551869427985
AK1	93.0189196933874	-1.55554755134668	0.716193198569528	-2.17196638344739	0.0298581986219771	0.253652506388605
GGCT	86.066626854614	0.913611499410006	0.422224782222359	2.16380358964545	0.0304794265375755	0.253773099554463
MNAT1	52.6845787787637	0.800550608541225	0.368864357189855	2.17031164149368	0.0299832453037516	0.253773099554463
MAPK9	415.228052792078	0.832296349852801	0.383813758674529	2.16849013627618	0.030121414298038	0.253773099554463
RAD18	25.7639082348524	-1.28468852868485	0.592492276080988	-2.16827894733474	0.0301374692299002	0.253773099554463
RRAGB	155.367086084526	-0.896158724724132	0.413980801905769	-2.16473498432451	0.0304079863097994	0.253773099554463
MAP4K1	526.705709147317	1.12222951730349	0.516838578916782	2.17133465473014	0.029905884522981	0.253773099554463
OGDH	741.253320382656	0.877845136064326	0.404854891549839	2.16829573851465	0.0301361924676393	0.253773099554463
LRRC59	1226.62500155097	1.11525886605958	0.51551857284398	2.16337281488618	0.0305125167345473	0.253773099554463
RPL22	155.152784162114	1.05192988321548	0.484831837566914	2.16967988013019	0.030031105282646	0.253773099554463
SEPT6	1063.67212915568	0.945253104904424	0.436451949016297	2.16576671735547	0.0303290178595269	0.253773099554463
SDCBP2	13.2465149120626	-1.55240978870133	0.715636214381882	-2.16927226082626	0.0300620198999219	0.253773099554463
DIS3L2	89.67871185402	0.890299772710731	0.410054005927284	2.17117686900152	0.0299178051566949	0.253773099554463
TACC1	1112.94842437136	0.461988464770086	0.21294624760667	2.16950742247132	0.0300441814605817	0.253773099554463
TMEM18	186.727712452597	0.892744213792539	0.411298023873274	2.1705531317301	0.0299649681961261	0.253773099554463
GPD1L	53.5812805656804	1.23390081538312	0.569430082292746	2.16690486462351	0.030242108956115	0.253773099554463
AHCTF1	365.957166181364	-0.700831451432097	0.323828844015862	-2.16420329560812	0.0304487504818801	0.253773099554463
KDM8	12.4360450029577	1.4869242081169	0.687245318880559	2.16360034367193	0.0304950351445487	0.253773099554463
UBN2	170.935285035463	-0.855369723333824	0.395227700702912	-2.16424537503963	0.0304455225739771	0.253773099554463
UBASH3A	72.2498930318302	1.59777521550003	0.738334613487865	2.16402588516364	0.0304623628474875	0.253773099554463
RDH13	38.7435009562598	-0.742850012279898	0.342592021889896	-2.16832256683034	0.0301341526013887	0.253773099554463
SNRNP48	628.046000886572	-1.02775141573027	0.474036492973203	-2.16808501236712	0.0301522189630145	0.253773099554463
TMEM81	149.702645045313	-1.48112093664478	0.68448358009828	-2.16385166819066	0.0304757352708839	0.253773099554463
PDE12	161.484299621488	0.986066392265411	0.454654515076938	2.16882568976258	0.0300959200856932	0.253773099554463
PRF1	618.033401122564	1.61285638969821	0.744420601238953	2.16659290059129	0.0302659092089043	0.253773099554463
VMO1	8.6306100477497	-2.28086051597813	1.05365150189552	-2.16472003492128	0.0304091318283685	0.253773099554463
MST1L	21.9617563020906	-2.57688987436856	1.19002400516877	-2.16540999440017	0.0303563013465523	0.253773099554463
TMEM120A	274.621642323301	-0.909011574432117	0.419110721353823	-2.16890556150843	0.0300898544353309	0.253773099554463
HBG2	6099.79345400519	-2.01331922713804	0.929644411398933	-2.16568744183423	0.0303350793222975	0.253773099554463
OR11L1	30.5523382590009	-2.60982775446333	1.20367649195296	-2.16821361213834	0.0301424376086007	0.253773099554463
NAP1L6	8.8714074562697	-1.39403764082728	0.643977903502167	-2.16472899651686	0.0304084451293396	0.253773099554463
ZNF254	195.391422189141	-0.731118359334935	0.337392467845183	-2.16696704583938	0.0302373669708067	0.253773099554463
RP3-337H4.6	11.5550586432581	-1.73553826753651	0.800861809202738	-2.16708831360587	0.0302281208396183	0.253773099554463
MED15P9	14.7513077420436	-1.47575364832458	0.681416842262141	-2.16571349106288	0.0303330874649385	0.253773099554463
RP11-210H10__A.1	128.238759528264	-2.01263780592395	0.929403467399483	-2.16551570606403	0.0303482139310907	0.253773099554463
UQCRFS1P1	395.316483054468	0.870732654369408	0.402411332669193	2.16378760656128	0.0304806537360096	0.253773099554463
C1orf210	8.88899362041935	-1.84908267091301	0.85407145287781	-2.16502104675491	0.0303860735233195	0.253773099554463
HIST4H4	12.4362176531689	-1.71754833619136	0.794071207786545	-2.16296513379321	0.0305438613940242	0.253885841476711
POP5	178.949928851976	-1.09981356316853	0.50855179273847	-2.16263825803505	0.0305690132887325	0.253947006785093
ZSWIM4	21.5885577674216	1.15458385210275	0.534074194016664	2.16184167862401	0.0306303816693328	0.254308788356438
TRAM2	233.793597981865	1.30638216625334	0.604530353259337	2.16098688710989	0.0306963523561425	0.254474740106441
LPXN	121.08012482671	1.17380229110798	0.543275681855887	2.16060156990306	0.0307261300543187	0.254474740106441
DDX39A	191.33585592994	1.10632499763015	0.512202853675317	2.15993524770841	0.0307776826336869	0.254474740106441
NUP85	70.6667248851641	0.692575962291042	0.320846884526635	2.1585871507303	0.0308822104993126	0.254474740106441
PRR12	257.633470063695	1.21652464874059	0.563691259568035	2.15813998903023	0.0309169494759379	0.254474740106441
PKDREJ	76.732160701439	-2.03811551551586	0.944183255719589	-2.15860163074228	0.030881086140431	0.254474740106441
PREB	292.141326260905	0.603869748816259	0.279456058641951	2.16087549416833	0.0307049583662439	0.254474740106441
TARS2	63.1082265207347	0.907840932642622	0.420480907425645	2.15905387524203	0.0308459874785315	0.254474740106441
GABRB1	7.24066491741506	-2.88279077683342	1.33411605210872	-2.16082459413995	0.0307088914967379	0.254474740106441
TRAPPC2L	274.555804497047	0.743301231115555	0.344194835759378	2.15953626810132	0.0308085867597703	0.254474740106441
NRG4	8.25672241457138	-1.67421383386915	0.77577107207591	-2.15812872396629	0.0309178250661833	0.254474740106441
FAM98B	104.294077732418	0.778445723651529	0.360674525787785	2.15830525305675	0.0309041065831708	0.254474740106441
EDC3	94.6129455773357	0.745817039396824	0.345346812163692	2.1596175587204	0.030802287998129	0.254474740106441
AC024937.6	235.265547984727	-1.82387631908789	0.844784773415276	-2.15898341978202	0.0308514532683005	0.254474740106441
THTPA	94.1409255686051	-1.10035717315056	0.50953161129103	-2.15954643199177	0.0308077991554821	0.254474740106441
CLDN3	87.8011799527197	-1.7816395919144	0.826312865676626	-2.15613197605909	0.0310733612923931	0.25560749992221
ZNF586	337.580551069292	-0.79924217432024	0.370918690850769	-2.15476381760928	0.0311803209820279	0.255673824809477
C14orf166	686.108110877565	0.540157039252462	0.250648679642974	2.15503644392568	0.0311589824719543	0.255673824809477
PRPS1	402.931272879629	0.942966705437925	0.437593743313663	2.15489074020424	0.0311703851684673	0.255673824809477
CALML6	84.2580632980521	-2.20381956714497	1.02255373896002	-2.15521148980039	0.0311452882077152	0.255673824809477
FOXE1	97.7223433289308	-1.98616498785385	0.92180223601274	-2.15465412239073	0.0311889103834992	0.255673824809477
NEU1	103.454691363779	-1.59868324802073	0.741887867047431	-2.15488528526983	0.0311708121382944	0.255673824809477
FOXL1	106.296945404238	-1.92527366723364	0.893724157165821	-2.15421464419074	0.0312233429574931	0.255809156538084
MEOX1	13.0527099291425	1.94766988894548	0.90487334887409	2.15242264717921	0.0313640815850544	0.255941036713192
STEAP3	44.2319245276887	1.11763020415675	0.519113422039155	2.15295955894673	0.0313218569857495	0.255941036713192
BAZ2B	782.023708659805	-0.745881429424523	0.34653294016439	-2.15241133806988	0.0313649714974336	0.255941036713192
SAMD10	8.2160787787261	2.46402848236446	1.14438510686847	2.15314623335766	0.0313071876949536	0.255941036713192
PCNT	62.0249333085196	1.1316212728399	0.525674304747417	2.15270417941322	0.0313419348300621	0.255941036713192
RPSA	363.894273213301	-1.11179874402791	0.516272151618784	-2.15351291085881	0.031278390520792	0.255941036713192
GPBAR1	103.133970016884	1.17210940066464	0.54450334183493	2.15262113307649	0.031348466281027	0.255941036713192
CDC27	2699.30779927851	-1.29090599664521	0.600523439886383	-2.14963465354399	0.0315841250695521	0.256114250489271
KARS	275.601659632887	0.826075491090264	0.383973751446618	2.15138531729847	0.0314457991281054	0.256114250489271
SPTB	313.693681875896	-1.04017371870885	0.483655216101215	-2.15065129886074	0.0315037330449217	0.256114250489271
MBNL3	1046.86381871535	-1.16542521937571	0.542128773741092	-2.14972028017146	0.0315773472981512	0.256114250489271
PGS1	470.699170228853	-1.37105298567074	0.637487490837704	-2.15071355183626	0.0314988160501055	0.256114250489271
SLC17A3	39.5372501761785	-2.31010666336765	1.07367172746566	-2.15159494682841	0.0314292704723089	0.256114250489271
GFER	58.1733394999564	0.866188886507161	0.402741445340563	2.15073193118901	0.0314973644994631	0.256114250489271
NUP210L	8.53321005094201	-2.49262959901658	1.15915763029334	-2.15038018460508	0.0315251544363103	0.256114250489271
TTLL6	9.63129490387071	-2.33480765447482	1.08616624455847	-2.14958590931348	0.0315879839739507	0.256114250489271
PTCH1	46.0258935248958	1.92337614106673	0.894837157460528	2.14941470079887	0.0316015411373042	0.256114250489271
B3GALTL	29.5663740389609	1.26226801452892	0.586819161764102	2.15103407791641	0.0314735100069909	0.256114250489271
COLGALT2	5.83365943564823	2.47229302193638	1.14983529902564	2.15012795661378	0.0315450947955174	0.256114250489271
FBXO44	46.0094297681389	0.751330952644314	0.349590325616426	2.14917547080145	0.0316204929464152	0.256122403706718
ENTPD1	538.615102486759	-0.699072439153209	0.325606915759218	-2.1469827737632	0.0317946530484897	0.257387004145232
HMG20B	228.011739159784	0.69472030141411	0.323686067128691	2.14627805137471	0.0318508016406488	0.257403533983771
COA1	263.442181681884	-0.705505051832527	0.328666645221275	-2.14656723488793	0.031827750735009	0.257403533983771
GSDMC	7.79152899875459	-1.55013911840773	0.722217374522071	-2.14636087844542	0.0318441980075008	0.257403533983771
OR4K1	54.8117271575252	-2.51473996876484	1.17210184854816	-2.14549612039241	0.0319132012818408	0.257761861173985
FKBP4	257.584315710545	0.778217869533087	0.363358669157683	2.14173469794214	0.0322148369015292	0.257889718356527
FBXL3	690.985671278623	-0.50174624400594	0.234077816065127	-2.14350190223212	0.032072818504701	0.257889718356527
VASH1	43.5466753384273	1.50052929694155	0.700231058189684	2.14290594424773	0.0321206515794618	0.257889718356527
PSMC6	1417.07826858389	-0.996489231791297	0.46526407300343	-2.14177128562418	0.0322118911400925	0.257889718356527
CD99L2	357.975598007857	-0.688041263385283	0.32117169358691	-2.14228488102765	0.0321705647064655	0.257889718356527
BYSL	30.3248676197285	1.31396295486528	0.612961928452843	2.14362898227922	0.0320626266440414	0.257889718356527
HSDL2	779.84021751804	-0.86783850197521	0.405118385554635	-2.14218493388563	0.032178603386669	0.257889718356527
BEX1	14.9234798063097	2.19572397700462	1.02526722785214	2.14161139394312	0.0322247661001766	0.257889718356527
FLNB	137.687487271962	1.11966579735195	0.522303595650877	2.14370685301651	0.032056382757601	0.257889718356527
GAS2L3	59.8351897315082	-1.49819382547031	0.699196421438419	-2.14273668962458	0.0321342475203002	0.257889718356527
DDX19B	167.497360054115	0.684266145956939	0.319156572475695	2.14398262473209	0.032034279015223	0.257889718356527
AHCYL2	9.34301448624012	1.72080135392803	0.803561080917851	2.14146926075922	0.0322362147945659	0.257889718356527
C6orf141	222.803535994883	-1.6194673715626	0.755679115291706	-2.14306223209233	0.0321081016164961	0.257889718356527
MIB2	39.9693860454932	-0.918208049029406	0.428302001287006	-2.14383319776765	0.0320462543108029	0.257889718356527
SAP25	194.850047843826	-1.2693399759615	0.592043013913915	-2.14399958470934	0.0320329200602424	0.257889718356527
STMND1	5.44973203031856	-1.79124513488667	0.835368126758247	-2.14425841435658	0.032012186903647	0.257889718356527
RP11-554D14.2	21.2830338339759	-1.87885128664949	0.876668083399207	-2.14317290914071	0.0320992167567591	0.257889718356527
CCDC50	140.07818835611	1.00956803750126	0.471538574528714	2.14100837563562	0.0322733626359168	0.257897778017808
LRG1	591.784735515248	-1.2138830511364	0.566963007456141	-2.14102690153079	0.032271868721388	0.257897778017808
PABPC4	768.13635813391	0.828771272196377	0.38733790002146	2.13965964123433	0.0323822828938761	0.258623358400335
GNB5	236.469284500256	1.43770362514382	0.672451091221381	2.13800474698093	0.0325163579640858	0.259492818973584
SEPT1	170.152984472896	1.32409990016553	0.619420377521288	2.13764342959483	0.0325456940837105	0.259492818973584
PCMTD2	591.222469526746	-0.549721204734324	0.257144308637047	-2.13779261788073	0.0325335784259221	0.259492818973584
LRRC37A17P	45.6977248279353	-2.01237353579071	0.941550763888132	-2.1372969073708	0.0325738502465674	0.2595723007923
CDCA8	30.264789711574	1.08182175565859	0.506474949385342	2.13598275091687	0.0326808198038956	0.260134222108867
MORN4	15.3962458235637	-1.4065378435705	0.658453648024223	-2.13612278979849	0.0326694066328742	0.260134222108867
TXLNG	156.855652278625	0.816892099412092	0.382647301595337	2.13484348643332	0.0327737968260927	0.260294484300615
ECHS1	270.006425839699	1.08019485173311	0.506036370987972	2.13461899907345	0.0327921442525578	0.260294484300615
HTRA3	24.6713828672296	1.76485140204845	0.826535531030064	2.13523960651639	0.0327414432398171	0.260294484300615
C19orf71	11.544681406255	-1.33850020007793	0.626966750172808	-2.13488227200087	0.0327706277594876	0.260294484300615
CCDC159	114.770646380171	-0.627395304885841	0.293898714575767	-2.13473306881067	0.0327828201962916	0.260294484300615
PQLC3	202.958820468465	0.845198675221516	0.3961059609063	2.1337691391659	0.0328616832780785	0.260556635413743
RP11-815J4.6	30.551640499129	-2.59459567493117	1.21592265591284	-2.1338492726606	0.0328551210400185	0.260556635413743
CD74	1209.61648201988	1.31551803890634	0.617711411886345	2.12966445753214	0.0331993253394821	0.261126468313379
CTNS	67.2615016569159	0.952068253951696	0.447002370158299	2.12989531490523	0.0331802570339468	0.261126468313379
EPN3	29.5965658163285	-2.28427198344367	1.07409243552448	-2.12669962835019	0.0334450484252494	0.261126468313379
TBC1D22B	408.430891893005	-0.804398431565773	0.378255821032236	-2.12659894927888	0.0334534198826903	0.261126468313379
PRKCQ	123.473870198318	1.66402430266733	0.782118336271278	2.12758635809577	0.033371394284874	0.261126468313379
GEMIN5	83.9416268657602	1.31877195187895	0.62017940155907	2.12643623532753	0.0334669533256108	0.261126468313379
ZNF446	10.4677875772204	1.29173128602288	0.605953403928007	2.13173369049405	0.0330287455305682	0.261126468313379
PRODH	37.1437737182095	-2.01641014304923	0.947307603649027	-2.12856957474217	0.0332898879812075	0.261126468313379
FLT1	7.9601035974384	-1.71114254076466	0.804479592602444	-2.12701795856525	0.0334185910818047	0.261126468313379
SELK	280.46119964721	-0.785403236683425	0.368946805646566	-2.12877093570992	0.0332732166711326	0.261126468313379
C3orf52	6.31963090484182	1.97059305201029	0.926565981691096	2.12677034442136	0.033439169460643	0.261126468313379
EXOSC2	279.791641174182	0.893149391960048	0.419770186761811	2.12771039994521	0.0333611021104544	0.261126468313379
AAR2	219.827281379136	1.07467768475795	0.504158439014027	2.13162688868141	0.0330375314741069	0.261126468313379
TTYH2	103.985623160122	1.38947499238357	0.65289429946851	2.12817755265236	0.0333223652312783	0.261126468313379
CHMP7	410.740078737656	0.94106405008133	0.441610886694071	2.13098018739121	0.033090774446762	0.261126468313379
CCDC144B	9.35951308597176	-3.08983500082991	1.45191729270178	-2.12810675674248	0.033328233240089	0.261126468313379
HPS6	269.423163448769	-1.01177547788721	0.474620714969589	-2.13175583360713	0.0330269242000127	0.261126468313379
KIR3DL1	23.6304745632758	2.54156753838447	1.19405763229103	2.12851328918519	0.0332945493181266	0.261126468313379
ATPAF2	60.5212891491999	0.876980965165143	0.411336650009662	2.13202729478286	0.0330046027752826	0.261126468313379
MUC1	23.4386727376429	-1.7481763582129	0.821895027798707	-2.12700685499347	0.0334195136302371	0.261126468313379
FOXE3	93.5023101293838	-1.83610153420636	0.861622101537968	-2.13098240043863	0.0330905921212207	0.261126468313379
C11orf96	37.2523761701246	-2.15779923518905	1.01332802904971	-2.12941828640882	0.033219668857702	0.261126468313379
NBR2	64.9042296525455	0.764598983865381	0.359005056244406	2.12977218723307	0.0331904259390835	0.261126468313379
MTOR	260.423100979424	0.731076751741838	0.343207696346845	2.13012924687742	0.0331609443350596	0.261126468313379
IFIT1B	423.310167469075	-1.50523349643069	0.706284613425274	-2.13119961530911	0.0330727007013232	0.261126468313379
STK38L	467.890280324061	-0.581582376331344	0.272862134077032	-2.13141474649303	0.0330549890709982	0.261126468313379
SLC25A5P3	60.583311098341	-2.20134336135811	1.03430701051115	-2.12832683041587	0.0333099950516151	0.261126468313379
SH3D21	18.443425547784	-1.41972881074674	0.667714882822808	-2.12625006162024	0.0334824437369313	0.261126468313379
UBE2SP1	115.793278030256	-1.88212568827963	0.884089780857566	-2.12888524336744	0.033263755958651	0.261126468313379
PAGE2B	6.91709278866688	-1.91542523202293	0.90049827144387	-2.12707263607704	0.0334140484783077	0.261126468313379
ARL6IP5	2856.77694416404	0.527474104450804	0.248110621472605	2.1259634163185	0.0335063057860917	0.261169850452813
TRMU	48.3150271115537	0.668077613683677	0.314579678769381	2.12371509913533	0.0336939740309277	0.261385844676573
GTF3C2	246.833773680995	0.836976050070807	0.393936036606988	2.12464961895786	0.0336158602677419	0.261385844676573
ZMIZ2	174.758304815908	0.614832045575142	0.289524542629975	2.12359214866605	0.0337042626452473	0.261385844676573
GLIS2	19.0017622597155	-1.82172425286771	0.858082026132236	-2.12301877604761	0.0337522785090167	0.261385844676573
C6orf203	67.6678960831438	0.773656202331564	0.364528867867308	2.12234549998159	0.0338087352349323	0.261385844676573
ZFC3H1	271.167943360005	-0.584672113690914	0.275257179534888	-2.12409396433857	0.0336622871128767	0.261385844676573
SLC39A5	11.6556673478785	-2.53900934402926	1.19571924897792	-2.12341596591304	0.0337190104720555	0.261385844676573
RFWD2	1543.45571364173	-0.829233745571382	0.39052230812286	-2.1233966109575	0.0337206309643705	0.261385844676573
ZNF148	140.18504631352	-1.02712244230993	0.483685715366348	-2.12353271903426	0.0337092367375201	0.261385844676573
IL7R	2552.80896433792	1.51548824180488	0.713833095838005	2.12302882934528	0.0337514361135323	0.261385844676573
TRAPPC12	384.414448513023	0.60164054121153	0.283461813309886	2.12247474954874	0.0337978909148805	0.261385844676573
SLC35E3	152.201959339289	-0.737420406657462	0.346959652628997	-2.12537798291487	0.0335550859215555	0.261385844676573
RUFY2	135.048116580554	-0.871004595902819	0.410385082257527	-2.12240803469616	0.0338034880647819	0.261385844676573
AC005740.3	60.774321527965	-2.94689156045644	1.38793176310104	-2.12322510284817	0.0337349933790748	0.261385844676573
RP11-118D22.3	58.6889196112269	-2.47365592120341	1.16521709700867	-2.12291419989782	0.033761042319583	0.261385844676573
TFEB	457.759392420278	-0.614805533127332	0.289759845441311	-2.12177616326019	0.0338565392505498	0.261472147285632
SUSD3	354.001437586482	1.0498382541248	0.494767570627872	2.12188170051754	0.0338476735170105	0.261472147285632
PHF21A	613.027653034208	-0.815685783201093	0.384702072781465	-2.1203051423756	0.0339803202852439	0.261578819369472
CARM1	614.833343941486	-0.872603511312344	0.411523809942885	-2.12042047198546	0.0339706017624242	0.261578819369472
MBOAT2	301.029216318102	-1.02484692548438	0.483291183523727	-2.12055787571399	0.0339590262137828	0.261578819369472
CYP17A1	9.06554341779767	-1.41654349114235	0.667870546805465	-2.12098511892449	0.0339230547398809	0.261578819369472
ZNF30	13.7083337518492	1.58450713212407	0.746931582944944	2.12135511244122	0.0338919296942569	0.261578819369472
ADH5	438.25858559961	0.830315609359166	0.391506468388704	2.12082219937882	0.0339367678042167	0.261578819369472
PSMB5	208.567447763974	0.61182920801828	0.288711734005533	2.11916987068685	0.0340761135676289	0.261892457101346
SUV420H2	48.1408447955644	-1.34433396290229	0.634345341267648	-2.11924621408243	0.0340696645435686	0.261892457101346
PSMA5	406.426099028914	0.839041377065697	0.395887292182639	2.11939456919626	0.0340571353925985	0.261892457101346
KRT16	15.7045536900288	-2.20726533336553	1.04172065956445	-2.11886489252157	0.0341018866728237	0.261949476100398
PIP4K2A	1622.00097385085	-0.999090612595481	0.471639884096361	-2.11833359790954	0.0341468251328917	0.26215357089652
PHLPP1	88.2650892093338	-0.63347548104408	0.299095184651994	-2.11797285128862	0.0341773669853761	0.262246979363058
WIPI1	710.299612602052	-1.19428563936715	0.564057404847847	-2.11731222585279	0.0342333579743429	0.262448452053227
CAPS	89.7251491488671	-1.96906128693933	0.930172153307052	-2.11687834336763	0.0342701741085463	0.262448452053227
SLAMF1	34.5531306331806	1.23402187799463	0.583071772332576	2.11641505651684	0.0343095226324691	0.262448452053227
HFM1	6.4194945799232	-1.89787894181898	0.896947761101987	-2.1159302961939	0.0343507362973254	0.262448452053227
GPR25	30.5567956036967	-1.52909153655121	0.722417497965896	-2.11663136739719	0.0342911458134481	0.262448452053227
ZNF438	151.840845767712	-0.935267101494672	0.441789683560815	-2.11699624571683	0.0342601664202464	0.262448452053227
SHPK	52.2968413227567	1.006895364567	0.475843130917707	2.11602374636597	0.0343427880006857	0.262448452053227
CTAGE1	38.9030795231038	-2.42626343949408	1.146660814139	-2.11593821780323	0.0343500624730083	0.262448452053227
GRIN2D	12.9988433000148	-1.40205657887741	0.663261365971298	-2.11388247651694	0.0345253062744976	0.262468919991082
ELAC1	54.709963833158	0.999433877284176	0.472573740306894	2.11487391710579	0.0344406947707375	0.262468919991082
CEP170P1	20.5261307054134	-1.91028892966589	0.90349925290964	-2.11432264444489	0.034487719578205	0.262468919991082
PAPD4	863.827425265585	-0.839365730807257	0.397006159278959	-2.11423856076114	0.0344948969261875	0.262468919991082
CCL19	13.9646716557965	-2.86669156731219	1.35604943109751	-2.11400226390866	0.0345150739588496	0.262468919991082
CHRNA7	7.56224109793888	-2.16280857861035	1.02317637774178	-2.11381793565623	0.034530820470309	0.262468919991082
TBC1D9B	350.838862081524	0.886188368218162	0.419250987865501	2.11374187269049	0.034537320049275	0.262468919991082
CFD	921.657110770252	-1.78149324154743	0.842577210106434	-2.11433827093708	0.03448638584798	0.262468919991082
C19orf73	106.380942698513	-1.77937019750364	0.841045466922414	-2.11566469053662	0.0343733356634539	0.262468919991082
POLR2J4	55.3873557833368	-1.35680290837023	0.641497349471328	-2.11505614089972	0.0344251627199165	0.262468919991082
SOX6	232.252648287545	-1.23815140939945	0.585920530896579	-2.11317293747128	0.0345859687046728	0.262698746861677
CUL1	377.739317564525	1.14269120185982	0.541749707576386	2.1092603943837	0.0349221114122866	0.262735041684847
HSPB11	230.676650297871	-0.831409739135559	0.393982318783344	-2.11027170382425	0.034834959418497	0.262735041684847
ERH	1230.56424241802	0.591196704449262	0.280242139564418	2.10959245946438	0.0348934744086852	0.262735041684847
DCAF4	58.8895691214208	1.2914235146112	0.611489834711709	2.11192965328696	0.0346924835188496	0.262735041684847
MKRN1	4578.2005322424	-0.907433868025186	0.429970568836891	-2.11045577021673	0.034819117054426	0.262735041684847
POLG	342.266166657072	0.550715890818849	0.260933447266581	2.11056074484853	0.0348100847745327	0.262735041684847
WWC2	38.332867764016	1.12182088473987	0.531518898290922	2.11059454018858	0.0348071773647386	0.262735041684847
ANKLE1	10.2503516427244	-1.5699381793725	0.744292992284287	-2.10930130425419	0.0349185822971743	0.262735041684847
VCP	2510.76663350841	0.936610441522763	0.443998044458687	2.10949226739198	0.0349021127727883	0.262735041684847
SUMO4	113.232178711723	-1.37956342788506	0.653052626352496	-2.11248431170143	0.0346449301812396	0.262735041684847
CD28	273.233752052565	1.60417400184461	0.760416174320511	2.10960005325775	0.0348928197611372	0.262735041684847
C14orf80	26.1831216327501	0.920336460826033	0.436125729319426	2.11025490805648	0.0348364053156173	0.262735041684847
LMLN	48.309385283558	1.13181313116853	0.535888770959198	2.11202994446529	0.0346838809827799	0.262735041684847
TAL2	35.45426035928	-1.96209447062132	0.929501776226683	-2.11090986677449	0.034780059842071	0.262735041684847
OR52K1	102.095977823859	-1.68724844684906	0.799843011420174	-2.10947451282126	0.034903643727521	0.262735041684847
EXOC3-AS1	160.595404793957	-1.60998584799768	0.762104822089633	-2.11255171379604	0.0346391552949525	0.262735041684847
SIGLEC14	773.475587530777	1.03726613507136	0.491270164374649	2.11139655995948	0.034738240513002	0.262735041684847
RP11-2H8.4	59.4012824310029	-1.67290852291863	0.792068026099277	-2.11207682647822	0.0346798602748929	0.262735041684847
LARS2	54.4951994985129	0.993596458612898	0.471204468474655	2.10863123142548	0.0349764249104797	0.262894484050628
SLMAP	232.50603469488	-0.943939003466471	0.447707748750453	-2.10838209993236	0.0349979515091624	0.262894484050628
SNX33P1	66.0632904557264	-1.98756633337182	0.942700578258476	-2.10837500178859	0.0349985650011346	0.262894484050628
TGFBR3	150.248271490758	1.36905147513738	0.649722925452048	2.1071312424213	0.0351062048667412	0.263233422545692
RUSC2	41.9933429257765	1.2519477438401	0.594117732769804	2.10723847275769	0.0350969136098915	0.263233422545692
KIAA0040	564.818495248983	-0.697296211153232	0.330965969328022	-2.10685168801188	0.0351304374727476	0.263233422545692
RP11-290L1.4	34.1562809838379	-1.621242705113	0.769532689983955	-2.10678860848237	0.0351359073675408	0.263233422545692
RP11-266L9.1	43.9920012323794	-1.20903202886547	0.573728863400417	-2.10732299870656	0.0350895911144792	0.263233422545692
AGMAT	48.414917167216	1.09533335485391	0.520214585430254	2.10554141604467	0.0352442061156975	0.26363215411718
KIAA0319	40.0775610434791	-1.64361122242966	0.780613601219248	-2.10553751543976	0.0352445452673473	0.26363215411718
RP3-467N11.2	52.986830896851	-2.02211783797765	0.960234422103506	-2.10585851895203	0.0352166438173975	0.26363215411718
OR8D2	39.6964643940588	-2.38678990927062	1.13376815757045	-2.10518340397323	0.0352753463263752	0.263706823521132
AK4P6	86.2975895766531	-2.10674110894406	1.00082808088474	-2.10499800033756	0.0352914821276179	0.263706823521132
PPIAP23	24.5181387223987	-2.58579064484602	1.22899703498305	-2.10398444523643	0.0353798038843019	0.264228446382395
WDR24	44.0909519267657	1.16607256351629	0.554353488809792	2.10348196061662	0.0354236605632593	0.264417616924078
SLC35C2	448.803330836023	0.636839204551489	0.303069955453271	2.10129441435075	0.0356151297808336	0.264764080332746
RBL1	774.8172308872	-1.19705477663355	0.569300705136512	-2.10267573153015	0.0354941248740822	0.264764080332746
NKG7	3152.25301353594	1.12992827658833	0.537683884110622	2.1014732075471	0.0355994474994348	0.264764080332746
ATXN3L	40.7290790089716	-2.14993087613646	1.02316458118431	-2.10125615729186	0.0356184861434187	0.264764080332746
ADAMTS1	34.049609903231	-1.86035168033458	0.885037104042689	-2.10200416664661	0.0355529108144501	0.264764080332746
TPPP2	8.27718674544438	-2.69870842832818	1.28419860985266	-2.10147278436768	0.0355994846103264	0.264764080332746
OR6C75	77.1883600258342	-2.50857830580545	1.19354372458187	-2.10179003428154	0.0355716725095305	0.264764080332746
KCTD11	105.662375140918	-1.2241096678619	0.582322108678914	-2.10211779634983	0.0355429583181081	0.264764080332746
ADRB1	59.5233109502514	-1.68986220536218	0.804444119521385	-2.10065828608156	0.035670973559012	0.264957703840011
OGFOD1	261.277432399494	0.976203780419466	0.464775057298886	2.10037902225827	0.0356955128681992	0.264957703840011
TMEM104	161.235751466379	0.889905985009609	0.423699106983181	2.10032537322514	0.0357002287334881	0.264957703840011
DRG2	73.255892466046	0.694889508730423	0.330911756159462	2.0999239096104	0.0357355351183364	0.265081890441215
BTN2A1	810.508606271619	-0.857185487600149	0.408283628796692	-2.09948532623381	0.0357741400050636	0.265126651577123
ZNF549	22.8401594513741	0.982276883308515	0.467877159169596	2.09943328939565	0.0357787227394576	0.265126651577123
NUCB1	2782.93094864213	1.19843047363024	0.571319669798943	2.0976530950737	0.0359358011544078	0.265978441216061
NFKBID	100.597455308297	-1.45918569972647	0.695587550089191	-2.09777431976661	0.0359250860642829	0.265978441216061
PLA2G12AP1	90.8997238637477	-2.00624841661531	0.956496328347347	-2.09749724819304	0.0359495805146988	0.265978441216061
SLC22A18	6.75983950905982	-1.48040601736423	0.705959776488287	-2.09701185063026	0.035992526305032	0.266020370494779
KCTD5	422.642324335727	0.696530971265313	0.332128779103898	2.09717138377647	0.0359784067073431	0.266020370494779
MPG	162.58147703815	0.510455697973459	0.243458218268319	2.09668706854199	0.0360212859818044	0.266095131227905
RNF112	10.3736094610761	-2.36434646677882	1.12785414406675	-2.09632289708454	0.0360535569138489	0.266195739407373
FRY	637.993877216456	-0.86003589943379	0.410716996978466	-2.09398662767999	0.0362611714862972	0.26621383043891
VCPKMT	192.377774822658	-0.88512416800755	0.422362668728219	-2.0956496242264	0.0361132836756941	0.26621383043891
PPFIBP1	38.0723551099294	1.13113968895514	0.540056985388549	2.09448210014602	0.0362170559648551	0.26621383043891
LDHB	903.068289460165	1.06445318779195	0.508321649004967	2.09405440408766	0.0362551341563507	0.26621383043891
MRPS26	126.934557428273	0.662119377626323	0.316122732488254	2.0945009946443	0.0362153745560613	0.26621383043891
UHRF2	930.012046973497	-1.02064970048944	0.487100671955111	-2.09535679019449	0.036139287609278	0.26621383043891
ALAS2	11240.8796966628	-1.32243479223062	0.631314574671106	-2.09473192175163	0.0361948298825787	0.26621383043891
HSD11B1L	69.2206414463324	-1.97339205638581	0.942244421974974	-2.09435260147204	0.0362285817564505	0.26621383043891
DNASE1L2	21.603769339504	-1.50511928037851	0.718822340011106	-2.09386825728769	0.036271717639924	0.26621383043891
LRRC34	42.9091780797696	-1.57866792821167	0.753853358054603	-2.09413132056025	0.0362482836932784	0.26621383043891
GLRX5	2821.04909357613	-1.18825757749251	0.567443491530485	-2.09405446573648	0.0362551286652389	0.26621383043891
AC000089.3	45.1571804236812	-1.92840135581662	0.921015595347177	-2.09377709298148	0.0362798416622534	0.26621383043891
GABARAPL2	2223.26078145944	-0.79128580303205	0.378582717213837	-2.09012658806901	0.0366064298588708	0.266273004223109
NTHL1	27.2194121061233	1.12940171169309	0.540836190502436	2.08825099267835	0.0367751996610843	0.266273004223109
SART3	403.539997690884	0.926085242034185	0.443616237300526	2.08758193268479	0.0368355631760172	0.266273004223109
SLCO4A1	75.505347603025	-1.34097641436686	0.642772350019373	-2.08623848603077	0.0369570256682547	0.266273004223109
ADNP2	137.212766365418	0.85078226233597	0.408002640127765	2.08523714961636	0.0370477792976934	0.266273004223109
GBF1	517.622195851341	0.894758441872124	0.428965840044809	2.08585010353892	0.0369922032474961	0.266273004223109
GNB3	17.6121089053794	-2.03627457093077	0.973507260511438	-2.09168914658222	0.0364663320287799	0.266273004223109
MXI1	3491.69136425	-0.904160058461997	0.433730654456599	-2.08461184186941	0.0371045487034218	0.266273004223109
TCTN3	84.2228227821868	1.11610484529811	0.535122482953752	2.08569978061372	0.037005826334274	0.266273004223109
ACAT2	98.2091854018541	0.643048546835455	0.307396091527532	2.09192167551636	0.036445522762509	0.266273004223109
STX16	759.598299586741	-0.674383192187495	0.323155648950097	-2.08686802900863	0.0369000655935478	0.266273004223109
AKAP9	183.178436630417	-0.592693063017528	0.284324593402791	-2.08456488383291	0.0371088148402301	0.266273004223109
GSE1	172.488053216128	0.979272096361805	0.469396880889598	2.0862347753694	0.0369573616249991	0.266273004223109
VPS4A	306.778382588343	0.852874471412797	0.40763619197212	2.09224423201149	0.0364166735868594	0.266273004223109
KCTD1	11.5588646573357	1.59765514921736	0.766260569645562	2.08500242933857	0.0370690800179002	0.266273004223109
GLS2	5.68761959798167	2.05182953787663	0.982828421925514	2.08767826825437	0.0368268664507976	0.266273004223109
TXN	1612.80150771447	-0.880734601987746	0.422244002647169	-2.08584277447676	0.0369928673482026	0.266273004223109
SLC27A2	20.2311693730094	1.51253091134019	0.722737984683892	2.09277904772326	0.0363688830125579	0.266273004223109
EAF1	444.747238805941	0.612438177757211	0.293648647027417	2.08561552711676	0.0370134637156998	0.266273004223109
UTP23	158.782740916335	0.607173509909495	0.29064126840808	2.0890822326614	0.0367003214324251	0.266273004223109
TEX9	226.102196048803	-1.37820548620632	0.66025317604491	-2.08738940789673	0.0368529486556726	0.266273004223109
GRAP	53.4563767874976	1.20654221348761	0.577266932648947	2.0900941059469	0.0366093470402383	0.266273004223109
TSR2	199.094928153568	0.898118067096934	0.430748066229698	2.08501938257805	0.0370675411725797	0.266273004223109
GFI1	155.225424156913	1.36556397726427	0.654351508742905	2.08689665878161	0.036897476994352	0.266273004223109
DUSP19	11.9024314028904	1.45841835748996	0.698779369108294	2.08709418446488	0.0368796216596642	0.266273004223109
CACNB2	13.8335011855644	-1.57784307197062	0.755108783578939	-2.08955730125694	0.0366575855314188	0.266273004223109
C16orf92	19.1782654362404	-2.45491210108797	1.17571565041006	-2.08801515930468	0.0367964672506123	0.266273004223109
DDIT4	689.748539322635	-1.12469170567848	0.53739066031133	-2.09287542330361	0.0363602766773566	0.266273004223109
RNASEH1	175.699069095441	0.780855804790009	0.374045330833327	2.08759671735604	0.0368342283713419	0.266273004223109
ZDHHC24	105.186449497488	0.937108303490617	0.449315681057865	2.0856345393606	0.037011740183237	0.266273004223109
KLC2	18.919631469825	1.10691813172385	0.530330945331334	2.08722146325496	0.0368681201921543	0.266273004223109
SMCR8	535.169997369816	0.911930230017343	0.436414909976295	2.08959457885359	0.0366542339330298	0.266273004223109
PRR19	90.2175958491003	-1.72061510456815	0.822042901095637	-2.09309648228198	0.0363405426762734	0.266273004223109
HUS1B	101.727358308263	-1.71181092921554	0.819837885453179	-2.08798710036352	0.0367989983193199	0.266273004223109
ZFP62	7.5124722041183	1.51110208019123	0.724816123662952	2.08480748545532	0.0370867789809111	0.266273004223109
ZNF100	94.2172926943422	-0.902651642557831	0.432833966705693	-2.08544548716435	0.0370288815255798	0.266273004223109
TFDP1	485.581506993563	-0.686422539131808	0.329064325161717	-2.08598285090451	0.0369801765052609	0.266273004223109
PTTG3P	79.5861804848779	-2.26189926599106	1.08339701209493	-2.08778429397483	0.0368172969656218	0.266273004223109
RP3-352A20.1	87.4879977601693	-2.02017083999205	0.966986394764549	-2.08914091338787	0.036695040374729	0.266273004223109
RPL7AP4	54.6783970306329	-1.96252416875028	0.937698151339338	-2.09291675145904	0.0363565866066163	0.266273004223109
ARL5AP4	43.683952156994	-1.91286097407357	0.916356215016467	-2.08746439728048	0.0368461760922148	0.266273004223109
GLDCP1	60.5534020637508	-2.25074062286974	1.0788587124792	-2.08622370736346	0.0369583637182087	0.266273004223109
MSH5-SAPCD1	60.7649878396305	-1.90794005121464	0.912963531373782	-2.0898316150084	0.036632928312279	0.266273004223109
ZNF350	87.8936758561951	-0.554304826696467	0.265899277835954	-2.08464209157591	0.0371018007392557	0.266273004223109
RP11-203F10.6	61.5074996391729	-2.5091950869244	1.20395038432273	-2.08413496070764	0.0371478927675193	0.266419460089465
FKBP8	1655.49543029248	-1.45319720710346	0.697345215894811	-2.08389929977331	0.0371693280656501	0.266425169993513
MPHOSPH10	146.522092149074	0.894952753162786	0.429540739828396	2.08351075970192	0.0372046919700863	0.266425169993513
AMIGO3	99.8056603641352	-1.34921134763902	0.647537211475934	-2.08360434539933	0.0371961714261803	0.266425169993513
DGKZ	10.4308948097065	1.82827662898951	0.877725562932609	2.08297069858712	0.0372538944992954	0.266643722313914
U47924.6	52.2238180122062	-1.65742068871149	0.795953399131917	-2.08230870113641	0.0373142816504822	0.266942069030417
ARL10	48.9088938090441	0.854324071066454	0.410427441379933	2.08154715043921	0.0373838530481207	0.26730578692524
UTS2R	139.285854509668	-1.68078634820393	0.807723203409029	-2.08089397594387	0.0374436116715085	0.26746507796585
SF3A3	456.29542506271	0.81855912096633	0.393350431929675	2.08099204811011	0.0374346339121464	0.26746507796585
SPEG	29.9745012291539	-1.81015174964125	0.87187527071218	-2.07615906821472	0.0378792415655169	0.268041813749686
[truncated: 14,594 more rows]
